# Supplementary material for: Antiviral nanoparticle ligands identified with datamining and high-throughput virtual screening
Source: RSC Adv. 2021 Jul 1;11(37):23136–43. doi: 10.1039/d1ra02293h (PMC9034338; doi:10.1039/d1ra02293h)
Supplement: RA-011-D1RA02293H-s003 [file RA-011-D1RA02293H-s003.sdf]

ANGIOTENSIN-CONVERTING ENZYME 2
     RDKit          3D

358365  0  0  0  0  0  0  0  0999 V2000
  215.7860  177.3950  244.9240 N   0  0  0  0  0  0  0  0  0  0  0  0
  217.1950  177.3710  244.5650 C   0  0  2  0  0  0  0  0  0  0  0  0
  218.0220  178.1410  245.5810 C   0  0  0  0  0  0  0  0  0  0  0  0
  217.7060  178.1400  246.7680 O   0  0  0  0  0  0  0  0  0  0  0  0
  217.4000  177.9500  243.1710 C   0  0  0  0  0  0  0  0  0  0  0  0
  216.6820  179.1590  243.0240 O   0  0  0  0  0  0  0  0  0  0  0  0
  219.0740  178.8040  245.1060 N   0  0  0  0  0  0  0  0  0  0  0  0
  219.9590  179.5410  245.9970 C   0  0  2  0  0  0  0  0  0  0  0  0
  219.2000  180.6700  246.6810 C   0  0  0  0  0  0  0  0  0  0  0  0
  218.2250  181.2050  246.1480 O   0  0  0  0  0  0  0  0  0  0  0  0
  221.1520  180.1010  245.2220 C   0  0  2  0  0  0  0  0  0  0  0  0
  220.7700  181.3090  244.5560 O   0  0  0  0  0  0  0  0  0  0  0  0
  221.6290  179.0990  244.1900 C   0  0  0  0  0  0  0  0  0  0  0  0
  219.6470  181.0220  247.8870 N   0  0  0  0  0  0  0  0  0  0  0  0
  218.9270  182.0180  248.6730 C   0  0  2  0  0  0  0  0  0  0  0  0
  218.9710  183.3800  247.9920 C   0  0  0  0  0  0  0  0  0  0  0  0
  218.0010  184.1400  248.0410 O   0  0  0  0  0  0  0  0  0  0  0  0
  219.4810  182.0720  250.1070 C   0  0  2  0  0  0  0  0  0  0  0  0
  219.0660  180.8180  250.8740 C   0  0  0  0  0  0  0  0  0  0  0  0
  218.9870  183.3090  250.8330 C   0  0  0  0  0  0  0  0  0  0  0  0
  217.6140  180.8200  251.2940 C   0  0  0  0  0  0  0  0  0  0  0  0
  220.0910  183.7150  247.3520 N   0  0  0  0  0  0  0  0  0  0  0  0
  220.1950  185.0040  246.6750 C   0  0  2  0  0  0  0  0  0  0  0  0
  219.2070  185.1150  245.5170 C   0  0  0  0  0  0  0  0  0  0  0  0
  218.5520  186.1530  245.3400 O   0  0  0  0  0  0  0  0  0  0  0  0
  221.6240  185.2010  246.1780 C   0  0  0  0  0  0  0  0  0  0  0  0
  221.9420  186.5870  245.6720 C   0  0  0  0  0  0  0  0  0  0  0  0
  223.2350  186.6210  244.8750 C   0  0  0  0  0  0  0  0  0  0  0  0
  224.3180  186.6450  245.4960 O   0  0  0  0  0  0  0  0  0  0  0  0
  223.1710  186.6190  243.6280 O   0  0  0  0  0  0  0  0  0  0  0  0
  219.0460  184.0380  244.7490 N   0  0  0  0  0  0  0  0  0  0  0  0
  218.1420  184.0780  243.6070 C   0  0  2  0  0  0  0  0  0  0  0  0
  216.6820  184.0410  244.0400 C   0  0  0  0  0  0  0  0  0  0  0  0
  215.8230  184.6040  243.3560 O   0  0  0  0  0  0  0  0  0  0  0  0
  218.4730  182.9270  242.6570 C   0  0  0  0  0  0  0  0  0  0  0  0
  217.5120  182.7410  241.5040 C   0  0  0  0  0  0  0  0  0  0  0  0
  217.6860  181.4000  240.8150 C   0  0  0  0  0  0  0  0  0  0  0  0
  217.0280  180.4240  241.2290 O   0  0  0  0  0  0  0  0  0  0  0  0
  218.4880  181.3190  239.8630 O   0  0  0  0  0  0  0  0  0  0  0  0
  216.3770  183.3870  245.1580 N   0  0  0  0  0  0  0  0  0  0  0  0
  215.0230  183.4040  245.6970 C   0  0  2  0  0  0  0  0  0  0  0  0
  214.7060  184.7270  246.3920 C   0  0  0  0  0  0  0  0  0  0  0  0
  213.5450  185.1670  246.4050 O   0  0  0  0  0  0  0  0  0  0  0  0
  214.8820  182.2280  246.6590 C   0  0  0  0  0  0  0  0  0  0  0  0
  213.4930  181.8300  247.0760 C   0  0  0  0  0  0  0  0  0  0  0  0
  213.5130  180.4460  247.7000 C   0  0  0  0  0  0  0  0  0  0  0  0
  212.4770  179.8350  247.9400 O   0  0  0  0  0  0  0  0  0  0  0  0
  214.7130  179.9450  247.9650 N   0  0  0  0  0  0  0  0  0  0  0  0
  215.7360  185.4210  246.8740 N   0  0  0  0  0  0  0  0  0  0  0  0
  215.5610  186.7210  247.5040 C   0  0  2  0  0  0  0  0  0  0  0  0
  215.3020  187.7920  246.4630 C   0  0  0  0  0  0  0  0  0  0  0  0
  214.4970  188.7020  246.6930 O   0  0  0  0  0  0  0  0  0  0  0  0
  216.7870  187.0740  248.3400 C   0  0  0  0  0  0  0  0  0  0  0  0
  216.0020  187.7260  245.3300 N   0  0  0  0  0  0  0  0  0  0  0  0
  215.7460  188.7050  244.2820 C   0  0  2  0  0  0  0  0  0  0  0  0
  214.3070  188.6000  243.7890 C   0  0  0  0  0  0  0  0  0  0  0  0
  213.6720  189.6190  243.4850 O   0  0  0  0  0  0  0  0  0  0  0  0
  216.7320  188.4920  243.1380 C   0  0  0  0  0  0  0  0  0  0  0  0
  218.1650  188.8270  243.5120 C   0  0  0  0  0  0  0  0  0  0  0  0
  219.1610  188.2170  242.5480 C   0  0  0  0  0  0  0  0  0  0  0  0
  218.8390  188.5830  241.1200 C   0  0  0  0  0  0  0  0  0  0  0  0
  218.7540  190.0560  240.9560 N   0  0  0  0  0  0  0  0  0  0  0  0
  213.7370  187.3940  243.8380 N   0  0  0  0  0  0  0  0  0  0  0  0
  212.3370  187.2020  243.4760 C   0  0  2  0  0  0  0  0  0  0  0  0
  211.4140  187.7590  244.5480 C   0  0  0  0  0  0  0  0  0  0  0  0
  210.4000  188.3990  244.2330 O   0  0  0  0  0  0  0  0  0  0  0  0
  212.0570  185.7170  243.2530 C   0  0  2  0  0  0  0  0  0  0  0  0
  212.7150  185.2810  242.0570 O   0  0  0  0  0  0  0  0  0  0  0  0
  210.5700  185.4470  243.1590 C   0  0  0  0  0  0  0  0  0  0  0  0
  211.7580  187.5570  245.8220 N   0  0  0  0  0  0  0  0  0  0  0  0
  210.8970  188.1010  246.8660 C   0  0  2  0  0  0  0  0  0  0  0  0
  210.8580  189.6210  246.7910 C   0  0  0  0  0  0  0  0  0  0  0  0
  209.7960  190.2310  246.9450 O   0  0  0  0  0  0  0  0  0  0  0  0
  211.3660  187.6680  248.2510 C   0  0  0  0  0  0  0  0  0  0  0  0
  210.7260  188.4460  249.3660 C   0  0  0  0  0  0  0  0  0  0  0  0
  209.3550  188.5550  249.4490 C   0  0  0  0  0  0  0  0  0  0  0  0
  211.4930  189.0960  250.3040 C   0  0  0  0  0  0  0  0  0  0  0  0
  208.7710  189.2730  250.4540 C   0  0  0  0  0  0  0  0  0  0  0  0
  210.9040  189.8220  251.3110 C   0  0  0  0  0  0  0  0  0  0  0  0
  209.5450  189.9080  251.3840 C   0  0  0  0  0  0  0  0  0  0  0  0
  212.0040  190.2540  246.5410 N   0  0  0  0  0  0  0  0  0  0  0  0
  212.0160  191.7120  246.4730 C   0  0  2  0  0  0  0  0  0  0  0  0
  211.3260  192.2300  245.2180 C   0  0  0  0  0  0  0  0  0  0  0  0
  210.6970  193.3000  245.2580 O   0  0  0  0  0  0  0  0  0  0  0  0
  213.4440  192.2320  246.5610 C   0  0  0  0  0  0  0  0  0  0  0  0
  214.0440  192.0050  247.9440 C   0  0  0  0  0  0  0  0  0  0  0  0
  215.5370  192.1570  247.8990 C   0  0  0  0  0  0  0  0  0  0  0  0
  213.4440  192.9630  248.9410 C   0  0  0  0  0  0  0  0  0  0  0  0
  211.4020  191.4890  244.1060 N   0  0  0  0  0  0  0  0  0  0  0  0
  210.6200  191.8700  242.9330 C   0  0  2  0  0  0  0  0  0  0  0  0
  209.1320  191.8460  243.2400 C   0  0  0  0  0  0  0  0  0  0  0  0
  208.3860  192.7220  242.7940 O   0  0  0  0  0  0  0  0  0  0  0  0
  210.9290  190.9430  241.7630 C   0  0  0  0  0  0  0  0  0  0  0  0
  211.9540  191.5210  240.8230 C   0  0  0  0  0  0  0  0  0  0  0  0
  212.2550  192.7250  240.9500 O   0  0  0  0  0  0  0  0  0  0  0  0
  212.4570  190.7760  239.9570 O   0  0  0  0  0  0  0  0  0  0  0  0
  208.6800  190.8430  243.9920 N   0  0  0  0  0  0  0  0  0  0  0  0
  207.2750  190.8120  244.3920 C   0  0  2  0  0  0  0  0  0  0  0  0
  206.9420  191.9090  245.3960 C   0  0  0  0  0  0  0  0  0  0  0  0
  205.8110  192.4030  245.4130 O   0  0  0  0  0  0  0  0  0  0  0  0
  206.9310  189.4430  244.9710 C   0  0  0  0  0  0  0  0  0  0  0  0
  205.5450  189.3240  245.5580 C   0  0  0  0  0  0  0  0  0  0  0  0
  204.4690  189.5350  244.5250 C   0  0  0  0  0  0  0  0  0  0  0  0
  203.1070  189.6570  245.1890 C   0  0  0  0  0  0  0  0  0  0  0  0
  202.0430  188.9030  244.4700 N   0  0  0  0  0  0  0  0  0  0  0  0
  207.9060  192.3100  246.2270 N   0  0  0  0  0  0  0  0  0  0  0  0
  207.6300  193.2920  247.2750 C   0  0  2  0  0  0  0  0  0  0  0  0
  207.4540  194.6970  246.7170 C   0  0  0  0  0  0  0  0  0  0  0  0
  206.4640  195.3770  247.0270 O   0  0  0  0  0  0  0  0  0  0  0  0
  208.7530  193.2810  248.3070 C   0  0  0  0  0  0  0  0  0  0  0  0
  208.6870  194.4170  249.2870 C   0  0  0  0  0  0  0  0  0  0  0  0
  207.6870  194.4810  250.2320 C   0  0  0  0  0  0  0  0  0  0  0  0
  209.6430  195.4110  249.2740 C   0  0  0  0  0  0  0  0  0  0  0  0
  207.6340  195.5160  251.1360 C   0  0  0  0  0  0  0  0  0  0  0  0
  209.5920  196.4470  250.1740 C   0  0  0  0  0  0  0  0  0  0  0  0
  208.5850  196.4980  251.1060 C   0  0  0  0  0  0  0  0  0  0  0  0
  208.4090  195.1490  245.8970 N   0  0  0  0  0  0  0  0  0  0  0  0
  208.4260  196.5540  245.5000 C   0  0  2  0  0  0  0  0  0  0  0  0
  207.1400  196.9740  244.8050 C   0  0  0  0  0  0  0  0  0  0  0  0
  206.7030  198.1220  244.9500 O   0  0  0  0  0  0  0  0  0  0  0  0
  209.6140  196.8310  244.5850 C   0  0  0  0  0  0  0  0  0  0  0  0
  210.9260  196.4660  245.2150 C   0  0  0  0  0  0  0  0  0  0  0  0
  211.0050  196.2410  246.4170 O   0  0  0  0  0  0  0  0  0  0  0  0
  211.9700  196.4050  244.4070 N   0  0  0  0  0  0  0  0  0  0  0  0
  206.4850  196.0440  244.1140 N   0  0  0  0  0  0  0  0  0  0  0  0
  205.2910  196.3780  243.3430 C   0  0  2  0  0  0  0  0  0  0  0  0
  204.0980  196.6560  244.2490 C   0  0  0  0  0  0  0  0  0  0  0  0
  203.3150  197.5760  243.9920 O   0  0  0  0  0  0  0  0  0  0  0  0
  204.9910  195.2440  242.3620 C   0  0  0  0  0  0  0  0  0  0  0  0
  203.5360  195.0440  242.0780 C   0  0  0  0  0  0  0  0  0  0  0  0
  202.8390  195.8200  241.1790 N   0  0  0  0  0  0  0  0  0  0  0  0
  202.6530  194.1330  242.5500 C   0  0  0  0  0  0  0  0  0  0  0  0
  201.5860  195.4090  241.1240 C   0  0  0  0  0  0  0  0  0  0  0  0
  201.4470  194.3860  241.9460 N   0  0  0  0  0  0  0  0  0  0  0  0
  203.9310  195.8670  245.3060 N   0  0  0  0  0  0  0  0  0  0  0  0
  202.8700  196.1620  246.2640 C   0  0  2  0  0  0  0  0  0  0  0  0
  203.1880  197.4390  247.0310 C   0  0  0  0  0  0  0  0  0  0  0  0
  202.3040  198.2820  247.2710 O   0  0  0  0  0  0  0  0  0  0  0  0
  202.7140  194.9990  247.2380 C   0  0  0  0  0  0  0  0  0  0  0  0
  202.4120  193.6670  246.5990 C   0  0  0  0  0  0  0  0  0  0  0  0
  200.9750  193.2580  246.7820 C   0  0  0  0  0  0  0  0  0  0  0  0
  200.1390  194.1400  247.0710 O   0  0  0  0  0  0  0  0  0  0  0  0
  200.6830  192.0530  246.6440 O   0  0  0  0  0  0  0  0  0  0  0  0
  204.4620  197.5970  247.4040 N   0  0  0  0  0  0  0  0  0  0  0  0
  204.8540  198.6880  248.2850 C   0  0  2  0  0  0  0  0  0  0  0  0
  204.6720  200.0430  247.6200 C   0  0  0  0  0  0  0  0  0  0  0  0
  204.1970  200.9860  248.2600 O   0  0  0  0  0  0  0  0  0  0  0  0
  206.3010  198.5060  248.7270 C   0  0  0  0  0  0  0  0  0  0  0  0
  205.0660  200.1720  246.3510 N   0  0  0  0  0  0  0  0  0  0  0  0
  204.9520  201.4650  245.6830 C   0  0  2  0  0  0  0  0  0  0  0  0
  203.5190  201.9690  245.7080 C   0  0  0  0  0  0  0  0  0  0  0  0
  203.2650  203.1460  246.0040 O   0  0  0  0  0  0  0  0  0  0  0  0
  205.4430  201.3520  244.2400 C   0  0  0  0  0  0  0  0  0  0  0  0
  206.7460  202.0750  243.9450 C   0  0  0  0  0  0  0  0  0  0  0  0
  206.6000  203.5820  243.8710 C   0  0  0  0  0  0  0  0  0  0  0  0
  205.5570  204.1120  244.3030 O   0  0  0  0  0  0  0  0  0  0  0  0
  207.5400  204.2430  243.3840 O   0  0  0  0  0  0  0  0  0  0  0  0
  202.5630  201.0720  245.4880 N   0  0  0  0  0  0  0  0  0  0  0  0
  201.1780  201.5010  245.3840 C   0  0  2  0  0  0  0  0  0  0  0  0
  200.5720  201.7820  246.7480 C   0  0  0  0  0  0  0  0  0  0  0  0
  199.8050  202.7410  246.8960 O   0  0  0  0  0  0  0  0  0  0  0  0
  200.3590  200.4480  244.6560 C   0  0  0  0  0  0  0  0  0  0  0  0
  198.8960  200.7550  244.6800 C   0  0  0  0  0  0  0  0  0  0  0  0
  198.5430  201.9420  244.5450 O   0  0  0  0  0  0  0  0  0  0  0  0
  198.0990  199.8130  244.8500 O   0  0  0  0  0  0  0  0  0  0  0  0
  200.9450  201.0120  247.7750 N   0  0  0  0  0  0  0  0  0  0  0  0
  200.3830  201.3300  249.0850 C   0  0  2  0  0  0  0  0  0  0  0  0
  200.9930  202.6090  249.6470 C   0  0  0  0  0  0  0  0  0  0  0  0
  200.2910  203.4100  250.2820 O   0  0  0  0  0  0  0  0  0  0  0  0
  200.5830  200.1650  250.0470 C   0  0  0  0  0  0  0  0  0  0  0  0
  199.4760  199.1180  250.0240 C   0  0  0  0  0  0  0  0  0  0  0  0
  199.6200  198.1840  251.1880 C   0  0  0  0  0  0  0  0  0  0  0  0
  198.1420  199.7970  250.0780 C   0  0  0  0  0  0  0  0  0  0  0  0
  202.2670  202.8650  249.3490 N   0  0  0  0  0  0  0  0  0  0  0  0
  202.8910  204.1010  249.7960 C   0  0  2  0  0  0  0  0  0  0  0  0
  202.2500  205.3020  249.1200 C   0  0  0  0  0  0  0  0  0  0  0  0
  201.9820  206.3170  249.7720 O   0  0  0  0  0  0  0  0  0  0  0  0
  204.3870  204.0760  249.5110 C   0  0  0  0  0  0  0  0  0  0  0  0
  205.1350  205.2380  250.0960 C   0  0  0  0  0  0  0  0  0  0  0  0
  204.6260  205.9380  251.1720 C   0  0  0  0  0  0  0  0  0  0  0  0
  206.3380  205.6450  249.5560 C   0  0  0  0  0  0  0  0  0  0  0  0
  205.3070  207.0020  251.7080 C   0  0  0  0  0  0  0  0  0  0  0  0
  207.0220  206.7150  250.0880 C   0  0  0  0  0  0  0  0  0  0  0  0
  206.5050  207.3920  251.1650 C   0  0  0  0  0  0  0  0  0  0  0  0
  202.0300  205.2330  247.8030 N   0  0  0  0  0  0  0  0  0  0  0  0
  201.4130  206.3800  247.1450 C   0  0  2  0  0  0  0  0  0  0  0  0
  199.9840  206.5890  247.6320 C   0  0  0  0  0  0  0  0  0  0  0  0
  199.5430  207.7320  247.8070 O   0  0  0  0  0  0  0  0  0  0  0  0
  201.4300  206.2130  245.6320 C   0  0  0  0  0  0  0  0  0  0  0  0
  200.7440  207.3470  244.9050 C   0  0  0  0  0  0  0  0  0  0  0  0
  201.4600  208.4590  244.4990 C   0  0  0  0  0  0  0  0  0  0  0  0
  199.3910  207.3160  244.6310 C   0  0  0  0  0  0  0  0  0  0  0  0
  200.8530  209.4970  243.8390 C   0  0  0  0  0  0  0  0  0  0  0  0
  198.7790  208.3550  243.9740 C   0  0  0  0  0  0  0  0  0  0  0  0
  199.5160  209.4400  243.5810 C   0  0  0  0  0  0  0  0  0  0  0  0
  198.9130  210.4780  242.9220 O   0  0  0  0  0  0  0  0  0  0  0  0
  199.2460  205.5000  247.8590 N   0  0  0  0  0  0  0  0  0  0  0  0
  197.8910  205.6310  248.3780 C   0  0  2  0  0  0  0  0  0  0  0  0
  197.8740  206.2580  249.7620 C   0  0  0  0  0  0  0  0  0  0  0  0
  196.8820  206.8860  250.1420 O   0  0  0  0  0  0  0  0  0  0  0  0
  197.2140  204.2660  248.4150 C   0  0  0  0  0  0  0  0  0  0  0  0
  195.7270  204.3100  248.1800 C   0  0  0  0  0  0  0  0  0  0  0  0
  195.3740  204.7920  246.7910 C   0  0  0  0  0  0  0  0  0  0  0  0
  196.1960  204.7480  245.8780 O   0  0  0  0  0  0  0  0  0  0  0  0
  194.1460  205.2640  246.6260 N   0  0  0  0  0  0  0  0  0  0  0  0
  198.9490  206.0950  250.5340 N   0  0  0  0  0  0  0  0  0  0  0  0
  198.9870  206.7390  251.8460 C   0  0  2  0  0  0  0  0  0  0  0  0
  199.4290  208.1960  251.7540 C   0  0  0  0  0  0  0  0  0  0  0  0
  198.9080  209.0550  252.4780 O   0  0  0  0  0  0  0  0  0  0  0  0
  199.9160  205.9710  252.7790 C   0  0  0  0  0  0  0  0  0  0  0  0
  200.2170  206.7440  253.9210 O   0  0  0  0  0  0  0  0  0  0  0  0
  200.3750  208.4960  250.8620 N   0  0  0  0  0  0  0  0  0  0  0  0
  200.8400  209.8710  250.7140 C   0  0  2  0  0  0  0  0  0  0  0  0
  199.7430  210.7790  250.1790 C   0  0  0  0  0  0  0  0  0  0  0  0
  199.6250  211.9320  250.6070 O   0  0  0  0  0  0  0  0  0  0  0  0
  202.0620  209.9250  249.8070 C   0  0  0  0  0  0  0  0  0  0  0  0
  203.0800  209.0700  250.2820 O   0  0  0  0  0  0  0  0  0  0  0  0
  198.9320  210.2870  249.2430 N   0  0  0  0  0  0  0  0  0  0  0  0
  197.8450  211.1180  248.7350 C   0  0  2  0  0  0  0  0  0  0  0  0
  196.8300  211.4290  249.8260 C   0  0  0  0  0  0  0  0  0  0  0  0
  196.3370  212.5600  249.9250 O   0  0  0  0  0  0  0  0  0  0  0  0
  197.1660  210.4250  247.5640 C   0  0  0  0  0  0  0  0  0  0  0  0
  196.3610  211.3320  246.6500 C   0  0  0  0  0  0  0  0  0  0  0  0
  197.2680  212.3440  245.9880 C   0  0  0  0  0  0  0  0  0  0  0  0
  195.6410  210.4920  245.6200 C   0  0  0  0  0  0  0  0  0  0  0  0
  196.5360  210.4520  250.6830 N   0  0  0  0  0  0  0  0  0  0  0  0
  195.5740  210.6820  251.7520 C   0  0  2  0  0  0  0  0  0  0  0  0
  196.1440  211.5850  252.8340 C   0  0  0  0  0  0  0  0  0  0  0  0
  195.3830  212.2460  253.5460 O   0  0  0  0  0  0  0  0  0  0  0  0
  195.1180  209.3570  252.3520 C   0  0  0  0  0  0  0  0  0  0  0  0
  197.4670  211.6150  252.9920 N   0  0  0  0  0  0  0  0  0  0  0  0
  198.0440  212.5660  253.9380 C   0  0  2  0  0  0  0  0  0  0  0  0
  198.0540  213.9850  253.3720 C   0  0  0  0  0  0  0  0  0  0  0  0
  197.7860  214.9520  254.0980 O   0  0  0  0  0  0  0  0  0  0  0  0
  199.4570  212.1360  254.3190 C   0  0  0  0  0  0  0  0  0  0  0  0
  200.1390  213.1810  254.9790 O   0  0  0  0  0  0  0  0  0  0  0  0
  198.3280  214.1270  252.0730 N   0  0  0  0  0  0  0  0  0  0  0  0
  198.2850  215.4480  251.4520 C   0  0  2  0  0  0  0  0  0  0  0  0
  196.8800  216.0220  251.4930 C   0  0  0  0  0  0  0  0  0  0  0  0
  196.6990  217.2280  251.7110 O   0  0  0  0  0  0  0  0  0  0  0  0
  198.7720  215.3690  250.0100 C   0  0  0  0  0  0  0  0  0  0  0  0
  198.5550  216.6170  249.2260 C   0  0  0  0  0  0  0  0  0  0  0  0
  197.4010  217.0160  248.6260 C   0  0  0  0  0  0  0  0  0  0  0  0
  199.5330  217.6100  248.9120 C   0  0  0  0  0  0  0  0  0  0  0  0
  197.5920  218.2110  247.9810 N   0  0  0  0  0  0  0  0  0  0  0  0
  198.8960  218.5930  248.1400 C   0  0  0  0  0  0  0  0  0  0  0  0
  200.8840  217.7680  249.2180 C   0  0  0  0  0  0  0  0  0  0  0  0
  199.5610  219.7140  247.6750 C   0  0  0  0  0  0  0  0  0  0  0  0
  201.5380  218.8790  248.7540 C   0  0  0  0  0  0  0  0  0  0  0  0
  200.8800  219.8370  247.9910 C   0  0  0  0  0  0  0  0  0  0  0  0
  195.8690  215.1740  251.2910 N   0  0  0  0  0  0  0  0  0  0  0  0
  194.5000  215.6740  251.2540 C   0  0  2  0  0  0  0  0  0  0  0  0
  194.1110  216.3070  252.5810 C   0  0  0  0  0  0  0  0  0  0  0  0
  193.3860  217.3070  252.6070 O   0  0  0  0  0  0  0  0  0  0  0  0
  193.5310  214.5560  250.8840 C   0  0  0  0  0  0  0  0  0  0  0  0
  193.5540  214.2370  249.4070 C   0  0  0  0  0  0  0  0  0  0  0  0
  194.0940  214.9950  248.6050 O   0  0  0  0  0  0  0  0  0  0  0  0
  192.9550  213.1140  249.0370 N   0  0  0  0  0  0  0  0  0  0  0  0
  194.5710  215.7400  253.6970 N   0  0  0  0  0  0  0  0  0  0  0  0
  194.2800  216.3560  254.9860 C   0  0  2  0  0  0  0  0  0  0  0  0
  195.1760  217.5550  255.2570 C   0  0  0  0  0  0  0  0  0  0  0  0
  194.7280  218.5190  255.8840 O   0  0  0  0  0  0  0  0  0  0  0  0
  194.4250  215.3480  256.1210 C   0  0  0  0  0  0  0  0  0  0  0  0
  194.6670  215.9860  257.4680 C   0  0  0  0  0  0  0  0  0  0  0  0
  193.6150  216.4850  258.2130 C   0  0  0  0  0  0  0  0  0  0  0  0
  195.9440  216.0990  257.9900 C   0  0  0  0  0  0  0  0  0  0  0  0
  193.8250  217.0680  259.4460 C   0  0  0  0  0  0  0  0  0  0  0  0
  196.1640  216.6820  259.2190 C   0  0  0  0  0  0  0  0  0  0  0  0
  195.1010  217.1650  259.9420 C   0  0  0  0  0  0  0  0  0  0  0  0
  195.3160  217.7490  261.1670 O   0  0  0  0  0  0  0  0  0  0  0  0
  196.4360  217.5260  254.8090 N   0  0  0  0  0  0  0  0  0  0  0  0
  197.3070  218.6700  255.0660 C   0  0  2  0  0  0  0  0  0  0  0  0
  196.9000  219.9110  254.2840 C   0  0  0  0  0  0  0  0  0  0  0  0
  197.2890  221.0160  254.6660 O   0  0  0  0  0  0  0  0  0  0  0  0
  198.7600  218.3340  254.7490 C   0  0  0  0  0  0  0  0  0  0  0  0
  199.4750  217.7140  255.9190 C   0  0  0  0  0  0  0  0  0  0  0  0
  198.8490  217.2390  256.8600 O   0  0  0  0  0  0  0  0  0  0  0  0
  200.7980  217.7330  255.8790 N   0  0  0  0  0  0  0  0  0  0  0  0
  196.1390  219.7650  253.2020 N   0  0  0  0  0  0  0  0  0  0  0  0
  195.6820  220.9300  252.4540 C   0  0  2  0  0  0  0  0  0  0  0  0
  194.2340  221.3000  252.7580 C   0  0  0  0  0  0  0  0  0  0  0  0
  193.8380  222.4480  252.5340 O   0  0  0  0  0  0  0  0  0  0  0  0
  195.8490  220.6870  250.9500 C   0  0  2  0  0  0  0  0  0  0  0  0
  197.1900  220.2630  250.6930 O   0  0  0  0  0  0  0  0  0  0  0  0
  195.5890  221.9480  250.1580 C   0  0  0  0  0  0  0  0  0  0  0  0
  193.4480  220.3620  253.2810 N   0  0  0  0  0  0  0  0  0  0  0  0
  192.0520  220.5640  253.6710 C   0  0  2  0  0  0  0  0  0  0  0  0
  191.9120  220.1020  255.1180 C   0  0  0  0  0  0  0  0  0  0  0  0
  191.5950  218.9390  255.3660 O   0  0  0  0  0  0  0  0  0  0  0  0
  191.1240  219.7970  252.7420 C   0  0  0  0  0  0  0  0  0  0  0  0
  189.7540  220.4290  252.6190 C   0  0  0  0  0  0  0  0  0  0  0  0
  189.5570  221.6020  252.9300 O   0  0  0  0  0  0  0  0  0  0  0  0
  188.7900  219.6320  252.1750 N   0  0  0  0  0  0  0  0  0  0  0  0
  192.1190  221.0060  256.0740 N   0  0  0  0  0  0  0  0  0  0  0  0
  192.0760  220.6290  257.4840 C   0  0  2  0  0  0  0  0  0  0  0  0
  190.6270  220.6140  257.9440 C   0  0  0  0  0  0  0  0  0  0  0  0
  190.1640  221.5320  258.6300 O   0  0  0  0  0  0  0  0  0  0  0  0
  192.9100  221.5870  258.3570 C   0  0  2  0  0  0  0  0  0  0  0  0
  194.3710  221.6090  257.9200 C   0  0  0  0  0  0  0  0  0  0  0  0
  192.8660  221.1650  259.8160 C   0  0  0  0  0  0  0  0  0  0  0  0
  195.1920  220.4700  258.4640 C   0  0  0  0  0  0  0  0  0  0  0  0
  189.8850  219.5940  257.5210 N   0  0  0  0  0  0  0  0  0  0  0  0
  188.4700  219.5000  257.8530 C   0  0  2  0  0  0  0  0  0  0  0  0
  188.1690  218.1490  258.4810 C   0  0  0  0  0  0  0  0  0  0  0  0
  189.0850  217.4140  258.8600 O   0  0  0  0  0  0  0  0  0  0  0  0
  187.6030  219.6990  256.6090 C   0  0  2  0  0  0  0  0  0  0  0  0
  188.0090  218.7780  255.5890 O   0  0  0  0  0  0  0  0  0  0  0  0
  187.7360  221.1220  256.0880 C   0  0  0  0  0  0  0  0  0  0  0  0
  186.8910  217.8200  258.5960 N   0  0  0  0  0  0  0  0  0  0  0  0
  186.4590  216.5530  259.1620 C   0  0  2  0  0  0  0  0  0  0  0  0
  186.4120  215.4800  258.0830 C   0  0  0  0  0  0  0  0  0  0  0  0
  186.4760  215.7660  256.8850 O   0  0  0  0  0  0  0  0  0  0  0  0
  185.1000  216.6930  259.8480 C   0  0  0  0  0  0  0  0  0  0  0  0
  185.0590  217.7790  260.9150 C   0  0  0  0  0  0  0  0  0  0  0  0
  186.1150  217.5900  262.0000 C   0  0  0  0  0  0  0  0  0  0  0  0
  186.4340  218.5750  262.6980 O   0  0  0  0  0  0  0  0  0  0  0  0
  186.5980  216.4520  262.1880 O   0  0  0  0  0  0  0  0  0  0  0  0
  186.3460  214.2270  258.5360 N   0  0  0  0  0  0  0  0  0  0  0  0
  186.3050  213.0290  257.7010 C   0  0  2  0  0  0  0  0  0  0  0  0
  187.6570  212.7650  257.0530 C   0  0  0  0  0  0  0  0  0  0  0  0
  187.9290  211.6400  256.6230 O   0  0  0  0  0  0  0  0  0  0  0  0
  185.2150  213.1330  256.6290 C   0  0  0  0  0  0  0  0  0  0  0  0
  183.8030  213.1360  257.1830 C   0  0  0  0  0  0  0  0  0  0  0  0
  182.7560  213.3110  256.1020 C   0  0  0  0  0  0  0  0  0  0  0  0
  183.1350  213.6190  254.9530 O   0  0  0  0  0  0  0  0  0  0  0  0
  181.5560  213.1380  256.4010 O   0  0  0  0  0  0  0  0  0  0  0  0
  188.5160  213.7810  256.9770 N   0  0  0  0  0  0  0  0  0  0  0  0
  189.8090  213.5770  256.3430 C   0  0  2  0  0  0  0  0  0  0  0  0
  190.7670  212.8950  257.3030 C   0  0  0  0  0  0  0  0  0  0  0  0
  191.6670  212.1650  256.8720 O   0  0  0  0  0  0  0  0  0  0  0  0
  190.3890  214.9080  255.8710 C   0  0  0  0  0  0  0  0  0  0  0  0
  189.8990  215.2980  254.4980 C   0  0  0  0  0  0  0  0  0  0  0  0
  190.0000  214.5230  253.5500 O   0  0  0  0  0  0  0  0  0  0  0  0
  189.3580  216.5040  254.3830 N   0  0  0  0  0  0  0  0  0  0  0  0
  190.5620  213.1040  258.6040 N   0  0  0  0  0  0  0  0  0  0  0  0
  191.3920  212.4560  259.6100 C   0  0  2  0  0  0  0  0  0  0  0  0
  191.2020  210.9470  259.5500 C   0  0  0  0  0  0  0  0  0  0  0  0
  192.1600  210.1770  259.6890 O   0  0  0  0  0  0  0  0  0  0  0  0
  191.0680  213.0220  261.0030 C   0  0  0  0  0  0  0  0  0  0  0  0
  192.0040  212.4420  262.0420 C   0  0  0  0  0  0  0  0  0  0  0  0
  191.1620  214.5320  260.9830 C   0  0  0  0  0  0  0  0  0  0  0  0
  189.9600  210.5010  259.3570 N   0  0  0  0  0  0  0  0  0  0  0  0
  189.6940  209.0700  259.2840 C   0  0  2  0  0  0  0  0  0  0  0  0
  190.3970  208.4310  258.0930 C   0  0  0  0  0  0  0  0  0  0  0  0
  190.9800  207.3480  258.2190 O   0  0  0  0  0  0  0  0  0  0  0  0
  188.1890  208.8220  259.2190 C   0  0  0  0  0  0  0  0  0  0  0  0
  187.4540  209.2090  260.4850 C   0  0  0  0  0  0  0  0  0  0  0  0
  185.9590  209.0220  260.3650 C   0  0  0  0  0  0  0  0  0  0  0  0
  185.4070  209.0430  259.2660 O   0  0  0  0  0  0  0  0  0  0  0  0
  185.2930  208.8350  261.4970 N   0  0  0  0  0  0  0  0  0  0  0  0
  190.3480  209.0770  256.9240 N   0  0  0  0  0  0  0  0  0  0  0  0
  191.0730  208.5470  255.7740 C   0  0  2  0  0  0  0  0  0  0  0  0
  192.5770  208.5840  255.9910 C   0  0  0  0  0  0  0  0  0  0  0  0
  193.2830  207.6570  255.5720 O   0  0  0  0  0  0  0  0  0  0  0  0
  190.7050  209.3230  254.5140 C   0  0  0  0  0  0  0  0  0  0  0  0
  189.3460  208.9450  253.9800 C   0  0  0  0  0  0  0  0  0  0  0  0
  188.7680  207.9380  254.3830 O   0  0  0  0  0  0  0  0  0  0  0  0
  188.8250  209.7520  253.0640 N   0  0  0  0  0  0  0  0  0  0  0  0
  2  1  1  1
  3  2  1  0
  4  3  2  0
  5  2  1  0
  6  5  1  0
  7  3  1  0
  8  7  1  6
  9  8  1  0
 10  9  2  0
 11  8  1  0
 12 11  1  0
 11 13  1  6
 14  9  1  0
 15 14  1  6
 16 15  1  0
 17 16  2  0
 18 15  1  0
 19 18  1  0
 18 20  1  1
 21 19  1  0
 22 16  1  0
 23 22  1  0
 24 23  1  0
 25 24  2  0
 23 26  1  6
 27 26  1  0
 28 27  1  0
 29 28  2  0
 30 28  1  0
 31 24  1  0
 32 31  1  0
 33 32  1  0
 34 33  2  0
 32 35  1  6
 36 35  1  0
 37 36  1  0
 38 37  2  0
 39 37  1  0
 40 33  1  0
 41 40  1  0
 42 41  1  0
 43 42  2  0
 41 44  1  1
 45 44  1  0
 46 45  1  0
 47 46  2  0
 48 46  1  0
 49 42  1  0
 50 49  1  0
 51 50  1  0
 52 51  2  0
 50 53  1  6
 54 51  1  0
 55 54  1  0
 56 55  1  0
 57 56  2  0
 55 58  1  6
 59 58  1  0
 60 59  1  0
 61 60  1  0
 62 61  1  0
 63 56  1  0
 64 63  1  1
 65 64  1  0
 66 65  2  0
 67 64  1  0
 68 67  1  0
 67 69  1  6
 70 65  1  0
 71 70  1  0
 72 71  1  0
 73 72  2  0
 71 74  1  1
 75 74  1  0
 76 75  2  0
 77 75  1  0
 78 76  1  0
 79 77  2  0
 80 78  2  0
 80 79  1  0
 81 72  1  0
 82 81  1  0
 83 82  1  0
 84 83  2  0
 82 85  1  6
 86 85  1  0
 87 86  1  0
 88 86  1  0
 89 83  1  0
 90 89  1  0
 91 90  1  0
 92 91  2  0
 90 93  1  6
 94 93  1  0
 95 94  2  0
 96 94  1  0
 97 91  1  0
 98 97  1  0
 99 98  1  0
100 99  2  0
 98101  1  1
102101  1  0
103102  1  0
104103  1  0
105104  1  0
106 99  1  0
107106  1  0
108107  1  0
109108  2  0
107110  1  1
111110  1  0
112111  2  0
113111  1  0
114112  1  0
115113  2  0
116114  2  0
116115  1  0
117108  1  0
118117  1  0
119118  1  0
120119  2  0
118121  1  6
122121  1  0
123122  2  0
124122  1  0
125119  1  0
126125  1  0
127126  1  0
128127  2  0
126129  1  6
130129  1  0
131130  1  0
132130  2  0
133131  2  0
134133  1  0
134132  1  0
135127  1  0
136135  1  0
137136  1  0
138137  2  0
136139  1  1
140139  1  0
141140  1  0
142141  2  0
143141  1  0
144137  1  0
145144  1  0
146145  1  0
147146  2  0
145148  1  6
149146  1  0
150149  1  0
151150  1  0
152151  2  0
150153  1  6
154153  1  0
155154  1  0
156155  2  0
157155  1  0
158151  1  0
159158  1  0
160159  1  0
161160  2  0
159162  1  1
163162  1  0
164163  2  0
165163  1  0
166160  1  0
167166  1  0
168167  1  0
169168  2  0
167170  1  1
171170  1  0
172171  1  0
173171  1  0
174168  1  0
175174  1  0
176175  1  0
177176  2  0
175178  1  6
179178  1  0
180179  2  0
181179  1  0
182180  1  0
183181  2  0
184183  1  0
184182  2  0
185176  1  0
186185  1  0
187186  1  0
188187  2  0
186189  1  6
190189  1  0
191190  2  0
192190  1  0
193191  1  0
194192  2  0
195194  1  0
195193  2  0
196195  1  0
197187  1  0
198197  1  0
199198  1  0
200199  2  0
198201  1  1
202201  1  0
203202  1  0
204203  2  0
205203  1  0
206199  1  0
207206  1  0
208207  1  0
209208  2  0
207210  1  1
211210  1  0
212208  1  0
213212  1  0
214213  1  0
215214  2  0
213216  1  6
217216  1  0
218214  1  0
219218  1  0
220219  1  0
221220  2  0
219222  1  6
223222  1  0
224223  1  0
225223  1  0
226220  1  0
227226  1  0
228227  1  0
229228  2  0
227230  1  1
231228  1  0
232231  1  0
233232  1  0
234233  2  0
232235  1  6
236235  1  0
237233  1  0
238237  1  0
239238  1  0
240239  2  0
238241  1  6
242241  1  0
243242  2  0
244242  1  0
245243  1  0
246244  2  0
246245  1  0
247244  1  0
248246  1  0
249247  2  0
250249  1  0
250248  2  0
251239  1  0
252251  1  0
253252  1  0
254253  2  0
252255  1  1
256255  1  0
257256  2  0
258256  1  0
259253  1  0
260259  1  0
261260  1  0
262261  2  0
260263  1  1
264263  1  0
265264  2  0
266264  1  0
267265  1  0
268266  2  0
269268  1  0
269267  2  0
270269  1  0
271261  1  0
272271  1  0
273272  1  0
274273  2  0
272275  1  6
276275  1  0
277276  2  0
278276  1  0
279273  1  0
280279  1  1
281280  1  0
282281  2  0
283280  1  0
284283  1  0
283285  1  6
286281  1  0
287286  1  0
288287  1  0
289288  2  0
287290  1  6
291290  1  0
292291  2  0
293291  1  0
294288  1  0
295294  1  6
296295  1  0
297296  2  0
298295  1  0
299298  1  0
298300  1  1
301299  1  0
302296  1  0
303302  1  6
304303  1  0
305304  2  0
306303  1  0
307306  1  0
306308  1  6
309304  1  0
310309  1  0
311310  1  0
312311  2  0
310313  1  6
314313  1  0
315314  1  0
316315  2  0
317315  1  0
318311  1  0
319318  1  0
320319  1  0
321320  2  0
319322  1  6
323322  1  0
324323  1  0
325324  2  0
326324  1  0
327320  1  0
328327  1  0
329328  1  0
330329  2  0
328331  1  1
332331  1  0
333332  2  0
334332  1  0
335329  1  0
336335  1  6
337336  1  0
338337  2  0
339336  1  0
340339  1  0
341339  1  0
342337  1  0
343342  1  0
344343  1  0
345344  2  0
343346  1  6
347346  1  0
348347  1  0
349348  2  0
350348  1  0
351344  1  0
352351  1  0
352353  1  1
354353  2  0
355352  1  0
356355  1  0
357356  2  0
358356  1  0
M  END
