# Supplementary material for: Antiviral nanoparticle ligands identified with datamining and high-throughput virtual screening
Source: RSC Adv. 2021 Jul 1;11(37):23136–43. doi: 10.1039/d1ra02293h (PMC9034338; doi:10.1039/d1ra02293h)
Supplement: RA-011-D1RA02293H-s004 [file RA-011-D1RA02293H-s004.sdf]

rDock on collection 9274/Array of sdfs_000000.sdf.sdf
 OpenBabel01192115203D
libRbt.so/2013.1/901 2013/11/27
  5  4  0  0  0  0  0  0  0  0999 V2000
  217.0278  178.5183  250.1868 C   0  0  0  0  0  0  0  0  0  0  0  0
  217.7723  178.1167  249.2604 O   0  0  0  0  0  0  0  0  0  0  0  0
  215.7764  178.1310  249.9861 O   0  0  0  0  0  0  0  0  0  0  0  0
  217.2716  179.1905  251.2138 O   0  5  0  0  0  0  0  0  0  0  0  0
  216.0240  177.6805  249.1533 H   0  0  0  0  0  0  0  0  0  0  0  0
  1  2  2  0  0  0  0
  1  3  1  0  0  0  0
  1  4  1  0  0  0  0
  3  5  1  0  0  0  0
M  CHG  1   4  -1
M  END
>  <CHROM.1>
-0.00038022,216.94224537,178.47386951,250.14345728,-1.39083182,-0.17991709
-2.11426888

>  <Name>


>  <RI>
0

>  <Rbt.Current_Directory>
/data/dnb03/galaxy_db/job_working_directory/014/442/14442258/working

>  <Rbt.Executable>
rbdock ($Id: //depot/dev/client3/rdock/2013.1/src/exe/rbdock.cxx#4 $)

>  <Rbt.Library>
libRbt.so (2013.1, Build901 2013/11/27)

>  <Rbt.Parameter_File>
/usr/local/tools/_conda/envs/__rdock@2013.1-0/share/rdock-2013.1-1/data/scripts/dock.prm

>  <Rbt.Receptor>
receptor.prm

>  <SCORE>
5.4

>  <SCORE.INTER>
5.4

>  <SCORE.INTER.CONST>
1

>  <SCORE.INTER.POLAR>
0

>  <SCORE.INTER.REPUL>
0

>  <SCORE.INTER.ROT>
0

>  <SCORE.INTER.VDW>
0

>  <SCORE.INTER.norm>
1.35

>  <SCORE.INTRA>
3.62601e-08

>  <SCORE.INTRA.DIHEDRAL>
7.25201e-08

>  <SCORE.INTRA.DIHEDRAL.0>
9.13212e-08

>  <SCORE.INTRA.POLAR>
0

>  <SCORE.INTRA.POLAR.0>
0

>  <SCORE.INTRA.REPUL>
0

>  <SCORE.INTRA.REPUL.0>
0

>  <SCORE.INTRA.VDW>
0

>  <SCORE.INTRA.VDW.0>
0

>  <SCORE.INTRA.norm>
9.06501e-09

>  <SCORE.RESTR>


>  <SCORE.RESTR.norm>
0

>  <SCORE.SYSTEM>
0

>  <SCORE.SYSTEM.CONST>
0

>  <SCORE.SYSTEM.DIHEDRAL>
0

>  <SCORE.SYSTEM.norm>
0

>  <SCORE.heavy>
4

>  <SCORE.norm>
1.35

>  <TransFSReceptor>
receptor

>  <TransFSScore>
0.559410

$$$$

 OpenBabel01192115203D
libRbt.so/2013.1/901 2013/11/27
 22 23  0  0  0  0  0  0  0  0999 V2000
  201.8139  209.1880  249.4440 C   0  0  0  0  0  0  0  0  0  0  0  0
  200.7484  209.2247  250.5166 N   0  3  0  0  0  0  0  0  0  0  0  0
  201.2333  209.0373  251.3998 H   0  0  0  0  0  0  0  0  0  0  0  0
  200.2070  210.6347  250.6226 C   0  0  0  0  0  0  0  0  0  0  0  0
  199.6952  208.1693  250.2879 C   0  0  0  0  0  0  0  0  0  0  0  0
  198.8862  207.8929  251.5566 C   0  0  0  0  0  0  0  0  0  0  0  0
  199.7535  207.5821  252.6456 O   0  0  0  0  0  0  0  0  0  0  0  0
  199.0402  207.4487  253.9028 C   0  0  1  0  0  0  0  0  0  0  0  0
  199.9806  206.9113  254.9787 C   0  0  0  0  0  0  0  0  0  0  0  0
  199.4561  206.5012  256.2193 C   0  0  0  0  0  0  0  0  0  0  0  0
  200.2690  205.8732  257.1665 C   0  0  0  0  0  0  0  0  0  0  0  0
  201.6168  205.6612  256.8898 C   0  0  0  0  0  0  0  0  0  0  0  0
  202.1583  206.0715  255.6739 C   0  0  0  0  0  0  0  0  0  0  0  0
  201.3442  206.6919  254.7209 C   0  0  0  0  0  0  0  0  0  0  0  0
  202.6123  204.8725  258.0492 Cl  0  0  0  0  0  0  0  0  0  0  0  0
  198.3833  208.7763  254.2490 C   0  0  0  0  0  0  0  0  0  0  0  0
  196.9885  208.8529  254.4414 C   0  0  0  0  0  0  0  0  0  0  0  0
  196.3694  210.0535  254.7935 C   0  0  0  0  0  0  0  0  0  0  0  0
  197.1304  211.2068  254.9534 C   0  0  0  0  0  0  0  0  0  0  0  0
  198.5031  211.1597  254.7482 C   0  0  0  0  0  0  0  0  0  0  0  0
  199.1312  209.9567  254.3967 C   0  0  0  0  0  0  0  0  0  0  0  0
  200.8452  209.9945  254.1773 Cl  0  0  0  0  0  0  0  0  0  0  0  0
  1  2  1  0  0  0  0
  2  3  1  0  0  0  0
  2  4  1  0  0  0  0
  2  5  1  0  0  0  0
  5  6  1  0  0  0  0
  6  7  1  0  0  0  0
  8  7  1  6  0  0  0
  8  9  1  0  0  0  0
  8 16  1  0  0  0  0
  9 14  1  0  0  0  0
  9 10  2  0  0  0  0
 10 11  1  0  0  0  0
 11 12  2  0  0  0  0
 12 13  1  0  0  0  0
 12 15  1  0  0  0  0
 13 14  2  0  0  0  0
 16 21  1  0  0  0  0
 16 17  2  0  0  0  0
 17 18  1  0  0  0  0
 18 19  2  0  0  0  0
 19 20  1  0  0  0  0
 20 21  2  0  0  0  0
 21 22  1  0  0  0  0
M  CHG  1   2   1
M  END
>  <CHROM.1>
161.71267254,-53.48398893,173.99851116,171.42559181,-169.89834282,122.09451086
200.05037147,208.14006590,254.19559157,-1.98794232,-0.67201561,1.96836687

>  <Name>


>  <RI>
0

>  <Rbt.Current_Directory>
/data/dnb03/galaxy_db/job_working_directory/014/442/14442259/working

>  <Rbt.Executable>
rbdock ($Id: //depot/dev/client3/rdock/2013.1/src/exe/rbdock.cxx#4 $)

>  <Rbt.Library>
libRbt.so (2013.1, Build901 2013/11/27)

>  <Rbt.Parameter_File>
/usr/local/tools/_conda/envs/__rdock@2013.1-0/share/rdock-2013.1-1/data/scripts/dock.prm

>  <Rbt.Receptor>
receptor.prm

>  <SCORE>
9.66661

>  <SCORE.INTER>
11.4

>  <SCORE.INTER.CONST>
1

>  <SCORE.INTER.POLAR>
0

>  <SCORE.INTER.REPUL>
0

>  <SCORE.INTER.ROT>
6

>  <SCORE.INTER.VDW>
0

>  <SCORE.INTER.norm>
0.542857

>  <SCORE.INTRA>
-1.73339

>  <SCORE.INTRA.DIHEDRAL>
1.15227

>  <SCORE.INTRA.DIHEDRAL.0>
1.64225

>  <SCORE.INTRA.POLAR>
-0.0362101

>  <SCORE.INTRA.POLAR.0>
0

>  <SCORE.INTRA.REPUL>
0

>  <SCORE.INTRA.REPUL.0>
0

>  <SCORE.INTRA.VDW>
-2.18641

>  <SCORE.INTRA.VDW.0>
-0.75956

>  <SCORE.INTRA.norm>
-0.0825423

>  <SCORE.RESTR>


>  <SCORE.RESTR.norm>
0

>  <SCORE.SYSTEM>
0

>  <SCORE.SYSTEM.CONST>
0

>  <SCORE.SYSTEM.DIHEDRAL>
0

>  <SCORE.SYSTEM.norm>
0

>  <SCORE.heavy>
21

>  <SCORE.norm>
0.460315

>  <TransFSReceptor>
receptor

>  <TransFSScore>
0.002345

$$$$

 OpenBabel01192115203D
libRbt.so/2013.1/901 2013/11/27
 44 48  0  0  0  0  0  0  0  0999 V2000
  188.6794  221.1529  267.0856 C   0  0  0  0  0  0  0  0  0  0  0  0
  188.1476  220.4210  265.8268 C   0  0  2  0  0  0  0  0  0  0  0  0
  189.3467  219.8080  265.1671 C   0  0  1  0  0  0  0  0  0  0  0  0
  189.1712  218.3432  264.8035 C   0  0  0  0  0  0  0  0  0  0  0  0
  188.9693  217.1092  265.3690 C   0  0  0  0  0  0  0  0  0  0  0  0
  188.5377  216.5276  266.7194 C   0  0  2  0  0  0  0  0  0  0  0  0
  188.7137  215.0739  266.6609 C   0  0  0  0  0  0  0  0  0  0  0  0
  189.0609  214.9235  265.3056 C   0  0  0  0  0  0  0  0  0  0  0  0
  189.4346  216.0574  264.7025 N   0  5  0  0  0  0  0  0  0  0  0  0
  188.7022  213.7263  264.4700 C   0  0  0  0  0  0  0  0  0  0  0  0
  188.4424  213.7406  263.1297 C   0  0  0  0  0  0  0  0  0  0  0  0
  187.9493  212.5099  262.3078 C   0  0  2  0  0  0  0  0  0  0  0  0
  187.8759  213.0760  260.8496 C   0  0  2  0  0  0  0  0  0  0  0  0
  188.0100  214.5936  261.0135 C   0  0  0  0  0  0  0  0  0  0  0  0
  187.7912  215.5096  260.0643 C   0  0  0  0  0  0  0  0  0  0  0  0
  188.2049  217.0084  259.9535 C   0  0  2  0  0  0  0  0  0  0  0  0
  189.6884  217.2312  260.2487 C   0  0  2  0  0  0  0  0  0  0  0  0
  189.6751  218.2870  261.3724 C   0  0  2  0  0  0  0  0  0  0  0  0
  188.2360  218.8373  261.5200 C   0  0  0  0  0  0  0  0  0  0  0  0
  187.8028  219.8809  262.3256 C   0  0  0  0  0  0  0  0  0  0  0  0
  188.3413  220.9373  263.3830 C   0  0  1  0  0  0  0  0  0  0  0  0
  187.4157  221.1849  264.7044 C   0  0  2  0  0  0  0  0  0  0  0  0
  187.2707  222.6153  265.1988 C   0  0  0  0  0  0  0  0  0  0  0  0
  186.0670  223.1916  265.3449 C   0  0  0  0  0  0  0  0  0  0  0  0
  189.6310  220.5008  263.9668 N   0  5  0  0  0  0  0  0  0  0  0  0
  187.4121  218.0288  260.7397 N   0  5  0  0  0  0  0  0  0  0  0  0
  190.8271  219.2769  261.2897 C   0  0  0  0  0  0  0  0  0  0  0  0
  190.5318  217.5637  259.0237 C   0  0  0  0  0  0  0  0  0  0  0  0
  191.5418  216.7932  258.5887 C   0  0  0  0  0  0  0  0  0  0  0  0
  188.4873  214.8207  262.2969 N   0  5  0  0  0  0  0  0  0  0  0  0
  186.7700  212.5891  259.9291 C   0  0  0  0  0  0  0  0  0  0  0  0
  186.6694  211.8348  262.8740 C   0  0  0  0  0  0  0  0  0  0  0  0
  186.8735  211.0243  264.1630 C   0  0  0  0  0  0  0  0  0  0  0  0
  187.7977  209.8480  263.9723 C   0  0  0  0  0  0  0  0  0  0  0  0
  188.9508  209.8122  264.3856 O   0  0  0  0  0  0  0  0  0  0  0  0
  187.3003  208.8702  263.1847 O   0  0  0  0  0  0  0  0  0  0  0  0
  188.6261  214.1773  267.8227 C   0  0  0  0  0  0  0  0  0  0  0  0
  189.9528  213.3826  267.9117 C   0  0  0  0  0  0  0  0  0  0  0  0
  190.3556  212.4084  266.7651 C   0  0  0  0  0  0  0  0  0  0  0  0
  191.1980  212.4921  265.8915 O   0  0  0  0  0  0  0  0  0  0  0  0
  189.4155  211.4260  266.5990 O   0  0  0  0  0  0  0  0  0  0  0  0
  187.2533  217.0110  267.2859 C   0  0  0  0  0  0  0  0  0  0  0  0
  187.9394  208.1445  263.0323 H   0  0  0  0  0  0  0  0  0  0  0  0
  189.5883  210.8439  265.8274 H   0  0  0  0  0  0  0  0  0  0  0  0
  2  1  1  1  0  0  0
  2 22  1  0  0  0  0
  2  3  1  0  0  0  0
  3 25  1  0  0  0  0
  3  4  1  6  0  0  0
  4  5  2  0  0  0  0
  5  9  1  0  0  0  0
  5  6  1  0  0  0  0
  6  7  1  0  0  0  0
  6 42  1  6  0  0  0
  7  8  2  0  0  0  0
  7 37  1  0  0  0  0
  8  9  1  0  0  0  0
  8 10  1  0  0  0  0
 10 11  2  0  0  0  0
 11 30  1  0  0  0  0
 11 12  1  0  0  0  0
 12 13  1  0  0  0  0
 12 32  1  1  0  0  0
 13 14  1  0  0  0  0
 13 31  1  1  0  0  0
 14 15  2  0  0  0  0
 14 30  1  0  0  0  0
 16 15  1  1  0  0  0
 16 26  1  0  0  0  0
 16 17  1  0  0  0  0
 17 18  1  0  0  0  0
 17 28  1  6  0  0  0
 18 19  1  0  0  0  0
 18 27  1  6  0  0  0
 19 20  2  0  0  0  0
 19 26  1  0  0  0  0
 21 20  1  6  0  0  0
 21 22  1  0  0  0  0
 21 25  1  0  0  0  0
 22 23  1  1  0  0  0
 23 24  2  0  0  0  0
 28 29  2  0  0  0  0
 32 33  1  0  0  0  0
 33 34  1  0  0  0  0
 34 35  2  0  0  0  0
 34 36  1  0  0  0  0
 36 43  1  0  0  0  0
 37 38  1  0  0  0  0
 38 39  1  0  0  0  0
 39 40  2  0  0  0  0
 39 41  1  0  0  0  0
 41 44  1  0  0  0  0
M  CHG  4   9  -1  25  -1  26  -1  30  -1
M  END
>  <CHROM.1>
-123.72575777,-72.87634943,-117.91951078,-120.45219649,-63.17911425,105.75305192
176.48399455,-63.36909012,106.52549111,174.26875280,188.60502484,215.94291779
263.70114879,1.69617001,1.56437909,-0.14310518

>  <Name>


>  <RI>
0

>  <Rbt.Current_Directory>
/data/dnb03/galaxy_db/job_working_directory/014/442/14442260/working

>  <Rbt.Executable>
rbdock ($Id: //depot/dev/client3/rdock/2013.1/src/exe/rbdock.cxx#4 $)

>  <Rbt.Library>
libRbt.so (2013.1, Build901 2013/11/27)

>  <Rbt.Parameter_File>
/usr/local/tools/_conda/envs/__rdock@2013.1-0/share/rdock-2013.1-1/data/scripts/dock.prm

>  <Rbt.Receptor>
receptor.prm

>  <SCORE>
3.93228

>  <SCORE.INTER>
13.4

>  <SCORE.INTER.CONST>
1

>  <SCORE.INTER.POLAR>
0

>  <SCORE.INTER.REPUL>
0

>  <SCORE.INTER.ROT>
8

>  <SCORE.INTER.VDW>
0

>  <SCORE.INTER.norm>
0.319048

>  <SCORE.INTRA>
-9.46772

>  <SCORE.INTRA.DIHEDRAL>
-1.0734

>  <SCORE.INTRA.DIHEDRAL.0>
7.02613

>  <SCORE.INTRA.POLAR>
-1

>  <SCORE.INTRA.POLAR.0>
0

>  <SCORE.INTRA.REPUL>
0

>  <SCORE.INTRA.REPUL.0>
0

>  <SCORE.INTRA.VDW>
-5.53102

>  <SCORE.INTRA.VDW.0>
1.02126

>  <SCORE.INTRA.norm>
-0.225422

>  <SCORE.RESTR>


>  <SCORE.RESTR.norm>
0

>  <SCORE.SYSTEM>
0

>  <SCORE.SYSTEM.CONST>
0

>  <SCORE.SYSTEM.DIHEDRAL>
0

>  <SCORE.SYSTEM.norm>
0

>  <SCORE.heavy>
42

>  <SCORE.norm>
0.0936256

>  <TransFSReceptor>
receptor

>  <TransFSScore>
0.002446

$$$$

 OpenBabel01192115203D
libRbt.so/2013.1/901 2013/11/27
 18 19  0  0  0  0  0  0  0  0999 V2000
  207.4240  190.9296  247.3742 C   0  0  0  0  0  0  0  0  0  0  0  0
  206.0475  191.1155  247.3605 C   0  0  0  0  0  0  0  0  0  0  0  0
  205.2984  190.6921  246.2595 C   0  0  0  0  0  0  0  0  0  0  0  0
  205.9197  190.0701  245.1636 C   0  0  0  0  0  0  0  0  0  0  0  0
  207.3058  189.8746  245.1719 C   0  0  0  0  0  0  0  0  0  0  0  0
  208.0457  190.3147  246.2886 C   0  0  0  0  0  0  0  0  0  0  0  0
  208.0975  189.1454  244.1398 C   0  0  0  0  0  0  0  0  0  0  0  0
  207.5182  188.8933  243.0861 O   0  0  0  0  0  0  0  0  0  0  0  0
  209.3782  188.7369  244.4695 N   0  0  0  0  0  0  0  0  0  0  0  0
  210.2625  188.0304  243.6159 C   0  0  0  0  0  0  0  0  0  0  0  0
  211.5068  187.6386  244.1221 C   0  0  0  0  0  0  0  0  0  0  0  0
  212.3865  186.9012  243.3244 C   0  0  0  0  0  0  0  0  0  0  0  0
  212.0554  186.5658  242.0123 C   0  0  0  0  0  0  0  0  0  0  0  0
  210.8331  186.9783  241.4923 C   0  0  0  0  0  0  0  0  0  0  0  0
  209.9465  187.7056  242.2904 C   0  0  0  0  0  0  0  0  0  0  0  0
  213.8956  186.3781  243.9695 Cl  0  0  0  0  0  0  0  0  0  0  0  0
  204.7718  189.4777  243.7723 Br  0  0  0  0  0  0  0  0  0  0  0  0
  209.6958  188.9046  245.4172 H   0  0  0  0  0  0  0  0  0  0  0  0
  1  6  1  0  0  0  0
  1  2  2  0  0  0  0
  2  3  1  0  0  0  0
  3  4  2  0  0  0  0
  4  5  1  0  0  0  0
  4 17  1  0  0  0  0
  5  6  2  0  0  0  0
  5  7  1  0  0  0  0
  7  8  2  0  0  0  0
  7  9  1  0  0  0  0
  9 10  1  0  0  0  0
  9 18  1  0  0  0  0
 10 15  1  0  0  0  0
 10 11  2  0  0  0  0
 11 12  1  0  0  0  0
 12 13  2  0  0  0  0
 12 16  1  0  0  0  0
 13 14  1  0  0  0  0
 14 15  2  0  0  0  0
M  END
>  <CHROM.1>
13.05334848,-177.25875423,208.33892720,188.76559891,244.18934669,-2.77917418
0.28425986,-2.04792158

>  <Name>


>  <RI>
0

>  <Rbt.Current_Directory>
/data/dnb03/galaxy_db/job_working_directory/014/442/14442261/working

>  <Rbt.Executable>
rbdock ($Id: //depot/dev/client3/rdock/2013.1/src/exe/rbdock.cxx#4 $)

>  <Rbt.Library>
libRbt.so (2013.1, Build901 2013/11/27)

>  <Rbt.Parameter_File>
/usr/local/tools/_conda/envs/__rdock@2013.1-0/share/rdock-2013.1-1/data/scripts/dock.prm

>  <Rbt.Receptor>
receptor.prm

>  <SCORE>
6.56495

>  <SCORE.INTER>
7.4

>  <SCORE.INTER.CONST>
1

>  <SCORE.INTER.POLAR>
0

>  <SCORE.INTER.REPUL>
0

>  <SCORE.INTER.ROT>
2

>  <SCORE.INTER.VDW>
0

>  <SCORE.INTER.norm>
0.435294

>  <SCORE.INTRA>
-0.835051

>  <SCORE.INTRA.DIHEDRAL>
-4.3014

>  <SCORE.INTRA.DIHEDRAL.0>
4.97744

>  <SCORE.INTRA.POLAR>
0

>  <SCORE.INTRA.POLAR.0>
0

>  <SCORE.INTRA.REPUL>
0

>  <SCORE.INTRA.REPUL.0>
0

>  <SCORE.INTRA.VDW>
1.31565

>  <SCORE.INTRA.VDW.0>
-0.407264

>  <SCORE.INTRA.norm>
-0.0491207

>  <SCORE.RESTR>


>  <SCORE.RESTR.norm>
0

>  <SCORE.SYSTEM>
0

>  <SCORE.SYSTEM.CONST>
0

>  <SCORE.SYSTEM.DIHEDRAL>
0

>  <SCORE.SYSTEM.norm>
0

>  <SCORE.heavy>
17

>  <SCORE.norm>
0.386173

>  <TransFSReceptor>
receptor

>  <TransFSScore>
0.000174

$$$$

 OpenBabel01192115203D
libRbt.so/2013.1/901 2013/11/27
 34 37  0  0  0  0  0  0  0  0999 V2000
  218.3228  179.5239  240.9021 C   0  0  0  0  0  0  0  0  0  0  0  0
  217.8078  180.8823  240.4085 C   0  0  0  0  0  0  0  0  0  0  0  0
  218.8848  181.9749  240.5105 C   0  0  0  0  0  0  0  0  0  0  0  0
  219.6139  181.8839  241.8178 C   0  0  0  0  0  0  0  0  0  0  0  0
  219.5807  180.8013  242.6785 C   0  0  0  0  0  0  0  0  0  0  0  0
  218.7569  179.5782  242.3759 C   0  0  0  0  0  0  0  0  0  0  0  0
  220.4007  181.0292  243.8406 C   0  0  0  0  0  0  0  0  0  0  0  0
  220.9796  182.2860  243.8111 C   0  0  0  0  0  0  0  0  0  0  0  0
  220.6662  183.1103  242.3570 S   0  0  0  0  0  0  0  0  0  0  0  0
  221.7674  183.0000  244.6971 N   0  0  0  0  0  0  0  0  0  0  0  0
  222.3870  182.3563  245.7624 C   0  0  0  0  0  0  0  0  0  0  0  0
  223.2080  181.4483  245.6391 O   0  0  0  0  0  0  0  0  0  0  0  0
  221.9793  182.8741  247.1454 C   0  0  0  0  0  0  0  0  0  0  0  0
  220.2646  182.3879  247.5404 S   0  0  0  0  0  0  0  0  0  0  0  0
  219.3493  183.0748  246.1726 C   0  0  0  0  0  0  0  0  0  0  0  0
  218.4245  182.2587  245.6320 N   0  0  0  0  0  0  0  0  0  0  0  0
  217.7038  182.7112  244.5845 C   0  0  0  0  0  0  0  0  0  0  0  0
  217.8932  183.9847  244.0891 C   0  0  0  0  0  0  0  0  0  0  0  0
  218.8641  184.7687  244.6933 C   0  0  0  0  0  0  0  0  0  0  0  0
  219.6077  184.3176  245.7409 N   0  0  0  0  0  0  0  0  0  0  0  0
  219.0943  186.1767  244.1563 C   0  0  0  0  0  0  0  0  0  0  0  0
  217.9957  186.9833  244.2782 F   0  0  0  0  0  0  0  0  0  0  0  0
  220.0985  186.8372  244.7968 F   0  0  0  0  0  0  0  0  0  0  0  0
  219.4063  186.1943  242.8304 F   0  0  0  0  0  0  0  0  0  0  0  0
  216.6918  181.7848  244.0220 C   0  0  0  0  0  0  0  0  0  0  0  0
  216.4842  180.4920  244.5511 C   0  0  0  0  0  0  0  0  0  0  0  0
  215.5622  179.6062  243.9808 C   0  0  0  0  0  0  0  0  0  0  0  0
  214.8229  180.0051  242.8770 C   0  0  0  0  0  0  0  0  0  0  0  0
  214.9824  181.2746  242.3403 C   0  0  0  0  0  0  0  0  0  0  0  0
  215.9067  182.1571  242.9130 C   0  0  0  0  0  0  0  0  0  0  0  0
  213.9457  179.1563  242.3269 F   0  0  0  0  0  0  0  0  0  0  0  0
  220.6588  180.0376  244.8435 C   0  0  0  0  0  0  0  0  0  0  0  0
  220.8983  179.1643  245.5704 N   0  0  0  0  0  0  0  0  0  0  0  0
  221.4675  183.9516  244.8835 H   0  0  0  0  0  0  0  0  0  0  0  0
  1  6  1  0  0  0  0
  1  2  1  0  0  0  0
  2  3  1  0  0  0  0
  3  4  1  0  0  0  0
  4  9  1  0  0  0  0
  4  5  2  0  0  0  0
  5  6  1  0  0  0  0
  5  7  1  0  0  0  0
  7  8  2  0  0  0  0
  7 32  1  0  0  0  0
  8  9  1  0  0  0  0
  8 10  1  0  0  0  0
 10 11  1  0  0  0  0
 10 34  1  0  0  0  0
 11 12  2  0  0  0  0
 11 13  1  0  0  0  0
 13 14  1  0  0  0  0
 14 15  1  0  0  0  0
 15 20  1  0  0  0  0
 15 16  2  0  0  0  0
 16 17  1  0  0  0  0
 17 18  2  0  0  0  0
 17 25  1  0  0  0  0
 18 19  1  0  0  0  0
 19 20  2  0  0  0  0
 19 21  1  0  0  0  0
 21 22  1  0  0  0  0
 21 23  1  0  0  0  0
 21 24  1  0  0  0  0
 25 30  1  0  0  0  0
 25 26  2  0  0  0  0
 26 27  1  0  0  0  0
 27 28  2  0  0  0  0
 28 29  1  0  0  0  0
 28 31  1  0  0  0  0
 29 30  2  0  0  0  0
 32 33  3  0  0  0  0
M  END
>  <CHROM.1>
15.17696004,60.70141693,70.93797729,-56.68663055,135.34172101,0.09267461
62.34060859,218.98963918,182.39382228,243.99874130,-2.52102583,-0.57163903
0.02643115

>  <Name>


>  <RI>
0

>  <Rbt.Current_Directory>
/data/dnb03/galaxy_db/job_working_directory/014/442/14442262/working

>  <Rbt.Executable>
rbdock ($Id: //depot/dev/client3/rdock/2013.1/src/exe/rbdock.cxx#4 $)

>  <Rbt.Library>
libRbt.so (2013.1, Build901 2013/11/27)

>  <Rbt.Parameter_File>
/usr/local/tools/_conda/envs/__rdock@2013.1-0/share/rdock-2013.1-1/data/scripts/dock.prm

>  <Rbt.Receptor>
receptor.prm

>  <SCORE>
1.70407

>  <SCORE.INTER>
12.4

>  <SCORE.INTER.CONST>
1

>  <SCORE.INTER.POLAR>
0

>  <SCORE.INTER.REPUL>
0

>  <SCORE.INTER.ROT>
7

>  <SCORE.INTER.VDW>
0

>  <SCORE.INTER.norm>
0.375758

>  <SCORE.INTRA>
-10.6959

>  <SCORE.INTRA.DIHEDRAL>
-1.20568

>  <SCORE.INTRA.DIHEDRAL.0>
6.26469

>  <SCORE.INTRA.POLAR>
-0.312478

>  <SCORE.INTRA.POLAR.0>
0

>  <SCORE.INTRA.REPUL>
0

>  <SCORE.INTRA.REPUL.0>
0

>  <SCORE.INTRA.VDW>
-9.03066

>  <SCORE.INTRA.VDW.0>
-1.65892

>  <SCORE.INTRA.norm>
-0.324119

>  <SCORE.RESTR>


>  <SCORE.RESTR.norm>
0

>  <SCORE.SYSTEM>
0

>  <SCORE.SYSTEM.CONST>
0

>  <SCORE.SYSTEM.DIHEDRAL>
0

>  <SCORE.SYSTEM.norm>
0

>  <SCORE.heavy>
33

>  <SCORE.norm>
0.0516386

>  <TransFSReceptor>
receptor

>  <TransFSScore>
0.000019

$$$$

 OpenBabel01192115203D
libRbt.so/2013.1/901 2013/11/27
 30 33  0  0  0  0  0  0  0  0999 V2000
  200.6432  205.4168  247.3041 C   0  0  0  0  0  0  0  0  0  0  0  0
  200.0884  204.0006  247.3491 C   0  0  0  0  0  0  0  0  0  0  0  0
  198.6670  204.0518  247.5094 O   0  0  0  0  0  0  0  0  0  0  0  0
  198.0671  202.8419  247.5537 C   0  0  0  0  0  0  0  0  0  0  0  0
  198.6154  201.7495  247.5585 O   0  0  0  0  0  0  0  0  0  0  0  0
  196.5309  202.9943  247.7215 C   0  0  0  0  0  0  0  0  0  0  0  0
  196.1079  204.1136  247.2233 N   0  0  0  0  0  0  0  0  0  0  0  0
  194.7771  204.3812  247.2719 N   0  0  0  0  0  0  0  0  0  0  0  0
  193.8815  203.7080  248.2455 C   0  0  1  0  0  0  0  0  0  0  0  0
  194.4265  202.4237  248.7983 N   0  0  0  0  0  0  0  0  0  0  0  0
  195.7770  201.9998  248.3710 N   0  0  0  0  0  0  0  0  0  0  0  0
  196.4642  200.9490  249.1099 C   0  0  0  0  0  0  0  0  0  0  0  0
  193.4688  201.6015  249.4040 C   0  0  0  0  0  0  0  0  0  0  0  0
  192.2794  201.9486  249.4648 O   0  0  0  0  0  0  0  0  0  0  0  0
  193.7748  200.2561  250.0100 C   0  0  0  0  0  0  0  0  0  0  0  0
  193.5076  204.6632  249.3928 C   0  0  0  0  0  0  0  0  0  0  0  0
  192.1729  205.0888  249.5399 C   0  0  0  0  0  0  0  0  0  0  0  0
  191.8559  205.9032  250.6054 C   0  0  0  0  0  0  0  0  0  0  0  0
  192.8052  206.3003  251.5160 C   0  0  0  0  0  0  0  0  0  0  0  0
  194.1246  205.9148  251.4066 C   0  0  0  0  0  0  0  0  0  0  0  0
  194.4767  205.0869  250.3348 C   0  0  0  0  0  0  0  0  0  0  0  0
  192.2834  207.0895  252.4933 O   0  0  0  0  0  0  0  0  0  0  0  0
  190.8996  207.1442  252.0883 C   0  0  0  0  0  0  0  0  0  0  0  0
  190.6188  206.3951  250.8902 O   0  0  0  0  0  0  0  0  0  0  0  0
  194.3613  205.5483  246.5835 C   0  0  0  0  0  0  0  0  0  0  0  0
  195.2771  206.2926  245.8085 C   0  0  0  0  0  0  0  0  0  0  0  0
  194.9011  207.4424  245.0970 C   0  0  0  0  0  0  0  0  0  0  0  0
  193.5799  207.8727  245.1326 C   0  0  0  0  0  0  0  0  0  0  0  0
  192.6524  207.1574  245.8752 C   0  0  0  0  0  0  0  0  0  0  0  0
  193.0331  206.0138  246.5887 C   0  0  0  0  0  0  0  0  0  0  0  0
  1  2  1  0  0  0  0
  2  3  1  0  0  0  0
  3  4  1  0  0  0  0
  4  5  2  0  0  0  0
  4  6  1  0  0  0  0
  6 11  1  0  0  0  0
  6  7  2  0  0  0  0
  7  8  1  0  0  0  0
  8  9  1  0  0  0  0
  8 25  1  0  0  0  0
  9 10  1  0  0  0  0
  9 16  1  1  0  0  0
 10 11  1  0  0  0  0
 10 13  1  0  0  0  0
 11 12  1  0  0  0  0
 13 14  2  0  0  0  0
 13 15  1  0  0  0  0
 16 21  1  0  0  0  0
 16 17  2  0  0  0  0
 17 18  1  0  0  0  0
 18 24  1  0  0  0  0
 18 19  2  0  0  0  0
 19 20  1  0  0  0  0
 19 22  1  0  0  0  0
 20 21  2  0  0  0  0
 22 23  1  0  0  0  0
 23 24  1  0  0  0  0
 25 30  1  0  0  0  0
 25 26  2  0  0  0  0
 26 27  1  0  0  0  0
 27 28  2  0  0  0  0
 28 29  1  0  0  0  0
 29 30  2  0  0  0  0
M  END
>  <CHROM.1>
179.61490075,5.07684243,27.61737474,5.43481628,113.79343668,194.71290135
204.49691275,248.57578084,-0.06192541,0.58211209,-0.59028896

>  <Name>


>  <RI>
0

>  <Rbt.Current_Directory>
/data/dnb03/galaxy_db/job_working_directory/014/442/14442263/working

>  <Rbt.Executable>
rbdock ($Id: //depot/dev/client3/rdock/2013.1/src/exe/rbdock.cxx#4 $)

>  <Rbt.Library>
libRbt.so (2013.1, Build901 2013/11/27)

>  <Rbt.Parameter_File>
/usr/local/tools/_conda/envs/__rdock@2013.1-0/share/rdock-2013.1-1/data/scripts/dock.prm

>  <Rbt.Receptor>
receptor.prm

>  <SCORE>
6.44388

>  <SCORE.INTER>
10.4

>  <SCORE.INTER.CONST>
1

>  <SCORE.INTER.POLAR>
0

>  <SCORE.INTER.REPUL>
0

>  <SCORE.INTER.ROT>
5

>  <SCORE.INTER.VDW>
0

>  <SCORE.INTER.norm>
0.346667

>  <SCORE.INTRA>
-3.95612

>  <SCORE.INTRA.DIHEDRAL>
-9.6693

>  <SCORE.INTRA.DIHEDRAL.0>
12.8958

>  <SCORE.INTRA.POLAR>
0

>  <SCORE.INTRA.POLAR.0>
0

>  <SCORE.INTRA.REPUL>
0.0279043

>  <SCORE.INTRA.REPUL.0>
0

>  <SCORE.INTRA.VDW>
0.739004

>  <SCORE.INTRA.VDW.0>
-1.23554

>  <SCORE.INTRA.norm>
-0.131871

>  <SCORE.RESTR>


>  <SCORE.RESTR.norm>
0

>  <SCORE.SYSTEM>
0

>  <SCORE.SYSTEM.CONST>
0

>  <SCORE.SYSTEM.DIHEDRAL>
0

>  <SCORE.SYSTEM.norm>
0

>  <SCORE.heavy>
30

>  <SCORE.norm>
0.214796

>  <TransFSReceptor>
receptor

>  <TransFSScore>
0.000306

$$$$

 OpenBabel01192115203D
libRbt.so/2013.1/901 2013/11/27
 22 24  0  0  0  0  0  0  0  0999 V2000
  248.6557  187.2070  270.7349 C   0  0  0  0  0  0  0  0  0  0  0  0
  247.7007  188.2072  270.1085 C   0  0  0  0  0  0  0  0  0  0  0  0
  248.5540  189.3242  269.6417 N   0  0  0  0  0  0  0  0  0  0  0  0
  249.7850  188.9092  269.6858 C   0  0  0  0  0  0  0  0  0  0  0  0
  249.8915  187.5279  270.0163 N   0  3  0  0  0  0  0  0  0  0  0  0
  249.9665  187.0274  269.1249 H   0  0  0  0  0  0  0  0  0  0  0  0
  250.8461  187.3112  270.3923 H   0  0  0  0  0  0  0  0  0  0  0  0
  250.9961  189.7881  269.3590 C   0  0  0  0  0  0  0  0  0  0  0  0
  250.8683  190.6325  268.1449 N   0  0  0  0  0  0  0  0  0  0  0  0
  250.9295  189.9127  266.8758 C   0  0  0  0  0  0  0  0  0  0  0  0
  249.6742  189.1743  266.4257 C   0  0  0  0  0  0  0  0  0  0  0  0
  248.5134  189.9504  266.2396 C   0  0  0  0  0  0  0  0  0  0  0  0
  247.2500  189.4008  266.4511 C   0  0  0  0  0  0  0  0  0  0  0  0
  247.1283  188.0593  266.7946 C   0  0  0  0  0  0  0  0  0  0  0  0
  248.2592  187.2425  266.7888 C   0  0  0  0  0  0  0  0  0  0  0  0
  249.5299  187.7891  266.5844 C   0  0  0  0  0  0  0  0  0  0  0  0
  250.2417  191.8743  268.2640 C   0  0  0  0  0  0  0  0  0  0  0  0
  248.8743  192.0034  268.5530 C   0  0  0  0  0  0  0  0  0  0  0  0
  248.2592  193.2513  268.7075 C   0  0  0  0  0  0  0  0  0  0  0  0
  248.9966  194.4195  268.5715 C   0  0  0  0  0  0  0  0  0  0  0  0
  250.3456  194.3331  268.2585 C   0  0  0  0  0  0  0  0  0  0  0  0
  250.9503  193.0784  268.0964 C   0  0  0  0  0  0  0  0  0  0  0  0
  1  5  1  0  0  0  0
  1  2  1  0  0  0  0
  2  3  1  0  0  0  0
  3  4  2  0  0  0  0
  4  5  1  0  0  0  0
  4  8  1  0  0  0  0
  5  6  1  0  0  0  0
  5  7  1  0  0  0  0
  8  9  1  0  0  0  0
  9 10  1  0  0  0  0
  9 17  1  0  0  0  0
 10 11  1  0  0  0  0
 11 16  1  0  0  0  0
 11 12  2  0  0  0  0
 12 13  1  0  0  0  0
 13 14  2  0  0  0  0
 14 15  1  0  0  0  0
 15 16  2  0  0  0  0
 17 22  1  0  0  0  0
 17 18  2  0  0  0  0
 18 19  1  0  0  0  0
 19 20  2  0  0  0  0
 20 21  1  0  0  0  0
 21 22  2  0  0  0  0
M  CHG  1   5   1
M  END
>  <CHROM.1>
-44.58103243,-72.21149248,78.51227990,-67.25034951,59.74988800,249.28174289
190.05283165,268.25547806,-2.22099815,-1.21898909,-0.65083723

>  <Name>


>  <RI>
0

>  <Rbt.Current_Directory>
/data/dnb03/galaxy_db/job_working_directory/014/442/14442265/working

>  <Rbt.Executable>
rbdock ($Id: //depot/dev/client3/rdock/2013.1/src/exe/rbdock.cxx#4 $)

>  <Rbt.Library>
libRbt.so (2013.1, Build901 2013/11/27)

>  <Rbt.Parameter_File>
/usr/local/tools/_conda/envs/__rdock@2013.1-0/share/rdock-2013.1-1/data/scripts/dock.prm

>  <Rbt.Receptor>
receptor.prm

>  <SCORE>
5.65638

>  <SCORE.INTER>
10.4

>  <SCORE.INTER.CONST>
1

>  <SCORE.INTER.POLAR>
0

>  <SCORE.INTER.REPUL>
0

>  <SCORE.INTER.ROT>
5

>  <SCORE.INTER.VDW>
0

>  <SCORE.INTER.norm>
0.52

>  <SCORE.INTRA>
-4.74362

>  <SCORE.INTRA.DIHEDRAL>
-1.91223

>  <SCORE.INTRA.DIHEDRAL.0>
5.72728

>  <SCORE.INTRA.POLAR>
0

>  <SCORE.INTRA.POLAR.0>
0

>  <SCORE.INTRA.REPUL>
0

>  <SCORE.INTRA.REPUL.0>
0

>  <SCORE.INTRA.VDW>
-3.7875

>  <SCORE.INTRA.VDW.0>
-1.43082

>  <SCORE.INTRA.norm>
-0.237181

>  <SCORE.RESTR>


>  <SCORE.RESTR.norm>
0

>  <SCORE.SYSTEM>
0

>  <SCORE.SYSTEM.CONST>
0

>  <SCORE.SYSTEM.DIHEDRAL>
0

>  <SCORE.SYSTEM.norm>
0

>  <SCORE.heavy>
20

>  <SCORE.norm>
0.282819

>  <TransFSReceptor>
receptor

>  <TransFSScore>
0.003340

$$$$

 OpenBabel01192115203D
libRbt.so/2013.1/901 2013/11/27
 30 33  0  0  0  0  0  0  0  0999 V2000
  218.4361  185.0510  249.7064 C   0  0  0  0  0  0  0  0  0  0  0  0
  218.9581  184.1892  250.5868 C   0  0  0  0  0  0  0  0  0  0  0  0
  218.1618  183.2361  251.4352 C   0  0  0  0  0  0  0  0  0  0  0  0
  216.7324  183.3644  251.2117 N   0  0  0  0  0  0  0  0  0  0  0  0
  215.8241  184.1133  251.9489 C   0  0  0  0  0  0  0  0  0  0  0  0
  214.6150  183.8452  251.4750 N   0  0  0  0  0  0  0  0  0  0  0  0
  214.7190  182.9609  250.4304 N   0  0  0  0  0  0  0  0  0  0  0  0
  215.9899  182.6764  250.2803 C   0  0  0  0  0  0  0  0  0  0  0  0
  216.6370  181.5421  249.1393 S   0  0  0  0  0  0  0  0  0  0  0  0
  215.3882  181.5976  247.8037 C   0  0  0  0  0  0  0  0  0  0  0  0
  215.3416  182.9580  247.1116 C   0  0  0  0  0  0  0  0  0  0  0  0
  215.8761  183.1487  246.0212 O   0  0  0  0  0  0  0  0  0  0  0  0
  214.6229  183.9235  247.8270 N   0  0  0  0  0  0  0  0  0  0  0  0
  214.4226  185.2642  247.4112 C   0  0  0  0  0  0  0  0  0  0  0  0
  213.7768  186.1586  248.2858 C   0  0  0  0  0  0  0  0  0  0  0  0
  213.6632  187.5140  247.9475 C   0  0  0  0  0  0  0  0  0  0  0  0
  214.1760  187.9834  246.7365 C   0  0  0  0  0  0  0  0  0  0  0  0
  214.7387  187.0935  245.8350 C   0  0  0  0  0  0  0  0  0  0  0  0
  214.8552  185.7450  246.1744 C   0  0  0  0  0  0  0  0  0  0  0  0
  214.1689  189.3015  246.3625 O   0  0  0  0  0  0  0  0  0  0  0  0
  213.9773  190.1477  247.4980 C   0  0  0  0  0  0  0  0  0  0  0  0
  212.8039  189.6498  248.3259 C   0  0  0  0  0  0  0  0  0  0  0  0
  213.0615  188.3448  248.8672 O   0  0  0  0  0  0  0  0  0  0  0  0
  216.0680  185.0107  253.0930 C   0  0  0  0  0  0  0  0  0  0  0  0
  214.9885  185.6521  253.7022 C   0  0  0  0  0  0  0  0  0  0  0  0
  215.0776  186.5071  254.7580 N   0  0  0  0  0  0  0  0  0  0  0  0
  216.3107  186.7627  255.2315 C   0  0  0  0  0  0  0  0  0  0  0  0
  217.4552  186.2018  254.6998 C   0  0  0  0  0  0  0  0  0  0  0  0
  217.3246  185.3263  253.6184 C   0  0  0  0  0  0  0  0  0  0  0  0
  214.3370  183.6929  248.7693 H   0  0  0  0  0  0  0  0  0  0  0  0
  1  2  2  0  0  0  0
  2  3  1  0  0  0  0
  3  4  1  0  0  0  0
  4  8  1  0  0  0  0
  4  5  1  0  0  0  0
  5  6  2  0  0  0  0
  5 24  1  0  0  0  0
  6  7  1  0  0  0  0
  7  8  2  0  0  0  0
  8  9  1  0  0  0  0
  9 10  1  0  0  0  0
 10 11  1  0  0  0  0
 11 12  2  0  0  0  0
 11 13  1  0  0  0  0
 13 14  1  0  0  0  0
 13 30  1  0  0  0  0
 14 19  1  0  0  0  0
 14 15  2  0  0  0  0
 15 16  1  0  0  0  0
 16 23  1  0  0  0  0
 16 17  2  0  0  0  0
 17 18  1  0  0  0  0
 17 20  1  0  0  0  0
 18 19  2  0  0  0  0
 20 21  1  0  0  0  0
 21 22  1  0  0  0  0
 22 23  1  0  0  0  0
 24 29  1  0  0  0  0
 24 25  2  0  0  0  0
 25 26  1  0  0  0  0
 26 27  2  0  0  0  0
 27 28  1  0  0  0  0
 28 29  2  0  0  0  0
M  END
>  <CHROM.1>
-0.94198569,-95.74070030,-178.90865876,-155.36532825,65.62211341,101.44209078
-174.54696361,215.48940505,185.20433223,249.70171157,-0.46229233,1.13709678
-2.12188941

>  <Name>


>  <RI>
0

>  <Rbt.Current_Directory>
/data/dnb03/galaxy_db/job_working_directory/014/442/14442266/working

>  <Rbt.Executable>
rbdock ($Id: //depot/dev/client3/rdock/2013.1/src/exe/rbdock.cxx#4 $)

>  <Rbt.Library>
libRbt.so (2013.1, Build901 2013/11/27)

>  <Rbt.Parameter_File>
/usr/local/tools/_conda/envs/__rdock@2013.1-0/share/rdock-2013.1-1/data/scripts/dock.prm

>  <Rbt.Receptor>
receptor.prm

>  <SCORE>
6.91496

>  <SCORE.INTER>
12.4

>  <SCORE.INTER.CONST>
1

>  <SCORE.INTER.POLAR>
0

>  <SCORE.INTER.REPUL>
0

>  <SCORE.INTER.ROT>
7

>  <SCORE.INTER.VDW>
0

>  <SCORE.INTER.norm>
0.427586

>  <SCORE.INTRA>
-5.48504

>  <SCORE.INTRA.DIHEDRAL>
-3.49129

>  <SCORE.INTRA.DIHEDRAL.0>
7.8493

>  <SCORE.INTRA.POLAR>
-1

>  <SCORE.INTRA.POLAR.0>
0

>  <SCORE.INTRA.REPUL>
0

>  <SCORE.INTRA.REPUL.0>
0

>  <SCORE.INTRA.VDW>
-0.339393

>  <SCORE.INTRA.VDW.0>
-2.67562

>  <SCORE.INTRA.norm>
-0.189139

>  <SCORE.RESTR>


>  <SCORE.RESTR.norm>
0

>  <SCORE.SYSTEM>
0

>  <SCORE.SYSTEM.CONST>
0

>  <SCORE.SYSTEM.DIHEDRAL>
0

>  <SCORE.SYSTEM.norm>
0

>  <SCORE.heavy>
29

>  <SCORE.norm>
0.238447

>  <TransFSReceptor>
receptor

>  <TransFSScore>
0.000004

$$$$

 OpenBabel01192115203D
libRbt.so/2013.1/901 2013/11/27
 33 35  0  0  0  0  0  0  0  0999 V2000
  187.2012  215.0747  269.7957 C   0  0  0  0  0  0  0  0  0  0  0  0
  185.8920  214.5485  270.3065 C   0  0  0  0  0  0  0  0  0  0  0  0
  184.8262  215.3035  270.6626 C   0  0  0  0  0  0  0  0  0  0  0  0
  183.7476  214.7147  271.3137 N   0  0  0  0  0  0  0  0  0  0  0  0
  184.1488  213.5950  272.2067 C   0  0  1  0  0  0  0  0  0  0  0  0
  182.7358  212.9243  271.9390 C   0  0  1  0  0  0  0  0  0  0  0  0
  182.8174  213.9209  270.6632 C   0  0  0  0  0  0  0  0  0  0  0  0
  182.3471  214.0629  269.5619 O   0  0  0  0  0  0  0  0  0  0  0  0
  182.8892  211.4571  271.7335 N   0  0  0  0  0  0  0  0  0  0  0  0
  182.1467  210.7137  270.8506 C   0  0  0  0  0  0  0  0  0  0  0  0
  181.4052  209.8028  271.2171 O   0  0  0  0  0  0  0  0  0  0  0  0
  182.2395  211.1089  269.3696 C   0  0  1  0  0  0  0  0  0  0  0  0
  183.4137  210.4297  268.6745 C   0  0  0  0  0  0  0  0  0  0  0  0
  184.3878  211.2121  268.0302 C   0  0  0  0  0  0  0  0  0  0  0  0
  185.4733  210.6140  267.3834 C   0  0  0  0  0  0  0  0  0  0  0  0
  185.5914  209.2296  267.3822 C   0  0  0  0  0  0  0  0  0  0  0  0
  184.6458  208.4370  268.0189 C   0  0  0  0  0  0  0  0  0  0  0  0
  183.5626  209.0320  268.6690 C   0  0  0  0  0  0  0  0  0  0  0  0
  186.6332  208.6024  266.7674 O   0  0  0  0  0  0  0  0  0  0  0  0
  180.9368  210.9606  268.5970 C   0  0  0  0  0  0  0  0  0  0  0  0
  180.4926  209.8931  268.1977 O   0  0  0  0  0  0  0  0  0  0  0  0
  180.3073  212.1297  268.3310 O   0  0  0  0  0  0  0  0  0  0  0  0
  181.6647  213.2900  272.8606 O   0  0  0  0  0  0  0  0  0  0  0  0
  180.3351  212.9857  272.4562 C   0  0  0  0  0  0  0  0  0  0  0  0
  185.3137  212.8176  271.8223 O   0  0  0  0  0  0  0  0  0  0  0  0
  185.8022  213.0623  270.5051 C   0  0  0  0  0  0  0  0  0  0  0  0
  184.8277  216.8039  270.5327 C   0  0  0  0  0  0  0  0  0  0  0  0
  185.7165  217.4647  270.0232 O   0  0  0  0  0  0  0  0  0  0  0  0
  183.7320  217.3682  271.0902 O   0  0  0  0  0  0  0  0  0  0  0  0
  183.3243  210.9478  272.4990 H   0  0  0  0  0  0  0  0  0  0  0  0
  187.2183  209.2727  266.3772 H   0  0  0  0  0  0  0  0  0  0  0  0
  180.7560  212.9260  268.6797 H   0  0  0  0  0  0  0  0  0  0  0  0
  183.1288  216.7021  271.4694 H   0  0  0  0  0  0  0  0  0  0  0  0
  1  2  1  0  0  0  0
  2 26  1  0  0  0  0
  2  3  2  0  0  0  0
  3  4  1  0  0  0  0
  3 27  1  0  0  0  0
  4  7  1  0  0  0  0
  4  5  1  0  0  0  0
  5  6  1  0  0  0  0
  5 25  1  6  0  0  0
  6  7  1  0  0  0  0
  6  9  1  0  0  0  0
  6 23  1  1  0  0  0
  7  8  2  0  0  0  0
  9 10  1  0  0  0  0
  9 30  1  0  0  0  0
 10 11  2  0  0  0  0
 12 10  1  1  0  0  0
 12 13  1  0  0  0  0
 12 20  1  0  0  0  0
 13 18  1  0  0  0  0
 13 14  2  0  0  0  0
 14 15  1  0  0  0  0
 15 16  2  0  0  0  0
 16 17  1  0  0  0  0
 16 19  1  0  0  0  0
 17 18  2  0  0  0  0
 19 31  1  0  0  0  0
 20 21  2  0  0  0  0
 20 22  1  0  0  0  0
 22 32  1  0  0  0  0
 23 24  1  0  0  0  0
 25 26  1  0  0  0  0
 27 28  2  0  0  0  0
 27 29  1  0  0  0  0
 29 33  1  0  0  0  0
M  END
>  <CHROM.1>
5.41295089,-143.63379601,164.42883477,-117.62955250,86.64028413,-123.32447150
-77.46410564,0.44900958,-1.00326495,-0.65067034,183.59543224,212.50463393
269.98418077,-1.40816436,-0.40291795,-2.65711489

>  <Name>


>  <RI>
0

>  <Rbt.Current_Directory>
/data/dnb03/galaxy_db/job_working_directory/014/442/14442267/working

>  <Rbt.Executable>
rbdock ($Id: //depot/dev/client3/rdock/2013.1/src/exe/rbdock.cxx#4 $)

>  <Rbt.Library>
libRbt.so (2013.1, Build901 2013/11/27)

>  <Rbt.Parameter_File>
/usr/local/tools/_conda/envs/__rdock@2013.1-0/share/rdock-2013.1-1/data/scripts/dock.prm

>  <Rbt.Receptor>
receptor.prm

>  <SCORE>
6.54678

>  <SCORE.INTER>
12.4

>  <SCORE.INTER.CONST>
1

>  <SCORE.INTER.POLAR>
0

>  <SCORE.INTER.REPUL>
0

>  <SCORE.INTER.ROT>
7

>  <SCORE.INTER.VDW>
0

>  <SCORE.INTER.norm>
0.427586

>  <SCORE.INTRA>
-5.85322

>  <SCORE.INTRA.DIHEDRAL>
-0.881637

>  <SCORE.INTRA.DIHEDRAL.0>
5.78257

>  <SCORE.INTRA.POLAR>
-1.05172

>  <SCORE.INTRA.POLAR.0>
-0.267621

>  <SCORE.INTRA.REPUL>
0

>  <SCORE.INTRA.REPUL.0>
0

>  <SCORE.INTRA.VDW>
-1.83654

>  <SCORE.INTRA.VDW.0>
-2.60219

>  <SCORE.INTRA.norm>
-0.201835

>  <SCORE.RESTR>


>  <SCORE.RESTR.norm>
0

>  <SCORE.SYSTEM>
0

>  <SCORE.SYSTEM.CONST>
0

>  <SCORE.SYSTEM.DIHEDRAL>
0

>  <SCORE.SYSTEM.norm>
0

>  <SCORE.heavy>
29

>  <SCORE.norm>
0.225751

>  <TransFSReceptor>
receptor

>  <TransFSScore>
0.070704

$$$$

 OpenBabel01192115203D
libRbt.so/2013.1/901 2013/11/27
 27 29  0  0  0  0  0  0  0  0999 V2000
  185.9169  203.5590  251.5677 C   0  0  0  0  0  0  0  0  0  0  0  0
  186.1052  204.9882  251.1399 C   0  0  0  0  0  0  0  0  0  0  0  0
  187.1829  205.3864  250.3302 C   0  0  0  0  0  0  0  0  0  0  0  0
  187.2477  206.7125  249.8740 C   0  0  0  0  0  0  0  0  0  0  0  0
  186.2800  207.6481  250.2468 C   0  0  0  0  0  0  0  0  0  0  0  0
  185.2275  207.2551  251.0687 C   0  0  0  0  0  0  0  0  0  0  0  0
  185.1385  205.9366  251.5160 C   0  0  0  0  0  0  0  0  0  0  0  0
  183.7567  208.6228  251.6120 I   0  0  0  0  0  0  0  0  0  0  0  0
  188.1954  204.4494  250.0155 N   0  0  0  0  0  0  0  0  0  0  0  0
  188.0173  203.4054  249.1314 C   0  0  0  0  0  0  0  0  0  0  0  0
  187.5680  203.5597  247.9925 O   0  0  0  0  0  0  0  0  0  0  0  0
  188.6174  202.0312  249.5654 C   0  0  2  0  0  0  0  0  0  0  0  0
  187.9042  200.9356  248.7443 C   0  0  0  0  0  0  0  0  0  0  0  0
  188.4750  199.6426  249.2985 C   0  0  0  0  0  0  0  0  0  0  0  0
  188.7141  199.9553  250.7701 C   0  0  0  0  0  0  0  0  0  0  0  0
  188.5822  201.4051  250.9057 N   0  0  0  0  0  0  0  0  0  0  0  0
  188.9011  202.0277  252.0964 C   0  0  0  0  0  0  0  0  0  0  0  0
  188.4637  201.6601  253.1812 O   0  0  0  0  0  0  0  0  0  0  0  0
  189.7789  203.0565  251.9286 O   0  0  0  0  0  0  0  0  0  0  0  0
  190.0863  203.8578  253.0838 C   0  0  0  0  0  0  0  0  0  0  0  0
  188.9333  204.7621  253.4745 C   0  0  0  0  0  0  0  0  0  0  0  0
  188.8659  206.0802  252.9976 C   0  0  0  0  0  0  0  0  0  0  0  0
  187.8441  206.9451  253.4060 C   0  0  0  0  0  0  0  0  0  0  0  0
  186.8757  206.5018  254.3027 C   0  0  0  0  0  0  0  0  0  0  0  0
  186.9301  205.1983  254.7910 C   0  0  0  0  0  0  0  0  0  0  0  0
  187.9530  204.3346  254.3801 C   0  0  0  0  0  0  0  0  0  0  0  0
  188.9343  204.3201  250.7048 H   0  0  0  0  0  0  0  0  0  0  0  0
  1  2  1  0  0  0  0
  2  7  1  0  0  0  0
  2  3  2  0  0  0  0
  3  4  1  0  0  0  0
  3  9  1  0  0  0  0
  4  5  2  0  0  0  0
  5  6  1  0  0  0  0
  6  7  2  0  0  0  0
  6  8  1  0  0  0  0
  9 10  1  0  0  0  0
  9 27  1  0  0  0  0
 10 11  2  0  0  0  0
 12 10  1  1  0  0  0
 12 16  1  0  0  0  0
 12 13  1  0  0  0  0
 13 14  1  0  0  0  0
 14 15  1  0  0  0  0
 15 16  1  0  0  0  0
 16 17  1  0  0  0  0
 17 18  2  0  0  0  0
 17 19  1  0  0  0  0
 19 20  1  0  0  0  0
 20 21  1  0  0  0  0
 21 26  1  0  0  0  0
 21 22  2  0  0  0  0
 22 23  1  0  0  0  0
 23 24  2  0  0  0  0
 24 25  1  0  0  0  0
 25 26  2  0  0  0  0
M  END
>  <CHROM.1>
72.91093824,51.28869224,160.09041498,155.31929780,174.33481145,-72.74506162
-93.47769810,186.68754844,205.23660818,251.46326249,0.56384790,0.84034234
-2.14738641

>  <Name>


>  <RI>
0

>  <Rbt.Current_Directory>
/data/dnb03/galaxy_db/job_working_directory/014/442/14442268/working

>  <Rbt.Executable>
rbdock ($Id: //depot/dev/client3/rdock/2013.1/src/exe/rbdock.cxx#4 $)

>  <Rbt.Library>
libRbt.so (2013.1, Build901 2013/11/27)

>  <Rbt.Parameter_File>
/usr/local/tools/_conda/envs/__rdock@2013.1-0/share/rdock-2013.1-1/data/scripts/dock.prm

>  <Rbt.Receptor>
receptor.prm

>  <SCORE>
2.33117

>  <SCORE.INTER>
12.4

>  <SCORE.INTER.CONST>
1

>  <SCORE.INTER.POLAR>
0

>  <SCORE.INTER.REPUL>
0

>  <SCORE.INTER.ROT>
7

>  <SCORE.INTER.VDW>
0

>  <SCORE.INTER.norm>
0.476923

>  <SCORE.INTRA>
-10.0688

>  <SCORE.INTRA.DIHEDRAL>
-5.83595

>  <SCORE.INTRA.DIHEDRAL.0>
10.4339

>  <SCORE.INTRA.POLAR>
-0.115254

>  <SCORE.INTRA.POLAR.0>
-0.787388

>  <SCORE.INTRA.REPUL>
0

>  <SCORE.INTRA.REPUL.0>
0

>  <SCORE.INTRA.VDW>
-6.75899

>  <SCORE.INTRA.VDW.0>
0.148247

>  <SCORE.INTRA.norm>
-0.387263

>  <SCORE.RESTR>


>  <SCORE.RESTR.norm>
0

>  <SCORE.SYSTEM>
0

>  <SCORE.SYSTEM.CONST>
0

>  <SCORE.SYSTEM.DIHEDRAL>
0

>  <SCORE.SYSTEM.norm>
0

>  <SCORE.heavy>
26

>  <SCORE.norm>
0.0896604

>  <TransFSReceptor>
receptor

>  <TransFSScore>
0.000687

$$$$

 OpenBabel01192115203D
libRbt.so/2013.1/901 2013/11/27
 28 30  0  0  0  0  0  0  0  0999 V2000
  187.5735  217.7793  249.0384 C   0  0  0  0  0  0  0  0  0  0  0  0
  187.2381  216.3401  248.7919 C   0  0  0  0  0  0  0  0  0  0  0  0
  186.0982  215.8928  248.7647 O   0  0  0  0  0  0  0  0  0  0  0  0
  188.3715  215.6282  248.5657 O   0  0  0  0  0  0  0  0  0  0  0  0
  188.2037  214.2404  248.1979 C   0  0  2  0  0  0  0  0  0  0  0  0
  189.4592  213.4404  248.5755 C   0  0  1  0  0  0  0  0  0  0  0  0
  190.6392  213.7557  247.6423 C   0  0  2  0  0  0  0  0  0  0  0  0
  190.2836  213.4614  246.1554 C   0  0  2  0  0  0  0  0  0  0  0  0
  188.9299  214.0302  245.7570 C   0  0  0  0  0  0  0  0  0  0  0  0
  188.6579  214.2432  244.3921 C   0  0  0  0  0  0  0  0  0  0  0  0
  187.4055  214.6813  243.9710 C   0  0  0  0  0  0  0  0  0  0  0  0
  186.4032  214.9010  244.9059 C   0  0  0  0  0  0  0  0  0  0  0  0
  186.6624  214.7126  246.2644 C   0  0  0  0  0  0  0  0  0  0  0  0
  187.9295  214.2903  246.7076 C   0  0  0  0  0  0  0  0  0  0  0  0
  190.3852  211.9907  245.7182 C   0  0  0  0  0  0  0  0  0  0  0  0
  191.4421  211.5910  244.8815 C   0  0  0  0  0  0  0  0  0  0  0  0
  191.5558  210.2668  244.4485 C   0  0  0  0  0  0  0  0  0  0  0  0
  190.6267  209.3140  244.8574 C   0  0  0  0  0  0  0  0  0  0  0  0
  189.5647  209.6923  245.6677 C   0  0  0  0  0  0  0  0  0  0  0  0
  189.4308  211.0230  246.0702 C   0  0  0  0  0  0  0  0  0  0  0  0
  191.9124  213.0191  248.0228 C   0  0  0  0  0  0  0  0  0  0  0  0
  193.0032  213.5454  248.1959 O   0  0  0  0  0  0  0  0  0  0  0  0
  191.6618  211.6820  248.1399 O   0  0  0  0  0  0  0  0  0  0  0  0
  192.7965  210.8844  248.4854 C   0  0  0  0  0  0  0  0  0  0  0  0
  189.7426  213.6970  250.0395 C   0  0  0  0  0  0  0  0  0  0  0  0
  189.5533  212.8930  250.9436 O   0  0  0  0  0  0  0  0  0  0  0  0
  190.3254  214.9227  250.1707 O   0  0  0  0  0  0  0  0  0  0  0  0
  190.6210  215.3324  251.5073 C   0  0  0  0  0  0  0  0  0  0  0  0
  1  2  1  0  0  0  0
  2  3  2  0  0  0  0
  2  4  1  0  0  0  0
  5  4  1  6  0  0  0
  5 14  1  0  0  0  0
  5  6  1  0  0  0  0
  6  7  1  0  0  0  0
  6 25  1  1  0  0  0
  7  8  1  0  0  0  0
  7 21  1  1  0  0  0
  8  9  1  0  0  0  0
  8 15  1  1  0  0  0
  9 14  1  0  0  0  0
  9 10  2  0  0  0  0
 10 11  1  0  0  0  0
 11 12  2  0  0  0  0
 12 13  1  0  0  0  0
 13 14  2  0  0  0  0
 15 20  1  0  0  0  0
 15 16  2  0  0  0  0
 16 17  1  0  0  0  0
 17 18  2  0  0  0  0
 18 19  1  0  0  0  0
 19 20  2  0  0  0  0
 21 22  2  0  0  0  0
 21 23  1  0  0  0  0
 23 24  1  0  0  0  0
 25 26  2  0  0  0  0
 25 27  1  0  0  0  0
 27 28  1  0  0  0  0
M  END
>  <CHROM.1>
-174.87756216,-155.01911301,106.63170768,-127.80920805,-107.51551328,179.49022438
178.21161716,189.54733590,213.51446864,247.43621798,2.27320298,-0.68581535
1.02911934

>  <Name>


>  <RI>
0

>  <Rbt.Current_Directory>
/data/dnb03/galaxy_db/job_working_directory/014/442/14442269/working

>  <Rbt.Executable>
rbdock ($Id: //depot/dev/client3/rdock/2013.1/src/exe/rbdock.cxx#4 $)

>  <Rbt.Library>
libRbt.so (2013.1, Build901 2013/11/27)

>  <Rbt.Parameter_File>
/usr/local/tools/_conda/envs/__rdock@2013.1-0/share/rdock-2013.1-1/data/scripts/dock.prm

>  <Rbt.Receptor>
receptor.prm

>  <SCORE>
9.97702

>  <SCORE.INTER>
12.4

>  <SCORE.INTER.CONST>
1

>  <SCORE.INTER.POLAR>
0

>  <SCORE.INTER.REPUL>
0

>  <SCORE.INTER.ROT>
7

>  <SCORE.INTER.VDW>
0

>  <SCORE.INTER.norm>
0.442857

>  <SCORE.INTRA>
-2.42298

>  <SCORE.INTRA.DIHEDRAL>
-5.72906

>  <SCORE.INTRA.DIHEDRAL.0>
11.068

>  <SCORE.INTRA.POLAR>
0

>  <SCORE.INTRA.POLAR.0>
0

>  <SCORE.INTRA.REPUL>
0.000190422

>  <SCORE.INTRA.REPUL.0>
0

>  <SCORE.INTRA.VDW>
0.4406

>  <SCORE.INTRA.VDW.0>
-2.37329

>  <SCORE.INTRA.norm>
-0.0865349

>  <SCORE.RESTR>


>  <SCORE.RESTR.norm>
0

>  <SCORE.SYSTEM>
0

>  <SCORE.SYSTEM.CONST>
0

>  <SCORE.SYSTEM.DIHEDRAL>
0

>  <SCORE.SYSTEM.norm>
0

>  <SCORE.heavy>
28

>  <SCORE.norm>
0.356322

>  <TransFSReceptor>
receptor

>  <TransFSScore>
0.024070

$$$$

 OpenBabel01192115203D
libRbt.so/2013.1/901 2013/11/27
 25 26  0  0  0  0  0  0  0  0999 V2000
  202.5069  210.8262  256.9394 C   0  0  0  0  0  0  0  0  0  0  0  0
  203.2591  211.5702  255.8408 C   0  0  1  0  0  0  0  0  0  0  0  0
  204.7461  211.2519  255.9597 C   0  0  0  0  0  0  0  0  0  0  0  0
  205.1547  210.1285  255.6606 O   0  0  0  0  0  0  0  0  0  0  0  0
  205.5553  212.3072  256.3317 N   0  0  0  0  0  0  0  0  0  0  0  0
  206.1655  213.1448  255.3968 C   0  0  0  0  0  0  0  0  0  0  0  0
  205.5859  214.3516  255.2465 N   0  0  0  0  0  0  0  0  0  0  0  0
  206.2392  215.2472  254.4646 C   0  0  0  0  0  0  0  0  0  0  0  0
  207.4068  214.9662  253.7725 C   0  0  0  0  0  0  0  0  0  0  0  0
  207.9299  213.6844  253.8613 C   0  0  0  0  0  0  0  0  0  0  0  0
  207.3022  212.7572  254.6918 C   0  0  0  0  0  0  0  0  0  0  0  0
  208.1990  216.1738  252.8481 Cl  0  0  0  0  0  0  0  0  0  0  0  0
  202.5416  211.1212  254.2225 S   0  0  0  0  0  0  0  0  0  0  0  0
  203.3725  212.2953  253.1703 C   0  0  0  0  0  0  0  0  0  0  0  0
  204.6179  212.0695  252.5749 C   0  0  0  0  0  0  0  0  0  0  0  0
  205.2201  213.1215  251.8731 C   0  0  0  0  0  0  0  0  0  0  0  0
  204.5773  214.3608  251.7856 C   0  0  0  0  0  0  0  0  0  0  0  0
  203.3327  214.4801  252.3883 C   0  0  0  0  0  0  0  0  0  0  0  0
  202.7251  213.4834  253.0742 N   0  0  0  0  0  0  0  0  0  0  0  0
  205.1792  215.5435  251.0847 C   0  0  0  0  0  0  0  0  0  0  0  0
  204.4507  215.9677  250.0172 F   0  0  0  0  0  0  0  0  0  0  0  0
  205.3201  216.6192  251.9008 F   0  0  0  0  0  0  0  0  0  0  0  0
  206.4281  215.2777  250.6089 F   0  0  0  0  0  0  0  0  0  0  0  0
  205.4630  210.5711  252.6711 Cl  0  0  0  0  0  0  0  0  0  0  0  0
  206.1202  212.1536  257.1612 H   0  0  0  0  0  0  0  0  0  0  0  0
  2  1  1  1  0  0  0
  2  3  1  0  0  0  0
  2 13  1  0  0  0  0
  3  4  2  0  0  0  0
  3  5  1  0  0  0  0
  5  6  1  0  0  0  0
  5 25  1  0  0  0  0
  6 11  1  0  0  0  0
  6  7  2  0  0  0  0
  7  8  1  0  0  0  0
  8  9  2  0  0  0  0
  9 10  1  0  0  0  0
  9 12  1  0  0  0  0
 10 11  2  0  0  0  0
 13 14  1  0  0  0  0
 14 19  1  0  0  0  0
 14 15  2  0  0  0  0
 15 16  1  0  0  0  0
 15 24  1  0  0  0  0
 16 17  2  0  0  0  0
 17 18  1  0  0  0  0
 17 20  1  0  0  0  0
 18 19  2  0  0  0  0
 20 21  1  0  0  0  0
 20 22  1  0  0  0  0
 20 23  1  0  0  0  0
M  END
>  <CHROM.1>
71.13164149,170.80441240,-91.31532388,103.26799091,87.70830113,117.48618776
205.20081036,213.35324740,253.46430100,-2.06204016,-0.52200774,-0.86810376

>  <Name>


>  <RI>
0

>  <Rbt.Current_Directory>
/data/dnb03/galaxy_db/job_working_directory/014/442/14442270/working

>  <Rbt.Executable>
rbdock ($Id: //depot/dev/client3/rdock/2013.1/src/exe/rbdock.cxx#4 $)

>  <Rbt.Library>
libRbt.so (2013.1, Build901 2013/11/27)

>  <Rbt.Parameter_File>
/usr/local/tools/_conda/envs/__rdock@2013.1-0/share/rdock-2013.1-1/data/scripts/dock.prm

>  <Rbt.Receptor>
receptor.prm

>  <SCORE>
6.06373

>  <SCORE.INTER>
11.4

>  <SCORE.INTER.CONST>
1

>  <SCORE.INTER.POLAR>
0

>  <SCORE.INTER.REPUL>
0

>  <SCORE.INTER.ROT>
6

>  <SCORE.INTER.VDW>
0

>  <SCORE.INTER.norm>
0.475

>  <SCORE.INTRA>
-5.33627

>  <SCORE.INTRA.DIHEDRAL>
0.859825

>  <SCORE.INTRA.DIHEDRAL.0>
5.07938

>  <SCORE.INTRA.POLAR>
0

>  <SCORE.INTRA.POLAR.0>
0

>  <SCORE.INTRA.REPUL>
-0.0819081

>  <SCORE.INTRA.REPUL.0>
0.0819081

>  <SCORE.INTRA.VDW>
-5.35664

>  <SCORE.INTRA.VDW.0>
-2.68795

>  <SCORE.INTRA.norm>
-0.222345

>  <SCORE.RESTR>


>  <SCORE.RESTR.norm>
0

>  <SCORE.SYSTEM>
0

>  <SCORE.SYSTEM.CONST>
0

>  <SCORE.SYSTEM.DIHEDRAL>
0

>  <SCORE.SYSTEM.norm>
0

>  <SCORE.heavy>
24

>  <SCORE.norm>
0.252655

>  <TransFSReceptor>
receptor

>  <TransFSScore>
0.000256

$$$$

 OpenBabel01192115203D
libRbt.so/2013.1/901 2013/11/27
 59 61  0  0  0  0  0  0  0  0999 V2000
  218.7909  189.2203  248.4574 C   0  0  0  0  0  0  0  0  0  0  0  0
  219.9900  189.9730  247.8417 C   0  0  0  0  0  0  0  0  0  0  0  0
  219.5911  191.4565  247.7543 C   0  0  0  0  0  0  0  0  0  0  0  0
  221.2530  189.7759  248.7275 C   0  0  0  0  0  0  0  0  0  0  0  0
  221.9903  188.5295  248.6601 O   0  0  0  0  0  0  0  0  0  0  0  0
  223.1908  188.4716  249.7647 P   0  0  1  0  0  0  0  0  0  0  0  0
  224.0458  187.2441  249.6628 O   0  0  0  0  0  0  0  0  0  0  0  0
  224.0547  189.7581  249.3461 O   0  0  0  0  0  0  0  0  0  0  0  0
  222.7284  188.7834  251.3212 O   0  0  0  0  0  0  0  0  0  0  0  0
  221.5759  187.5183  251.5751 P   0  0  1  0  0  0  0  0  0  0  0  0
  222.6913  186.6127  252.1159 O   0  0  0  0  0  0  0  0  0  0  0  0
  221.0753  188.2525  252.9505 O   0  0  0  0  0  0  0  0  0  0  0  0
  220.4235  186.2533  251.8289 O   0  0  0  0  0  0  0  0  0  0  0  0
  219.9910  185.6295  250.6252 C   0  0  0  0  0  0  0  0  0  0  0  0
  221.1606  185.2579  249.7259 C   0  0  1  0  0  0  0  0  0  0  0  0
  222.0258  184.0779  250.1629 C   0  0  2  0  0  0  0  0  0  0  0  0
  222.6753  183.6752  248.8385 C   0  0  1  0  0  0  0  0  0  0  0  0
  221.5761  183.9917  247.8066 C   0  0  1  0  0  0  0  0  0  0  0  0
  220.7041  184.9829  248.3886 O   0  0  0  0  0  0  0  0  0  0  0  0
  222.0512  184.4858  246.5334 N   0  0  0  0  0  0  0  0  0  0  0  0
  221.9479  183.8527  245.3213 C   0  0  0  0  0  0  0  0  0  0  0  0
  222.5035  184.5402  244.3485 N   0  0  0  0  0  0  0  0  0  0  0  0
  223.0254  185.6560  244.9690 C   0  0  0  0  0  0  0  0  0  0  0  0
  223.7777  186.7414  244.4851 C   0  0  0  0  0  0  0  0  0  0  0  0
  224.1209  187.7210  245.3480 N   0  0  0  0  0  0  0  0  0  0  0  0
  223.7503  187.5954  246.6416 C   0  0  0  0  0  0  0  0  0  0  0  0
  223.0506  186.5974  247.2253 N   0  0  0  0  0  0  0  0  0  0  0  0
  222.7261  185.6571  246.3228 C   0  0  0  0  0  0  0  0  0  0  0  0
  224.1844  186.8505  243.1600 N   0  0  0  0  0  0  0  0  0  0  0  0
  223.8966  184.4071  248.6810 O   0  0  0  0  0  0  0  0  0  0  0  0
  221.2732  183.0018  250.7220 O   0  0  0  0  0  0  0  0  0  0  0  0
  222.2990  181.7407  251.3137 P   0  0  0  0  0  0  0  0  0  0  0  0
  221.2715  181.2976  252.3522 O   0  0  0  0  0  0  0  0  0  0  0  0
  221.9761  180.8466  249.9986 O   0  0  0  0  0  0  0  0  0  0  0  0
  223.3248  180.4795  251.9053 O   0  0  0  0  0  0  0  0  0  0  0  0
  220.2540  189.3790  246.4020 C   0  0  1  0  0  0  0  0  0  0  0  0
  221.4315  190.0135  245.6157 C   0  0  0  0  0  0  0  0  0  0  0  0
  222.0818  190.9762  246.0003 O   0  0  0  0  0  0  0  0  0  0  0  0
  221.6922  189.3964  244.4019 N   0  0  0  0  0  0  0  0  0  0  0  0
  222.7822  189.8168  243.5419 C   0  0  0  0  0  0  0  0  0  0  0  0
  222.3272  190.5542  242.2845 C   0  0  0  0  0  0  0  0  0  0  0  0
  221.5864  189.6377  241.3389 C   0  0  0  0  0  0  0  0  0  0  0  0
  220.3749  189.7116  241.1618 O   0  0  0  0  0  0  0  0  0  0  0  0
  222.3992  188.7412  240.6816 N   0  0  0  0  0  0  0  0  0  0  0  0
  221.8860  187.7960  239.7036 C   0  0  0  0  0  0  0  0  0  0  0  0
  222.0166  186.3412  240.1555 C   0  0  0  0  0  0  0  0  0  0  0  0
  221.2759  186.0788  241.8005 S   0  0  0  0  0  0  0  0  0  0  0  0
  220.4377  187.9525  246.4505 O   0  0  0  0  0  0  0  0  0  0  0  0
  224.8087  189.9417  249.9434 H   0  0  0  0  0  0  0  0  0  0  0  0
  220.3917  188.8930  252.6547 H   0  0  0  0  0  0  0  0  0  0  0  0
  224.6570  187.7210  242.9452 H   0  0  0  0  0  0  0  0  0  0  0  0
  224.5769  185.9913  242.8006 H   0  0  0  0  0  0  0  0  0  0  0  0
  223.7281  185.3651  248.6946 H   0  0  0  0  0  0  0  0  0  0  0  0
  221.0671  181.0323  249.7045 H   0  0  0  0  0  0  0  0  0  0  0  0
  223.9143  180.2910  251.1464 H   0  0  0  0  0  0  0  0  0  0  0  0
  221.0074  188.7195  244.0698 H   0  0  0  0  0  0  0  0  0  0  0  0
  223.3960  188.7316  240.8670 H   0  0  0  0  0  0  0  0  0  0  0  0
  222.2480  186.6788  242.5005 H   0  0  0  0  0  0  0  0  0  0  0  0
  221.1430  187.7702  247.0986 H   0  0  0  0  0  0  0  0  0  0  0  0
  1  2  1  0  0  0  0
  2  3  1  0  0  0  0
  2  4  1  0  0  0  0
  2 36  1  0  0  0  0
  4  5  1  0  0  0  0
  5  6  1  0  0  0  0
  6  7  2  6  0  0  0
  6  8  1  0  0  0  0
  6  9  1  0  0  0  0
  8 49  1  0  0  0  0
  9 10  1  0  0  0  0
 10 11  2  1  0  0  0
 10 12  1  0  0  0  0
 10 13  1  0  0  0  0
 12 50  1  0  0  0  0
 13 14  1  0  0  0  0
 15 14  1  1  0  0  0
 15 19  1  0  0  0  0
 15 16  1  0  0  0  0
 16 17  1  0  0  0  0
 16 31  1  6  0  0  0
 17 18  1  0  0  0  0
 17 30  1  6  0  0  0
 18 19  1  0  0  0  0
 18 20  1  6  0  0  0
 20 28  1  0  0  0  0
 20 21  1  0  0  0  0
 21 22  2  0  0  0  0
 22 23  1  0  0  0  0
 23 28  1  0  0  0  0
 23 24  2  0  0  0  0
 24 25  1  0  0  0  0
 24 29  1  0  0  0  0
 25 26  2  0  0  0  0
 26 27  1  0  0  0  0
 27 28  2  0  0  0  0
 29 51  1  0  0  0  0
 29 52  1  0  0  0  0
 30 53  1  0  0  0  0
 31 32  1  0  0  0  0
 32 33  2  0  0  0  0
 32 34  1  0  0  0  0
 32 35  1  0  0  0  0
 34 54  1  0  0  0  0
 35 55  1  0  0  0  0
 36 37  1  1  0  0  0
 36 48  1  0  0  0  0
 37 38  2  0  0  0  0
 37 39  1  0  0  0  0
 39 40  1  0  0  0  0
 39 56  1  0  0  0  0
 40 41  1  0  0  0  0
 41 42  1  0  0  0  0
 42 43  2  0  0  0  0
 42 44  1  0  0  0  0
 44 45  1  0  0  0  0
 44 57  1  0  0  0  0
 45 46  1  0  0  0  0
 46 47  1  0  0  0  0
 47 58  1  0  0  0  0
 48 59  1  0  0  0  0
M  END
>  <CHROM.1>
77.61806725,179.96623042,-174.59025085,-175.62992040,175.84971150,60.06169504
91.01516447,86.60902130,17.80931268,48.00419686,72.70849089,-175.61461073
-58.74628153,114.15837193,175.51388235,152.57524255,-32.39560795,87.47409336
-5.17661256,-53.89616287,-107.66350292,-67.73616504,108.13655242,-114.29704085
53.10967387,-74.22487584,221.99746391,186.71537529,247.41029125,1.62821053
1.44620942,-1.16372066

>  <Name>


>  <RI>
0

>  <Rbt.Current_Directory>
/data/dnb03/galaxy_db/job_working_directory/014/442/14442272/working

>  <Rbt.Executable>
rbdock ($Id: //depot/dev/client3/rdock/2013.1/src/exe/rbdock.cxx#4 $)

>  <Rbt.Library>
libRbt.so (2013.1, Build901 2013/11/27)

>  <Rbt.Parameter_File>
/usr/local/tools/_conda/envs/__rdock@2013.1-0/share/rdock-2013.1-1/data/scripts/dock.prm

>  <Rbt.Receptor>
receptor.prm

>  <SCORE>
-0.0272476

>  <SCORE.INTER>
25.4

>  <SCORE.INTER.CONST>
1

>  <SCORE.INTER.POLAR>
0

>  <SCORE.INTER.REPUL>
0

>  <SCORE.INTER.ROT>
20

>  <SCORE.INTER.VDW>
0

>  <SCORE.INTER.norm>
0.529167

>  <SCORE.INTRA>
-25.4272

>  <SCORE.INTRA.DIHEDRAL>
-1.75045

>  <SCORE.INTRA.DIHEDRAL.0>
19.5765

>  <SCORE.INTRA.POLAR>
-3.68519

>  <SCORE.INTRA.POLAR.0>
0

>  <SCORE.INTRA.REPUL>
-0.412779

>  <SCORE.INTRA.REPUL.0>
0.564511

>  <SCORE.INTRA.VDW>
-9.95847

>  <SCORE.INTRA.VDW.0>
-6.59836

>  <SCORE.INTRA.norm>
-0.529734

>  <SCORE.RESTR>


>  <SCORE.RESTR.norm>
0

>  <SCORE.SYSTEM>
0

>  <SCORE.SYSTEM.CONST>
0

>  <SCORE.SYSTEM.DIHEDRAL>
0

>  <SCORE.SYSTEM.norm>
0

>  <SCORE.heavy>
48

>  <SCORE.norm>
-0.000567659

>  <TransFSReceptor>
receptor

>  <TransFSScore>
0.002160

$$$$

 OpenBabel01192115203D
libRbt.so/2013.1/901 2013/11/27
 66 68  0  0  0  0  0  0  0  0999 V2000
  214.7574  184.6500  251.2343 C   0  0  0  0  0  0  0  0  0  0  0  0
  216.2512  184.9350  250.9993 C   0  0  1  0  0  0  0  0  0  0  0  0
  216.4374  185.6117  249.6277 C   0  0  1  0  0  0  0  0  0  0  0  0
  217.8805  185.8723  249.2133 C   0  0  0  0  0  0  0  0  0  0  0  0
  215.8587  184.7774  248.6116 O   0  0  0  0  0  0  0  0  0  0  0  0
  216.7887  185.7738  252.1595 C   0  0  0  0  0  0  0  0  0  0  0  0
  216.8066  186.9973  252.1707 O   0  0  0  0  0  0  0  0  0  0  0  0
  217.3419  184.8337  253.5544 S   0  0  0  0  0  0  0  0  0  0  0  0
  218.4098  186.0605  254.3909 C   0  0  0  0  0  0  0  0  0  0  0  0
  219.8583  185.9662  253.8766 C   0  0  0  0  0  0  0  0  0  0  0  0
  220.0172  186.2392  252.4571 N   0  0  0  0  0  0  0  0  0  0  0  0
  221.2515  186.4940  251.9089 C   0  0  0  0  0  0  0  0  0  0  0  0
  222.3002  186.4404  252.5599 O   0  0  0  0  0  0  0  0  0  0  0  0
  221.2511  186.7928  250.4381 C   0  0  0  0  0  0  0  0  0  0  0  0
  221.0944  188.2940  250.1961 C   0  0  0  0  0  0  0  0  0  0  0  0
  219.9008  188.8386  250.8367 N   0  0  0  0  0  0  0  0  0  0  0  0
  219.9304  189.2853  252.1545 C   0  0  0  0  0  0  0  0  0  0  0  0
  219.0920  188.9702  252.9801 O   0  0  0  0  0  0  0  0  0  0  0  0
  221.1378  190.1981  252.5136 C   0  0  1  0  0  0  0  0  0  0  0  0
  220.7729  191.7137  252.5687 C   0  0  0  0  0  0  0  0  0  0  0  0
  219.9099  191.9943  253.8237 C   0  0  0  0  0  0  0  0  0  0  0  0
  222.0560  192.5524  252.7202 C   0  0  0  0  0  0  0  0  0  0  0  0
  219.9919  192.0915  251.2799 C   0  0  0  0  0  0  0  0  0  0  0  0
  218.6333  191.6711  251.2419 O   0  0  0  0  0  0  0  0  0  0  0  0
  217.8418  191.9138  249.8458 P   0  0  1  0  0  0  0  0  0  0  0  0
  217.9361  193.2916  249.2947 O   0  0  0  0  0  0  0  0  0  0  0  0
  218.6223  190.8245  248.9386 O   0  0  0  0  0  0  0  0  0  0  0  0
  216.3951  191.2326  250.0053 O   0  0  0  0  0  0  0  0  0  0  0  0
  216.2976  189.6487  250.2721 P   0  0  1  0  0  0  0  0  0  0  0  0
  217.2879  188.7962  249.5608 O   0  0  0  0  0  0  0  0  0  0  0  0
  216.4527  189.6178  251.8740 O   0  0  0  0  0  0  0  0  0  0  0  0
  214.7347  189.2638  250.1952 O   0  0  0  0  0  0  0  0  0  0  0  0
  213.9563  189.1141  249.0169 C   0  0  0  0  0  0  0  0  0  0  0  0
  213.8403  190.5029  248.3284 C   0  0  1  0  0  0  0  0  0  0  0  0
  215.0848  190.9910  247.5689 C   0  0  2  0  0  0  0  0  0  0  0  0
  214.5181  192.1014  246.6877 C   0  0  1  0  0  0  0  0  0  0  0  0
  213.0787  191.6124  246.4099 C   0  0  1  0  0  0  0  0  0  0  0  0
  212.7468  190.5862  247.3887 O   0  0  0  0  0  0  0  0  0  0  0  0
  212.0413  192.6276  246.3891 N   0  0  0  0  0  0  0  0  0  0  0  0
  211.3438  193.0373  245.2776 C   0  0  0  0  0  0  0  0  0  0  0  0
  210.4841  193.9988  245.5577 N   0  0  0  0  0  0  0  0  0  0  0  0
  210.6598  194.2536  246.9005 C   0  0  0  0  0  0  0  0  0  0  0  0
  210.0817  195.1888  247.7814 C   0  0  0  0  0  0  0  0  0  0  0  0
  210.4651  195.1766  249.0785 N   0  0  0  0  0  0  0  0  0  0  0  0
  211.4162  194.2984  249.4579 C   0  0  0  0  0  0  0  0  0  0  0  0
  212.0601  193.3779  248.7075 N   0  0  0  0  0  0  0  0  0  0  0  0
  211.6122  193.4004  247.4370 C   0  0  0  0  0  0  0  0  0  0  0  0
  209.1354  196.1284  247.3953 N   0  0  0  0  0  0  0  0  0  0  0  0
  214.6543  193.3535  247.3595 O   0  0  0  0  0  0  0  0  0  0  0  0
  215.6486  189.9517  246.7756 O   0  0  0  0  0  0  0  0  0  0  0  0
  217.0334  190.2690  246.0350 P   0  0  0  0  0  0  0  0  0  0  0  0
  217.5171  191.6745  246.0025 O   0  0  0  0  0  0  0  0  0  0  0  0
  218.0469  189.2552  246.7382 O   0  0  0  0  0  0  0  0  0  0  0  0
  216.9114  189.5675  244.6129 O   0  0  0  0  0  0  0  0  0  0  0  0
  221.7605  189.7871  253.7319 O   0  0  0  0  0  0  0  0  0  0  0  0
  215.8731  185.2662  247.7709 H   0  0  0  0  0  0  0  0  0  0  0  0
  219.1971  186.2285  251.8615 H   0  0  0  0  0  0  0  0  0  0  0  0
  219.1978  189.1777  250.1974 H   0  0  0  0  0  0  0  0  0  0  0  0
  219.4548  191.2016  248.5914 H   0  0  0  0  0  0  0  0  0  0  0  0
  216.3646  188.7006  252.2188 H   0  0  0  0  0  0  0  0  0  0  0  0
  208.4828  196.3846  248.1269 H   0  0  0  0  0  0  0  0  0  0  0  0
  209.5288  196.8663  246.8258 H   0  0  0  0  0  0  0  0  0  0  0  0
  214.0303  193.3889  248.1137 H   0  0  0  0  0  0  0  0  0  0  0  0
  218.1252  189.4238  247.6909 H   0  0  0  0  0  0  0  0  0  0  0  0
  216.6030  188.6511  244.7413 H   0  0  0  0  0  0  0  0  0  0  0  0
  222.5770  190.2958  253.8554 H   0  0  0  0  0  0  0  0  0  0  0  0
  2  1  1  1  0  0  0
  2  3  1  0  0  0  0
  2  6  1  0  0  0  0
  3  4  1  6  0  0  0
  3  5  1  0  0  0  0
  5 56  1  0  0  0  0
  6  7  2  0  0  0  0
  6  8  1  0  0  0  0
  8  9  1  0  0  0  0
  9 10  1  0  0  0  0
 10 11  1  0  0  0  0
 11 12  1  0  0  0  0
 11 57  1  0  0  0  0
 12 13  2  0  0  0  0
 12 14  1  0  0  0  0
 14 15  1  0  0  0  0
 15 16  1  0  0  0  0
 16 17  1  0  0  0  0
 16 58  1  0  0  0  0
 17 18  2  0  0  0  0
 19 17  1  1  0  0  0
 19 20  1  0  0  0  0
 19 55  1  0  0  0  0
 20 21  1  0  0  0  0
 20 22  1  0  0  0  0
 20 23  1  0  0  0  0
 23 24  1  0  0  0  0
 24 25  1  0  0  0  0
 25 26  2  6  0  0  0
 25 27  1  0  0  0  0
 25 28  1  0  0  0  0
 27 59  1  0  0  0  0
 28 29  1  0  0  0  0
 29 30  2  6  0  0  0
 29 31  1  0  0  0  0
 29 32  1  0  0  0  0
 31 60  1  0  0  0  0
 32 33  1  0  0  0  0
 34 33  1  6  0  0  0
 34 38  1  0  0  0  0
 34 35  1  0  0  0  0
 35 36  1  0  0  0  0
 35 50  1  6  0  0  0
 36 37  1  0  0  0  0
 36 49  1  1  0  0  0
 37 38  1  0  0  0  0
 37 39  1  1  0  0  0
 39 47  1  0  0  0  0
 39 40  1  0  0  0  0
 40 41  2  0  0  0  0
 41 42  1  0  0  0  0
 42 47  1  0  0  0  0
 42 43  2  0  0  0  0
 43 44  1  0  0  0  0
 43 48  1  0  0  0  0
 44 45  2  0  0  0  0
 45 46  1  0  0  0  0
 46 47  2  0  0  0  0
 48 61  1  0  0  0  0
 48 62  1  0  0  0  0
 49 63  1  0  0  0  0
 50 51  1  0  0  0  0
 51 52  2  0  0  0  0
 51 53  1  0  0  0  0
 51 54  1  0  0  0  0
 53 64  1  0  0  0  0
 54 65  1  0  0  0  0
 55 66  1  0  0  0  0
M  END
>  <CHROM.1>
-176.09571087,-91.08357700,172.40547391,160.58171529,-89.81257683,61.52842477
165.01264953,90.21726672,-55.61648215,87.53469287,-132.16785535,101.96002109
71.66849480,172.05058273,76.15012270,-173.72784488,-50.62036738,-83.59429620
-61.22310598,-37.44115449,176.88308749,77.13810427,-66.21458373,75.98300894
-174.28070817,-70.84026400,111.22530737,149.86237466,-11.21169272,-61.53712376
-48.70808333,216.61742606,189.93246884,249.72959372,0.65738313,0.51051650
2.98115230

>  <Name>


>  <RI>
0

>  <Rbt.Current_Directory>
/data/dnb03/galaxy_db/job_working_directory/014/442/14442273/working

>  <Rbt.Executable>
rbdock ($Id: //depot/dev/client3/rdock/2013.1/src/exe/rbdock.cxx#4 $)

>  <Rbt.Library>
libRbt.so (2013.1, Build901 2013/11/27)

>  <Rbt.Parameter_File>
/usr/local/tools/_conda/envs/__rdock@2013.1-0/share/rdock-2013.1-1/data/scripts/dock.prm

>  <Rbt.Receptor>
receptor.prm

>  <SCORE>
5.0003

>  <SCORE.INTER>
29.4

>  <SCORE.INTER.CONST>
1

>  <SCORE.INTER.POLAR>
0

>  <SCORE.INTER.REPUL>
0

>  <SCORE.INTER.ROT>
24

>  <SCORE.INTER.VDW>
0

>  <SCORE.INTER.norm>
0.534545

>  <SCORE.INTRA>
-24.3997

>  <SCORE.INTRA.DIHEDRAL>
-1.92188

>  <SCORE.INTRA.DIHEDRAL.0>
24.4724

>  <SCORE.INTRA.POLAR>
-3.16703

>  <SCORE.INTRA.POLAR.0>
-1.93063

>  <SCORE.INTRA.REPUL>
0

>  <SCORE.INTRA.REPUL.0>
0

>  <SCORE.INTRA.VDW>
-12.6709

>  <SCORE.INTRA.VDW.0>
-3.76525

>  <SCORE.INTRA.norm>
-0.443631

>  <SCORE.RESTR>


>  <SCORE.RESTR.norm>
0

>  <SCORE.SYSTEM>
0

>  <SCORE.SYSTEM.CONST>
0

>  <SCORE.SYSTEM.DIHEDRAL>
0

>  <SCORE.SYSTEM.norm>
0

>  <SCORE.heavy>
55

>  <SCORE.norm>
0.0909146

>  <TransFSReceptor>
receptor

>  <TransFSScore>
0.254093

$$$$

 OpenBabel01192115203D
libRbt.so/2013.1/901 2013/11/27
 11 11  0  0  0  0  0  0  0  0999 V2000
  201.3545  203.6858  252.5840 C   0  0  0  0  0  0  0  0  0  0  0  0
  200.4146  204.8546  252.7234 C   0  0  0  0  0  0  0  0  0  0  0  0
  199.9523  205.3643  253.8246 N   0  0  0  0  0  0  0  0  0  0  0  0
  200.3156  204.8570  255.0293 N   0  0  0  0  0  0  0  0  0  0  0  0
  199.8914  205.3664  256.2175 C   0  0  0  0  0  0  0  0  0  0  0  0
  200.3287  204.9242  257.3789 N   0  0  0  0  0  0  0  0  0  0  0  0
  199.7304  205.6201  258.4127 C   0  0  0  0  0  0  0  0  0  0  0  0
  198.8468  206.6030  258.0353 C   0  0  0  0  0  0  0  0  0  0  0  0
  198.7357  206.6510  256.3315 S   0  0  0  0  0  0  0  0  0  0  0  0
  199.9452  205.5082  251.4444 C   0  0  0  0  0  0  0  0  0  0  0  0
  201.0516  204.1650  255.1165 H   0  0  0  0  0  0  0  0  0  0  0  0
  1  2  1  0  0  0  0
  2  3  2  0  0  0  0
  2 10  1  0  0  0  0
  3  4  1  0  0  0  0
  4  5  1  0  0  0  0
  4 11  1  0  0  0  0
  5  9  1  0  0  0  0
  5  6  2  0  0  0  0
  6  7  1  0  0  0  0
  7  8  2  0  0  0  0
  8  9  1  0  0  0  0
M  END
>  <CHROM.1>
178.38065325,-174.95079871,199.82975351,205.47419232,255.26747538,-1.21949119
-0.85472306,1.58552998

>  <Name>


>  <RI>
0

>  <Rbt.Current_Directory>
/data/dnb03/galaxy_db/job_working_directory/014/442/14442274/working

>  <Rbt.Executable>
rbdock ($Id: //depot/dev/client3/rdock/2013.1/src/exe/rbdock.cxx#4 $)

>  <Rbt.Library>
libRbt.so (2013.1, Build901 2013/11/27)

>  <Rbt.Parameter_File>
/usr/local/tools/_conda/envs/__rdock@2013.1-0/share/rdock-2013.1-1/data/scripts/dock.prm

>  <Rbt.Receptor>
receptor.prm

>  <SCORE>
7.30063

>  <SCORE.INTER>
7.4

>  <SCORE.INTER.CONST>
1

>  <SCORE.INTER.POLAR>
0

>  <SCORE.INTER.REPUL>
0

>  <SCORE.INTER.ROT>
2

>  <SCORE.INTER.VDW>
0

>  <SCORE.INTER.norm>
0.74

>  <SCORE.INTRA>
-0.0993658

>  <SCORE.INTRA.DIHEDRAL>
-0.301561

>  <SCORE.INTRA.DIHEDRAL.0>
1.10046

>  <SCORE.INTRA.POLAR>
0

>  <SCORE.INTRA.POLAR.0>
0

>  <SCORE.INTRA.REPUL>
0

>  <SCORE.INTRA.REPUL.0>
0

>  <SCORE.INTRA.VDW>
0.0514148

>  <SCORE.INTRA.VDW.0>
-0.463319

>  <SCORE.INTRA.norm>
-0.00993658

>  <SCORE.RESTR>


>  <SCORE.RESTR.norm>
0

>  <SCORE.SYSTEM>
0

>  <SCORE.SYSTEM.CONST>
0

>  <SCORE.SYSTEM.DIHEDRAL>
0

>  <SCORE.SYSTEM.norm>
0

>  <SCORE.heavy>
10

>  <SCORE.norm>
0.730063

>  <TransFSReceptor>
receptor

>  <TransFSScore>
0.000407

$$$$

 OpenBabel01192115203D
libRbt.so/2013.1/901 2013/11/27
 30 32  0  0  0  0  0  0  0  0999 V2000
  209.1404  195.8448  244.3506 C   0  0  0  0  0  0  0  0  0  0  0  0
  208.8824  196.2006  246.1082 S   0  3  1  0  0  0  0  0  0  0  0  0
  208.0749  194.6093  246.4843 C   0  0  0  0  0  0  0  0  0  0  0  0
  207.7953  194.4496  247.9747 C   0  0  0  0  0  0  0  0  0  0  0  0
  206.7475  195.4680  248.4265 C   0  0  0  0  0  0  0  0  0  0  0  0
  207.2866  196.8219  248.3871 N   0  0  0  0  0  0  0  0  0  0  0  0
  210.5639  195.7814  246.6871 C   0  0  0  0  0  0  0  0  0  0  0  0
  210.7215  195.9477  248.2017 C   0  0  1  0  0  0  0  0  0  0  0  0
  212.1416  195.8152  248.7653 C   0  0  2  0  0  0  0  0  0  0  0  0
  211.9618  196.4098  250.1543 C   0  0  1  0  0  0  0  0  0  0  0  0
  210.9916  197.5736  249.8499 C   0  0  1  0  0  0  0  0  0  0  0  0
  210.2703  197.2550  248.6293 O   0  0  0  0  0  0  0  0  0  0  0  0
  210.0662  197.9321  250.9024 N   0  0  0  0  0  0  0  0  0  0  0  0
  210.1753  199.0390  251.7044 C   0  0  0  0  0  0  0  0  0  0  0  0
  209.2887  199.0367  252.6772 N   0  0  0  0  0  0  0  0  0  0  0  0
  208.5712  197.8718  252.4946 C   0  0  0  0  0  0  0  0  0  0  0  0
  207.5399  197.2657  253.2326 C   0  0  0  0  0  0  0  0  0  0  0  0
  207.0094  196.1097  252.7726 N   0  0  0  0  0  0  0  0  0  0  0  0
  207.5291  195.5676  251.6515 C   0  0  0  0  0  0  0  0  0  0  0  0
  208.5451  196.0257  250.8877 N   0  0  0  0  0  0  0  0  0  0  0  0
  209.0083  197.1968  251.3664 C   0  0  0  0  0  0  0  0  0  0  0  0
  207.0457  197.7860  254.4198 N   0  0  0  0  0  0  0  0  0  0  0  0
  211.4841  195.3988  251.0445 O   0  0  0  0  0  0  0  0  0  0  0  0
  213.1120  196.5884  248.0558 O   0  0  0  0  0  0  0  0  0  0  0  0
  208.1736  196.8581  248.8868 H   0  0  0  0  0  0  0  0  0  0  0  0
  206.6543  197.4548  248.8762 H   0  0  0  0  0  0  0  0  0  0  0  0
  207.6939  197.7329  255.1966 H   0  0  0  0  0  0  0  0  0  0  0  0
  206.5190  198.6381  254.2879 H   0  0  0  0  0  0  0  0  0  0  0  0
  210.5347  195.2298  250.8714 H   0  0  0  0  0  0  0  0  0  0  0  0
  213.9899  196.4482  248.4506 H   0  0  0  0  0  0  0  0  0  0  0  0
  2  1  1  6  0  0  0
  2  3  1  0  0  0  0
  2  7  1  0  0  0  0
  3  4  1  0  0  0  0
  4  5  1  0  0  0  0
  5  6  1  0  0  0  0
  6 25  1  0  0  0  0
  6 26  1  0  0  0  0
  8  7  1  6  0  0  0
  8 12  1  0  0  0  0
  8  9  1  0  0  0  0
  9 10  1  0  0  0  0
  9 24  1  6  0  0  0
 10 11  1  0  0  0  0
 10 23  1  1  0  0  0
 11 12  1  0  0  0  0
 11 13  1  1  0  0  0
 13 21  1  0  0  0  0
 13 14  1  0  0  0  0
 14 15  2  0  0  0  0
 15 16  1  0  0  0  0
 16 21  1  0  0  0  0
 16 17  2  0  0  0  0
 17 18  1  0  0  0  0
 17 22  1  0  0  0  0
 18 19  2  0  0  0  0
 19 20  1  0  0  0  0
 20 21  2  0  0  0  0
 22 27  1  0  0  0  0
 22 28  1  0  0  0  0
 23 29  1  0  0  0  0
 24 30  1  0  0  0  0
M  CHG  1   2   1
M  END
>  <CHROM.1>
174.67195063,-179.04260357,66.60149712,-68.97993846,-51.20456827,-171.58761165
-178.94840177,-75.29087142,104.78624239,-69.37891953,209.33464259,196.54961875
249.56252876,1.36826877,-0.18367708,-1.87349187

>  <Name>


>  <RI>
0

>  <Rbt.Current_Directory>
/data/dnb03/galaxy_db/job_working_directory/014/442/14442275/working

>  <Rbt.Executable>
rbdock ($Id: //depot/dev/client3/rdock/2013.1/src/exe/rbdock.cxx#4 $)

>  <Rbt.Library>
libRbt.so (2013.1, Build901 2013/11/27)

>  <Rbt.Parameter_File>
/usr/local/tools/_conda/envs/__rdock@2013.1-0/share/rdock-2013.1-1/data/scripts/dock.prm

>  <Rbt.Receptor>
receptor.prm

>  <SCORE>
3.9469

>  <SCORE.INTER>
13.4

>  <SCORE.INTER.CONST>
1

>  <SCORE.INTER.POLAR>
0

>  <SCORE.INTER.REPUL>
0

>  <SCORE.INTER.ROT>
8

>  <SCORE.INTER.VDW>
0

>  <SCORE.INTER.norm>
0.558333

>  <SCORE.INTRA>
-9.4531

>  <SCORE.INTRA.DIHEDRAL>
-4.92154

>  <SCORE.INTRA.DIHEDRAL.0>
11.548

>  <SCORE.INTRA.POLAR>
-1.29677

>  <SCORE.INTRA.POLAR.0>
-1

>  <SCORE.INTRA.REPUL>
0

>  <SCORE.INTRA.REPUL.0>
0

>  <SCORE.INTRA.VDW>
-2.58332

>  <SCORE.INTRA.VDW.0>
-2.67887

>  <SCORE.INTRA.norm>
-0.393879

>  <SCORE.RESTR>


>  <SCORE.RESTR.norm>
0

>  <SCORE.SYSTEM>
0

>  <SCORE.SYSTEM.CONST>
0

>  <SCORE.SYSTEM.DIHEDRAL>
0

>  <SCORE.SYSTEM.norm>
0

>  <SCORE.heavy>
24

>  <SCORE.norm>
0.164454

>  <TransFSReceptor>
receptor

>  <TransFSScore>
0.013572

$$$$

 OpenBabel01192115203D
libRbt.so/2013.1/901 2013/11/27
 21 23  0  0  0  0  0  0  0  0999 V2000
  193.4627  216.0186  253.9486 C   0  0  0  0  0  0  0  0  0  0  0  0
  193.5246  215.6684  252.4646 C   0  0  1  0  0  0  0  0  0  0  0  0
  194.9975  215.8058  252.0990 C   0  0  0  0  0  0  0  0  0  0  0  0
  195.5166  216.8895  252.9553 N   0  0  0  0  0  0  0  0  0  0  0  0
  194.7359  216.8089  254.2341 C   0  0  2  0  0  0  0  0  0  0  0  0
  195.5847  216.1090  255.3054 C   0  0  0  0  0  0  0  0  0  0  0  0
  195.8273  216.5617  256.4100 O   0  0  0  0  0  0  0  0  0  0  0  0
  195.9988  214.8830  254.8985 O   0  0  0  0  0  0  0  0  0  0  0  0
  192.9424  214.3898  252.1351 N   0  0  0  0  0  0  0  0  0  0  0  0
  191.9079  214.2049  251.2456 C   0  0  0  0  0  0  0  0  0  0  0  0
  191.5407  212.9423  251.1644 N   0  0  0  0  0  0  0  0  0  0  0  0
  192.3669  212.2727  252.0389 C   0  0  0  0  0  0  0  0  0  0  0  0
  193.2370  213.1570  252.6291 C   0  0  0  0  0  0  0  0  0  0  0  0
  194.1527  212.7641  253.5294 N   0  0  0  0  0  0  0  0  0  0  0  0
  194.1620  211.4190  253.8275 C   0  0  0  0  0  0  0  0  0  0  0  0
  193.3927  210.4999  253.3355 N   0  0  0  0  0  0  0  0  0  0  0  0
  192.4169  210.8467  252.3950 C   0  0  0  0  0  0  0  0  0  0  0  0
  191.6581  210.0209  251.9038 O   0  0  0  0  0  0  0  0  0  0  0  0
  195.2784  217.7841  252.5106 H   0  0  0  0  0  0  0  0  0  0  0  0
  196.5187  214.4961  255.6486 H   0  0  0  0  0  0  0  0  0  0  0  0
  194.7968  213.3696  254.0281 H   0  0  0  0  0  0  0  0  0  0  0  0
  1  5  1  0  0  0  0
  2  1  1  1  0  0  0
  2  3  1  0  0  0  0
  2  9  1  0  0  0  0
  3  4  1  0  0  0  0
  4  5  1  0  0  0  0
  4 19  1  0  0  0  0
  5  6  1  1  0  0  0
  6  7  2  0  0  0  0
  6  8  1  0  0  0  0
  8 20  1  0  0  0  0
  9 13  1  0  0  0  0
  9 10  1  0  0  0  0
 10 11  2  0  0  0  0
 11 12  1  0  0  0  0
 12 17  1  0  0  0  0
 12 13  2  0  0  0  0
 13 14  1  0  0  0  0
 14 15  1  0  0  0  0
 14 21  1  0  0  0  0
 15 16  2  0  0  0  0
 16 17  1  0  0  0  0
 17 18  2  0  0  0  0
M  END
>  <CHROM.1>
121.83245982,-115.06816376,-178.82763576,193.79918530,213.98992838,253.18615468
0.72454281,-0.88048181,-0.27278054

>  <Name>


>  <RI>
0

>  <Rbt.Current_Directory>
/data/dnb03/galaxy_db/job_working_directory/014/442/14442276/working

>  <Rbt.Executable>
rbdock ($Id: //depot/dev/client3/rdock/2013.1/src/exe/rbdock.cxx#4 $)

>  <Rbt.Library>
libRbt.so (2013.1, Build901 2013/11/27)

>  <Rbt.Parameter_File>
/usr/local/tools/_conda/envs/__rdock@2013.1-0/share/rdock-2013.1-1/data/scripts/dock.prm

>  <Rbt.Receptor>
receptor.prm

>  <SCORE>
3.06563

>  <SCORE.INTER>
7.4

>  <SCORE.INTER.CONST>
1

>  <SCORE.INTER.POLAR>
0

>  <SCORE.INTER.REPUL>
0

>  <SCORE.INTER.ROT>
2

>  <SCORE.INTER.VDW>
0

>  <SCORE.INTER.norm>
0.411111

>  <SCORE.INTRA>
-4.33437

>  <SCORE.INTRA.DIHEDRAL>
-1.69738

>  <SCORE.INTRA.DIHEDRAL.0>
4.89976

>  <SCORE.INTRA.POLAR>
-0.478661

>  <SCORE.INTRA.POLAR.0>
-0.521339

>  <SCORE.INTRA.REPUL>
0

>  <SCORE.INTRA.REPUL.0>
0

>  <SCORE.INTRA.VDW>
-1.85824

>  <SCORE.INTRA.VDW.0>
-0.0836874

>  <SCORE.INTRA.norm>
-0.240798

>  <SCORE.RESTR>


>  <SCORE.RESTR.norm>
0

>  <SCORE.SYSTEM>
0

>  <SCORE.SYSTEM.CONST>
0

>  <SCORE.SYSTEM.DIHEDRAL>
0

>  <SCORE.SYSTEM.norm>
0

>  <SCORE.heavy>
18

>  <SCORE.norm>
0.170313

>  <TransFSReceptor>
receptor

>  <TransFSScore>
0.006309

$$$$

 OpenBabel01192115203D
libRbt.so/2013.1/901 2013/11/27
 20 21  0  0  0  0  0  0  0  0999 V2000
  206.0590  197.8253  238.9002 C   0  0  0  0  0  0  0  0  0  0  0  0
  205.5534  199.2642  238.7607 C   0  0  1  0  0  0  0  0  0  0  0  0
  205.1668  199.8580  240.1023 C   0  0  0  0  0  0  0  0  0  0  0  0
  203.8188  199.8781  240.4931 C   0  0  0  0  0  0  0  0  0  0  0  0
  203.4425  200.4246  241.7211 C   0  0  0  0  0  0  0  0  0  0  0  0
  204.4057  200.9656  242.5690 C   0  0  0  0  0  0  0  0  0  0  0  0
  205.7446  200.9608  242.1917 C   0  0  0  0  0  0  0  0  0  0  0  0
  206.1255  200.4133  240.9677 C   0  0  0  0  0  0  0  0  0  0  0  0
  206.5411  200.1138  238.1194 N   0  0  0  0  0  0  0  0  0  0  0  0
  206.4725  200.4339  236.7818 C   0  0  0  0  0  0  0  0  0  0  0  0
  205.4853  200.1797  236.0921 O   0  0  0  0  0  0  0  0  0  0  0  0
  207.6457  201.2431  236.2274 C   0  0  1  0  0  0  0  0  0  0  0  0
  207.4894  201.3881  234.7167 C   0  0  0  0  0  0  0  0  0  0  0  0
  207.7525  202.9138  236.9742 S   0  0  0  0  0  0  0  0  0  0  0  0
  208.2896  202.5462  238.5975 C   0  0  0  0  0  0  0  0  0  0  0  0
  208.7847  201.3815  238.9508 N   0  0  0  0  0  0  0  0  0  0  0  0
  209.1348  201.3454  240.2876 N   0  0  0  0  0  0  0  0  0  0  0  0
  208.8936  202.4918  240.8848 C   0  0  0  0  0  0  0  0  0  0  0  0
  208.2002  203.6902  239.8750 S   0  0  0  0  0  0  0  0  0  0  0  0
  207.4022  200.3050  238.6141 H   0  0  0  0  0  0  0  0  0  0  0  0
  2  1  1  1  0  0  0
  2  3  1  0  0  0  0
  2  9  1  0  0  0  0
  3  8  1  0  0  0  0
  3  4  2  0  0  0  0
  4  5  1  0  0  0  0
  5  6  2  0  0  0  0
  6  7  1  0  0  0  0
  7  8  2  0  0  0  0
  9 10  1  0  0  0  0
  9 20  1  0  0  0  0
 10 11  2  0  0  0  0
 10 12  1  0  0  0  0
 12 13  1  6  0  0  0
 12 14  1  0  0  0  0
 14 15  1  0  0  0  0
 15 19  1  0  0  0  0
 15 16  2  0  0  0  0
 16 17  1  0  0  0  0
 17 18  2  0  0  0  0
 18 19  1  0  0  0  0
M  END
>  <CHROM.1>
-98.62172202,99.43177533,174.17925662,71.35047616,14.86901424,206.77021430
201.19428179,238.96895797,2.37270856,0.75763379,1.34194035

>  <Name>


>  <RI>
0

>  <Rbt.Current_Directory>
/data/dnb03/galaxy_db/job_working_directory/014/442/14442277/working

>  <Rbt.Executable>
rbdock ($Id: //depot/dev/client3/rdock/2013.1/src/exe/rbdock.cxx#4 $)

>  <Rbt.Library>
libRbt.so (2013.1, Build901 2013/11/27)

>  <Rbt.Parameter_File>
/usr/local/tools/_conda/envs/__rdock@2013.1-0/share/rdock-2013.1-1/data/scripts/dock.prm

>  <Rbt.Receptor>
receptor.prm

>  <SCORE>
6.86268

>  <SCORE.INTER>
10.4

>  <SCORE.INTER.CONST>
1

>  <SCORE.INTER.POLAR>
0

>  <SCORE.INTER.REPUL>
0

>  <SCORE.INTER.ROT>
5

>  <SCORE.INTER.VDW>
0

>  <SCORE.INTER.norm>
0.547368

>  <SCORE.INTRA>
-3.53732

>  <SCORE.INTRA.DIHEDRAL>
-0.0372878

>  <SCORE.INTRA.DIHEDRAL.0>
3.03495

>  <SCORE.INTRA.POLAR>
-1

>  <SCORE.INTRA.POLAR.0>
0

>  <SCORE.INTRA.REPUL>
0

>  <SCORE.INTRA.REPUL.0>
0

>  <SCORE.INTRA.VDW>
-0.118681

>  <SCORE.INTRA.VDW.0>
-2.20214

>  <SCORE.INTRA.norm>
-0.186175

>  <SCORE.RESTR>


>  <SCORE.RESTR.norm>
0

>  <SCORE.SYSTEM>
0

>  <SCORE.SYSTEM.CONST>
0

>  <SCORE.SYSTEM.DIHEDRAL>
0

>  <SCORE.SYSTEM.norm>
0

>  <SCORE.heavy>
19

>  <SCORE.norm>
0.361193

>  <TransFSReceptor>
receptor

>  <TransFSScore>
0.000754

$$$$

 OpenBabel01192115203D
libRbt.so/2013.1/901 2013/11/27
 22 22  0  0  0  0  0  0  0  0999 V2000
  187.9511  215.4296  253.8961 C   0  0  0  0  0  0  0  0  0  0  0  0
  189.4427  215.6666  254.0651 C   0  0  0  0  0  0  0  0  0  0  0  0
  189.9031  216.7736  253.2145 C   0  0  0  0  0  0  0  0  0  0  0  0
  190.2517  217.6729  252.5004 C   0  0  0  0  0  0  0  0  0  0  0  0
  190.6480  218.7881  251.6105 C   0  0  1  0  0  0  0  0  0  0  0  0
  192.0304  218.4712  251.0182 C   0  0  0  0  0  0  0  0  0  0  0  0
  192.6168  219.5168  250.0515 C   0  0  0  0  0  0  0  0  0  0  0  0
  192.8942  220.8632  250.7232 C   0  0  0  0  0  0  0  0  0  0  0  0
  193.9301  218.9735  249.4714 C   0  0  0  0  0  0  0  0  0  0  0  0
  189.6499  218.8754  250.5829 O   0  0  0  0  0  0  0  0  0  0  0  0
  188.4242  219.2726  250.9917 C   0  0  0  0  0  0  0  0  0  0  0  0
  188.0952  219.5431  252.1353 O   0  0  0  0  0  0  0  0  0  0  0  0
  187.4435  219.2191  249.8745 C   0  0  0  0  0  0  0  0  0  0  0  0
  186.0972  219.4840  250.1733 C   0  0  0  0  0  0  0  0  0  0  0  0
  185.0968  219.3061  249.2050 C   0  0  0  0  0  0  0  0  0  0  0  0
  185.4690  218.8832  247.9195 C   0  0  0  0  0  0  0  0  0  0  0  0
  186.8088  218.6425  247.6089 C   0  0  0  0  0  0  0  0  0  0  0  0
  187.7952  218.8071  248.5834 C   0  0  0  0  0  0  0  0  0  0  0  0
  183.6411  219.5211  249.5399 C   0  0  0  0  0  0  0  0  0  0  0  0
  183.4191  219.8238  250.8489 F   0  0  0  0  0  0  0  0  0  0  0  0
  183.0846  220.5347  248.8218 F   0  0  0  0  0  0  0  0  0  0  0  0
  182.8842  218.4189  249.2795 F   0  0  0  0  0  0  0  0  0  0  0  0
  1  2  1  0  0  0  0
  2  3  1  0  0  0  0
  3  4  3  0  0  0  0
  5  4  1  1  0  0  0
  5  6  1  0  0  0  0
  5 10  1  0  0  0  0
  6  7  1  0  0  0  0
  7  8  1  0  0  0  0
  7  9  1  0  0  0  0
 10 11  1  0  0  0  0
 11 12  2  0  0  0  0
 11 13  1  0  0  0  0
 13 18  1  0  0  0  0
 13 14  2  0  0  0  0
 14 15  1  0  0  0  0
 15 16  2  0  0  0  0
 15 19  1  0  0  0  0
 16 17  1  0  0  0  0
 17 18  2  0  0  0  0
 19 20  1  0  0  0  0
 19 21  1  0  0  0  0
 19 22  1  0  0  0  0
M  END
>  <CHROM.1>
-21.28880088,-147.40363764,179.65360436,67.63502378,64.01255039,-0.86154151
174.21672421,-3.17902397,187.90033421,218.79177740,250.53647334,0.26371344
0.05928838,2.19885783

>  <Name>


>  <RI>
0

>  <Rbt.Current_Directory>
/data/dnb03/galaxy_db/job_working_directory/014/442/14442278/working

>  <Rbt.Executable>
rbdock ($Id: //depot/dev/client3/rdock/2013.1/src/exe/rbdock.cxx#4 $)

>  <Rbt.Library>
libRbt.so (2013.1, Build901 2013/11/27)

>  <Rbt.Parameter_File>
/usr/local/tools/_conda/envs/__rdock@2013.1-0/share/rdock-2013.1-1/data/scripts/dock.prm

>  <Rbt.Receptor>
receptor.prm

>  <SCORE>
8.51126

>  <SCORE.INTER>
13.4

>  <SCORE.INTER.CONST>
1

>  <SCORE.INTER.POLAR>
0

>  <SCORE.INTER.REPUL>
0

>  <SCORE.INTER.ROT>
8

>  <SCORE.INTER.VDW>
0

>  <SCORE.INTER.norm>
0.609091

>  <SCORE.INTRA>
-4.88874

>  <SCORE.INTRA.DIHEDRAL>
-10.6014

>  <SCORE.INTRA.DIHEDRAL.0>
11.8434

>  <SCORE.INTRA.POLAR>
0

>  <SCORE.INTRA.POLAR.0>
0

>  <SCORE.INTRA.REPUL>
0

>  <SCORE.INTRA.REPUL.0>
0

>  <SCORE.INTRA.VDW>
0.411972

>  <SCORE.INTRA.VDW.0>
-1.49812

>  <SCORE.INTRA.norm>
-0.222215

>  <SCORE.RESTR>


>  <SCORE.RESTR.norm>
0

>  <SCORE.SYSTEM>
0

>  <SCORE.SYSTEM.CONST>
0

>  <SCORE.SYSTEM.DIHEDRAL>
0

>  <SCORE.SYSTEM.norm>
0

>  <SCORE.heavy>
22

>  <SCORE.norm>
0.386876

>  <TransFSReceptor>
receptor

>  <TransFSScore>
0.088806

$$$$

 OpenBabel01192115203D
libRbt.so/2013.1/901 2013/11/27
 26 25  0  0  0  0  0  0  0  0999 V2000
  196.0947  223.4048  256.0698 C   0  0  0  0  0  0  0  0  0  0  0  0
  194.9860  222.4084  255.7810 C   0  0  0  0  0  0  0  0  0  0  0  0
  193.8195  223.0362  255.0141 C   0  0  0  0  0  0  0  0  0  0  0  0
  192.7414  221.9812  254.7550 C   0  0  0  0  0  0  0  0  0  0  0  0
  191.5327  222.5345  253.9976 C   0  0  0  0  0  0  0  0  0  0  0  0
  190.4336  221.4808  253.7562 C   0  0  1  0  0  0  0  0  0  0  0  0
  189.8511  220.9706  255.0511 C   0  0  0  0  0  0  0  0  0  0  0  0
  190.0403  219.7201  255.5016 C   0  0  0  0  0  0  0  0  0  0  0  0
  189.5424  219.2538  256.7708 C   0  0  0  0  0  0  0  0  0  0  0  0
  189.8474  218.0464  257.2711 C   0  0  0  0  0  0  0  0  0  0  0  0
  189.3942  217.5629  258.6164 C   0  0  0  0  0  0  0  0  0  0  0  0
  190.4815  217.6834  259.6430 C   0  0  0  0  0  0  0  0  0  0  0  0
  190.4306  218.5192  260.6936 C   0  0  0  0  0  0  0  0  0  0  0  0
  191.5115  218.6347  261.7288 C   0  0  0  0  0  0  0  0  0  0  0  0
  192.1869  219.9738  261.6575 C   0  0  0  0  0  0  0  0  0  0  0  0
  193.4180  220.1637  261.1563 C   0  0  0  0  0  0  0  0  0  0  0  0
  194.0902  221.5038  261.0706 C   0  0  0  0  0  0  0  0  0  0  0  0
  194.4393  221.8822  259.6296 C   0  0  0  0  0  0  0  0  0  0  0  0
  193.2124  222.2818  258.8069 C   0  0  0  0  0  0  0  0  0  0  0  0
  192.3394  221.0947  258.4819 C   0  0  0  0  0  0  0  0  0  0  0  0
  191.1864  220.9362  258.8566 O   0  0  0  0  0  0  0  0  0  0  0  0
  192.9760  220.1922  257.7000 O   0  0  0  0  0  0  0  0  0  0  0  0
  189.4003  222.1213  252.9902 O   0  0  0  0  0  0  0  0  0  0  0  0
  188.4163  221.0924  252.6675 O   0  0  0  0  0  0  0  0  0  0  0  0
  192.4252  219.4232  257.4669 H   0  0  0  0  0  0  0  0  0  0  0  0
  187.8486  221.6631  252.1190 H   0  0  0  0  0  0  0  0  0  0  0  0
  1  2  1  0  0  0  0
  2  3  1  0  0  0  0
  3  4  1  0  0  0  0
  4  5  1  0  0  0  0
  6  5  1  1  0  0  0
  6  7  1  0  0  0  0
  6 23  1  0  0  0  0
  7  8  2  0  0  0  0
  8  9  1  0  0  0  0
  9 10  2  0  0  0  0
 10 11  1  0  0  0  0
 11 12  1  0  0  0  0
 12 13  2  0  0  0  0
 13 14  1  0  0  0  0
 14 15  1  0  0  0  0
 15 16  2  0  0  0  0
 16 17  1  0  0  0  0
 17 18  1  0  0  0  0
 18 19  1  0  0  0  0
 19 20  1  0  0  0  0
 20 21  2  0  0  0  0
 20 22  1  0  0  0  0
 22 25  1  0  0  0  0
 23 24  1  0  0  0  0
 24 26  1  0  0  0  0
M  END
>  <CHROM.1>
179.92376615,179.62654261,-178.99469466,62.91375212,-111.11628065,175.32047026
-173.23992123,-100.62920188,113.42164670,112.76869139,-105.98056903,-120.10223434
73.58677242,-71.66668396,116.77547706,-179.13761179,-176.33765553,191.76440366
220.73187896,257.31873281,-1.83370936,0.57019705,2.00073041

>  <Name>


>  <RI>
0

>  <Rbt.Current_Directory>
/data/dnb03/galaxy_db/job_working_directory/014/442/14442279/working

>  <Rbt.Executable>
rbdock ($Id: //depot/dev/client3/rdock/2013.1/src/exe/rbdock.cxx#4 $)

>  <Rbt.Library>
libRbt.so (2013.1, Build901 2013/11/27)

>  <Rbt.Parameter_File>
/usr/local/tools/_conda/envs/__rdock@2013.1-0/share/rdock-2013.1-1/data/scripts/dock.prm

>  <Rbt.Receptor>
receptor.prm

>  <SCORE>
15.5858

>  <SCORE.INTER>
20.4

>  <SCORE.INTER.CONST>
1

>  <SCORE.INTER.POLAR>
0

>  <SCORE.INTER.REPUL>
0

>  <SCORE.INTER.ROT>
15

>  <SCORE.INTER.VDW>
0

>  <SCORE.INTER.norm>
0.85

>  <SCORE.INTRA>
-4.81424

>  <SCORE.INTRA.DIHEDRAL>
2.2732

>  <SCORE.INTRA.DIHEDRAL.0>
1.71085

>  <SCORE.INTRA.POLAR>
0

>  <SCORE.INTRA.POLAR.0>
0

>  <SCORE.INTRA.REPUL>
0

>  <SCORE.INTRA.REPUL.0>
0

>  <SCORE.INTRA.VDW>
-5.95084

>  <SCORE.INTRA.VDW.0>
-0.455019

>  <SCORE.INTRA.norm>
-0.200593

>  <SCORE.RESTR>


>  <SCORE.RESTR.norm>
0

>  <SCORE.SYSTEM>
0

>  <SCORE.SYSTEM.CONST>
0

>  <SCORE.SYSTEM.DIHEDRAL>
0

>  <SCORE.SYSTEM.norm>
0

>  <SCORE.heavy>
24

>  <SCORE.norm>
0.649407

>  <TransFSReceptor>
receptor

>  <TransFSScore>
0.009169

$$$$

 OpenBabel01192115203D
libRbt.so/2013.1/901 2013/11/27
 27 29  0  0  0  0  0  0  0  0999 V2000
  197.0777  191.7669  251.3387 C   0  0  0  0  0  0  0  0  0  0  0  0
  197.9839  192.5701  252.2527 C   0  0  0  0  0  0  0  0  0  0  0  0
  197.2398  193.7078  252.9345 C   0  0  0  0  0  0  0  0  0  0  0  0
  196.5300  194.5914  251.9160 N   0  3  0  0  0  0  0  0  0  0  0  0
  197.2744  195.0951  251.4142 H   0  0  0  0  0  0  0  0  0  0  0  0
  195.6966  193.8209  250.9251 C   0  0  0  0  0  0  0  0  0  0  0  0
  196.4742  192.6829  250.2869 C   0  0  0  0  0  0  0  0  0  0  0  0
  195.6629  195.6394  252.6124 C   0  0  0  0  0  0  0  0  0  0  0  0
  196.4674  196.7215  253.3356 C   0  0  0  0  0  0  0  0  0  0  0  0
  197.6029  197.0928  252.5286 O   0  0  0  0  0  0  0  0  0  0  0  0
  197.3031  197.6961  251.3362 C   0  0  0  0  0  0  0  0  0  0  0  0
  196.2633  198.3157  251.1202 O   0  0  0  0  0  0  0  0  0  0  0  0
  198.3852  197.4811  250.2381 C   0  0  0  0  0  0  0  0  0  0  0  0
  197.7465  197.6812  248.8525 C   0  0  0  0  0  0  0  0  0  0  0  0
  197.0651  196.6250  248.2181 C   0  0  0  0  0  0  0  0  0  0  0  0
  196.5166  196.7806  246.9436 C   0  0  0  0  0  0  0  0  0  0  0  0
  196.6309  197.9973  246.2795 C   0  0  0  0  0  0  0  0  0  0  0  0
  197.2636  199.0691  246.9018 C   0  0  0  0  0  0  0  0  0  0  0  0
  197.7963  198.9209  248.1852 C   0  0  0  0  0  0  0  0  0  0  0  0
  199.6843  198.2661  250.5021 C   0  0  0  0  0  0  0  0  0  0  0  0
  199.8945  198.9259  251.7291 C   0  0  0  0  0  0  0  0  0  0  0  0
  201.0466  199.6801  251.9649 C   0  0  0  0  0  0  0  0  0  0  0  0
  201.9999  199.8251  250.9651 C   0  0  0  0  0  0  0  0  0  0  0  0
  201.7986  199.2230  249.7255 C   0  0  0  0  0  0  0  0  0  0  0  0
  200.6520  198.4555  249.4930 C   0  0  0  0  0  0  0  0  0  0  0  0
  198.8293  196.1064  250.3275 O   0  0  0  0  0  0  0  0  0  0  0  0
  199.4718  195.9803  249.6032 H   0  0  0  0  0  0  0  0  0  0  0  0
  1  7  1  0  0  0  0
  1  2  1  0  0  0  0
  2  3  1  0  0  0  0
  3  4  1  0  0  0  0
  4  5  1  0  0  0  0
  4  6  1  0  0  0  0
  4  8  1  0  0  0  0
  6  7  1  0  0  0  0
  8  9  1  0  0  0  0
  9 10  1  0  0  0  0
 10 11  1  0  0  0  0
 11 12  2  0  0  0  0
 11 13  1  0  0  0  0
 13 14  1  0  0  0  0
 13 20  1  0  0  0  0
 13 26  1  0  0  0  0
 14 19  1  0  0  0  0
 14 15  2  0  0  0  0
 15 16  1  0  0  0  0
 16 17  2  0  0  0  0
 17 18  1  0  0  0  0
 18 19  2  0  0  0  0
 20 25  1  0  0  0  0
 20 21  2  0  0  0  0
 21 22  1  0  0  0  0
 22 23  2  0  0  0  0
 23 24  1  0  0  0  0
 24 25  2  0  0  0  0
 26 27  1  0  0  0  0
M  CHG  1   4   1
M  END
>  <CHROM.1>
69.86079141,40.30335027,65.22874246,25.09792302,157.67405848,-84.18719034
9.17313496,177.15827878,197.94052224,196.70934175,250.49847723,-2.31390126
-0.80970090,-0.97000961

>  <Name>


>  <RI>
0

>  <Rbt.Current_Directory>
/data/dnb03/galaxy_db/job_working_directory/014/442/14442280/working

>  <Rbt.Executable>
rbdock ($Id: //depot/dev/client3/rdock/2013.1/src/exe/rbdock.cxx#4 $)

>  <Rbt.Library>
libRbt.so (2013.1, Build901 2013/11/27)

>  <Rbt.Parameter_File>
/usr/local/tools/_conda/envs/__rdock@2013.1-0/share/rdock-2013.1-1/data/scripts/dock.prm

>  <Rbt.Receptor>
receptor.prm

>  <SCORE>
2.21047

>  <SCORE.INTER>
12.4

>  <SCORE.INTER.CONST>
1

>  <SCORE.INTER.POLAR>
0

>  <SCORE.INTER.REPUL>
0

>  <SCORE.INTER.ROT>
7

>  <SCORE.INTER.VDW>
0

>  <SCORE.INTER.norm>
0.496

>  <SCORE.INTRA>
-10.1895

>  <SCORE.INTRA.DIHEDRAL>
-7.13211

>  <SCORE.INTRA.DIHEDRAL.0>
15.7022

>  <SCORE.INTRA.POLAR>
-1.50775

>  <SCORE.INTRA.POLAR.0>
0

>  <SCORE.INTRA.REPUL>
0

>  <SCORE.INTRA.REPUL.0>
0

>  <SCORE.INTRA.VDW>
-1.49713

>  <SCORE.INTRA.VDW.0>
-1.3283

>  <SCORE.INTRA.norm>
-0.407581

>  <SCORE.RESTR>


>  <SCORE.RESTR.norm>
0

>  <SCORE.SYSTEM>
0

>  <SCORE.SYSTEM.CONST>
0

>  <SCORE.SYSTEM.DIHEDRAL>
0

>  <SCORE.SYSTEM.norm>
0

>  <SCORE.heavy>
25

>  <SCORE.norm>
0.0884187

>  <TransFSReceptor>
receptor

>  <TransFSScore>
0.009061

$$$$

 OpenBabel01192115203D
libRbt.so/2013.1/901 2013/11/27
 34 37  0  0  0  0  0  0  0  0999 V2000
  200.5964  207.4149  247.8111 C   0  0  0  0  0  0  0  0  0  0  0  0
  199.1161  207.4623  248.2213 C   0  0  0  0  0  0  0  0  0  0  0  0
  198.7629  206.3116  249.0000 O   0  0  0  0  0  0  0  0  0  0  0  0
  199.6031  206.1853  250.1545 C   0  0  0  0  0  0  0  0  0  0  0  0
  201.0989  206.1725  249.7808 C   0  0  0  0  0  0  0  0  0  0  0  0
  201.5247  207.3362  248.9642 N   0  0  0  0  0  0  0  0  0  0  0  0
  201.5593  208.5676  249.7801 C   0  0  0  0  0  0  0  0  0  0  0  0
  202.3451  209.7350  249.1567 C   0  0  0  0  0  0  0  0  0  0  0  0
  201.8105  210.1336  247.8668 N   0  0  0  0  0  0  0  0  0  0  0  0
  200.6634  210.9041  247.7699 C   0  0  0  0  0  0  0  0  0  0  0  0
  200.1063  211.4012  248.7429 O   0  0  0  0  0  0  0  0  0  0  0  0
  200.1762  211.1378  246.3736 C   0  0  0  0  0  0  0  0  0  0  0  0
  199.1523  212.0238  246.2438 N   0  0  0  0  0  0  0  0  0  0  0  0
  198.6696  212.1755  244.9761 C   0  0  0  0  0  0  0  0  0  0  0  0
  197.6354  213.0489  244.6609 C   0  0  0  0  0  0  0  0  0  0  0  0
  197.1279  213.2009  243.4307 N   0  0  0  0  0  0  0  0  0  0  0  0
  197.6655  212.4498  242.4571 C   0  0  0  0  0  0  0  0  0  0  0  0
  198.6616  211.5744  242.6519 N   0  0  0  0  0  0  0  0  0  0  0  0
  199.1544  211.4499  243.8794 C   0  0  0  0  0  0  0  0  0  0  0  0
  200.1613  210.5848  244.0505 N   0  0  0  0  0  0  0  0  0  0  0  0
  200.6903  210.4251  245.2862 C   0  0  0  0  0  0  0  0  0  0  0  0
  201.8112  209.6080  245.3416 N   0  0  0  0  0  0  0  0  0  0  0  0
  197.1387  212.6153  241.0856 C   0  0  0  0  0  0  0  0  0  0  0  0
  197.6555  211.8817  239.9993 C   0  0  0  0  0  0  0  0  0  0  0  0
  197.1667  212.0551  238.6990 C   0  0  0  0  0  0  0  0  0  0  0  0
  196.1455  212.9677  238.4534 C   0  0  0  0  0  0  0  0  0  0  0  0
  195.6102  213.7029  239.5058 C   0  0  0  0  0  0  0  0  0  0  0  0
  196.1008  213.5263  240.8039 C   0  0  0  0  0  0  0  0  0  0  0  0
  197.1101  213.9086  245.6395 N   0  0  0  0  0  0  0  0  0  0  0  0
  202.1333  209.6855  247.0133 H   0  0  0  0  0  0  0  0  0  0  0  0
  201.6105  208.6213  245.1785 H   0  0  0  0  0  0  0  0  0  0  0  0
  202.5767  209.9947  244.8013 H   0  0  0  0  0  0  0  0  0  0  0  0
  197.1212  214.8772  245.3394 H   0  0  0  0  0  0  0  0  0  0  0  0
  197.5754  213.7367  246.5252 H   0  0  0  0  0  0  0  0  0  0  0  0
  1  6  1  0  0  0  0
  1  2  1  0  0  0  0
  2  3  1  0  0  0  0
  3  4  1  0  0  0  0
  4  5  1  0  0  0  0
  5  6  1  0  0  0  0
  6  7  1  0  0  0  0
  7  8  1  0  0  0  0
  8  9  1  0  0  0  0
  9 10  1  0  0  0  0
  9 30  1  0  0  0  0
 10 11  2  0  0  0  0
 10 12  1  0  0  0  0
 12 21  1  0  0  0  0
 12 13  2  0  0  0  0
 13 14  1  0  0  0  0
 14 19  1  0  0  0  0
 14 15  2  0  0  0  0
 15 16  1  0  0  0  0
 15 29  1  0  0  0  0
 16 17  2  0  0  0  0
 17 18  1  0  0  0  0
 17 23  1  0  0  0  0
 18 19  2  0  0  0  0
 19 20  1  0  0  0  0
 20 21  2  0  0  0  0
 21 22  1  0  0  0  0
 22 31  1  0  0  0  0
 22 32  1  0  0  0  0
 23 28  1  0  0  0  0
 23 24  2  0  0  0  0
 24 25  1  0  0  0  0
 25 26  2  0  0  0  0
 26 27  1  0  0  0  0
 27 28  2  0  0  0  0
 29 33  1  0  0  0  0
 29 34  1  0  0  0  0
M  END
>  <CHROM.1>
-75.82052623,59.16534337,77.57480794,-172.19431129,125.97590966,179.13816382
114.81314679,199.19495411,210.60691288,245.34247866,0.29257469,1.17196788
-2.91655558

>  <Name>


>  <RI>
0

>  <Rbt.Current_Directory>
/data/dnb03/galaxy_db/job_working_directory/014/442/14442281/working

>  <Rbt.Executable>
rbdock ($Id: //depot/dev/client3/rdock/2013.1/src/exe/rbdock.cxx#4 $)

>  <Rbt.Library>
libRbt.so (2013.1, Build901 2013/11/27)

>  <Rbt.Parameter_File>
/usr/local/tools/_conda/envs/__rdock@2013.1-0/share/rdock-2013.1-1/data/scripts/dock.prm

>  <Rbt.Receptor>
receptor.prm

>  <SCORE>
8.68367

>  <SCORE.INTER>
12.4

>  <SCORE.INTER.CONST>
1

>  <SCORE.INTER.POLAR>
0

>  <SCORE.INTER.REPUL>
0

>  <SCORE.INTER.ROT>
7

>  <SCORE.INTER.VDW>
0

>  <SCORE.INTER.norm>
0.427586

>  <SCORE.INTRA>
-3.71633

>  <SCORE.INTRA.DIHEDRAL>
0.510403

>  <SCORE.INTRA.DIHEDRAL.0>
1.91432

>  <SCORE.INTRA.POLAR>
-0.830148

>  <SCORE.INTRA.POLAR.0>
-0.108164

>  <SCORE.INTRA.REPUL>
0

>  <SCORE.INTRA.REPUL.0>
0

>  <SCORE.INTRA.VDW>
-1.14903

>  <SCORE.INTRA.VDW.0>
-0.903389

>  <SCORE.INTRA.norm>
-0.128149

>  <SCORE.RESTR>


>  <SCORE.RESTR.norm>
0

>  <SCORE.SYSTEM>
0

>  <SCORE.SYSTEM.CONST>
0

>  <SCORE.SYSTEM.DIHEDRAL>
0

>  <SCORE.SYSTEM.norm>
0

>  <SCORE.heavy>
29

>  <SCORE.norm>
0.299437

>  <TransFSReceptor>
receptor

>  <TransFSScore>
0.014094

$$$$

 OpenBabel01192115203D
libRbt.so/2013.1/901 2013/11/27
 22 24  0  0  0  0  0  0  0  0999 V2000
  204.5809  188.4441  243.5406 C   0  0  0  0  0  0  0  0  0  0  0  0
  205.3733  187.7151  244.6444 C   0  0  0  0  0  0  0  0  0  0  0  0
  206.7920  187.9929  244.5681 N   0  0  0  0  0  0  0  0  0  0  0  0
  207.4388  187.3841  243.5053 C   0  0  0  0  0  0  0  0  0  0  0  0
  207.6063  186.1963  243.3221 O   0  0  0  0  0  0  0  0  0  0  0  0
  207.5083  188.3348  242.3575 C   0  0  0  0  0  0  0  0  0  0  0  0
  208.4885  189.1541  242.1277 N   0  0  0  0  0  0  0  0  0  0  0  0
  207.9043  190.0938  241.3198 C   0  0  0  0  0  0  0  0  0  0  0  0
  206.5804  189.9181  241.1846 C   0  0  0  0  0  0  0  0  0  0  0  0
  206.2671  188.4964  241.5252 C   0  0  2  0  0  0  0  0  0  0  0  0
  204.9463  187.9996  242.1169 C   0  0  2  0  0  0  0  0  0  0  0  0
  203.8223  188.2409  241.1579 C   0  0  0  0  0  0  0  0  0  0  0  0
  203.1977  189.3574  240.9575 N   0  0  0  0  0  0  0  0  0  0  0  0
  202.2660  189.0383  239.9845 C   0  0  0  0  0  0  0  0  0  0  0  0
  202.2105  187.8134  239.5616 N   0  0  0  0  0  0  0  0  0  0  0  0
  203.2108  187.1982  240.2655 C   0  0  0  0  0  0  0  0  0  0  0  0
  203.5923  186.0499  240.2314 O   0  0  0  0  0  0  0  0  0  0  0  0
  201.4326  189.9975  239.4948 N   0  0  0  0  0  0  0  0  0  0  0  0
  208.9324  190.9174  240.0127 Br  0  0  0  0  0  0  0  0  0  0  0  0
  206.9982  188.9841  244.6575 H   0  0  0  0  0  0  0  0  0  0  0  0
  201.3614  190.8388  240.0555 H   0  0  0  0  0  0  0  0  0  0  0  0
  200.5537  189.6427  239.1415 H   0  0  0  0  0  0  0  0  0  0  0  0
  1 11  1  0  0  0  0
  1  2  1  0  0  0  0
  2  3  1  0  0  0  0
  3  4  1  0  0  0  0
  3 20  1  0  0  0  0
  4  5  2  0  0  0  0
  4  6  1  0  0  0  0
  6 10  1  0  0  0  0
  6  7  2  0  0  0  0
  7  8  1  0  0  0  0
  8  9  2  0  0  0  0
  8 19  1  0  0  0  0
 10  9  1  1  0  0  0
 10 11  1  0  0  0  0
 11 12  1  6  0  0  0
 12 16  1  0  0  0  0
 12 13  2  0  0  0  0
 13 14  1  0  0  0  0
 14 15  2  0  0  0  0
 14 18  1  0  0  0  0
 15 16  1  0  0  0  0
 16 17  2  0  0  0  0
 18 21  1  0  0  0  0
 18 22  1  0  0  0  0
M  END
>  <CHROM.1>
53.50761560,-16.71310862,206.07513648,188.92604808,241.34685751,-2.93137907
-0.29416657,-0.90563255

>  <Name>


>  <RI>
0

>  <Rbt.Current_Directory>
/data/dnb03/galaxy_db/job_working_directory/014/442/14442290/working

>  <Rbt.Executable>
rbdock ($Id: //depot/dev/client3/rdock/2013.1/src/exe/rbdock.cxx#4 $)

>  <Rbt.Library>
libRbt.so (2013.1, Build901 2013/11/27)

>  <Rbt.Parameter_File>
/usr/local/tools/_conda/envs/__rdock@2013.1-0/share/rdock-2013.1-1/data/scripts/dock.prm

>  <Rbt.Receptor>
receptor.prm

>  <SCORE>
6.70431

>  <SCORE.INTER>
7.4

>  <SCORE.INTER.CONST>
1

>  <SCORE.INTER.POLAR>
0

>  <SCORE.INTER.REPUL>
0

>  <SCORE.INTER.ROT>
2

>  <SCORE.INTER.VDW>
0

>  <SCORE.INTER.norm>
0.389474

>  <SCORE.INTRA>
-0.695692

>  <SCORE.INTRA.DIHEDRAL>
-1.76263

>  <SCORE.INTRA.DIHEDRAL.0>
2.41229

>  <SCORE.INTRA.POLAR>
0

>  <SCORE.INTRA.POLAR.0>
0

>  <SCORE.INTRA.REPUL>
0

>  <SCORE.INTRA.REPUL.0>
0

>  <SCORE.INTRA.VDW>
0.185622

>  <SCORE.INTRA.VDW.0>
-1.21934

>  <SCORE.INTRA.norm>
-0.0366153

>  <SCORE.RESTR>


>  <SCORE.RESTR.norm>
0

>  <SCORE.SYSTEM>
0

>  <SCORE.SYSTEM.CONST>
0

>  <SCORE.SYSTEM.DIHEDRAL>
0

>  <SCORE.SYSTEM.norm>
0

>  <SCORE.heavy>
19

>  <SCORE.norm>
0.352858

>  <TransFSReceptor>
receptor

>  <TransFSScore>
0.001319

$$$$

 OpenBabel01192115203D
libRbt.so/2013.1/901 2013/11/27
 18 21  0  0  0  0  0  0  0  0999 V2000
  217.1375  195.1618  251.5783 C   0  0  0  0  0  0  0  0  0  0  0  0
  218.2051  195.6916  250.7646 O   0  0  0  0  0  0  0  0  0  0  0  0
  217.7636  195.3665  249.5208 C   0  0  0  0  0  0  0  0  0  0  0  0
  216.5403  194.7418  249.5455 C   0  0  0  0  0  0  0  0  0  0  0  0
  216.0610  194.5880  250.8085 O   0  0  0  0  0  0  0  0  0  0  0  0
  215.9057  194.3410  248.3893 C   0  0  0  0  0  0  0  0  0  0  0  0
  216.5405  194.5820  247.1585 C   0  0  0  0  0  0  0  0  0  0  0  0
  217.8070  195.2133  247.1485 C   0  0  0  0  0  0  0  0  0  0  0  0
  218.4254  195.6152  248.3391 C   0  0  0  0  0  0  0  0  0  0  0  0
  215.8607  194.1935  245.9251 C   0  0  0  0  0  0  0  0  0  0  0  0
  214.6784  193.6205  245.7849 N   0  0  0  0  0  0  0  0  0  0  0  0
  214.5242  193.5169  244.4273 C   0  0  0  0  0  0  0  0  0  0  0  0
  213.4714  193.0064  243.6591 C   0  0  0  0  0  0  0  0  0  0  0  0
  213.6002  193.0355  242.2634 C   0  0  0  0  0  0  0  0  0  0  0  0
  214.7475  193.5596  241.6522 C   0  0  0  0  0  0  0  0  0  0  0  0
  215.8074  194.0772  242.4079 C   0  0  0  0  0  0  0  0  0  0  0  0
  215.6384  194.0309  243.7864 C   0  0  0  0  0  0  0  0  0  0  0  0
  216.5067  194.4688  244.7443 O   0  0  0  0  0  0  0  0  0  0  0  0
  1  5  1  0  0  0  0
  1  2  1  0  0  0  0
  2  3  1  0  0  0  0
  3  9  1  0  0  0  0
  3  4  2  0  0  0  0
  4  5  1  0  0  0  0
  4  6  1  0  0  0  0
  6  7  2  0  0  0  0
  7  8  1  0  0  0  0
  7 10  1  0  0  0  0
  8  9  2  0  0  0  0
 10 18  1  0  0  0  0
 10 11  2  0  0  0  0
 11 12  1  0  0  0  0
 12 17  1  0  0  0  0
 12 13  2  0  0  0  0
 13 14  1  0  0  0  0
 14 15  2  0  0  0  0
 15 16  1  0  0  0  0
 16 17  2  0  0  0  0
 17 18  1  0  0  0  0
M  END
>  <CHROM.1>
0.00208486,216.09667558,194.39795575,246.64682939,1.18624375,0.45126165,1.52319163

>  <Name>


>  <RI>
0

>  <Rbt.Current_Directory>
/data/dnb03/galaxy_db/job_working_directory/014/442/14442291/working

>  <Rbt.Executable>
rbdock ($Id: //depot/dev/client3/rdock/2013.1/src/exe/rbdock.cxx#4 $)

>  <Rbt.Library>
libRbt.so (2013.1, Build901 2013/11/27)

>  <Rbt.Parameter_File>
/usr/local/tools/_conda/envs/__rdock@2013.1-0/share/rdock-2013.1-1/data/scripts/dock.prm

>  <Rbt.Receptor>
receptor.prm

>  <SCORE>
6.37976

>  <SCORE.INTER>
6.4

>  <SCORE.INTER.CONST>
1

>  <SCORE.INTER.POLAR>
0

>  <SCORE.INTER.REPUL>
0

>  <SCORE.INTER.ROT>
1

>  <SCORE.INTER.VDW>
0

>  <SCORE.INTER.norm>
0.355556

>  <SCORE.INTRA>
-0.0202413

>  <SCORE.INTRA.DIHEDRAL>
-0.0454603

>  <SCORE.INTRA.DIHEDRAL.0>
0.0478444

>  <SCORE.INTRA.POLAR>
0

>  <SCORE.INTRA.POLAR.0>
0

>  <SCORE.INTRA.REPUL>
0

>  <SCORE.INTRA.REPUL.0>
0

>  <SCORE.INTRA.VDW>
0.0024889

>  <SCORE.INTRA.VDW.0>
-0.306307

>  <SCORE.INTRA.norm>
-0.00112452

>  <SCORE.RESTR>


>  <SCORE.RESTR.norm>
0

>  <SCORE.SYSTEM>
0

>  <SCORE.SYSTEM.CONST>
0

>  <SCORE.SYSTEM.DIHEDRAL>
0

>  <SCORE.SYSTEM.norm>
0

>  <SCORE.heavy>
18

>  <SCORE.norm>
0.354431

>  <TransFSReceptor>
receptor

>  <TransFSScore>
0.001347

$$$$

 OpenBabel01192115203D
libRbt.so/2013.1/901 2013/11/27
 12 12  0  0  0  0  0  0  0  0999 V2000
  192.5755  220.3638  256.1762 C   0  0  0  0  0  0  0  0  0  0  0  0
  192.5949  220.5819  254.7648 O   0  0  0  0  0  0  0  0  0  0  0  0
  192.5854  221.8946  254.4161 C   0  0  0  0  0  0  0  0  0  0  0  0
  192.5317  222.8425  255.1804 O   0  0  0  0  0  0  0  0  0  0  0  0
  192.5903  222.0289  252.9373 C   0  0  0  0  0  0  0  0  0  0  0  0
  192.6429  220.9135  252.0896 C   0  0  0  0  0  0  0  0  0  0  0  0
  192.6499  221.0871  250.7017 C   0  0  0  0  0  0  0  0  0  0  0  0
  192.5993  222.3747  250.1732 C   0  0  0  0  0  0  0  0  0  0  0  0
  192.5528  223.4879  251.0046 C   0  0  0  0  0  0  0  0  0  0  0  0
  192.5552  223.3171  252.3901 C   0  0  0  0  0  0  0  0  0  0  0  0
  192.5923  222.5888  248.8260 O   0  0  0  0  0  0  0  0  0  0  0  0
  192.6217  221.7330  248.3725 H   0  0  0  0  0  0  0  0  0  0  0  0
  1  2  1  0  0  0  0
  2  3  1  0  0  0  0
  3  4  2  0  0  0  0
  3  5  1  0  0  0  0
  5 10  1  0  0  0  0
  5  6  2  0  0  0  0
  6  7  1  0  0  0  0
  7  8  2  0  0  0  0
  8  9  1  0  0  0  0
  8 11  1  0  0  0  0
  9 10  2  0  0  0  0
 11 12  1  0  0  0  0
M  END
>  <CHROM.1>
-1.80947533,-1.92199179,0.32457594,192.58730164,221.93040068,252.64533407
-1.71009234,1.53882495,-1.20935918

>  <Name>


>  <RI>
0

>  <Rbt.Current_Directory>
/data/dnb03/galaxy_db/job_working_directory/014/442/14442292/working

>  <Rbt.Executable>
rbdock ($Id: //depot/dev/client3/rdock/2013.1/src/exe/rbdock.cxx#4 $)

>  <Rbt.Library>
libRbt.so (2013.1, Build901 2013/11/27)

>  <Rbt.Parameter_File>
/usr/local/tools/_conda/envs/__rdock@2013.1-0/share/rdock-2013.1-1/data/scripts/dock.prm

>  <Rbt.Receptor>
receptor.prm

>  <SCORE>
6.6395

>  <SCORE.INTER>
7.4

>  <SCORE.INTER.CONST>
1

>  <SCORE.INTER.POLAR>
0

>  <SCORE.INTER.REPUL>
0

>  <SCORE.INTER.ROT>
2

>  <SCORE.INTER.VDW>
0

>  <SCORE.INTER.norm>
0.672727

>  <SCORE.INTRA>
-0.760503

>  <SCORE.INTRA.DIHEDRAL>
-2.01754

>  <SCORE.INTRA.DIHEDRAL.0>
2.03759

>  <SCORE.INTRA.POLAR>
0

>  <SCORE.INTRA.POLAR.0>
0

>  <SCORE.INTRA.REPUL>
0

>  <SCORE.INTRA.REPUL.0>
0

>  <SCORE.INTRA.VDW>
0.248266

>  <SCORE.INTRA.VDW.0>
2.09271

>  <SCORE.INTRA.norm>
-0.0691366

>  <SCORE.RESTR>


>  <SCORE.RESTR.norm>
0

>  <SCORE.SYSTEM>
0

>  <SCORE.SYSTEM.CONST>
0

>  <SCORE.SYSTEM.DIHEDRAL>
0

>  <SCORE.SYSTEM.norm>
0

>  <SCORE.heavy>
11

>  <SCORE.norm>
0.603591

>  <TransFSReceptor>
receptor

>  <TransFSScore>
0.038827

$$$$

 OpenBabel01192115203D
libRbt.so/2013.1/901 2013/11/27
 17 17  0  0  0  0  0  0  0  0999 V2000
  196.1455  217.5041  256.9828 C   0  0  0  0  0  0  0  0  0  0  0  0
  195.4969  216.1816  257.3648 C   0  0  0  0  0  0  0  0  0  0  0  0
  195.1184  216.1366  258.7820 N   0  0  0  0  0  0  0  0  0  0  0  0
  195.3312  214.9130  259.5701 C   0  0  0  0  0  0  0  0  0  0  0  0
  195.8147  215.1781  260.9913 C   0  0  0  0  0  0  0  0  0  0  0  0
  194.0304  216.9393  259.1713 C   0  0  0  0  0  0  0  0  0  0  0  0
  194.2427  218.1319  259.8822 C   0  0  0  0  0  0  0  0  0  0  0  0
  193.1772  218.9506  260.2779 C   0  0  0  0  0  0  0  0  0  0  0  0
  191.8697  218.5862  259.9696 C   0  0  0  0  0  0  0  0  0  0  0  0
  191.6293  217.4288  259.2429 C   0  0  0  0  0  0  0  0  0  0  0  0
  192.6971  216.6118  258.8646 C   0  0  0  0  0  0  0  0  0  0  0  0
  190.7696  219.4026  260.3626 N   0  0  0  0  0  0  0  0  0  0  0  0
  190.4269  220.7440  259.3453 S   0  0  0  0  0  0  0  0  0  0  0  0
  191.6085  221.5825  259.5032 O   0  0  0  0  0  0  0  0  0  0  0  0
  190.2373  220.1564  258.0251 O   0  0  0  0  0  0  0  0  0  0  0  0
  189.2235  221.2702  259.9794 O   0  5  0  0  0  0  0  0  0  0  0  0
  190.8576  219.8033  261.2937 H   0  0  0  0  0  0  0  0  0  0  0  0
  1  2  1  0  0  0  0
  2  3  1  0  0  0  0
  3  4  1  0  0  0  0
  3  6  1  0  0  0  0
  4  5  1  0  0  0  0
  6 11  1  0  0  0  0
  6  7  2  0  0  0  0
  7  8  1  0  0  0  0
  8  9  2  0  0  0  0
  9 10  1  0  0  0  0
  9 12  1  0  0  0  0
 10 11  2  0  0  0  0
 12 13  1  0  0  0  0
 12 17  1  0  0  0  0
 13 14  2  0  0  0  0
 13 15  2  0  0  0  0
 13 16  1  0  0  0  0
M  CHG  1  16  -1
M  END
>  <CHROM.1>
-139.17557152,140.56738328,-104.73257138,81.72420288,-65.44693017,192.75224457
218.37677945,259.26892547,-0.34366057,0.68707914,-0.94737927

>  <Name>


>  <RI>
0

>  <Rbt.Current_Directory>
/data/dnb03/galaxy_db/job_working_directory/014/442/14442293/working

>  <Rbt.Executable>
rbdock ($Id: //depot/dev/client3/rdock/2013.1/src/exe/rbdock.cxx#4 $)

>  <Rbt.Library>
libRbt.so (2013.1, Build901 2013/11/27)

>  <Rbt.Parameter_File>
/usr/local/tools/_conda/envs/__rdock@2013.1-0/share/rdock-2013.1-1/data/scripts/dock.prm

>  <Rbt.Receptor>
receptor.prm

>  <SCORE>
8.06931

>  <SCORE.INTER>
10.4

>  <SCORE.INTER.CONST>
1

>  <SCORE.INTER.POLAR>
0

>  <SCORE.INTER.REPUL>
0

>  <SCORE.INTER.ROT>
5

>  <SCORE.INTER.VDW>
0

>  <SCORE.INTER.norm>
0.65

>  <SCORE.INTRA>
-2.33069

>  <SCORE.INTRA.DIHEDRAL>
0.698111

>  <SCORE.INTRA.DIHEDRAL.0>
2.28024

>  <SCORE.INTRA.POLAR>
0

>  <SCORE.INTRA.POLAR.0>
0

>  <SCORE.INTRA.REPUL>
0

>  <SCORE.INTRA.REPUL.0>
0

>  <SCORE.INTRA.VDW>
-2.67975

>  <SCORE.INTRA.VDW.0>
0.900699

>  <SCORE.INTRA.norm>
-0.145668

>  <SCORE.RESTR>


>  <SCORE.RESTR.norm>
0

>  <SCORE.SYSTEM>
0

>  <SCORE.SYSTEM.CONST>
0

>  <SCORE.SYSTEM.DIHEDRAL>
0

>  <SCORE.SYSTEM.norm>
0

>  <SCORE.heavy>
16

>  <SCORE.norm>
0.504332

>  <TransFSReceptor>
receptor

>  <TransFSScore>
0.000311

$$$$

 OpenBabel01192115203D
libRbt.so/2013.1/901 2013/11/27
 11 10  0  0  0  0  0  0  0  0999 V2000
  211.0157  182.0892  246.1205 C   0  0  0  0  0  0  0  0  0  0  0  0
  210.9478  180.8446  246.9988 C   0  0  0  0  0  0  0  0  0  0  0  0
  211.3269  179.6111  246.1812 C   0  0  0  0  0  0  0  0  0  0  0  0
  211.2867  178.2915  246.9740 C   0  0  0  0  0  0  0  0  0  0  0  0
  209.9038  178.0770  247.4292 N   0  0  0  0  0  0  0  0  0  0  0  0
  209.7002  177.3402  248.6989 C   0  0  1  0  0  0  0  0  0  0  0  0
  208.5283  177.8737  249.5364 C   0  0  0  0  0  0  0  0  0  0  0  0
  209.5715  175.8019  248.5667 C   0  0  0  0  0  0  0  0  0  0  0  0
  210.8246  175.1183  248.0335 C   0  0  0  0  0  0  0  0  0  0  0  0
  209.0833  177.8059  246.4304 N   0  0  0  0  0  0  0  0  0  0  0  0
  208.1358  178.5963  246.3661 O   0  0  0  0  0  0  0  0  0  0  0  0
  1  2  1  0  0  0  0
  2  3  1  0  0  0  0
  3  4  1  0  0  0  0
  4  5  1  0  0  0  0
  5  6  1  0  0  0  0
  5 10  1  0  0  0  0
  6  7  1  6  0  0  0
  6  8  1  0  0  0  0
  8  9  1  0  0  0  0
 10 11  2  0  0  0  0
M  END
>  <CHROM.1>
-179.80947959,61.97948021,-149.73486624,143.12684863,-123.01194565,63.66732160
210.00991937,178.32434908,247.38275684,1.33586169,0.26864391,-0.35038079

>  <Name>


>  <RI>
0

>  <Rbt.Current_Directory>
/data/dnb03/galaxy_db/job_working_directory/014/442/14442294/working

>  <Rbt.Executable>
rbdock ($Id: //depot/dev/client3/rdock/2013.1/src/exe/rbdock.cxx#4 $)

>  <Rbt.Library>
libRbt.so (2013.1, Build901 2013/11/27)

>  <Rbt.Parameter_File>
/usr/local/tools/_conda/envs/__rdock@2013.1-0/share/rdock-2013.1-1/data/scripts/dock.prm

>  <Rbt.Receptor>
receptor.prm

>  <SCORE>
10.1013

>  <SCORE.INTER>
11.4

>  <SCORE.INTER.CONST>
1

>  <SCORE.INTER.POLAR>
0

>  <SCORE.INTER.REPUL>
0

>  <SCORE.INTER.ROT>
6

>  <SCORE.INTER.VDW>
0

>  <SCORE.INTER.norm>
1.03636

>  <SCORE.INTRA>
-1.29866

>  <SCORE.INTRA.DIHEDRAL>
0.71259

>  <SCORE.INTRA.DIHEDRAL.0>
2.0043

>  <SCORE.INTRA.POLAR>
0

>  <SCORE.INTRA.POLAR.0>
0

>  <SCORE.INTRA.REPUL>
0

>  <SCORE.INTRA.REPUL.0>
0

>  <SCORE.INTRA.VDW>
-1.65495

>  <SCORE.INTRA.VDW.0>
0.50038

>  <SCORE.INTRA.norm>
-0.11806

>  <SCORE.RESTR>


>  <SCORE.RESTR.norm>
0

>  <SCORE.SYSTEM>
0

>  <SCORE.SYSTEM.CONST>
0

>  <SCORE.SYSTEM.DIHEDRAL>
0

>  <SCORE.SYSTEM.norm>
0

>  <SCORE.heavy>
11

>  <SCORE.norm>
0.918304

>  <TransFSReceptor>
receptor

>  <TransFSScore>
0.010609

$$$$

 OpenBabel01192115203D
libRbt.so/2013.1/901 2013/11/27
 41 44  0  0  0  0  0  0  0  0999 V2000
  190.5678  216.0737  249.7643 C   0  0  0  0  0  0  0  0  0  0  0  0
  190.4081  215.4128  250.9809 C   0  0  0  0  0  0  0  0  0  0  0  0
  191.5123  214.8406  251.6101 C   0  0  0  0  0  0  0  0  0  0  0  0
  192.7792  214.9268  251.0155 C   0  0  0  0  0  0  0  0  0  0  0  0
  192.9302  215.5481  249.7853 C   0  0  0  0  0  0  0  0  0  0  0  0
  191.8241  216.1357  249.1612 C   0  0  0  0  0  0  0  0  0  0  0  0
  194.2438  215.5741  249.1297 C   0  0  0  0  0  0  0  0  0  0  0  0
  194.3113  215.9908  247.9793 O   0  0  0  0  0  0  0  0  0  0  0  0
  195.4384  215.0300  249.8138 C   0  0  0  0  0  0  0  0  0  0  0  0
  195.2862  214.4060  251.0687 C   0  0  0  0  0  0  0  0  0  0  0  0
  193.9582  214.4345  251.7374 C   0  0  0  0  0  0  0  0  0  0  0  0
  193.8162  214.1729  252.9259 O   0  0  0  0  0  0  0  0  0  0  0  0
  196.3717  213.7685  251.7033 C   0  0  0  0  0  0  0  0  0  0  0  0
  197.6240  213.8635  251.0716 C   0  0  0  0  0  0  0  0  0  0  0  0
  197.7903  214.5392  249.8544 C   0  0  0  0  0  0  0  0  0  0  0  0
  196.7034  215.1022  249.1882 C   0  0  0  0  0  0  0  0  0  0  0  0
  196.8746  215.6012  247.8755 N   0  0  0  0  0  0  0  0  0  0  0  0
  197.2369  216.9305  247.5168 C   0  0  0  0  0  0  0  0  0  0  0  0
  196.3015  217.9686  247.4541 C   0  0  0  0  0  0  0  0  0  0  0  0
  196.6762  219.2045  246.9266 C   0  0  0  0  0  0  0  0  0  0  0  0
  197.9818  219.4481  246.5052 C   0  0  0  0  0  0  0  0  0  0  0  0
  198.9158  218.4170  246.5682 C   0  0  0  0  0  0  0  0  0  0  0  0
  198.5381  217.1616  247.0513 C   0  0  0  0  0  0  0  0  0  0  0  0
  195.4515  220.4876  246.7431 S   0  0  0  0  0  0  0  0  0  0  0  0
  194.3281  220.1370  247.5809 O   0  0  0  0  0  0  0  0  0  0  0  0
  196.1401  221.7503  246.9121 O   0  0  0  0  0  0  0  0  0  0  0  0
  194.9206  220.3653  245.0491 C   0  0  0  0  0  0  0  0  0  0  0  0
  194.0583  219.1442  244.8293 C   0  0  0  0  0  0  0  0  0  0  0  0
  194.8129  217.9782  245.1017 O   0  0  0  0  0  0  0  0  0  0  0  0
  194.0369  216.5493  244.9390 S   0  0  0  0  0  0  0  0  0  0  0  0
  192.8415  216.7181  245.7625 O   0  0  0  0  0  0  0  0  0  0  0  0
  193.7512  216.4760  243.5066 O   0  0  0  0  0  0  0  0  0  0  0  0
  194.9972  215.5739  245.4307 O   0  5  0  0  0  0  0  0  0  0  0  0
  199.1428  213.1570  251.7712 S   0  0  0  0  0  0  0  0  0  0  0  0
  199.7371  212.5901  250.5668 O   0  0  0  0  0  0  0  0  0  0  0  0
  199.7729  214.3400  252.3417 O   0  0  0  0  0  0  0  0  0  0  0  0
  198.6359  212.1845  252.7378 O   0  5  0  0  0  0  0  0  0  0  0  0
  196.1303  212.8395  252.7363 N   0  0  0  0  0  0  0  0  0  0  0  0
  196.0952  215.3262  247.2575 H   0  0  0  0  0  0  0  0  0  0  0  0
  195.7133  213.2440  253.5760 H   0  0  0  0  0  0  0  0  0  0  0  0
  197.0103  212.3297  252.9792 H   0  0  0  0  0  0  0  0  0  0  0  0
  1  6  1  0  0  0  0
  1  2  2  0  0  0  0
  2  3  1  0  0  0  0
  3  4  2  0  0  0  0
  4 11  1  0  0  0  0
  4  5  1  0  0  0  0
  5  6  2  0  0  0  0
  5  7  1  0  0  0  0
  7  8  2  0  0  0  0
  7  9  1  0  0  0  0
  9 16  1  0  0  0  0
  9 10  2  0  0  0  0
 10 11  1  0  0  0  0
 10 13  1  0  0  0  0
 11 12  2  0  0  0  0
 13 14  2  0  0  0  0
 13 38  1  0  0  0  0
 14 15  1  0  0  0  0
 14 34  1  0  0  0  0
 15 16  2  0  0  0  0
 16 17  1  0  0  0  0
 17 18  1  0  0  0  0
 17 39  1  0  0  0  0
 18 23  1  0  0  0  0
 18 19  2  0  0  0  0
 19 20  1  0  0  0  0
 20 21  2  0  0  0  0
 20 24  1  0  0  0  0
 21 22  1  0  0  0  0
 22 23  2  0  0  0  0
 24 25  2  0  0  0  0
 24 26  2  0  0  0  0
 24 27  1  0  0  0  0
 27 28  1  0  0  0  0
 28 29  1  0  0  0  0
 29 30  1  0  0  0  0
 30 31  2  0  0  0  0
 30 32  2  0  0  0  0
 30 33  1  0  0  0  0
 34 35  2  0  0  0  0
 34 36  2  0  0  0  0
 34 37  1  0  0  0  0
 38 40  1  0  0  0  0
 38 41  1  0  0  0  0
M  CHG  2  33  -1  37  -1
M  END
>  <CHROM.1>
-65.56551433,137.99484822,95.75456931,-81.99034631,17.84028400,72.76755787
-62.36930767,179.12995923,-52.75104467,195.54130571,216.24238232,248.61806006
1.83997186,0.00682700,-0.85155197

>  <Name>


>  <RI>
0

>  <Rbt.Current_Directory>
/data/dnb03/galaxy_db/job_working_directory/014/442/14442295/working

>  <Rbt.Executable>
rbdock ($Id: //depot/dev/client3/rdock/2013.1/src/exe/rbdock.cxx#4 $)

>  <Rbt.Library>
libRbt.so (2013.1, Build901 2013/11/27)

>  <Rbt.Parameter_File>
/usr/local/tools/_conda/envs/__rdock@2013.1-0/share/rdock-2013.1-1/data/scripts/dock.prm

>  <Rbt.Receptor>
receptor.prm

>  <SCORE>
7.82127

>  <SCORE.INTER>
14.4

>  <SCORE.INTER.CONST>
1

>  <SCORE.INTER.POLAR>
0

>  <SCORE.INTER.REPUL>
0

>  <SCORE.INTER.ROT>
9

>  <SCORE.INTER.VDW>
0

>  <SCORE.INTER.norm>
0.378947

>  <SCORE.INTRA>
-6.57873

>  <SCORE.INTRA.DIHEDRAL>
-0.0803939

>  <SCORE.INTRA.DIHEDRAL.0>
4.20305

>  <SCORE.INTRA.POLAR>
-1.07987

>  <SCORE.INTRA.POLAR.0>
-0.998488

>  <SCORE.INTRA.REPUL>
0

>  <SCORE.INTRA.REPUL.0>
0

>  <SCORE.INTRA.VDW>
-2.86698

>  <SCORE.INTRA.VDW.0>
-2.6045

>  <SCORE.INTRA.norm>
-0.173124

>  <SCORE.RESTR>


>  <SCORE.RESTR.norm>
0

>  <SCORE.SYSTEM>
0

>  <SCORE.SYSTEM.CONST>
0

>  <SCORE.SYSTEM.DIHEDRAL>
0

>  <SCORE.SYSTEM.norm>
0

>  <SCORE.heavy>
38

>  <SCORE.norm>
0.205823

>  <TransFSReceptor>
receptor

>  <TransFSScore>
0.000696

$$$$

 OpenBabel01192115203D
libRbt.so/2013.1/901 2013/11/27
 34 36  0  0  0  0  0  0  0  0999 V2000
  225.8209  184.2749  244.3495 C   0  0  0  0  0  0  0  0  0  0  0  0
  224.7494  183.2541  244.7371 C   0  0  0  0  0  0  0  0  0  0  0  0
  225.2757  181.8928  244.6722 N   0  0  0  0  0  0  0  0  0  0  0  0
  224.2319  180.9212  244.9365 C   0  0  0  0  0  0  0  0  0  0  0  0
  224.6607  179.5619  244.6718 N   0  0  0  0  0  0  0  0  0  0  0  0
  224.2098  179.0171  243.4006 C   0  0  0  0  0  0  0  0  0  0  0  0
  225.0248  179.4337  242.2743 N   0  0  0  0  0  0  0  0  0  0  0  0
  224.8901  178.5381  241.1320 C   0  0  0  0  0  0  0  0  0  0  0  0
  226.0773  178.5683  240.1558 C   0  0  0  0  0  0  0  0  0  0  0  0
  226.1978  179.8476  239.3274 C   0  0  0  0  0  0  0  0  0  0  0  0
  226.9820  180.8660  240.0232 N   0  0  0  0  0  0  0  0  0  0  0  0
  226.9712  182.1118  239.2777 C   0  0  0  0  0  0  0  0  0  0  0  0
  227.6101  183.1991  239.9935 N   0  0  0  0  0  0  0  0  0  0  0  0
  226.6965  184.0965  240.6853 C   0  0  0  0  0  0  0  0  0  0  0  0
  226.2778  183.5983  241.9772 N   0  0  0  0  0  0  0  0  0  0  0  0
  225.8231  184.6631  242.8635 C   0  0  0  0  0  0  0  0  0  0  0  0
  228.8542  182.9364  240.7113 C   0  0  0  0  0  0  0  0  0  0  0  0
  229.6170  184.1371  241.2394 C   0  0  0  0  0  0  0  0  0  0  0  0
  229.6789  184.3317  242.6305 C   0  0  0  0  0  0  0  0  0  0  0  0
  230.2873  185.4659  243.1710 C   0  0  0  0  0  0  0  0  0  0  0  0
  230.8398  186.4232  242.3271 C   0  0  0  0  0  0  0  0  0  0  0  0
  230.7828  186.2488  240.9453 C   0  0  0  0  0  0  0  0  0  0  0  0
  230.1610  185.1218  240.4044 C   0  0  0  0  0  0  0  0  0  0  0  0
  226.0178  179.1678  245.0378 C   0  0  0  0  0  0  0  0  0  0  0  0
  226.3612  177.6924  244.9489 C   0  0  0  0  0  0  0  0  0  0  0  0
  227.2568  177.2754  243.9478 C   0  0  0  0  0  0  0  0  0  0  0  0
  227.5246  175.9220  243.7404 C   0  0  0  0  0  0  0  0  0  0  0  0
  226.9002  174.9627  244.5337 C   0  0  0  0  0  0  0  0  0  0  0  0
  226.0107  175.3567  245.5337 C   0  0  0  0  0  0  0  0  0  0  0  0
  225.7336  176.7130  245.7309 C   0  0  0  0  0  0  0  0  0  0  0  0
  225.9869  181.7818  245.3912 H   0  0  0  0  0  0  0  0  0  0  0  0
  225.9963  179.5537  242.5361 H   0  0  0  0  0  0  0  0  0  0  0  0
  227.9468  180.5498  240.0821 H   0  0  0  0  0  0  0  0  0  0  0  0
  226.9986  183.0368  242.4171 H   0  0  0  0  0  0  0  0  0  0  0  0
  1 16  1  0  0  0  0
  1  2  1  0  0  0  0
  2  3  1  0  0  0  0
  3  4  1  0  0  0  0
  3 31  1  0  0  0  0
  4  5  1  0  0  0  0
  5  6  1  0  0  0  0
  5 24  1  0  0  0  0
  6  7  1  0  0  0  0
  7  8  1  0  0  0  0
  7 32  1  0  0  0  0
  8  9  1  0  0  0  0
  9 10  1  0  0  0  0
 10 11  1  0  0  0  0
 11 12  1  0  0  0  0
 11 33  1  0  0  0  0
 12 13  1  0  0  0  0
 13 14  1  0  0  0  0
 13 17  1  0  0  0  0
 14 15  1  0  0  0  0
 15 16  1  0  0  0  0
 15 34  1  0  0  0  0
 17 18  1  0  0  0  0
 18 23  1  0  0  0  0
 18 19  2  0  0  0  0
 19 20  1  0  0  0  0
 20 21  2  0  0  0  0
 21 22  1  0  0  0  0
 22 23  2  0  0  0  0
 24 25  1  0  0  0  0
 25 30  1  0  0  0  0
 25 26  2  0  0  0  0
 26 27  1  0  0  0  0
 27 28  2  0  0  0  0
 28 29  1  0  0  0  0
 29 30  2  0  0  0  0
M  END
>  <CHROM.1>
170.65628276,169.53709922,111.09303536,110.67679872,226.86615061,181.19961211
242.62534919,0.64142442,1.09651369,0.52793592

>  <Name>


>  <RI>
0

>  <Rbt.Current_Directory>
/data/dnb03/galaxy_db/job_working_directory/014/442/14442296/working

>  <Rbt.Executable>
rbdock ($Id: //depot/dev/client3/rdock/2013.1/src/exe/rbdock.cxx#4 $)

>  <Rbt.Library>
libRbt.so (2013.1, Build901 2013/11/27)

>  <Rbt.Parameter_File>
/usr/local/tools/_conda/envs/__rdock@2013.1-0/share/rdock-2013.1-1/data/scripts/dock.prm

>  <Rbt.Receptor>
receptor.prm

>  <SCORE>
8.63

>  <SCORE.INTER>
9.4

>  <SCORE.INTER.CONST>
1

>  <SCORE.INTER.POLAR>
0

>  <SCORE.INTER.REPUL>
0

>  <SCORE.INTER.ROT>
4

>  <SCORE.INTER.VDW>
0

>  <SCORE.INTER.norm>
0.313333

>  <SCORE.INTRA>
-0.769999

>  <SCORE.INTRA.DIHEDRAL>
-0.584477

>  <SCORE.INTRA.DIHEDRAL.0>
2.43593

>  <SCORE.INTRA.POLAR>
0

>  <SCORE.INTRA.POLAR.0>
0

>  <SCORE.INTRA.REPUL>
0

>  <SCORE.INTRA.REPUL.0>
0

>  <SCORE.INTRA.VDW>
-0.477761

>  <SCORE.INTRA.VDW.0>
-2.09168

>  <SCORE.INTRA.norm>
-0.0256666

>  <SCORE.RESTR>


>  <SCORE.RESTR.norm>
0

>  <SCORE.SYSTEM>
0

>  <SCORE.SYSTEM.CONST>
0

>  <SCORE.SYSTEM.DIHEDRAL>
0

>  <SCORE.SYSTEM.norm>
0

>  <SCORE.heavy>
30

>  <SCORE.norm>
0.287667

>  <TransFSReceptor>
receptor

>  <TransFSScore>
0.010601

$$$$

 OpenBabel01192115203D
libRbt.so/2013.1/901 2013/11/27
 18 18  0  0  0  0  0  0  0  0999 V2000
  221.6812  189.0334  247.8046 C   0  0  0  0  0  0  0  0  0  0  0  0
  220.3014  188.4928  247.5115 C   0  0  0  0  0  0  0  0  0  0  0  0
  220.1510  187.5141  246.4246 N   0  0  0  0  0  0  0  0  0  0  0  0
  220.1382  187.0579  247.7733 N   0  0  0  0  0  0  0  0  0  0  0  0
  218.8059  186.5862  248.1993 C   0  0  0  0  0  0  0  0  0  0  0  0
  218.7891  185.0973  248.3536 C   0  0  0  0  0  0  0  0  0  0  0  0
  219.0390  184.4072  247.0531 C   0  0  0  0  0  0  0  0  0  0  0  0
  218.1619  184.7263  246.0774 F   0  0  0  0  0  0  0  0  0  0  0  0
  220.2607  184.5822  246.5195 F   0  0  0  0  0  0  0  0  0  0  0  0
  218.9167  183.0637  247.2414 F   0  0  0  0  0  0  0  0  0  0  0  0
  219.7409  184.6884  249.4302 C   0  0  0  0  0  0  0  0  0  0  0  0
  219.4916  185.2530  250.6300 F   0  0  0  0  0  0  0  0  0  0  0  0
  219.6310  183.3446  249.6183 F   0  0  0  0  0  0  0  0  0  0  0  0
  221.0424  184.9111  249.1793 F   0  0  0  0  0  0  0  0  0  0  0  0
  218.4706  187.1759  249.3733 F   0  0  0  0  0  0  0  0  0  0  0  0
  217.8539  186.9395  247.2924 F   0  0  0  0  0  0  0  0  0  0  0  0
  219.2027  189.5120  247.6593 C   0  0  0  0  0  0  0  0  0  0  0  0
  221.0574  187.3272  245.9893 H   0  0  0  0  0  0  0  0  0  0  0  0
  1  2  1  0  0  0  0
  2  4  1  0  0  0  0
  2  3  1  0  0  0  0
  2 17  1  0  0  0  0
  3  4  1  0  0  0  0
  3 18  1  0  0  0  0
  4  5  1  0  0  0  0
  5  6  1  0  0  0  0
  5 15  1  0  0  0  0
  5 16  1  0  0  0  0
  6  7  1  0  0  0  0
  6 11  1  0  0  0  0
  7  8  1  0  0  0  0
  7  9  1  0  0  0  0
  7 10  1  0  0  0  0
 11 12  1  0  0  0  0
 11 13  1  0  0  0  0
 11 14  1  0  0  0  0
M  END
>  <CHROM.1>
176.98993233,-63.57574474,-57.63835401,57.52135094,219.48565617,185.90468709
248.03051140,-1.16556613,1.25193315,2.60562015

>  <Name>


>  <RI>
0

>  <Rbt.Current_Directory>
/data/dnb03/galaxy_db/job_working_directory/014/442/14442297/working

>  <Rbt.Executable>
rbdock ($Id: //depot/dev/client3/rdock/2013.1/src/exe/rbdock.cxx#4 $)

>  <Rbt.Library>
libRbt.so (2013.1, Build901 2013/11/27)

>  <Rbt.Parameter_File>
/usr/local/tools/_conda/envs/__rdock@2013.1-0/share/rdock-2013.1-1/data/scripts/dock.prm

>  <Rbt.Receptor>
receptor.prm

>  <SCORE>
-0.699093

>  <SCORE.INTER>
9.4

>  <SCORE.INTER.CONST>
1

>  <SCORE.INTER.POLAR>
0

>  <SCORE.INTER.REPUL>
0

>  <SCORE.INTER.ROT>
4

>  <SCORE.INTER.VDW>
0

>  <SCORE.INTER.norm>
0.552941

>  <SCORE.INTRA>
-10.0991

>  <SCORE.INTRA.DIHEDRAL>
-8.23252

>  <SCORE.INTRA.DIHEDRAL.0>
9.75458

>  <SCORE.INTRA.POLAR>
0

>  <SCORE.INTRA.POLAR.0>
0

>  <SCORE.INTRA.REPUL>
0

>  <SCORE.INTRA.REPUL.0>
0

>  <SCORE.INTRA.VDW>
-5.98283

>  <SCORE.INTRA.VDW.0>
3.65054

>  <SCORE.INTRA.norm>
-0.594064

>  <SCORE.RESTR>


>  <SCORE.RESTR.norm>
0

>  <SCORE.SYSTEM>
0

>  <SCORE.SYSTEM.CONST>
0

>  <SCORE.SYSTEM.DIHEDRAL>
0

>  <SCORE.SYSTEM.norm>
0

>  <SCORE.heavy>
17

>  <SCORE.norm>
-0.0411231

>  <TransFSReceptor>
receptor

>  <TransFSScore>
0.017364

$$$$

 OpenBabel01192115203D
libRbt.so/2013.1/901 2013/11/27
  8  7  0  0  0  0  0  0  0  0999 V2000
  189.6144  222.0233  260.7753 C   0  0  0  0  0  0  0  0  0  0  0  0
  188.4950  222.3519  261.6507 N   0  0  0  0  0  0  0  0  0  0  0  0
  188.9721  222.8100  262.9570 C   0  0  0  0  0  0  0  0  0  0  0  0
  187.5367  223.3064  261.0582 C   0  0  0  0  0  0  0  0  0  0  0  0
  186.7033  222.7334  259.9148 C   0  0  0  0  0  0  0  0  0  0  0  0
  186.8698  223.0043  258.7332 O   0  0  0  0  0  0  0  0  0  0  0  0
  185.7588  221.8494  260.3233 O   0  0  0  0  0  0  0  0  0  0  0  0
  185.2377  221.4784  259.5859 H   0  0  0  0  0  0  0  0  0  0  0  0
  1  2  1  0  0  0  0
  2  3  1  0  0  0  0
  2  4  1  0  0  0  0
  4  5  1  0  0  0  0
  5  6  2  0  0  0  0
  5  7  1  0  0  0  0
  7  8  1  0  0  0  0
M  END
>  <CHROM.1>
70.28844344,-106.15082062,-179.24404477,187.68018961,222.55976824,260.75194411
-0.75044150,-0.04285380,-1.52873493

>  <Name>


>  <RI>
0

>  <Rbt.Current_Directory>
/data/dnb03/galaxy_db/job_working_directory/014/442/14442298/working

>  <Rbt.Executable>
rbdock ($Id: //depot/dev/client3/rdock/2013.1/src/exe/rbdock.cxx#4 $)

>  <Rbt.Library>
libRbt.so (2013.1, Build901 2013/11/27)

>  <Rbt.Parameter_File>
/usr/local/tools/_conda/envs/__rdock@2013.1-0/share/rdock-2013.1-1/data/scripts/dock.prm

>  <Rbt.Receptor>
receptor.prm

>  <SCORE>
5.78653

>  <SCORE.INTER>
7.4

>  <SCORE.INTER.CONST>
1

>  <SCORE.INTER.POLAR>
0

>  <SCORE.INTER.REPUL>
0

>  <SCORE.INTER.ROT>
2

>  <SCORE.INTER.VDW>
0

>  <SCORE.INTER.norm>
1.05714

>  <SCORE.INTRA>
-1.61347

>  <SCORE.INTRA.DIHEDRAL>
0.265566

>  <SCORE.INTRA.DIHEDRAL.0>
1.34925

>  <SCORE.INTRA.POLAR>
0

>  <SCORE.INTRA.POLAR.0>
0

>  <SCORE.INTRA.REPUL>
0

>  <SCORE.INTRA.REPUL.0>
0

>  <SCORE.INTRA.VDW>
-1.74625

>  <SCORE.INTRA.VDW.0>
1.321

>  <SCORE.INTRA.norm>
-0.230496

>  <SCORE.RESTR>


>  <SCORE.RESTR.norm>
0

>  <SCORE.SYSTEM>
0

>  <SCORE.SYSTEM.CONST>
0

>  <SCORE.SYSTEM.DIHEDRAL>
0

>  <SCORE.SYSTEM.norm>
0

>  <SCORE.heavy>
7

>  <SCORE.norm>
0.826647

>  <TransFSReceptor>
receptor

>  <TransFSScore>
0.034011

$$$$

 OpenBabel01192115203D
libRbt.so/2013.1/901 2013/11/27
 19 20  0  0  0  0  0  0  0  0999 V2000
  191.9744  209.6122  258.9704 C   0  0  0  0  0  0  0  0  0  0  0  0
  192.8850  210.3483  259.7240 C   0  0  0  0  0  0  0  0  0  0  0  0
  193.7687  211.2262  259.0918 C   0  0  0  0  0  0  0  0  0  0  0  0
  193.7544  211.3834  257.6965 C   0  0  0  0  0  0  0  0  0  0  0  0
  192.8541  210.6109  256.9463 C   0  0  0  0  0  0  0  0  0  0  0  0
  191.9635  209.7370  257.5818 C   0  0  0  0  0  0  0  0  0  0  0  0
  194.6351  212.4293  257.0387 C   0  0  0  0  0  0  0  0  0  0  0  0
  193.9326  213.4587  256.2683 N   0  0  0  0  0  0  0  0  0  0  0  0
  193.6377  214.6603  256.8679 C   0  0  0  0  0  0  0  0  0  0  0  0
  193.1440  215.6842  256.1824 C   0  0  0  0  0  0  0  0  0  0  0  0
  192.8427  215.5296  254.7477 C   0  0  0  0  0  0  0  0  0  0  0  0
  192.3431  216.4925  254.1679 O   0  0  0  0  0  0  0  0  0  0  0  0
  193.0868  214.2776  254.2125 N   0  0  0  0  0  0  0  0  0  0  0  0
  193.7071  213.2329  254.8997 C   0  0  0  0  0  0  0  0  0  0  0  0
  194.0163  212.1598  254.3743 O   0  0  0  0  0  0  0  0  0  0  0  0
  192.7179  214.0787  252.8030 C   0  0  0  0  0  0  0  0  0  0  0  0
  191.3743  213.3739  252.5332 C   0  0  0  0  0  0  0  0  0  0  0  0
  190.6819  213.8298  251.5753 O   0  0  0  0  0  0  0  0  0  0  0  0
  191.1416  212.3806  253.2830 O   0  5  0  0  0  0  0  0  0  0  0  0
  1  6  1  0  0  0  0
  1  2  2  0  0  0  0
  2  3  1  0  0  0  0
  3  4  2  0  0  0  0
  4  5  1  0  0  0  0
  4  7  1  0  0  0  0
  5  6  2  0  0  0  0
  7  8  1  0  0  0  0
  8 14  1  0  0  0  0
  8  9  1  0  0  0  0
  9 10  2  0  0  0  0
 10 11  1  0  0  0  0
 11 12  2  0  0  0  0
 11 13  1  0  0  0  0
 13 14  1  0  0  0  0
 13 16  1  0  0  0  0
 14 15  2  0  0  0  0
 16 17  1  0  0  0  0
 17 18  2  0  0  0  0
 17 19  1  0  0  0  0
M  CHG  1  19  -1
M  END
>  <CHROM.1>
-119.88353233,95.63980659,-99.10760026,140.06561809,192.83901084,212.91034855
255.62710415,1.28053166,1.02851442,2.45602095

>  <Name>


>  <RI>
0

>  <Rbt.Current_Directory>
/data/dnb03/galaxy_db/job_working_directory/014/442/14442299/working

>  <Rbt.Executable>
rbdock ($Id: //depot/dev/client3/rdock/2013.1/src/exe/rbdock.cxx#4 $)

>  <Rbt.Library>
libRbt.so (2013.1, Build901 2013/11/27)

>  <Rbt.Parameter_File>
/usr/local/tools/_conda/envs/__rdock@2013.1-0/share/rdock-2013.1-1/data/scripts/dock.prm

>  <Rbt.Receptor>
receptor.prm

>  <SCORE>
9.1911

>  <SCORE.INTER>
9.4

>  <SCORE.INTER.CONST>
1

>  <SCORE.INTER.POLAR>
0

>  <SCORE.INTER.REPUL>
0

>  <SCORE.INTER.ROT>
4

>  <SCORE.INTER.VDW>
0

>  <SCORE.INTER.norm>
0.494737

>  <SCORE.INTRA>
-0.208902

>  <SCORE.INTRA.DIHEDRAL>
-0.189495

>  <SCORE.INTRA.DIHEDRAL.0>
6.42593

>  <SCORE.INTRA.POLAR>
0

>  <SCORE.INTRA.POLAR.0>
0

>  <SCORE.INTRA.REPUL>
0

>  <SCORE.INTRA.REPUL.0>
0

>  <SCORE.INTRA.VDW>
-0.114155

>  <SCORE.INTRA.VDW.0>
-2.25362

>  <SCORE.INTRA.norm>
-0.0109948

>  <SCORE.RESTR>


>  <SCORE.RESTR.norm>
0

>  <SCORE.SYSTEM>
0

>  <SCORE.SYSTEM.CONST>
0

>  <SCORE.SYSTEM.DIHEDRAL>
0

>  <SCORE.SYSTEM.norm>
0

>  <SCORE.heavy>
19

>  <SCORE.norm>
0.483742

>  <TransFSReceptor>
receptor

>  <TransFSScore>
0.073910

$$$$

 OpenBabel01192115203D
libRbt.so/2013.1/901 2013/11/27
 19 19  0  0  0  0  0  0  0  0999 V2000
  199.0525  214.3254  259.3222 C   0  0  0  0  0  0  0  0  0  0  0  0
  199.7510  213.5382  260.4315 C   0  0  1  0  0  0  0  0  0  0  0  0
  199.5555  212.0224  260.2525 C   0  0  0  0  0  0  0  0  0  0  0  0
  200.4900  211.2458  260.0404 O   0  0  0  0  0  0  0  0  0  0  0  0
  198.1862  211.4406  260.3487 C   0  0  0  0  0  0  0  0  0  0  0  0
  197.0799  212.2115  260.7118 C   0  0  0  0  0  0  0  0  0  0  0  0
  195.8203  211.6125  260.7759 C   0  0  0  0  0  0  0  0  0  0  0  0
  195.6568  210.2573  260.4912 C   0  0  0  0  0  0  0  0  0  0  0  0
  196.7609  209.4886  260.1265 C   0  0  0  0  0  0  0  0  0  0  0  0
  198.0210  210.0804  260.0444 C   0  0  0  0  0  0  0  0  0  0  0  0
  194.4516  212.5641  261.2039 Cl  0  0  0  0  0  0  0  0  0  0  0  0
  201.1575  213.9204  260.6965 N   0  0  0  0  0  0  0  0  0  0  0  0
  201.7456  213.8767  262.0602 C   0  0  0  0  0  0  0  0  0  0  0  0
  203.0700  214.6529  262.1465 C   0  0  0  0  0  0  0  0  0  0  0  0
  200.8047  214.3448  263.1804 C   0  0  0  0  0  0  0  0  0  0  0  0
  202.0596  212.3740  262.3595 C   0  0  0  0  0  0  0  0  0  0  0  0
  202.7785  211.7642  261.2886 O   0  0  0  0  0  0  0  0  0  0  0  0
  201.3035  214.8622  260.3317 H   0  0  0  0  0  0  0  0  0  0  0  0
  202.1544  211.6981  260.5446 H   0  0  0  0  0  0  0  0  0  0  0  0
  2  1  1  6  0  0  0
  2  3  1  0  0  0  0
  2 12  1  0  0  0  0
  3  4  2  0  0  0  0
  3  5  1  0  0  0  0
  5 10  1  0  0  0  0
  5  6  2  0  0  0  0
  6  7  1  0  0  0  0
  7  8  2  0  0  0  0
  7 11  1  0  0  0  0
  8  9  1  0  0  0  0
  9 10  2  0  0  0  0
 12 13  1  0  0  0  0
 12 18  1  0  0  0  0
 13 14  1  0  0  0  0
 13 15  1  0  0  0  0
 13 16  1  0  0  0  0
 16 17  1  0  0  0  0
 17 19  1  0  0  0  0
M  END
>  <CHROM.1>
116.37419517,145.88739260,-5.63595985,-164.98545948,49.31544625,-69.49108945
198.92897968,212.40207926,260.94768555,0.31866292,-0.03831416,0.34844564

>  <Name>


>  <RI>
0

>  <Rbt.Current_Directory>
/data/dnb03/galaxy_db/job_working_directory/014/442/14442300/working

>  <Rbt.Executable>
rbdock ($Id: //depot/dev/client3/rdock/2013.1/src/exe/rbdock.cxx#4 $)

>  <Rbt.Library>
libRbt.so (2013.1, Build901 2013/11/27)

>  <Rbt.Parameter_File>
/usr/local/tools/_conda/envs/__rdock@2013.1-0/share/rdock-2013.1-1/data/scripts/dock.prm

>  <Rbt.Receptor>
receptor.prm

>  <SCORE>
4.87197

>  <SCORE.INTER>
10.4

>  <SCORE.INTER.CONST>
1

>  <SCORE.INTER.POLAR>
0

>  <SCORE.INTER.REPUL>
0

>  <SCORE.INTER.ROT>
5

>  <SCORE.INTER.VDW>
0

>  <SCORE.INTER.norm>
0.611765

>  <SCORE.INTRA>
-5.52803

>  <SCORE.INTRA.DIHEDRAL>
-3.69921

>  <SCORE.INTRA.DIHEDRAL.0>
7.63992

>  <SCORE.INTRA.POLAR>
-0.902337

>  <SCORE.INTRA.POLAR.0>
0

>  <SCORE.INTRA.REPUL>
0

>  <SCORE.INTRA.REPUL.0>
0

>  <SCORE.INTRA.VDW>
-0.610478

>  <SCORE.INTRA.VDW.0>
1.03571

>  <SCORE.INTRA.norm>
-0.325178

>  <SCORE.RESTR>


>  <SCORE.RESTR.norm>
0

>  <SCORE.SYSTEM>
0

>  <SCORE.SYSTEM.CONST>
0

>  <SCORE.SYSTEM.DIHEDRAL>
0

>  <SCORE.SYSTEM.norm>
0

>  <SCORE.heavy>
17

>  <SCORE.norm>
0.286587

>  <TransFSReceptor>
receptor

>  <TransFSScore>
0.001963

$$$$

 OpenBabel01192115203D
libRbt.so/2013.1/901 2013/11/27
 16 17  0  0  0  0  0  0  0  0999 V2000
  188.0890  207.0265  252.5632 C   0  0  0  0  0  0  0  0  0  0  0  0
  188.1501  205.6552  252.3451 C   0  0  0  0  0  0  0  0  0  0  0  0
  188.7374  205.1534  251.1766 C   0  0  0  0  0  0  0  0  0  0  0  0
  189.2545  206.0079  250.1830 C   0  0  0  0  0  0  0  0  0  0  0  0
  189.1466  207.3911  250.4194 C   0  0  0  0  0  0  0  0  0  0  0  0
  188.5927  207.8949  251.6016 C   0  0  0  0  0  0  0  0  0  0  0  0
  189.8454  205.4692  248.9248 C   0  0  0  0  0  0  0  0  0  0  0  0
  189.2764  204.4216  248.1761 C   0  0  0  0  0  0  0  0  0  0  0  0
  189.9256  203.8919  247.0534 C   0  0  0  0  0  0  0  0  0  0  0  0
  191.1174  204.4225  246.5957 C   0  0  0  0  0  0  0  0  0  0  0  0
  191.6831  205.4902  247.2820 C   0  0  0  0  0  0  0  0  0  0  0  0
  191.0626  205.9922  248.4357 C   0  0  0  0  0  0  0  0  0  0  0  0
  189.3702  202.8369  246.3846 O   0  0  0  0  0  0  0  0  0  0  0  0
  188.0500  203.8654  248.4511 O   0  0  0  0  0  0  0  0  0  0  0  0
  188.5371  202.6595  246.8642 H   0  0  0  0  0  0  0  0  0  0  0  0
  187.5736  204.5020  249.0137 H   0  0  0  0  0  0  0  0  0  0  0  0
  1  6  1  0  0  0  0
  1  2  2  0  0  0  0
  2  3  1  0  0  0  0
  3  4  2  0  0  0  0
  4  5  1  0  0  0  0
  4  7  1  0  0  0  0
  5  6  2  0  0  0  0
  7 12  1  0  0  0  0
  7  8  2  0  0  0  0
  8  9  1  0  0  0  0
  8 14  1  0  0  0  0
  9 10  2  0  0  0  0
  9 13  1  0  0  0  0
 10 11  1  0  0  0  0
 11 12  2  0  0  0  0
 13 15  1  0  0  0  0
 14 16  1  0  0  0  0
M  END
>  <CHROM.1>
43.30090345,18.44312643,1.25553610,189.40856244,205.31883428,249.19801138
1.94952565,0.67719065,0.80757411

>  <Name>


>  <RI>
0

>  <Rbt.Current_Directory>
/data/dnb03/galaxy_db/job_working_directory/014/442/14442301/working

>  <Rbt.Executable>
rbdock ($Id: //depot/dev/client3/rdock/2013.1/src/exe/rbdock.cxx#4 $)

>  <Rbt.Library>
libRbt.so (2013.1, Build901 2013/11/27)

>  <Rbt.Parameter_File>
/usr/local/tools/_conda/envs/__rdock@2013.1-0/share/rdock-2013.1-1/data/scripts/dock.prm

>  <Rbt.Receptor>
receptor.prm

>  <SCORE>
6.35016

>  <SCORE.INTER>
6.4

>  <SCORE.INTER.CONST>
1

>  <SCORE.INTER.POLAR>
0

>  <SCORE.INTER.REPUL>
0

>  <SCORE.INTER.ROT>
1

>  <SCORE.INTER.VDW>
0

>  <SCORE.INTER.norm>
0.457143

>  <SCORE.INTRA>
-0.0498378

>  <SCORE.INTRA.DIHEDRAL>
0.340968

>  <SCORE.INTRA.DIHEDRAL.0>
2.59286

>  <SCORE.INTRA.POLAR>
-0.0079472

>  <SCORE.INTRA.POLAR.0>
-0.359379

>  <SCORE.INTRA.REPUL>
0

>  <SCORE.INTRA.REPUL.0>
0

>  <SCORE.INTRA.VDW>
-0.193301

>  <SCORE.INTRA.VDW.0>
-0.0519497

>  <SCORE.INTRA.norm>
-0.00355984

>  <SCORE.RESTR>


>  <SCORE.RESTR.norm>
0

>  <SCORE.SYSTEM>
0

>  <SCORE.SYSTEM.CONST>
0

>  <SCORE.SYSTEM.DIHEDRAL>
0

>  <SCORE.SYSTEM.norm>
0

>  <SCORE.heavy>
14

>  <SCORE.norm>
0.453583

>  <TransFSReceptor>
receptor

>  <TransFSScore>
0.027265

$$$$

 OpenBabel01192115203D
libRbt.so/2013.1/901 2013/11/27
 27 29  0  0  0  0  0  0  0  0999 V2000
  202.4848  204.8575  253.0862 C   0  0  0  0  0  0  0  0  0  0  0  0
  203.4579  204.2071  254.0657 C   0  0  0  0  0  0  0  0  0  0  0  0
  204.3382  203.1038  253.4731 C   0  0  0  0  0  0  0  0  0  0  0  0
  205.1521  203.5230  252.2485 C   0  0  0  0  0  0  0  0  0  0  0  0
  204.3235  203.6212  251.0436 N   0  0  0  0  0  0  0  0  0  0  0  0
  203.6108  204.8775  250.8138 C   0  0  0  0  0  0  0  0  0  0  0  0
  203.2089  205.6921  252.0371 C   0  0  0  0  0  0  0  0  0  0  0  0
  204.2895  202.4926  250.1897 C   0  0  0  0  0  0  0  0  0  0  0  0
  204.8783  201.4541  250.4809 O   0  0  0  0  0  0  0  0  0  0  0  0
  203.5591  202.5265  248.8784 C   0  0  0  0  0  0  0  0  0  0  0  0
  203.5545  203.6873  248.0872 C   0  0  0  0  0  0  0  0  0  0  0  0
  202.8457  203.7532  246.8872 C   0  0  0  0  0  0  0  0  0  0  0  0
  202.2771  202.6018  246.3608 C   0  0  0  0  0  0  0  0  0  0  0  0
  202.4029  201.3961  247.0496 C   0  0  0  0  0  0  0  0  0  0  0  0
  202.9566  201.3712  248.3465 C   0  0  0  0  0  0  0  0  0  0  0  0
  202.8499  200.1542  249.0547 N   0  0  0  0  0  0  0  0  0  0  0  0
  202.5852  199.9894  250.4079 C   0  0  0  0  0  0  0  0  0  0  0  0
  203.0392  198.9936  250.9706 O   0  0  0  0  0  0  0  0  0  0  0  0
  201.7441  200.9504  251.1867 C   0  0  0  0  0  0  0  0  0  0  0  0
  201.6555  200.9038  252.5891 C   0  0  0  0  0  0  0  0  0  0  0  0
  200.8230  201.8020  253.2802 C   0  0  0  0  0  0  0  0  0  0  0  0
  200.0933  202.7616  252.5852 C   0  0  0  0  0  0  0  0  0  0  0  0
  200.1368  202.7950  251.2010 C   0  0  0  0  0  0  0  0  0  0  0  0
  200.9228  201.8678  250.5171 C   0  0  0  0  0  0  0  0  0  0  0  0
  199.1088  203.8885  253.4303 Cl  0  0  0  0  0  0  0  0  0  0  0  0
  202.5305  199.7752  253.5651 Cl  0  0  0  0  0  0  0  0  0  0  0  0
  202.5027  199.3603  248.5244 H   0  0  0  0  0  0  0  0  0  0  0  0
  1  7  1  0  0  0  0
  1  2  1  0  0  0  0
  2  3  1  0  0  0  0
  3  4  1  0  0  0  0
  4  5  1  0  0  0  0
  5  6  1  0  0  0  0
  5  8  1  0  0  0  0
  6  7  1  0  0  0  0
  8  9  2  0  0  0  0
  8 10  1  0  0  0  0
 10 15  1  0  0  0  0
 10 11  2  0  0  0  0
 11 12  1  0  0  0  0
 12 13  2  0  0  0  0
 13 14  1  0  0  0  0
 14 15  2  0  0  0  0
 15 16  1  0  0  0  0
 16 17  1  0  0  0  0
 16 27  1  0  0  0  0
 17 18  2  0  0  0  0
 17 19  1  0  0  0  0
 19 24  1  0  0  0  0
 19 20  2  0  0  0  0
 20 21  1  0  0  0  0
 20 26  1  0  0  0  0
 21 22  2  0  0  0  0
 22 23  1  0  0  0  0
 22 25  1  0  0  0  0
 23 24  2  0  0  0  0
M  END
>  <CHROM.1>
37.02457094,38.17799580,-150.92422522,-169.45564199,202.48270079,202.35830623
251.16480447,-2.78294334,-1.20500995,-2.92503317

>  <Name>


>  <RI>
0

>  <Rbt.Current_Directory>
/data/dnb03/galaxy_db/job_working_directory/014/442/14442302/working

>  <Rbt.Executable>
rbdock ($Id: //depot/dev/client3/rdock/2013.1/src/exe/rbdock.cxx#4 $)

>  <Rbt.Library>
libRbt.so (2013.1, Build901 2013/11/27)

>  <Rbt.Parameter_File>
/usr/local/tools/_conda/envs/__rdock@2013.1-0/share/rdock-2013.1-1/data/scripts/dock.prm

>  <Rbt.Receptor>
receptor.prm

>  <SCORE>
4.33627

>  <SCORE.INTER>
9.4

>  <SCORE.INTER.CONST>
1

>  <SCORE.INTER.POLAR>
0

>  <SCORE.INTER.REPUL>
0

>  <SCORE.INTER.ROT>
4

>  <SCORE.INTER.VDW>
0

>  <SCORE.INTER.norm>
0.361538

>  <SCORE.INTRA>
-5.06373

>  <SCORE.INTRA.DIHEDRAL>
-5.57663

>  <SCORE.INTRA.DIHEDRAL.0>
11.5385

>  <SCORE.INTRA.POLAR>
0

>  <SCORE.INTRA.POLAR.0>
0

>  <SCORE.INTRA.REPUL>
0

>  <SCORE.INTRA.REPUL.0>
0

>  <SCORE.INTRA.VDW>
-2.27541

>  <SCORE.INTRA.VDW.0>
-3.15259

>  <SCORE.INTRA.norm>
-0.194759

>  <SCORE.RESTR>


>  <SCORE.RESTR.norm>
0

>  <SCORE.SYSTEM>
0

>  <SCORE.SYSTEM.CONST>
0

>  <SCORE.SYSTEM.DIHEDRAL>
0

>  <SCORE.SYSTEM.norm>
0

>  <SCORE.heavy>
26

>  <SCORE.norm>
0.16678

>  <TransFSReceptor>
receptor

>  <TransFSScore>
0.000473

$$$$

 OpenBabel01192115203D
libRbt.so/2013.1/901 2013/11/27
 29 30  0  0  0  0  0  0  0  0999 V2000
  193.8888  203.6309  252.0588 C   0  0  0  0  0  0  0  0  0  0  0  0
  195.5092  203.8478  251.9071 C   0  0  0  0  0  0  0  0  0  0  0  0
  195.9224  202.3488  252.1793 C   0  0  0  0  0  0  0  0  0  0  0  0
  195.2447  203.5267  250.2354 C   0  0  0  0  0  0  0  0  0  0  0  0
  196.5153  205.4402  252.8152 C   0  0  0  0  0  0  0  0  0  0  0  0
  196.0693  206.7383  253.5535 C   0  0  0  0  0  0  0  0  0  0  0  0
  196.8391  207.2590  254.5980 C   0  5  0  0  0  0  0  0  0  0  0  0
  198.0023  206.4137  254.5050 C   0  0  0  0  0  0  0  0  0  0  0  0
  197.8852  205.4699  253.3596 C   0  0  0  0  0  0  0  0  0  0  0  0
  199.2718  206.4504  255.9511 Si  0  0  0  0  0  0  0  0  0  0  0  0
  199.5034  207.9799  257.1204 C   0  0  0  0  0  0  0  0  0  0  0  0
  198.4110  205.2481  256.9895 C   0  0  0  0  0  0  0  0  0  0  0  0
  201.0142  205.8527  255.5200 C   0  0  0  0  0  0  0  0  0  0  0  0
  196.0892  208.6475  256.0401 Si  0  0  0  0  0  0  0  0  0  0  0  0
  194.3141  209.5037  256.0997 C   0  0  0  0  0  0  0  0  0  0  0  0
  195.6998  207.7675  257.6374 C   0  0  0  0  0  0  0  0  0  0  0  0
  197.1069  210.1560  256.6237 C   0  5  0  0  0  0  0  0  0  0  0  0
  197.0869  210.6637  257.9279 C   0  0  0  0  0  0  0  0  0  0  0  0
  197.9939  211.7145  258.0157 C   0  0  0  0  0  0  0  0  0  0  0  0
  198.5239  211.9011  256.7548 C   0  0  0  0  0  0  0  0  0  0  0  0
  197.9649  210.9875  255.8937 C   0  0  0  0  0  0  0  0  0  0  0  0
  198.4062  210.9750  254.0943 Si  0  0  0  0  0  0  0  0  0  0  0  0
  199.5187  209.5609  253.6672 C   0  0  0  0  0  0  0  0  0  0  0  0
  196.8560  210.5999  253.1767 C   0  0  0  0  0  0  0  0  0  0  0  0
  199.3989  212.4806  253.5531 C   0  0  0  0  0  0  0  0  0  0  0  0
  198.3758  212.5000  259.2749 C   0  0  0  0  0  0  0  0  0  0  0  0
  199.6522  211.8804  259.8756 C   0  0  0  0  0  0  0  0  0  0  0  0
  198.6686  213.9829  258.9380 C   0  0  0  0  0  0  0  0  0  0  0  0
  197.2416  212.4522  260.3160 C   0  0  0  0  0  0  0  0  0  0  0  0
  1  2  1  0  0  0  0
  2  3  1  0  0  0  0
  2  4  1  0  0  0  0
  2  5  1  0  0  0  0
  5  9  1  0  0  0  0
  5  6  2  0  0  0  0
  6  7  1  0  0  0  0
  7  8  1  0  0  0  0
  7 14  1  0  0  0  0
  8  9  2  0  0  0  0
  8 10  1  0  0  0  0
 10 11  1  0  0  0  0
 10 12  1  0  0  0  0
 10 13  1  0  0  0  0
 14 15  1  0  0  0  0
 14 16  1  0  0  0  0
 14 17  1  0  0  0  0
 17 21  1  0  0  0  0
 17 18  1  0  0  0  0
 18 19  2  0  0  0  0
 19 20  1  0  0  0  0
 19 26  1  0  0  0  0
 20 21  2  0  0  0  0
 21 22  1  0  0  0  0
 22 23  1  0  0  0  0
 22 24  1  0  0  0  0
 22 25  1  0  0  0  0
 26 27  1  0  0  0  0
 26 28  1  0  0  0  0
 26 29  1  0  0  0  0
M  CHG  2   7  -1  17  -1
M  END
>  <CHROM.1>
-10.02983387,-4.34236269,-25.86550895,-144.49196314,95.15768481,-72.98440360
197.53303273,208.49352897,255.46435002,2.21278892,1.18423950,-3.13173379

>  <Name>


>  <RI>
0

>  <Rbt.Current_Directory>
/data/dnb03/galaxy_db/job_working_directory/014/442/14442303/working

>  <Rbt.Executable>
rbdock ($Id: //depot/dev/client3/rdock/2013.1/src/exe/rbdock.cxx#4 $)

>  <Rbt.Library>
libRbt.so (2013.1, Build901 2013/11/27)

>  <Rbt.Parameter_File>
/usr/local/tools/_conda/envs/__rdock@2013.1-0/share/rdock-2013.1-1/data/scripts/dock.prm

>  <Rbt.Receptor>
receptor.prm

>  <SCORE>
8.40931

>  <SCORE.INTER>
11.4

>  <SCORE.INTER.CONST>
1

>  <SCORE.INTER.POLAR>
0

>  <SCORE.INTER.REPUL>
0

>  <SCORE.INTER.ROT>
6

>  <SCORE.INTER.VDW>
0

>  <SCORE.INTER.norm>
0.393103

>  <SCORE.INTRA>
-2.99069

>  <SCORE.INTRA.DIHEDRAL>
-0.924974

>  <SCORE.INTRA.DIHEDRAL.0>
6.30842

>  <SCORE.INTRA.POLAR>
0

>  <SCORE.INTRA.POLAR.0>
0

>  <SCORE.INTRA.REPUL>
0

>  <SCORE.INTRA.REPUL.0>
0

>  <SCORE.INTRA.VDW>
-2.52821

>  <SCORE.INTRA.VDW.0>
-0.986394

>  <SCORE.INTRA.norm>
-0.103127

>  <SCORE.RESTR>


>  <SCORE.RESTR.norm>
0

>  <SCORE.SYSTEM>
0

>  <SCORE.SYSTEM.CONST>
0

>  <SCORE.SYSTEM.DIHEDRAL>
0

>  <SCORE.SYSTEM.norm>
0

>  <SCORE.heavy>
29

>  <SCORE.norm>
0.289976

>  <TransFSReceptor>
receptor

>  <TransFSScore>
0.000493

$$$$

 OpenBabel01192115203D
libRbt.so/2013.1/901 2013/11/27
 22 24  0  0  0  0  0  0  0  0999 V2000
  216.5621  182.5105  240.1717 C   0  0  0  0  0  0  0  0  0  0  0  0
  217.7020  181.8169  240.6733 O   0  0  0  0  0  0  0  0  0  0  0  0
  218.4834  182.4846  241.5736 C   0  0  0  0  0  0  0  0  0  0  0  0
  219.0475  181.7107  242.5851 C   0  0  0  0  0  0  0  0  0  0  0  0
  219.9105  182.2773  243.5413 C   0  0  0  0  0  0  0  0  0  0  0  0
  220.2754  183.6354  243.4852 C   0  0  0  0  0  0  0  0  0  0  0  0
  219.6715  184.3893  242.4674 C   0  0  0  0  0  0  0  0  0  0  0  0
  218.7879  183.8351  241.5321 C   0  0  0  0  0  0  0  0  0  0  0  0
  221.3452  184.1934  244.4655 C   0  0  1  0  0  0  0  0  0  0  0  0
  222.5048  184.9030  243.6896 C   0  0  1  0  0  0  0  0  0  0  0  0
  223.6323  185.5361  244.5409 C   0  0  0  0  0  0  0  0  0  0  0  0
  224.6497  184.5600  245.1348 C   0  0  0  0  0  0  0  0  0  0  0  0
  225.2175  183.5938  244.1026 C   0  0  0  0  0  0  0  0  0  0  0  0
  224.1153  182.9058  243.3165 C   0  0  0  0  0  0  0  0  0  0  0  0
  223.1982  183.9492  242.7217 C   0  0  0  0  0  0  0  0  0  0  0  0
  223.0356  184.0394  241.5072 O   0  0  0  0  0  0  0  0  0  0  0  0
  220.8240  184.9948  245.6202 N   0  0  0  0  0  0  0  0  0  0  0  0
  220.0764  186.2185  245.2978 C   0  0  0  0  0  0  0  0  0  0  0  0
  219.4677  186.9549  246.4921 C   0  0  0  0  0  0  0  0  0  0  0  0
  218.7344  186.0018  247.4184 C   0  0  0  0  0  0  0  0  0  0  0  0
  219.7116  184.9357  247.8734 C   0  0  0  0  0  0  0  0  0  0  0  0
  220.2458  184.1495  246.6709 C   0  0  0  0  0  0  0  0  0  0  0  0
  1  2  1  0  0  0  0
  2  3  1  0  0  0  0
  3  8  1  0  0  0  0
  3  4  2  0  0  0  0
  4  5  1  0  0  0  0
  5  6  2  0  0  0  0
  6  7  1  0  0  0  0
  7  8  2  0  0  0  0
  9  6  1  6  0  0  0
  9 17  1  0  0  0  0
 10  9  1  1  0  0  0
 10 15  1  0  0  0  0
 10 11  1  0  0  0  0
 11 12  1  0  0  0  0
 12 13  1  0  0  0  0
 13 14  1  0  0  0  0
 14 15  1  0  0  0  0
 15 16  2  0  0  0  0
 17 22  1  0  0  0  0
 17 18  1  0  0  0  0
 18 19  1  0  0  0  0
 19 20  1  0  0  0  0
 20 21  1  0  0  0  0
 21 22  1  0  0  0  0
M  END
>  <CHROM.1>
144.36064011,125.51121886,178.75001679,-61.03376283,220.77628168,184.07708458
243.85121413,2.30208447,-0.02576777,-2.07658482

>  <Name>


>  <RI>
0

>  <Rbt.Current_Directory>
/data/dnb03/galaxy_db/job_working_directory/014/442/14442304/working

>  <Rbt.Executable>
rbdock ($Id: //depot/dev/client3/rdock/2013.1/src/exe/rbdock.cxx#4 $)

>  <Rbt.Library>
libRbt.so (2013.1, Build901 2013/11/27)

>  <Rbt.Parameter_File>
/usr/local/tools/_conda/envs/__rdock@2013.1-0/share/rdock-2013.1-1/data/scripts/dock.prm

>  <Rbt.Receptor>
receptor.prm

>  <SCORE>
8.70728

>  <SCORE.INTER>
9.4

>  <SCORE.INTER.CONST>
1

>  <SCORE.INTER.POLAR>
0

>  <SCORE.INTER.REPUL>
0

>  <SCORE.INTER.ROT>
4

>  <SCORE.INTER.VDW>
0

>  <SCORE.INTER.norm>
0.427273

>  <SCORE.INTRA>
-0.692721

>  <SCORE.INTRA.DIHEDRAL>
1.26863

>  <SCORE.INTRA.DIHEDRAL.0>
1.83071

>  <SCORE.INTRA.POLAR>
0

>  <SCORE.INTRA.POLAR.0>
0

>  <SCORE.INTRA.REPUL>
0

>  <SCORE.INTRA.REPUL.0>
0

>  <SCORE.INTRA.VDW>
-1.32704

>  <SCORE.INTRA.VDW.0>
-0.465622

>  <SCORE.INTRA.norm>
-0.0314873

>  <SCORE.RESTR>


>  <SCORE.RESTR.norm>
0

>  <SCORE.SYSTEM>
0

>  <SCORE.SYSTEM.CONST>
0

>  <SCORE.SYSTEM.DIHEDRAL>
0

>  <SCORE.SYSTEM.norm>
0

>  <SCORE.heavy>
22

>  <SCORE.norm>
0.395785

>  <TransFSReceptor>
receptor

>  <TransFSScore>
0.000215

$$$$

 OpenBabel01192115203D
libRbt.so/2013.1/901 2013/11/27
 31 33  0  0  0  0  0  0  0  0999 V2000
  201.4296  203.5076  248.4980 C   0  0  0  0  0  0  0  0  0  0  0  0
  202.0996  202.5672  249.4936 C   0  0  1  0  0  0  0  0  0  0  0  0
  203.3386  201.9198  248.8887 C   0  0  0  0  0  0  0  0  0  0  0  0
  203.2610  200.5681  248.4935 C   0  0  0  0  0  0  0  0  0  0  0  0
  204.3459  199.9273  247.8959 C   0  0  0  0  0  0  0  0  0  0  0  0
  205.5173  200.6367  247.6806 C   0  0  0  0  0  0  0  0  0  0  0  0
  205.6205  201.9736  248.0482 C   0  0  0  0  0  0  0  0  0  0  0  0
  204.5323  202.6152  248.6531 C   0  0  0  0  0  0  0  0  0  0  0  0
  206.5607  200.0224  247.1069 F   0  0  0  0  0  0  0  0  0  0  0  0
  202.3833  203.2453  250.7670 N   0  0  0  0  0  0  0  0  0  0  0  0
  203.2580  202.7076  251.7234 C   0  0  0  0  0  0  0  0  0  0  0  0
  204.6364  203.0113  251.7910 C   0  0  0  0  0  0  0  0  0  0  0  0
  205.5234  202.2448  252.5958 C   0  0  0  0  0  0  0  0  0  0  0  0
  205.0232  201.1955  253.3683 C   0  0  0  0  0  0  0  0  0  0  0  0
  203.6509  200.9950  253.4404 C   0  0  0  0  0  0  0  0  0  0  0  0
  202.7918  201.7427  252.6306 C   0  0  0  0  0  0  0  0  0  0  0  0
  206.0932  200.1480  254.3374 S   0  0  0  0  0  0  0  0  0  0  0  0
  207.4231  200.7077  254.3375 O   0  0  0  0  0  0  0  0  0  0  0  0
  205.4127  199.8161  255.5719 O   0  0  0  0  0  0  0  0  0  0  0  0
  206.1422  198.7258  253.4051 N   0  0  0  0  0  0  0  0  0  0  0  0
  206.3706  198.8489  251.9441 C   0  0  0  0  0  0  0  0  0  0  0  0
  205.0522  199.1355  251.2012 C   0  0  0  0  0  0  0  0  0  0  0  0
  203.9683  198.1113  251.5515 N   0  3  1  0  0  0  0  0  0  0  0  0
  204.2382  197.2274  251.0996 H   0  0  0  0  0  0  0  0  0  0  0  0
  203.8329  197.8319  253.0556 C   0  0  0  0  0  0  0  0  0  0  0  0
  205.1968  197.6357  253.7495 C   0  0  0  0  0  0  0  0  0  0  0  0
  202.6363  198.5178  250.9622 C   0  0  0  0  0  0  0  0  0  0  0  0
  205.2075  204.1475  251.0465 N   0  3  0  0  0  0  0  0  0  0  0  0
  204.4486  205.0501  250.6663 O   0  0  0  0  0  0  0  0  0  0  0  0
  206.4405  204.1645  250.8967 O   0  5  0  0  0  0  0  0  0  0  0  0
  201.6068  203.7750  251.1701 H   0  0  0  0  0  0  0  0  0  0  0  0
  2  1  1  6  0  0  0
  2  3  1  0  0  0  0
  2 10  1  0  0  0  0
  3  8  1  0  0  0  0
  3  4  2  0  0  0  0
  4  5  1  0  0  0  0
  5  6  2  0  0  0  0
  6  7  1  0  0  0  0
  6  9  1  0  0  0  0
  7  8  2  0  0  0  0
 10 11  1  0  0  0  0
 10 31  1  0  0  0  0
 11 16  1  0  0  0  0
 11 12  2  0  0  0  0
 12 13  1  0  0  0  0
 12 28  1  0  0  0  0
 13 14  2  0  0  0  0
 14 15  1  0  0  0  0
 14 17  1  0  0  0  0
 15 16  2  0  0  0  0
 17 18  2  0  0  0  0
 17 19  2  0  0  0  0
 17 20  1  0  0  0  0
 20 26  1  0  0  0  0
 20 21  1  0  0  0  0
 21 22  1  0  0  0  0
 22 23  1  0  0  0  0
 23 24  1  6  0  0  0
 23 25  1  0  0  0  0
 23 27  1  0  0  0  0
 25 26  1  0  0  0  0
 28 29  2  0  0  0  0
 28 30  1  0  0  0  0
M  CHG  3  23   1  28   1  30  -1
M  END
>  <CHROM.1>
-105.05233399,-164.97798707,92.50652271,9.12804697,46.59340019,204.66908337
201.03447047,251.30813412,3.07695013,1.30278270,-2.51660135

>  <Name>


>  <RI>
0

>  <Rbt.Current_Directory>
/data/dnb03/galaxy_db/job_working_directory/014/442/14442305/working

>  <Rbt.Executable>
rbdock ($Id: //depot/dev/client3/rdock/2013.1/src/exe/rbdock.cxx#4 $)

>  <Rbt.Library>
libRbt.so (2013.1, Build901 2013/11/27)

>  <Rbt.Parameter_File>
/usr/local/tools/_conda/envs/__rdock@2013.1-0/share/rdock-2013.1-1/data/scripts/dock.prm

>  <Rbt.Receptor>
receptor.prm

>  <SCORE>
4.67678

>  <SCORE.INTER>
10.4

>  <SCORE.INTER.CONST>
1

>  <SCORE.INTER.POLAR>
0

>  <SCORE.INTER.REPUL>
0

>  <SCORE.INTER.ROT>
5

>  <SCORE.INTER.VDW>
0

>  <SCORE.INTER.norm>
0.358621

>  <SCORE.INTRA>
-5.72322

>  <SCORE.INTRA.DIHEDRAL>
-2.65355

>  <SCORE.INTRA.DIHEDRAL.0>
6.4137

>  <SCORE.INTRA.POLAR>
0

>  <SCORE.INTRA.POLAR.0>
0

>  <SCORE.INTRA.REPUL>
0

>  <SCORE.INTRA.REPUL.0>
0

>  <SCORE.INTRA.VDW>
-4.39644

>  <SCORE.INTRA.VDW.0>
-1.61448

>  <SCORE.INTRA.norm>
-0.197352

>  <SCORE.RESTR>


>  <SCORE.RESTR.norm>
0

>  <SCORE.SYSTEM>
0

>  <SCORE.SYSTEM.CONST>
0

>  <SCORE.SYSTEM.DIHEDRAL>
0

>  <SCORE.SYSTEM.norm>
0

>  <SCORE.heavy>
29

>  <SCORE.norm>
0.161268

>  <TransFSReceptor>
receptor

>  <TransFSScore>
0.000015

$$$$

 OpenBabel01192115203D
libRbt.so/2013.1/901 2013/11/27
 14 14  0  0  0  0  0  0  0  0999 V2000
  209.4635  207.5935  245.5416 C   0  0  0  0  0  0  0  0  0  0  0  0
  208.0654  207.6153  245.2857 O   0  0  0  0  0  0  0  0  0  0  0  0
  207.3177  207.4279  246.4295 C   0  0  0  0  0  0  0  0  0  0  0  0
  206.3864  208.3480  246.6358 N   0  0  0  0  0  0  0  0  0  0  0  0
  205.6673  208.1549  247.7247 C   0  0  0  0  0  0  0  0  0  0  0  0
  205.8316  207.1572  248.5803 N   0  0  0  0  0  0  0  0  0  0  0  0
  206.7666  206.2806  248.2512 C   0  0  0  0  0  0  0  0  0  0  0  0
  207.5612  206.3740  247.2013 N   0  0  0  0  0  0  0  0  0  0  0  0
  206.9602  205.2064  249.0960 N   0  0  0  0  0  0  0  0  0  0  0  0
  204.7031  209.0975  248.0223 N   0  0  0  0  0  0  0  0  0  0  0  0
  206.6543  205.4244  250.0334 H   0  0  0  0  0  0  0  0  0  0  0  0
  207.8830  204.8139  248.9797 H   0  0  0  0  0  0  0  0  0  0  0  0
  204.9213  209.9777  247.5761 H   0  0  0  0  0  0  0  0  0  0  0  0
  204.5073  209.1100  249.0129 H   0  0  0  0  0  0  0  0  0  0  0  0
  1  2  1  0  0  0  0
  2  3  1  0  0  0  0
  3  8  1  0  0  0  0
  3  4  2  0  0  0  0
  4  5  1  0  0  0  0
  5  6  2  0  0  0  0
  5 10  1  0  0  0  0
  6  7  1  0  0  0  0
  7  8  2  0  0  0  0
  7  9  1  0  0  0  0
  9 11  1  0  0  0  0
  9 12  1  0  0  0  0
 10 13  1  0  0  0  0
 10 14  1  0  0  0  0
M  END
>  <CHROM.1>
127.78608345,-22.50020037,-24.52171477,206.89508570,207.33334232,247.27434124
-0.46389182,-0.61983027,2.41583796

>  <Name>


>  <RI>
0

>  <Rbt.Current_Directory>
/data/dnb03/galaxy_db/job_working_directory/014/442/14442306/working

>  <Rbt.Executable>
rbdock ($Id: //depot/dev/client3/rdock/2013.1/src/exe/rbdock.cxx#4 $)

>  <Rbt.Library>
libRbt.so (2013.1, Build901 2013/11/27)

>  <Rbt.Parameter_File>
/usr/local/tools/_conda/envs/__rdock@2013.1-0/share/rdock-2013.1-1/data/scripts/dock.prm

>  <Rbt.Receptor>
receptor.prm

>  <SCORE>
7.96622

>  <SCORE.INTER>
8.4

>  <SCORE.INTER.CONST>
1

>  <SCORE.INTER.POLAR>
0

>  <SCORE.INTER.REPUL>
0

>  <SCORE.INTER.ROT>
3

>  <SCORE.INTER.VDW>
0

>  <SCORE.INTER.norm>
0.84

>  <SCORE.INTRA>
-0.433777

>  <SCORE.INTRA.DIHEDRAL>
2.23044

>  <SCORE.INTRA.DIHEDRAL.0>
1.70625

>  <SCORE.INTRA.POLAR>
0

>  <SCORE.INTRA.POLAR.0>
0

>  <SCORE.INTRA.REPUL>
0

>  <SCORE.INTRA.REPUL.0>
0

>  <SCORE.INTRA.VDW>
-1.54899

>  <SCORE.INTRA.VDW.0>
1.95974

>  <SCORE.INTRA.norm>
-0.0433777

>  <SCORE.RESTR>


>  <SCORE.RESTR.norm>
0

>  <SCORE.SYSTEM>
0

>  <SCORE.SYSTEM.CONST>
0

>  <SCORE.SYSTEM.DIHEDRAL>
0

>  <SCORE.SYSTEM.norm>
0

>  <SCORE.heavy>
10

>  <SCORE.norm>
0.796622

>  <TransFSReceptor>
receptor

>  <TransFSScore>
0.000241

$$$$

 OpenBabel01192115203D
libRbt.so/2013.1/901 2013/11/27
 22 23  0  0  0  0  0  0  0  0999 V2000
  226.4043  185.9423  253.1629 C   0  0  0  0  0  0  0  0  0  0  0  0
  225.7436  185.1916  252.1477 O   0  0  0  0  0  0  0  0  0  0  0  0
  224.7843  185.8789  251.4537 C   0  0  0  0  0  0  0  0  0  0  0  0
  224.8835  185.8273  250.0639 C   0  0  0  0  0  0  0  0  0  0  0  0
  223.9508  186.4992  249.2672 C   0  0  0  0  0  0  0  0  0  0  0  0
  222.8812  187.2025  249.8394 C   0  0  0  0  0  0  0  0  0  0  0  0
  222.7953  187.2448  251.2365 C   0  0  0  0  0  0  0  0  0  0  0  0
  223.7346  186.5872  252.0351 C   0  0  0  0  0  0  0  0  0  0  0  0
  221.9748  187.8482  248.9754 N   0  0  0  0  0  0  0  0  0  0  0  0
  221.0542  188.4420  249.5818 N   0  0  0  0  0  0  0  0  0  0  0  0
  220.0457  188.9121  248.6994 C   0  0  0  0  0  0  0  0  0  0  0  0
  219.6854  188.1352  247.5733 C   0  0  0  0  0  0  0  0  0  0  0  0
  218.7849  188.6620  246.6322 C   0  0  0  0  0  0  0  0  0  0  0  0
  218.1232  189.8750  246.8506 C   0  0  0  0  0  0  0  0  0  0  0  0
  218.4910  190.6416  247.9534 C   0  0  0  0  0  0  0  0  0  0  0  0
  219.4341  190.1645  248.8671 C   0  0  0  0  0  0  0  0  0  0  0  0
  217.2962  190.4230  245.8626 N   0  0  0  0  0  0  0  0  0  0  0  0
  220.3806  186.9472  247.2516 N   0  0  0  0  0  0  0  0  0  0  0  0
  217.7097  190.4216  244.9343 H   0  0  0  0  0  0  0  0  0  0  0  0
  216.3540  190.0474  245.8635 H   0  0  0  0  0  0  0  0  0  0  0  0
  221.2567  186.8750  247.7678 H   0  0  0  0  0  0  0  0  0  0  0  0
  219.8131  186.1106  247.3153 H   0  0  0  0  0  0  0  0  0  0  0  0
  1  2  1  0  0  0  0
  2  3  1  0  0  0  0
  3  8  1  0  0  0  0
  3  4  2  0  0  0  0
  4  5  1  0  0  0  0
  5  6  2  0  0  0  0
  6  7  1  0  0  0  0
  6  9  1  0  0  0  0
  7  8  2  0  0  0  0
  9 10  2  0  0  0  0
 10 11  1  0  0  0  0
 11 16  1  0  0  0  0
 11 12  2  0  0  0  0
 12 13  1  0  0  0  0
 12 18  1  0  0  0  0
 13 14  2  0  0  0  0
 14 15  1  0  0  0  0
 14 17  1  0  0  0  0
 15 16  2  0  0  0  0
 17 19  1  0  0  0  0
 17 20  1  0  0  0  0
 18 21  1  0  0  0  0
 18 22  1  0  0  0  0
M  END
>  <CHROM.1>
128.92197009,179.69896304,36.71310222,-13.85080385,-46.56609976,221.71972532
187.76899943,249.30910597,0.20193088,-0.70969836,0.97078194

>  <Name>


>  <RI>
0

>  <Rbt.Current_Directory>
/data/dnb03/galaxy_db/job_working_directory/014/442/14442307/working

>  <Rbt.Executable>
rbdock ($Id: //depot/dev/client3/rdock/2013.1/src/exe/rbdock.cxx#4 $)

>  <Rbt.Library>
libRbt.so (2013.1, Build901 2013/11/27)

>  <Rbt.Parameter_File>
/usr/local/tools/_conda/envs/__rdock@2013.1-0/share/rdock-2013.1-1/data/scripts/dock.prm

>  <Rbt.Receptor>
receptor.prm

>  <SCORE>
7.30236

>  <SCORE.INTER>
10.4

>  <SCORE.INTER.CONST>
1

>  <SCORE.INTER.POLAR>
0

>  <SCORE.INTER.REPUL>
0

>  <SCORE.INTER.ROT>
5

>  <SCORE.INTER.VDW>
0

>  <SCORE.INTER.norm>
0.577778

>  <SCORE.INTRA>
-3.09764

>  <SCORE.INTRA.DIHEDRAL>
0.715695

>  <SCORE.INTRA.DIHEDRAL.0>
5.48579

>  <SCORE.INTRA.POLAR>
-0.645731

>  <SCORE.INTRA.POLAR.0>
-0.00881228

>  <SCORE.INTRA.REPUL>
0

>  <SCORE.INTRA.REPUL.0>
0

>  <SCORE.INTRA.VDW>
-1.26

>  <SCORE.INTRA.VDW.0>
2.26503

>  <SCORE.INTRA.norm>
-0.172091

>  <SCORE.RESTR>


>  <SCORE.RESTR.norm>
0

>  <SCORE.SYSTEM>
0

>  <SCORE.SYSTEM.CONST>
0

>  <SCORE.SYSTEM.DIHEDRAL>
0

>  <SCORE.SYSTEM.norm>
0

>  <SCORE.heavy>
18

>  <SCORE.norm>
0.405686

>  <TransFSReceptor>
receptor

>  <TransFSScore>
0.000100

$$$$

 OpenBabel01192115203D
libRbt.so/2013.1/901 2013/11/27
 12 12  0  0  0  0  0  0  0  0999 V2000
  206.6892  191.4683  244.5883 C   0  0  0  0  0  0  0  0  0  0  0  0
  205.6398  190.7195  244.6595 N   0  0  0  0  0  0  0  0  0  0  0  0
  205.5529  189.6699  243.7838 C   0  0  0  0  0  0  0  0  0  0  0  0
  204.6023  188.8958  243.7622 O   0  0  0  0  0  0  0  0  0  0  0  0
  206.5852  189.4848  242.8984 N   0  0  0  0  0  0  0  0  0  0  0  0
  207.7053  190.2589  242.8079 C   0  0  0  0  0  0  0  0  0  0  0  0
  207.8275  191.2980  243.6569 C   0  0  0  0  0  0  0  0  0  0  0  0
  209.3885  192.5948  243.7612 I   0  0  0  0  0  0  0  0  0  0  0  0
  208.6375  189.9169  241.8533 N   0  0  0  0  0  0  0  0  0  0  0  0
  206.4479  188.7227  242.2513 H   0  0  0  0  0  0  0  0  0  0  0  0
  209.5273  189.6246  242.2459 H   0  0  0  0  0  0  0  0  0  0  0  0
  208.7513  190.6234  241.1282 H   0  0  0  0  0  0  0  0  0  0  0  0
  1  7  1  0  0  0  0
  1  2  2  0  0  0  0
  2  3  1  0  0  0  0
  3  4  2  0  0  0  0
  3  5  1  0  0  0  0
  5  6  1  0  0  0  0
  5 10  1  0  0  0  0
  6  7  2  0  0  0  0
  6  9  1  0  0  0  0
  7  8  1  0  0  0  0
  9 11  1  0  0  0  0
  9 12  1  0  0  0  0
M  END
>  <CHROM.1>
-115.25892342,208.11208859,191.46046634,243.61955417,2.64486946,-0.47588079
-2.40692896

>  <Name>


>  <RI>
0

>  <Rbt.Current_Directory>
/data/dnb03/galaxy_db/job_working_directory/014/442/14442308/working

>  <Rbt.Executable>
rbdock ($Id: //depot/dev/client3/rdock/2013.1/src/exe/rbdock.cxx#4 $)

>  <Rbt.Library>
libRbt.so (2013.1, Build901 2013/11/27)

>  <Rbt.Parameter_File>
/usr/local/tools/_conda/envs/__rdock@2013.1-0/share/rdock-2013.1-1/data/scripts/dock.prm

>  <Rbt.Receptor>
receptor.prm

>  <SCORE>
6.08247

>  <SCORE.INTER>
6.4

>  <SCORE.INTER.CONST>
1

>  <SCORE.INTER.POLAR>
0

>  <SCORE.INTER.REPUL>
0

>  <SCORE.INTER.ROT>
1

>  <SCORE.INTER.VDW>
0

>  <SCORE.INTER.norm>
0.711111

>  <SCORE.INTRA>
-0.317527

>  <SCORE.INTRA.DIHEDRAL>
0.00289678

>  <SCORE.INTRA.DIHEDRAL.0>
0.477094

>  <SCORE.INTRA.POLAR>
0

>  <SCORE.INTRA.POLAR.0>
0

>  <SCORE.INTRA.REPUL>
0

>  <SCORE.INTRA.REPUL.0>
0

>  <SCORE.INTRA.VDW>
-0.318976

>  <SCORE.INTRA.VDW.0>
-0.296903

>  <SCORE.INTRA.norm>
-0.0352808

>  <SCORE.RESTR>


>  <SCORE.RESTR.norm>
0

>  <SCORE.SYSTEM>
0

>  <SCORE.SYSTEM.CONST>
0

>  <SCORE.SYSTEM.DIHEDRAL>
0

>  <SCORE.SYSTEM.norm>
0

>  <SCORE.heavy>
9

>  <SCORE.norm>
0.67583

>  <TransFSReceptor>
receptor

>  <TransFSScore>
0.000459

$$$$

 OpenBabel01192115203D
libRbt.so/2013.1/901 2013/11/27
 18 19  0  0  0  0  0  0  0  0999 V2000
  216.9495  175.1901  241.5582 C   0  0  0  0  0  0  0  0  0  0  0  0
  215.5069  175.6652  241.7776 C   0  0  1  0  0  0  0  0  0  0  0  0
  215.5571  176.9600  242.5723 C   0  0  0  0  0  0  0  0  0  0  0  0
  215.5988  178.0341  243.2314 N   0  0  0  0  0  0  0  0  0  0  0  0
  214.7514  175.8379  240.5247 N   0  0  0  0  0  0  0  0  0  0  0  0
  213.7034  174.9748  240.2344 C   0  0  0  0  0  0  0  0  0  0  0  0
  213.3617  174.0495  240.9686 O   0  0  0  0  0  0  0  0  0  0  0  0
  212.9875  175.2067  238.9644 C   0  0  0  0  0  0  0  0  0  0  0  0
  211.8519  174.4423  238.6571 C   0  0  0  0  0  0  0  0  0  0  0  0
  211.1857  174.6349  237.4446 C   0  0  0  0  0  0  0  0  0  0  0  0
  211.6667  175.5755  236.5392 C   0  0  0  0  0  0  0  0  0  0  0  0
  212.7979  176.3379  236.8492 C   0  0  0  0  0  0  0  0  0  0  0  0
  213.4519  176.1706  238.0750 C   0  0  0  0  0  0  0  0  0  0  0  0
  214.6320  176.9608  238.4890 C   0  0  0  0  0  0  0  0  0  0  0  0
  215.2069  176.7898  239.6486 N   0  0  0  0  0  0  0  0  0  0  0  0
  215.2840  178.0464  237.6096 C   0  0  0  0  0  0  0  0  0  0  0  0
  216.2853  178.6484  238.1087 O   0  0  0  0  0  0  0  0  0  0  0  0
  214.7511  178.2587  236.4759 O   0  0  0  0  0  0  0  0  0  0  0  0
  2  1  1  6  0  0  0
  2  3  1  0  0  0  0
  2  5  1  0  0  0  0
  3  4  3  0  0  0  0
  5 15  1  0  0  0  0
  5  6  1  0  0  0  0
  6  7  2  0  0  0  0
  6  8  1  0  0  0  0
  8 13  1  0  0  0  0
  8  9  2  0  0  0  0
  9 10  1  0  0  0  0
 10 11  2  0  0  0  0
 11 12  1  0  0  0  0
 12 13  2  0  0  0  0
 13 14  1  0  0  0  0
 14 15  2  0  0  0  0
 14 16  1  0  0  0  0
 16 17  2  0  0  0  0
 16 18  1  0  0  0  0
M  END
>  <CHROM.1>
111.43445552,179.37303883,214.25156410,176.23420623,239.32942270,0.72095464
0.72260868,2.07925717

>  <Name>


>  <RI>
0

>  <Rbt.Current_Directory>
/data/dnb03/galaxy_db/job_working_directory/014/442/14442309/working

>  <Rbt.Executable>
rbdock ($Id: //depot/dev/client3/rdock/2013.1/src/exe/rbdock.cxx#4 $)

>  <Rbt.Library>
libRbt.so (2013.1, Build901 2013/11/27)

>  <Rbt.Parameter_File>
/usr/local/tools/_conda/envs/__rdock@2013.1-0/share/rdock-2013.1-1/data/scripts/dock.prm

>  <Rbt.Receptor>
receptor.prm

>  <SCORE>
4.43967

>  <SCORE.INTER>
7.4

>  <SCORE.INTER.CONST>
1

>  <SCORE.INTER.POLAR>
0

>  <SCORE.INTER.REPUL>
0

>  <SCORE.INTER.ROT>
2

>  <SCORE.INTER.VDW>
0

>  <SCORE.INTER.norm>
0.411111

>  <SCORE.INTRA>
-2.96033

>  <SCORE.INTRA.DIHEDRAL>
-4.2732

>  <SCORE.INTRA.DIHEDRAL.0>
6.77626

>  <SCORE.INTRA.POLAR>
0

>  <SCORE.INTRA.POLAR.0>
0

>  <SCORE.INTRA.REPUL>
0

>  <SCORE.INTRA.REPUL.0>
0

>  <SCORE.INTRA.VDW>
-0.823733

>  <SCORE.INTRA.VDW.0>
0.244643

>  <SCORE.INTRA.norm>
-0.164463

>  <SCORE.RESTR>


>  <SCORE.RESTR.norm>
0

>  <SCORE.SYSTEM>
0

>  <SCORE.SYSTEM.CONST>
0

>  <SCORE.SYSTEM.DIHEDRAL>
0

>  <SCORE.SYSTEM.norm>
0

>  <SCORE.heavy>
18

>  <SCORE.norm>
0.246648

>  <TransFSReceptor>
receptor

>  <TransFSScore>
0.012429

$$$$

 OpenBabel01192115203D
libRbt.so/2013.1/901 2013/11/27
 21 23  0  0  0  0  0  0  0  0999 V2000
  211.1828  185.2370  242.0219 C   0  0  0  0  0  0  0  0  0  0  0  0
  212.0799  186.2289  242.8141 C   0  0  0  0  0  0  0  0  0  0  0  0
  211.3705  187.5550  243.1643 C   0  0  1  0  0  0  0  0  0  0  0  0
  210.2121  187.0998  244.0840 C   0  0  0  0  0  0  0  0  0  0  0  0
  210.8067  185.8899  244.8333 C   0  0  0  0  0  0  0  0  0  0  0  0
  212.2892  185.8981  244.3495 C   0  0  2  0  0  0  0  0  0  0  0  0
  212.9891  187.1883  244.9706 C   0  0  1  0  0  0  0  0  0  0  0  0
  212.3912  188.3035  244.0577 C   0  0  0  0  0  0  0  0  0  0  0  0
  212.7445  187.5397  246.4859 C   0  0  0  0  0  0  0  0  0  0  0  0
  213.1870  186.4519  247.4509 C   0  0  0  0  0  0  0  0  0  0  0  0
  213.5665  185.5188  248.2787 C   0  0  0  0  0  0  0  0  0  0  0  0
  214.0090  184.4310  249.2438 C   0  0  0  0  0  0  0  0  0  0  0  0
  213.9950  183.0591  248.7709 N   0  0  0  0  0  0  0  0  0  0  0  0
  212.6901  182.4825  248.4933 C   0  0  0  0  0  0  0  0  0  0  0  0
  213.0352  181.2574  247.6600 C   0  0  0  0  0  0  0  0  0  0  0  0
  214.1922  181.7525  246.8089 C   0  0  0  0  0  0  0  0  0  0  0  0
  214.9462  182.6979  247.7322 C   0  0  0  0  0  0  0  0  0  0  0  0
  214.4132  187.1813  244.8031 O   0  0  0  0  0  0  0  0  0  0  0  0
  213.0011  184.5871  244.6183 C   0  0  0  0  0  0  0  0  0  0  0  0
  213.3254  186.4002  241.9236 C   0  0  0  0  0  0  0  0  0  0  0  0
  214.8065  186.4758  245.3329 H   0  0  0  0  0  0  0  0  0  0  0  0
  1  2  1  0  0  0  0
  2  6  1  0  0  0  0
  2  3  1  0  0  0  0
  2 20  1  0  0  0  0
  3  8  1  1  0  0  0
  3  4  1  0  0  0  0
  4  5  1  0  0  0  0
  5  6  1  0  0  0  0
  6  7  1  0  0  0  0
  6 19  1  1  0  0  0
  7  8  1  0  0  0  0
  7  9  1  1  0  0  0
  7 18  1  0  0  0  0
  9 10  1  0  0  0  0
 10 11  3  0  0  0  0
 11 12  1  0  0  0  0
 12 13  1  0  0  0  0
 13 17  1  0  0  0  0
 13 14  1  0  0  0  0
 14 15  1  0  0  0  0
 15 16  1  0  0  0  0
 16 17  1  0  0  0  0
 18 21  1  0  0  0  0
M  END
>  <CHROM.1>
59.74641449,-67.48131555,-87.66186719,-120.47784443,-67.18477589,212.84170847
185.31454532,245.60161600,2.53789188,-1.22526940,0.06144776

>  <Name>


>  <RI>
0

>  <Rbt.Current_Directory>
/data/dnb03/galaxy_db/job_working_directory/014/442/14442310/working

>  <Rbt.Executable>
rbdock ($Id: //depot/dev/client3/rdock/2013.1/src/exe/rbdock.cxx#4 $)

>  <Rbt.Library>
libRbt.so (2013.1, Build901 2013/11/27)

>  <Rbt.Parameter_File>
/usr/local/tools/_conda/envs/__rdock@2013.1-0/share/rdock-2013.1-1/data/scripts/dock.prm

>  <Rbt.Receptor>
receptor.prm

>  <SCORE>
7.71613

>  <SCORE.INTER>
9.4

>  <SCORE.INTER.CONST>
1

>  <SCORE.INTER.POLAR>
0

>  <SCORE.INTER.REPUL>
0

>  <SCORE.INTER.ROT>
4

>  <SCORE.INTER.VDW>
0

>  <SCORE.INTER.norm>
0.47

>  <SCORE.INTRA>
-1.68387

>  <SCORE.INTRA.DIHEDRAL>
-1.60975

>  <SCORE.INTRA.DIHEDRAL.0>
1.92909

>  <SCORE.INTRA.POLAR>
0

>  <SCORE.INTRA.POLAR.0>
0

>  <SCORE.INTRA.REPUL>
0

>  <SCORE.INTRA.REPUL.0>
0

>  <SCORE.INTRA.VDW>
-0.878992

>  <SCORE.INTRA.VDW.0>
-1.08818

>  <SCORE.INTRA.norm>
-0.0841935

>  <SCORE.RESTR>


>  <SCORE.RESTR.norm>
0

>  <SCORE.SYSTEM>
0

>  <SCORE.SYSTEM.CONST>
0

>  <SCORE.SYSTEM.DIHEDRAL>
0

>  <SCORE.SYSTEM.norm>
0

>  <SCORE.heavy>
20

>  <SCORE.norm>
0.385807

>  <TransFSReceptor>
receptor

>  <TransFSScore>
0.000613

$$$$

 OpenBabel01192115203D
libRbt.so/2013.1/901 2013/11/27
 28 31  0  0  0  0  0  0  0  0999 V2000
  204.8512  190.4629  248.1590 C   0  0  0  0  0  0  0  0  0  0  0  0
  204.6488  191.2119  246.8886 C   0  0  0  0  0  0  0  0  0  0  0  0
  204.0264  192.4038  246.9505 N   0  0  0  0  0  0  0  0  0  0  0  0
  203.8093  192.7517  245.6568 N   0  0  0  0  0  0  0  0  0  0  0  0
  204.5212  191.9103  244.7991 C   0  0  0  0  0  0  0  0  0  0  0  0
  204.9965  190.8439  245.5470 C   0  0  0  0  0  0  0  0  0  0  0  0
  205.6081  189.6157  244.9588 C   0  0  1  0  0  0  0  0  0  0  0  0
  207.0683  189.7702  244.5953 C   0  0  0  0  0  0  0  0  0  0  0  0
  207.7416  190.7345  243.8612 C   0  0  0  0  0  0  0  0  0  0  0  0
  209.0375  190.4375  243.4041 C   0  0  0  0  0  0  0  0  0  0  0  0
  209.6318  189.1932  243.6754 C   0  0  0  0  0  0  0  0  0  0  0  0
  208.9761  188.2453  244.4604 C   0  0  0  0  0  0  0  0  0  0  0  0
  207.7123  188.5641  244.9076 C   0  0  0  0  0  0  0  0  0  0  0  0
  206.8785  187.7512  245.6670 N   0  0  0  0  0  0  0  0  0  0  0  0
  205.6189  188.3310  245.8248 C   0  0  0  0  0  0  0  0  0  0  0  0
  204.6987  187.8565  246.4736 O   0  0  0  0  0  0  0  0  0  0  0  0
  204.9553  189.2519  243.7244 O   0  0  0  0  0  0  0  0  0  0  0  0
  204.6806  192.1335  243.4662 N   0  0  0  0  0  0  0  0  0  0  0  0
  203.0051  193.8632  245.2748 C   0  0  0  0  0  0  0  0  0  0  0  0
  202.3582  194.6273  246.2621 C   0  0  0  0  0  0  0  0  0  0  0  0
  201.3674  195.5403  245.9161 C   0  0  0  0  0  0  0  0  0  0  0  0
  201.0509  195.7323  244.5760 C   0  0  0  0  0  0  0  0  0  0  0  0
  201.7785  195.0678  243.5844 C   0  0  0  0  0  0  0  0  0  0  0  0
  202.7750  194.1453  243.9271 C   0  0  0  0  0  0  0  0  0  0  0  0
  207.1120  186.8483  246.0442 H   0  0  0  0  0  0  0  0  0  0  0  0
  204.9482  190.0731  243.2005 H   0  0  0  0  0  0  0  0  0  0  0  0
  203.9094  191.9717  242.8208 H   0  0  0  0  0  0  0  0  0  0  0  0
  205.2972  192.8855  243.1659 H   0  0  0  0  0  0  0  0  0  0  0  0
  1  2  1  0  0  0  0
  2  6  1  0  0  0  0
  2  3  2  0  0  0  0
  3  4  1  0  0  0  0
  4  5  1  0  0  0  0
  4 19  1  0  0  0  0
  5  6  2  0  0  0  0
  5 18  1  0  0  0  0
  6  7  1  0  0  0  0
  7 15  1  0  0  0  0
  7  8  1  0  0  0  0
  7 17  1  6  0  0  0
  8 13  1  0  0  0  0
  8  9  2  0  0  0  0
  9 10  1  0  0  0  0
 10 11  2  0  0  0  0
 11 12  1  0  0  0  0
 12 13  2  0  0  0  0
 13 14  1  0  0  0  0
 14 15  1  0  0  0  0
 14 25  1  0  0  0  0
 15 16  2  0  0  0  0
 17 26  1  0  0  0  0
 18 27  1  0  0  0  0
 18 28  1  0  0  0  0
 19 24  1  0  0  0  0
 19 20  2  0  0  0  0
 20 21  1  0  0  0  0
 21 22  2  0  0  0  0
 22 23  1  0  0  0  0
 23 24  2  0  0  0  0
M  END
>  <CHROM.1>
-2.16017329,-74.91094989,-103.52013687,50.49059721,205.06094509,191.22149577
245.10733675,0.53540276,-0.65746196,2.40586400

>  <Name>


>  <RI>
0

>  <Rbt.Current_Directory>
/data/dnb03/galaxy_db/job_working_directory/014/442/14442311/working

>  <Rbt.Executable>
rbdock ($Id: //depot/dev/client3/rdock/2013.1/src/exe/rbdock.cxx#4 $)

>  <Rbt.Library>
libRbt.so (2013.1, Build901 2013/11/27)

>  <Rbt.Parameter_File>
/usr/local/tools/_conda/envs/__rdock@2013.1-0/share/rdock-2013.1-1/data/scripts/dock.prm

>  <Rbt.Receptor>
receptor.prm

>  <SCORE>
4.72826

>  <SCORE.INTER>
8.4

>  <SCORE.INTER.CONST>
1

>  <SCORE.INTER.POLAR>
0

>  <SCORE.INTER.REPUL>
0

>  <SCORE.INTER.ROT>
3

>  <SCORE.INTER.VDW>
0

>  <SCORE.INTER.norm>
0.35

>  <SCORE.INTRA>
-3.67174

>  <SCORE.INTRA.DIHEDRAL>
-3.22669

>  <SCORE.INTRA.DIHEDRAL.0>
4.8232

>  <SCORE.INTRA.POLAR>
-0.721099

>  <SCORE.INTRA.POLAR.0>
-0.0716815

>  <SCORE.INTRA.REPUL>
0

>  <SCORE.INTRA.REPUL.0>
0

>  <SCORE.INTRA.VDW>
0.393337

>  <SCORE.INTRA.VDW.0>
-2.70112

>  <SCORE.INTRA.norm>
-0.152989

>  <SCORE.RESTR>


>  <SCORE.RESTR.norm>
0

>  <SCORE.SYSTEM>
0

>  <SCORE.SYSTEM.CONST>
0

>  <SCORE.SYSTEM.DIHEDRAL>
0

>  <SCORE.SYSTEM.norm>
0

>  <SCORE.heavy>
24

>  <SCORE.norm>
0.197011

>  <TransFSReceptor>
receptor

>  <TransFSScore>
0.000107

$$$$

 OpenBabel01192115203D
libRbt.so/2013.1/901 2013/11/27
  8  7  0  0  0  0  0  0  0  0999 V2000
  184.9572  208.9461  255.4109 C   0  0  0  0  0  0  0  0  0  0  0  0
  186.3180  209.6196  255.5209 C   0  0  0  0  0  0  0  0  0  0  0  0
  186.3131  210.8684  256.4211 C   0  0  0  0  0  0  0  0  0  0  0  0
  187.6962  211.4989  256.6625 C   0  0  0  0  0  0  0  0  0  0  0  0
  187.7263  212.6476  257.6640 C   0  0  0  0  0  0  0  0  0  0  0  0
  185.3727  211.8444  255.8623 N   0  0  0  0  0  0  0  0  0  0  0  0
  185.7563  212.2460  255.0067 H   0  0  0  0  0  0  0  0  0  0  0  0
  185.2553  212.6204  256.5118 H   0  0  0  0  0  0  0  0  0  0  0  0
  1  2  1  0  0  0  0
  2  3  1  0  0  0  0
  3  4  1  0  0  0  0
  3  6  1  0  0  0  0
  4  5  1  0  0  0  0
  6  7  1  0  0  0  0
  6  8  1  0  0  0  0
M  END
>  <CHROM.1>
174.51119469,-173.99353161,-71.61575070,186.37655886,210.93725238,256.25011200
-2.19175449,-0.40426611,0.27247067

>  <Name>


>  <RI>
0

>  <Rbt.Current_Directory>
/data/dnb03/galaxy_db/job_working_directory/014/442/14442312/working

>  <Rbt.Executable>
rbdock ($Id: //depot/dev/client3/rdock/2013.1/src/exe/rbdock.cxx#4 $)

>  <Rbt.Library>
libRbt.so (2013.1, Build901 2013/11/27)

>  <Rbt.Parameter_File>
/usr/local/tools/_conda/envs/__rdock@2013.1-0/share/rdock-2013.1-1/data/scripts/dock.prm

>  <Rbt.Receptor>
receptor.prm

>  <SCORE>
7.30636

>  <SCORE.INTER>
8.4

>  <SCORE.INTER.CONST>
1

>  <SCORE.INTER.POLAR>
0

>  <SCORE.INTER.REPUL>
0

>  <SCORE.INTER.ROT>
3

>  <SCORE.INTER.VDW>
0

>  <SCORE.INTER.norm>
1.4

>  <SCORE.INTRA>
-1.09364

>  <SCORE.INTRA.DIHEDRAL>
0.31146

>  <SCORE.INTRA.DIHEDRAL.0>
0.288587

>  <SCORE.INTRA.POLAR>
0

>  <SCORE.INTRA.POLAR.0>
0

>  <SCORE.INTRA.REPUL>
0

>  <SCORE.INTRA.REPUL.0>
0

>  <SCORE.INTRA.VDW>
-1.24937

>  <SCORE.INTRA.VDW.0>
1.42084

>  <SCORE.INTRA.norm>
-0.182273

>  <SCORE.RESTR>


>  <SCORE.RESTR.norm>
0

>  <SCORE.SYSTEM>
0

>  <SCORE.SYSTEM.CONST>
0

>  <SCORE.SYSTEM.DIHEDRAL>
0

>  <SCORE.SYSTEM.norm>
0

>  <SCORE.heavy>
6

>  <SCORE.norm>
1.21773

>  <TransFSReceptor>
receptor

>  <TransFSScore>
0.053751

$$$$

 OpenBabel01192115203D
libRbt.so/2013.1/901 2013/11/27
 14 14  0  0  0  0  0  0  0  0999 V2000
  188.9203  213.7195  257.9483 C   0  0  0  0  0  0  0  0  0  0  0  0
  187.7340  212.9494  258.1542 O   0  0  0  0  0  0  0  0  0  0  0  0
  186.9640  213.3041  259.2094 C   0  0  0  0  0  0  0  0  0  0  0  0
  187.2108  214.2308  259.9694 O   0  0  0  0  0  0  0  0  0  0  0  0
  185.7375  212.4647  259.3249 C   0  0  0  0  0  0  0  0  0  0  0  0
  185.6539  211.1237  259.1833 C   0  0  0  0  0  0  0  0  0  0  0  0
  186.7483  210.1949  258.8875 C   0  0  0  0  0  0  0  0  0  0  0  0
  188.0555  210.5105  259.2761 C   0  0  0  0  0  0  0  0  0  0  0  0
  189.0884  209.5928  259.0770 C   0  0  0  0  0  0  0  0  0  0  0  0
  188.8215  208.3597  258.4843 C   0  0  0  0  0  0  0  0  0  0  0  0
  187.5278  208.0547  258.0628 C   0  0  0  0  0  0  0  0  0  0  0  0
  186.4928  208.9732  258.2555 C   0  0  0  0  0  0  0  0  0  0  0  0
  184.5439  213.1787  259.6514 C   0  0  0  0  0  0  0  0  0  0  0  0
  183.5432  213.7077  259.9058 N   0  0  0  0  0  0  0  0  0  0  0  0
  1  2  1  0  0  0  0
  2  3  1  0  0  0  0
  3  4  2  0  0  0  0
  3  5  1  0  0  0  0
  5  6  2  0  0  0  0
  5 13  1  0  0  0  0
  6  7  1  0  0  0  0
  7 12  1  0  0  0  0
  7  8  2  0  0  0  0
  8  9  1  0  0  0  0
  9 10  2  0  0  0  0
 10 11  1  0  0  0  0
 11 12  2  0  0  0  0
 13 14  3  0  0  0  0
M  END
>  <CHROM.1>
0.78820088,43.49139071,27.71020263,186.97240797,211.54099871,258.94721560
-2.03288769,-0.22356622,-3.05108224

>  <Name>


>  <RI>
0

>  <Rbt.Current_Directory>
/data/dnb03/galaxy_db/job_working_directory/014/442/14442313/working

>  <Rbt.Executable>
rbdock ($Id: //depot/dev/client3/rdock/2013.1/src/exe/rbdock.cxx#4 $)

>  <Rbt.Library>
libRbt.so (2013.1, Build901 2013/11/27)

>  <Rbt.Parameter_File>
/usr/local/tools/_conda/envs/__rdock@2013.1-0/share/rdock-2013.1-1/data/scripts/dock.prm

>  <Rbt.Receptor>
receptor.prm

>  <SCORE>
6.10605

>  <SCORE.INTER>
8.4

>  <SCORE.INTER.CONST>
1

>  <SCORE.INTER.POLAR>
0

>  <SCORE.INTER.REPUL>
0

>  <SCORE.INTER.ROT>
3

>  <SCORE.INTER.VDW>
0

>  <SCORE.INTER.norm>
0.6

>  <SCORE.INTRA>
-2.29395

>  <SCORE.INTRA.DIHEDRAL>
-6.29515

>  <SCORE.INTRA.DIHEDRAL.0>
13.9372

>  <SCORE.INTRA.POLAR>
0

>  <SCORE.INTRA.POLAR.0>
0

>  <SCORE.INTRA.REPUL>
0

>  <SCORE.INTRA.REPUL.0>
0

>  <SCORE.INTRA.VDW>
0.853623

>  <SCORE.INTRA.VDW.0>
0.0315656

>  <SCORE.INTRA.norm>
-0.163854

>  <SCORE.RESTR>


>  <SCORE.RESTR.norm>
0

>  <SCORE.SYSTEM>
0

>  <SCORE.SYSTEM.CONST>
0

>  <SCORE.SYSTEM.DIHEDRAL>
0

>  <SCORE.SYSTEM.norm>
0

>  <SCORE.heavy>
14

>  <SCORE.norm>
0.436146

>  <TransFSReceptor>
receptor

>  <TransFSScore>
0.099381

$$$$

 OpenBabel01192115203D
libRbt.so/2013.1/901 2013/11/27
 30 32  0  0  0  0  0  0  0  0999 V2000
  179.9733  211.7176  252.2713 C   0  0  0  0  0  0  0  0  0  0  0  0
  180.0408  211.5039  250.7404 C   0  0  1  0  0  0  0  0  0  0  0  0
  181.0803  210.4670  250.3571 C   0  0  2  0  0  0  0  0  0  0  0  0
  180.8467  209.0678  250.9785 C   0  0  1  0  0  0  0  0  0  0  0  0
  179.3149  208.6422  250.9382 C   0  0  0  0  0  0  0  0  0  0  0  0
  178.2474  209.7612  250.7703 C   0  0  0  0  0  0  0  0  0  0  0  0
  178.8638  210.8939  250.0011 C   0  0  0  0  0  0  0  0  0  0  0  0
  178.7091  210.9237  248.6538 C   0  0  0  0  0  0  0  0  0  0  0  0
  179.6176  211.4910  247.6161 C   0  0  0  0  0  0  0  0  0  0  0  0
  179.4015  211.3537  246.4194 O   0  0  0  0  0  0  0  0  0  0  0  0
  180.6662  212.1671  248.1308 O   0  0  0  0  0  0  0  0  0  0  0  0
  181.5448  212.7023  247.1318 C   0  0  0  0  0  0  0  0  0  0  0  0
  182.6709  213.4819  247.8424 C   0  0  0  0  0  0  0  0  0  0  0  0
  182.1556  214.5803  248.6877 N   0  0  0  0  0  0  0  0  0  0  0  0
  183.0637  214.9039  249.7858 C   0  0  0  0  0  0  0  0  0  0  0  0
  181.8643  215.7637  247.8856 C   0  0  0  0  0  0  0  0  0  0  0  0
  181.8828  208.0399  250.3142 C   0  0  2  0  0  0  0  0  0  0  0  0
  181.9567  206.7314  251.1538 C   0  0  0  0  0  0  0  0  0  0  0  0
  183.1977  205.8896  250.8330 C   0  0  0  0  0  0  0  0  0  0  0  0
  184.4503  206.7055  251.0874 C   0  0  2  0  0  0  0  0  0  0  0  0
  184.5980  207.8747  250.0686 C   0  0  0  0  0  0  0  0  0  0  0  0
  183.3446  208.7586  250.3396 C   0  0  1  0  0  0  0  0  0  0  0  0
  183.4103  210.1065  249.6188 C   0  0  0  0  0  0  0  0  0  0  0  0
  182.4874  210.9733  250.4179 C   0  0  0  0  0  0  0  0  0  0  0  0
  182.8598  211.9565  251.0461 O   0  0  0  0  0  0  0  0  0  0  0  0
  185.9146  208.6310  250.4001 C   0  0  0  0  0  0  0  0  0  0  0  0
  184.7273  207.4622  248.5807 C   0  0  0  0  0  0  0  0  0  0  0  0
  185.6074  205.8780  251.1497 O   0  0  0  0  0  0  0  0  0  0  0  0
  181.3415  207.6206  248.9170 C   0  0  0  0  0  0  0  0  0  0  0  0
  185.5124  205.2642  251.8929 H   0  0  0  0  0  0  0  0  0  0  0  0
  2  1  1  1  0  0  0
  2  7  1  0  0  0  0
  2  3  1  0  0  0  0
  3 24  1  1  0  0  0
  3  4  1  0  0  0  0
  4  5  1  6  0  0  0
  4 17  1  0  0  0  0
  5  6  1  0  0  0  0
  6  7  1  0  0  0  0
  7  8  2  0  0  0  0
  8  9  1  0  0  0  0
  9 10  2  0  0  0  0
  9 11  1  0  0  0  0
 11 12  1  0  0  0  0
 12 13  1  0  0  0  0
 13 14  1  0  0  0  0
 14 15  1  0  0  0  0
 14 16  1  0  0  0  0
 17 22  1  0  0  0  0
 17 18  1  0  0  0  0
 17 29  1  6  0  0  0
 18 19  1  0  0  0  0
 19 20  1  0  0  0  0
 20 21  1  0  0  0  0
 20 28  1  6  0  0  0
 21 22  1  0  0  0  0
 21 26  1  0  0  0  0
 21 27  1  0  0  0  0
 22 23  1  6  0  0  0
 23 24  1  0  0  0  0
 24 25  2  0  0  0  0
 28 30  1  0  0  0  0
M  END
>  <CHROM.1>
174.05431760,179.50291750,178.34406783,-58.67904216,153.70751801,-62.18528706
181.90101782,210.22896580,249.71413883,1.99809912,0.02657252,-0.32644399

>  <Name>


>  <RI>
0

>  <Rbt.Current_Directory>
/data/dnb03/galaxy_db/job_working_directory/014/442/14442330/working

>  <Rbt.Executable>
rbdock ($Id: //depot/dev/client3/rdock/2013.1/src/exe/rbdock.cxx#4 $)

>  <Rbt.Library>
libRbt.so (2013.1, Build901 2013/11/27)

>  <Rbt.Parameter_File>
/usr/local/tools/_conda/envs/__rdock@2013.1-0/share/rdock-2013.1-1/data/scripts/dock.prm

>  <Rbt.Receptor>
receptor.prm

>  <SCORE>
3.5714

>  <SCORE.INTER>
10.4

>  <SCORE.INTER.CONST>
1

>  <SCORE.INTER.POLAR>
0

>  <SCORE.INTER.REPUL>
0

>  <SCORE.INTER.ROT>
5

>  <SCORE.INTER.VDW>
0

>  <SCORE.INTER.norm>
0.358621

>  <SCORE.INTRA>
-6.8286

>  <SCORE.INTRA.DIHEDRAL>
-11.8162

>  <SCORE.INTRA.DIHEDRAL.0>
12.983

>  <SCORE.INTRA.POLAR>
0

>  <SCORE.INTRA.POLAR.0>
0

>  <SCORE.INTRA.REPUL>
0

>  <SCORE.INTRA.REPUL.0>
0

>  <SCORE.INTRA.VDW>
-0.920524

>  <SCORE.INTRA.VDW.0>
0.137106

>  <SCORE.INTRA.norm>
-0.235469

>  <SCORE.RESTR>


>  <SCORE.RESTR.norm>
0

>  <SCORE.SYSTEM>
0

>  <SCORE.SYSTEM.CONST>
0

>  <SCORE.SYSTEM.DIHEDRAL>
0

>  <SCORE.SYSTEM.norm>
0

>  <SCORE.heavy>
29

>  <SCORE.norm>
0.123152

>  <TransFSReceptor>
receptor

>  <TransFSScore>
0.009968

$$$$

 OpenBabel01192115203D
libRbt.so/2013.1/901 2013/11/27
  7  6  0  0  0  0  0  0  0  0999 V2000
  205.7409  202.8671  252.3941 C   0  0  0  0  0  0  0  0  0  0  0  0
  205.6451  204.1168  251.5221 C   0  0  0  0  0  0  0  0  0  0  0  0
  204.8822  205.1374  252.2538 N   0  0  0  0  0  0  0  0  0  0  0  0
  203.9185  205.4997  251.6897 C   0  0  0  0  0  0  0  0  0  0  0  0
  202.9536  205.8499  251.1184 O   0  0  0  0  0  0  0  0  0  0  0  0
  206.5231  201.7728  251.6929 C   0  0  0  0  0  0  0  0  0  0  0  0
  206.5818  200.6815  252.5012 F   0  0  0  0  0  0  0  0  0  0  0  0
  1  2  1  0  0  0  0
  1  6  1  0  0  0  0
  2  3  1  0  0  0  0
  3  4  2  0  0  0  0
  4  5  2  0  0  0  0
  6  7  1  0  0  0  0
M  END
>  <CHROM.1>
-179.87620778,-179.90156870,-121.30960699,205.22769080,203.56354675,251.90068529
-0.95757272,-0.36675564,0.07486908

>  <Name>


>  <RI>
0

>  <Rbt.Current_Directory>
/data/dnb03/galaxy_db/job_working_directory/014/442/14442331/working

>  <Rbt.Executable>
rbdock ($Id: //depot/dev/client3/rdock/2013.1/src/exe/rbdock.cxx#4 $)

>  <Rbt.Library>
libRbt.so (2013.1, Build901 2013/11/27)

>  <Rbt.Parameter_File>
/usr/local/tools/_conda/envs/__rdock@2013.1-0/share/rdock-2013.1-1/data/scripts/dock.prm

>  <Rbt.Receptor>
receptor.prm

>  <SCORE>
6.96455

>  <SCORE.INTER>
8.4

>  <SCORE.INTER.CONST>
1

>  <SCORE.INTER.POLAR>
0

>  <SCORE.INTER.REPUL>
0

>  <SCORE.INTER.ROT>
3

>  <SCORE.INTER.VDW>
0

>  <SCORE.INTER.norm>
1.2

>  <SCORE.INTRA>
-1.43545

>  <SCORE.INTRA.DIHEDRAL>
-2.39723

>  <SCORE.INTRA.DIHEDRAL.0>
2.40015

>  <SCORE.INTRA.POLAR>
0

>  <SCORE.INTRA.POLAR.0>
0

>  <SCORE.INTRA.REPUL>
0

>  <SCORE.INTRA.REPUL.0>
0

>  <SCORE.INTRA.VDW>
-0.236833

>  <SCORE.INTRA.VDW.0>
-0.0775209

>  <SCORE.INTRA.norm>
-0.205064

>  <SCORE.RESTR>


>  <SCORE.RESTR.norm>
0

>  <SCORE.SYSTEM>
0

>  <SCORE.SYSTEM.CONST>
0

>  <SCORE.SYSTEM.DIHEDRAL>
0

>  <SCORE.SYSTEM.norm>
0

>  <SCORE.heavy>
7

>  <SCORE.norm>
0.994936

>  <TransFSReceptor>
receptor

>  <TransFSScore>
0.021953

$$$$

 OpenBabel01192115203D
libRbt.so/2013.1/901 2013/11/27
 38 42  0  0  0  0  0  0  0  0999 V2000
  205.9274  210.4218  250.5793 C   0  0  0  0  0  0  0  0  0  0  0  0
  206.7504  209.4004  251.3561 C   0  0  0  0  0  0  0  0  0  0  0  0
  206.1553  208.0804  251.3586 N   0  0  0  0  0  0  0  0  0  0  0  0
  205.3722  207.5087  252.3550 C   0  0  0  0  0  0  0  0  0  0  0  0
  205.1211  206.2581  251.9882 N   0  0  0  0  0  0  0  0  0  0  0  0
  205.6686  206.0265  250.7496 N   0  0  0  0  0  0  0  0  0  0  0  0
  206.3039  207.1136  250.3922 C   0  0  0  0  0  0  0  0  0  0  0  0
  207.2368  207.2977  248.9475 S   0  0  0  0  0  0  0  0  0  0  0  0
  206.4913  206.0620  247.8405 C   0  0  0  0  0  0  0  0  0  0  0  0
  205.0930  206.5014  247.4563 C   0  0  0  0  0  0  0  0  0  0  0  0
  204.9048  207.0930  246.3943 O   0  0  0  0  0  0  0  0  0  0  0  0
  204.1272  206.2262  248.4126 N   0  0  0  0  0  0  0  0  0  0  0  0
  202.7463  206.4971  248.2850 C   0  0  0  0  0  0  0  0  0  0  0  0
  201.9183  206.2586  249.3873 C   0  0  0  0  0  0  0  0  0  0  0  0
  200.5682  206.5304  249.2579 C   0  0  0  0  0  0  0  0  0  0  0  0
  200.0323  207.0091  248.0856 C   0  0  0  0  0  0  0  0  0  0  0  0
  200.8112  207.2459  246.9812 C   0  0  0  0  0  0  0  0  0  0  0  0
  202.1784  206.9818  247.0867 C   0  0  0  0  0  0  0  0  0  0  0  0
  198.6890  207.2008  248.1608 O   0  0  0  0  0  0  0  0  0  0  0  0
  198.4282  206.7475  249.5023 C   0  0  0  0  0  0  0  0  0  0  0  0
  199.6227  206.3721  250.2242 O   0  0  0  0  0  0  0  0  0  0  0  0
  204.8620  208.1232  253.5995 C   0  0  0  0  0  0  0  0  0  0  0  0
  204.0236  207.3853  254.4564 C   0  0  0  0  0  0  0  0  0  0  0  0
  203.4449  207.9614  255.6006 C   0  0  0  0  0  0  0  0  0  0  0  0
  203.7085  209.2980  255.9109 C   0  0  0  0  0  0  0  0  0  0  0  0
  204.5144  210.0546  255.0645 C   0  0  0  0  0  0  0  0  0  0  0  0
  205.0848  209.4647  253.9338 C   0  0  0  0  0  0  0  0  0  0  0  0
  202.9257  210.0989  257.3013 S   0  0  0  0  0  0  0  0  0  0  0  0
  203.7718  211.2066  257.6946 O   0  0  0  0  0  0  0  0  0  0  0  0
  201.5323  210.3159  256.9453 O   0  0  0  0  0  0  0  0  0  0  0  0
  203.0024  208.9107  258.5319 N   0  0  0  0  0  0  0  0  0  0  0  0
  204.3371  208.3413  258.8183 C   0  0  0  0  0  0  0  0  0  0  0  0
  204.2579  206.8502  259.1581 C   0  0  0  0  0  0  0  0  0  0  0  0
  203.9236  206.5617  260.6165 C   0  0  0  0  0  0  0  0  0  0  0  0
  202.5400  207.0350  261.0336 C   0  0  0  0  0  0  0  0  0  0  0  0
  202.4113  208.5512  260.9942 C   0  0  0  0  0  0  0  0  0  0  0  0
  202.0241  209.0955  259.6288 C   0  0  0  0  0  0  0  0  0  0  0  0
  204.4489  205.9115  249.3262 H   0  0  0  0  0  0  0  0  0  0  0  0
  1  2  1  0  0  0  0
  2  3  1  0  0  0  0
  3  7  1  0  0  0  0
  3  4  1  0  0  0  0
  4  5  2  0  0  0  0
  4 22  1  0  0  0  0
  5  6  1  0  0  0  0
  6  7  2  0  0  0  0
  7  8  1  0  0  0  0
  8  9  1  0  0  0  0
  9 10  1  0  0  0  0
 10 11  2  0  0  0  0
 10 12  1  0  0  0  0
 12 13  1  0  0  0  0
 12 38  1  0  0  0  0
 13 18  1  0  0  0  0
 13 14  2  0  0  0  0
 14 15  1  0  0  0  0
 15 21  1  0  0  0  0
 15 16  2  0  0  0  0
 16 17  1  0  0  0  0
 16 19  1  0  0  0  0
 17 18  2  0  0  0  0
 19 20  1  0  0  0  0
 20 21  1  0  0  0  0
 22 27  1  0  0  0  0
 22 23  2  0  0  0  0
 23 24  1  0  0  0  0
 24 25  2  0  0  0  0
 25 26  1  0  0  0  0
 25 28  1  0  0  0  0
 26 27  2  0  0  0  0
 28 29  2  0  0  0  0
 28 30  2  0  0  0  0
 28 31  1  0  0  0  0
 31 37  1  0  0  0  0
 31 32  1  0  0  0  0
 32 33  1  0  0  0  0
 33 34  1  0  0  0  0
 34 35  1  0  0  0  0
 35 36  1  0  0  0  0
 36 37  1  0  0  0  0
M  END
>  <CHROM.1>
-97.84608375,176.96055141,-157.03128262,69.16385644,96.60327263,-174.82050435
156.35723607,53.36275905,203.60654997,207.87219291,252.88347428,-1.55226371
0.08964602,1.39397090

>  <Name>


>  <RI>
0

>  <Rbt.Current_Directory>
/data/dnb03/galaxy_db/job_working_directory/014/442/14442333/working

>  <Rbt.Executable>
rbdock ($Id: //depot/dev/client3/rdock/2013.1/src/exe/rbdock.cxx#4 $)

>  <Rbt.Library>
libRbt.so (2013.1, Build901 2013/11/27)

>  <Rbt.Parameter_File>
/usr/local/tools/_conda/envs/__rdock@2013.1-0/share/rdock-2013.1-1/data/scripts/dock.prm

>  <Rbt.Receptor>
receptor.prm

>  <SCORE>
7.91655

>  <SCORE.INTER>
13.4

>  <SCORE.INTER.CONST>
1

>  <SCORE.INTER.POLAR>
0

>  <SCORE.INTER.REPUL>
0

>  <SCORE.INTER.ROT>
8

>  <SCORE.INTER.VDW>
0

>  <SCORE.INTER.norm>
0.362162

>  <SCORE.INTRA>
-5.48345

>  <SCORE.INTRA.DIHEDRAL>
-5.77608

>  <SCORE.INTRA.DIHEDRAL.0>
11.6328

>  <SCORE.INTRA.POLAR>
-1

>  <SCORE.INTRA.POLAR.0>
0

>  <SCORE.INTRA.REPUL>
0

>  <SCORE.INTRA.REPUL.0>
0

>  <SCORE.INTRA.VDW>
0.80459

>  <SCORE.INTRA.VDW.0>
-4.74918

>  <SCORE.INTRA.norm>
-0.148201

>  <SCORE.RESTR>


>  <SCORE.RESTR.norm>
0

>  <SCORE.SYSTEM>
0

>  <SCORE.SYSTEM.CONST>
0

>  <SCORE.SYSTEM.DIHEDRAL>
0

>  <SCORE.SYSTEM.norm>
0

>  <SCORE.heavy>
37

>  <SCORE.norm>
0.213961

>  <TransFSReceptor>
receptor

>  <TransFSScore>
0.000005

$$$$

 OpenBabel01192115203D
libRbt.so/2013.1/901 2013/11/27
 17 16  0  0  0  0  0  0  0  0999 V2000
  200.6829  210.0594  251.8295 C   0  0  0  0  0  0  0  0  0  0  0  0
  201.0887  208.7155  251.2527 C   0  0  0  0  0  0  0  0  0  0  0  0
  199.9845  208.1572  250.3642 C   0  0  0  0  0  0  0  0  0  0  0  0
  200.3882  206.8096  249.7832 C   0  0  0  0  0  0  0  0  0  0  0  0
  199.2805  206.2637  248.8981 C   0  0  0  0  0  0  0  0  0  0  0  0
  199.6832  204.9165  248.3193 C   0  0  0  0  0  0  0  0  0  0  0  0
  198.5741  204.3729  247.4349 C   0  0  0  0  0  0  0  0  0  0  0  0
  198.9796  203.0277  246.8587 C   0  0  0  0  0  0  0  0  0  0  0  0
  197.8708  202.4852  245.9747 C   0  0  0  0  0  0  0  0  0  0  0  0
  198.2768  201.1391  245.4008 C   0  0  0  0  0  0  0  0  0  0  0  0
  197.1680  200.5945  244.5178 C   0  0  0  0  0  0  0  0  0  0  0  0
  197.5756  199.2497  243.9417 C   0  0  0  0  0  0  0  0  0  0  0  0
  196.4608  198.6958  243.0670 C   0  0  0  0  0  0  0  0  0  0  0  0
  196.8680  197.3510  242.4856 C   0  0  0  0  0  0  0  0  0  0  0  0
  195.7542  196.7960  241.6080 C   0  0  0  0  0  0  0  0  0  0  0  0
  196.1518  195.4497  241.0201 C   0  0  0  0  0  0  0  0  0  0  0  0
  195.0437  194.9016  240.1474 C   0  0  0  0  0  0  0  0  0  0  0  0
  1  2  1  0  0  0  0
  2  3  1  0  0  0  0
  3  4  1  0  0  0  0
  4  5  1  0  0  0  0
  5  6  1  0  0  0  0
  6  7  1  0  0  0  0
  7  8  1  0  0  0  0
  8  9  1  0  0  0  0
  9 10  1  0  0  0  0
 10 11  1  0  0  0  0
 11 12  1  0  0  0  0
 12 13  1  0  0  0  0
 13 14  1  0  0  0  0
 14 15  1  0  0  0  0
 15 16  1  0  0  0  0
 16 17  1  0  0  0  0
M  END
>  <CHROM.1>
179.96763935,-179.93281523,-179.92340837,179.99189045,179.99956941,-179.98276362
-179.91304723,179.92969724,179.87363118,179.46527840,179.83990942,-179.91034240
179.97384520,-179.94039095,198.22234239,202.29480906,246.05261631,1.25725972
-0.41124174,0.52794412

>  <Name>


>  <RI>
0

>  <Rbt.Current_Directory>
/data/dnb03/galaxy_db/job_working_directory/014/442/14442334/working

>  <Rbt.Executable>
rbdock ($Id: //depot/dev/client3/rdock/2013.1/src/exe/rbdock.cxx#4 $)

>  <Rbt.Library>
libRbt.so (2013.1, Build901 2013/11/27)

>  <Rbt.Parameter_File>
/usr/local/tools/_conda/envs/__rdock@2013.1-0/share/rdock-2013.1-1/data/scripts/dock.prm

>  <Rbt.Receptor>
receptor.prm

>  <SCORE>
19.4006

>  <SCORE.INTER>
19.4

>  <SCORE.INTER.CONST>
1

>  <SCORE.INTER.POLAR>
0

>  <SCORE.INTER.REPUL>
0

>  <SCORE.INTER.ROT>
14

>  <SCORE.INTER.VDW>
0

>  <SCORE.INTER.norm>
1.14118

>  <SCORE.INTRA>
0.000583681

>  <SCORE.INTRA.DIHEDRAL>
0.00116979

>  <SCORE.INTRA.DIHEDRAL.0>
0.000357351

>  <SCORE.INTRA.POLAR>
0

>  <SCORE.INTRA.POLAR.0>
0

>  <SCORE.INTRA.REPUL>
0

>  <SCORE.INTRA.REPUL.0>
0

>  <SCORE.INTRA.VDW>
-1.21591e-06

>  <SCORE.INTRA.VDW.0>
-1.99439

>  <SCORE.INTRA.norm>
3.43342e-05

>  <SCORE.RESTR>


>  <SCORE.RESTR.norm>
0

>  <SCORE.SYSTEM>
0

>  <SCORE.SYSTEM.CONST>
0

>  <SCORE.SYSTEM.DIHEDRAL>
0

>  <SCORE.SYSTEM.norm>
0

>  <SCORE.heavy>
17

>  <SCORE.norm>
1.14121

>  <TransFSReceptor>
receptor

>  <TransFSScore>
0.018299

$$$$

 OpenBabel01192115203D
libRbt.so/2013.1/901 2013/11/27
 61 65  0  0  0  0  0  0  0  0999 V2000
  213.9659  184.5111  249.5565 C   0  0  0  0  0  0  0  0  0  0  0  0
  215.3258  184.5903  250.2311 C   0  0  0  0  0  0  0  0  0  0  0  0
  216.0188  183.4315  250.5200 C   0  0  0  0  0  0  0  0  0  0  0  0
  217.2628  183.4963  251.1258 C   0  0  0  0  0  0  0  0  0  0  0  0
  217.8061  184.7235  251.4457 C   0  0  0  0  0  0  0  0  0  0  0  0
  219.1605  184.5311  252.0928 C   0  0  0  0  0  0  0  0  0  0  0  0
  219.1933  183.0508  252.5288 C   0  0  1  0  0  0  0  0  0  0  0  0
  218.2134  182.3921  251.5346 O   0  0  0  0  0  0  0  0  0  0  0  0
  220.5904  182.4678  252.3920 C   0  0  0  0  0  0  0  0  0  0  0  0
  221.2413  181.8808  253.4392 C   0  0  0  0  0  0  0  0  0  0  0  0
  220.5517  181.7349  254.7859 C   0  0  0  0  0  0  0  0  0  0  0  0
  221.2057  181.1493  255.8251 C   0  0  0  0  0  0  0  0  0  0  0  0
  220.5160  181.0033  257.1718 C   0  0  0  0  0  0  0  0  0  0  0  0
  219.3284  181.4284  257.3269 O   0  0  0  0  0  0  0  0  0  0  0  0
  222.6260  180.6408  255.6396 C   0  0  0  0  0  0  0  0  0  0  0  0
  221.2413  181.8808  253.4392 C   0  0  0  0  0  0  0  0  0  0  0  0
  222.5176  181.4260  253.2659 O   0  0  0  0  0  0  0  0  0  0  0  0
  223.1435  181.5331  252.0828 C   0  0  2  0  0  0  0  0  0  0  0  0
  222.5523  182.0957  251.0146 C   0  0  0  0  0  0  0  0  0  0  0  0
  221.2937  182.5753  251.1058 C   0  0  0  0  0  0  0  0  0  0  0  0
  223.2668  180.0804  251.6529 C   0  0  0  0  0  0  0  0  0  0  0  0
  224.4088  182.3349  252.3412 C   0  0  0  0  0  0  0  0  0  0  0  0
  225.2467  181.6328  253.3972 C   0  0  0  0  0  0  0  0  0  0  0  0
  226.6362  182.2481  253.4330 C   0  0  0  0  0  0  0  0  0  0  0  0
  227.5112  181.4676  254.4002 C   0  0  1  0  0  0  0  0  0  0  0  0
  228.8952  181.2868  253.7983 C   0  0  0  0  0  0  0  0  0  0  0  0
  227.6240  182.2306  255.7100 C   0  0  0  0  0  0  0  0  0  0  0  0
  226.2697  182.2565  256.3995 C   0  0  0  0  0  0  0  0  0  0  0  0
  226.3911  182.9860  257.7275 C   0  0  0  0  0  0  0  0  0  0  0  0
  225.0044  183.3393  258.2401 C   0  0  1  0  0  0  0  0  0  0  0  0
  225.0806  183.6679  259.7221 C   0  0  0  0  0  0  0  0  0  0  0  0
  224.4755  184.5449  257.4805 C   0  0  0  0  0  0  0  0  0  0  0  0
  223.6930  184.0747  256.2651 C   0  0  0  0  0  0  0  0  0  0  0  0
  223.4108  185.2589  255.3550 C   0  0  0  0  0  0  0  0  0  0  0  0
  222.3186  184.8880  254.3649 C   0  0  0  0  0  0  0  0  0  0  0  0
  220.9583  185.0840  255.0141 C   0  0  0  0  0  0  0  0  0  0  0  0
  222.4261  185.7759  253.1359 C   0  0  0  0  0  0  0  0  0  0  0  0
  217.1062  185.8943  251.1604 C   0  0  0  0  0  0  0  0  0  0  0  0
  215.8649  185.8239  250.5536 C   0  0  0  0  0  0  0  0  0  0  0  0
  215.0793  187.0685  250.2243 O   0  0  0  0  0  0  0  0  0  0  0  0
  215.6246  188.2505  251.0296 C   0  0  2  0  0  0  0  0  0  0  0  0
  217.1528  188.2652  250.8875 C   0  0  0  0  0  0  0  0  0  0  0  0
  217.6732  187.0830  251.4954 C   0  0  0  0  0  0  0  0  0  0  0  0
  215.2354  188.1124  252.4924 C   0  0  0  0  0  0  0  0  0  0  0  0
  215.0457  189.5493  250.4925 C   0  0  0  0  0  0  0  0  0  0  0  0
  215.3089  189.6416  248.9983 C   0  0  0  0  0  0  0  0  0  0  0  0
  214.7495  190.9506  248.4653 C   0  0  0  0  0  0  0  0  0  0  0  0
  215.2099  191.1514  247.0307 C   0  0  1  0  0  0  0  0  0  0  0  0
  214.1440  191.9114  246.2582 C   0  0  0  0  0  0  0  0  0  0  0  0
  216.5058  191.9457  247.0209 C   0  0  0  0  0  0  0  0  0  0  0  0
  217.6267  191.0937  247.5939 C   0  0  0  0  0  0  0  0  0  0  0  0
  218.8881  191.9325  247.7177 C   0  0  0  0  0  0  0  0  0  0  0  0
  219.9270  191.1693  248.5231 C   0  0  1  0  0  0  0  0  0  0  0  0
  221.2718  191.8681  248.4068 C   0  0  0  0  0  0  0  0  0  0  0  0
  219.5040  191.1243  249.9823 C   0  0  0  0  0  0  0  0  0  0  0  0
  220.2568  190.0120  250.6940 C   0  0  0  0  0  0  0  0  0  0  0  0
  219.8041  189.9405  252.1433 C   0  0  0  0  0  0  0  0  0  0  0  0
  220.5481  188.8203  252.8518 C   0  0  0  0  0  0  0  0  0  0  0  0
  221.9453  189.2930  253.2188 C   0  0  0  0  0  0  0  0  0  0  0  0
  219.7964  188.4323  254.1147 C   0  0  0  0  0  0  0  0  0  0  0  0
  215.4148  182.0807  250.1722 C   0  0  0  0  0  0  0  0  0  0  0  0
  1  2  1  0  0  0  0
  2 39  1  0  0  0  0
  2  3  2  0  0  0  0
  3  4  1  0  0  0  0
  3 61  1  0  0  0  0
  4  8  1  0  0  0  0
  4  5  2  0  0  0  0
  5  6  1  0  0  0  0
  5 38  1  0  0  0  0
  7  6  1  6  0  0  0
  7 13  1  0  0  0  0
  7  8  1  0  0  0  0
  7  9  1  0  0  0  0
  9 20  1  0  0  0  0
  9 10  2  0  0  0  0
 10 11  1  0  0  0  0
 10 17  1  0  0  0  0
 11 12  2  0  0  0  0
 11 16  1  0  0  0  0
 12 13  1  0  0  0  0
 12 15  1  0  0  0  0
 13 14  2  0  0  0  0
 17 18  1  0  0  0  0
 18 19  1  0  0  0  0
 18 21  1  6  0  0  0
 18 22  1  0  0  0  0
 19 20  1  0  0  0  0
 22 23  1  0  0  0  0
 23 24  1  0  0  0  0
 24 25  1  0  0  0  0
 25 26  1  6  0  0  0
 25 27  1  0  0  0  0
 27 28  1  0  0  0  0
 28 29  1  0  0  0  0
 29 30  1  0  0  0  0
 30 31  1  1  0  0  0
 30 32  1  0  0  0  0
 32 33  1  0  0  0  0
 33 34  1  0  0  0  0
 34 35  1  0  0  0  0
 35 36  1  0  0  0  0
 35 37  1  0  0  0  0
 38 43  1  0  0  0  0
 38 39  2  0  0  0  0
 39 40  1  0  0  0  0
 40 41  1  0  0  0  0
 41 42  1  0  0  0  0
 41 44  1  1  0  0  0
 41 45  1  0  0  0  0
 42 43  1  0  0  0  0
 45 46  1  0  0  0  0
 46 47  1  0  0  0  0
 47 48  1  0  0  0  0
 48 49  1  6  0  0  0
 48 50  1  0  0  0  0
 50 51  1  0  0  0  0
 51 52  1  0  0  0  0
 52 53  1  0  0  0  0
 53 54  1  1  0  0  0
 53 55  1  0  0  0  0
 55 56  1  0  0  0  0
 56 57  1  0  0  0  0
 57 58  1  0  0  0  0
 58 59  1  0  0  0  0
 58 60  1  0  0  0  0
M  END
>  <CHROM.1>
57.55828067,167.34867436,-175.03910314,138.30715669,67.22389433,178.43942650
165.02098970,162.66379186,91.09505078,-168.39505558,-164.13333650,83.52448055
-54.01345459,-179.10506678,170.68309842,148.23558676,69.05968451,-174.20319540
169.51561099,168.38260474,161.49043801,-178.36016833,179.50641954,79.02143811
220.31154130,185.35927316,252.40867468,2.34052940,-0.39890630,-0.34303058

>  <Name>


>  <RI>
0

>  <Rbt.Current_Directory>
/data/dnb03/galaxy_db/job_working_directory/014/442/14442335/working

>  <Rbt.Executable>
rbdock ($Id: //depot/dev/client3/rdock/2013.1/src/exe/rbdock.cxx#4 $)

>  <Rbt.Library>
libRbt.so (2013.1, Build901 2013/11/27)

>  <Rbt.Parameter_File>
/usr/local/tools/_conda/envs/__rdock@2013.1-0/share/rdock-2013.1-1/data/scripts/dock.prm

>  <Rbt.Receptor>
receptor.prm

>  <SCORE>
19.3837

>  <SCORE.INTER>
29.4

>  <SCORE.INTER.CONST>
1

>  <SCORE.INTER.POLAR>
0

>  <SCORE.INTER.REPUL>
0

>  <SCORE.INTER.ROT>
24

>  <SCORE.INTER.VDW>
0

>  <SCORE.INTER.norm>
0.481967

>  <SCORE.INTRA>
-10.0163

>  <SCORE.INTRA.DIHEDRAL>
23.7095

>  <SCORE.INTRA.DIHEDRAL.0>
0.242419

>  <SCORE.INTRA.POLAR>
0

>  <SCORE.INTRA.POLAR.0>
0

>  <SCORE.INTRA.REPUL>
0

>  <SCORE.INTRA.REPUL.0>
0

>  <SCORE.INTRA.VDW>
-21.871

>  <SCORE.INTRA.VDW.0>
17.7542

>  <SCORE.INTRA.norm>
-0.164201

>  <SCORE.RESTR>


>  <SCORE.RESTR.norm>
0

>  <SCORE.SYSTEM>
0

>  <SCORE.SYSTEM.CONST>
0

>  <SCORE.SYSTEM.DIHEDRAL>
0

>  <SCORE.SYSTEM.norm>
0

>  <SCORE.heavy>
61

>  <SCORE.norm>
0.317766

>  <TransFSReceptor>
receptor

>  <TransFSScore>
0.046459

$$$$

 OpenBabel01192115203D
libRbt.so/2013.1/901 2013/11/27
 20 19  0  0  0  0  0  0  0  0999 V2000
  197.7225  208.4668  247.0871 C   0  0  0  0  0  0  0  0  0  0  0  0
  198.9463  209.0107  247.7531 C   0  0  0  0  0  0  0  0  0  0  0  0
  199.9622  208.3657  247.9719 O   0  0  0  0  0  0  0  0  0  0  0  0
  198.7467  210.3128  248.0955 O   0  0  0  0  0  0  0  0  0  0  0  0
  199.8462  210.9562  248.7620 C   0  0  0  0  0  0  0  0  0  0  0  0
  199.5243  212.4182  249.0976 C   0  0  0  0  0  0  0  0  0  0  0  0
  198.3816  212.4855  249.9752 N   0  0  0  0  0  0  0  0  0  0  0  0
  197.1830  212.8824  249.7798 C   0  0  0  0  0  0  0  0  0  0  0  0
  196.3222  213.4343  248.6454 C   0  0  0  0  0  0  0  0  0  0  0  0
  195.2690  214.1550  248.5631 N   0  0  0  0  0  0  0  0  0  0  0  0
  194.4613  214.7803  249.5845 C   0  0  0  0  0  0  0  0  0  0  0  0
  193.0898  214.0906  249.6036 C   0  0  0  0  0  0  0  0  0  0  0  0
  193.2069  212.6915  249.9054 O   0  0  0  0  0  0  0  0  0  0  0  0
  192.0469  211.9902  249.9484 C   0  0  0  0  0  0  0  0  0  0  0  0
  190.9322  212.4531  249.7402 O   0  0  0  0  0  0  0  0  0  0  0  0
  192.3052  210.5535  250.2723 C   0  0  0  0  0  0  0  0  0  0  0  0
  196.8873  212.9608  247.0600 S   0  0  0  0  0  0  0  0  0  0  0  0
  196.2066  212.7565  251.2238 S   0  0  0  0  0  0  0  0  0  0  0  0
  197.6307  211.8983  247.2804 H   0  0  0  0  0  0  0  0  0  0  0  0
  197.1921  212.2807  251.9965 H   0  0  0  0  0  0  0  0  0  0  0  0
  1  2  1  0  0  0  0
  2  3  2  0  0  0  0
  2  4  1  0  0  0  0
  4  5  1  0  0  0  0
  5  6  1  0  0  0  0
  6  7  1  0  0  0  0
  7  8  2  0  0  0  0
  8  9  1  0  0  0  0
  8 18  1  0  0  0  0
  9 10  2  0  0  0  0
  9 17  1  0  0  0  0
 10 11  1  0  0  0  0
 11 12  1  0  0  0  0
 12 13  1  0  0  0  0
 13 14  1  0  0  0  0
 14 15  2  0  0  0  0
 14 16  1  0  0  0  0
 17 19  1  0  0  0  0
 18 20  1  0  0  0  0
M  END
>  <CHROM.1>
179.29442580,179.70721504,60.56635598,-109.21320001,-155.63624586,0.87670928
20.64622829,-112.64569179,60.55739968,179.89148353,0.72191734,196.20493020
212.00640030,249.06814057,0.45513016,-0.16431794,-2.89704891

>  <Name>


>  <RI>
0

>  <Rbt.Current_Directory>
/data/dnb03/galaxy_db/job_working_directory/014/442/14442336/working

>  <Rbt.Executable>
rbdock ($Id: //depot/dev/client3/rdock/2013.1/src/exe/rbdock.cxx#4 $)

>  <Rbt.Library>
libRbt.so (2013.1, Build901 2013/11/27)

>  <Rbt.Parameter_File>
/usr/local/tools/_conda/envs/__rdock@2013.1-0/share/rdock-2013.1-1/data/scripts/dock.prm

>  <Rbt.Receptor>
receptor.prm

>  <SCORE>
4.59783

>  <SCORE.INTER>
16.4

>  <SCORE.INTER.CONST>
1

>  <SCORE.INTER.POLAR>
0

>  <SCORE.INTER.REPUL>
0

>  <SCORE.INTER.ROT>
11

>  <SCORE.INTER.VDW>
0

>  <SCORE.INTER.norm>
0.911111

>  <SCORE.INTRA>
-11.8022

>  <SCORE.INTRA.DIHEDRAL>
-4.03779

>  <SCORE.INTRA.DIHEDRAL.0>
6.88445

>  <SCORE.INTRA.POLAR>
-1

>  <SCORE.INTRA.POLAR.0>
0

>  <SCORE.INTRA.REPUL>
0

>  <SCORE.INTRA.REPUL.0>
0

>  <SCORE.INTRA.VDW>
-6.38328

>  <SCORE.INTRA.VDW.0>
4.59771

>  <SCORE.INTRA.norm>
-0.655676

>  <SCORE.RESTR>


>  <SCORE.RESTR.norm>
0

>  <SCORE.SYSTEM>
0

>  <SCORE.SYSTEM.CONST>
0

>  <SCORE.SYSTEM.DIHEDRAL>
0

>  <SCORE.SYSTEM.norm>
0

>  <SCORE.heavy>
18

>  <SCORE.norm>
0.255435

>  <TransFSReceptor>
receptor

>  <TransFSScore>
0.001457

$$$$

 OpenBabel01192115203D
libRbt.so/2013.1/901 2013/11/27
 25 27  0  0  0  0  0  0  0  0999 V2000
  197.5197  215.4601  246.3671 C   0  0  0  0  0  0  0  0  0  0  0  0
  197.5771  214.3225  245.4811 O   0  0  0  0  0  0  0  0  0  0  0  0
  198.7300  213.7311  245.8870 C   0  0  0  0  0  0  0  0  0  0  0  0
  199.3223  214.4008  246.9274 C   0  0  0  0  0  0  0  0  0  0  0  0
  198.6127  215.4940  247.3117 O   0  0  0  0  0  0  0  0  0  0  0  0
  200.5042  213.9701  247.4895 C   0  0  0  0  0  0  0  0  0  0  0  0
  201.1133  212.8130  246.9564 C   0  0  0  0  0  0  0  0  0  0  0  0
  200.5098  212.1216  245.8763 C   0  0  0  0  0  0  0  0  0  0  0  0
  199.2903  212.5927  245.3458 C   0  0  0  0  0  0  0  0  0  0  0  0
  201.0748  210.9122  245.2285 C   0  0  0  0  0  0  0  0  0  0  0  0
  200.4380  210.3621  244.2443 N   0  0  0  0  0  0  0  0  0  0  0  0
  201.0209  209.2666  243.6730 N   0  0  0  0  0  0  0  0  0  0  0  0
  200.4897  208.6270  242.5523 C   0  0  0  0  0  0  0  0  0  0  0  0
  201.1504  207.7418  242.0097 O   0  0  0  0  0  0  0  0  0  0  0  0
  199.1930  209.0693  242.0992 C   0  0  0  0  0  0  0  0  0  0  0  0
  198.3966  208.6771  241.0484 C   0  0  0  0  0  0  0  0  0  0  0  0
  197.2618  209.5030  241.0866 C   0  0  0  0  0  0  0  0  0  0  0  0
  197.3011  210.3590  242.1128 N   0  0  0  0  0  0  0  0  0  0  0  0
  198.4700  210.0638  242.7048 N   0  0  0  0  0  0  0  0  0  0  0  0
  198.7052  207.3841  239.7346 Br  0  0  0  0  0  0  0  0  0  0  0  0
  202.3449  212.3459  247.6095 N   0  3  0  0  0  0  0  0  0  0  0  0
  202.8254  213.0595  248.4991 O   0  0  0  0  0  0  0  0  0  0  0  0
  202.8362  211.2710  247.2487 O   0  5  0  0  0  0  0  0  0  0  0  0
  201.9459  208.9601  243.9609 H   0  0  0  0  0  0  0  0  0  0  0  0
  198.7781  210.6069  243.5077 H   0  0  0  0  0  0  0  0  0  0  0  0
  1  5  1  0  0  0  0
  1  2  1  0  0  0  0
  2  3  1  0  0  0  0
  3  9  1  0  0  0  0
  3  4  2  0  0  0  0
  4  5  1  0  0  0  0
  4  6  1  0  0  0  0
  6  7  2  0  0  0  0
  7  8  1  0  0  0  0
  7 21  1  0  0  0  0
  8  9  2  0  0  0  0
  8 10  1  0  0  0  0
 10 11  2  0  0  0  0
 11 12  1  0  0  0  0
 12 13  1  0  0  0  0
 12 24  1  0  0  0  0
 13 14  2  0  0  0  0
 13 15  1  0  0  0  0
 15 19  1  0  0  0  0
 15 16  2  0  0  0  0
 16 17  1  0  0  0  0
 16 20  1  0  0  0  0
 17 18  2  0  0  0  0
 18 19  1  0  0  0  0
 19 25  1  0  0  0  0
 21 22  2  0  0  0  0
 21 23  1  0  0  0  0
M  CHG  2  21   1  23  -1
M  END
>  <CHROM.1>
-179.83889624,-175.81117653,179.45279468,199.61597797,210.77239608,243.86050805
1.38580477,-0.53383670,0.75643446

>  <Name>


>  <RI>
0

>  <Rbt.Current_Directory>
/data/dnb03/galaxy_db/job_working_directory/014/442/14442337/working

>  <Rbt.Executable>
rbdock ($Id: //depot/dev/client3/rdock/2013.1/src/exe/rbdock.cxx#4 $)

>  <Rbt.Library>
libRbt.so (2013.1, Build901 2013/11/27)

>  <Rbt.Parameter_File>
/usr/local/tools/_conda/envs/__rdock@2013.1-0/share/rdock-2013.1-1/data/scripts/dock.prm

>  <Rbt.Receptor>
receptor.prm

>  <SCORE>
5.47985

>  <SCORE.INTER>
8.4

>  <SCORE.INTER.CONST>
1

>  <SCORE.INTER.POLAR>
0

>  <SCORE.INTER.REPUL>
0

>  <SCORE.INTER.ROT>
3

>  <SCORE.INTER.VDW>
0

>  <SCORE.INTER.norm>
0.365217

>  <SCORE.INTRA>
-2.92015

>  <SCORE.INTRA.DIHEDRAL>
-5.53739

>  <SCORE.INTRA.DIHEDRAL.0>
5.58205

>  <SCORE.INTRA.POLAR>
-0.179533

>  <SCORE.INTRA.POLAR.0>
-0.247651

>  <SCORE.INTRA.REPUL>
0

>  <SCORE.INTRA.REPUL.0>
0

>  <SCORE.INTRA.VDW>
0.458955

>  <SCORE.INTRA.VDW.0>
-1.15805

>  <SCORE.INTRA.norm>
-0.126963

>  <SCORE.RESTR>


>  <SCORE.RESTR.norm>
0

>  <SCORE.SYSTEM>
0

>  <SCORE.SYSTEM.CONST>
0

>  <SCORE.SYSTEM.DIHEDRAL>
0

>  <SCORE.SYSTEM.norm>
0

>  <SCORE.heavy>
23

>  <SCORE.norm>
0.238254

>  <TransFSReceptor>
receptor

>  <TransFSScore>
0.000006

$$$$

 OpenBabel01192115203D
libRbt.so/2013.1/901 2013/11/27
 32 34  0  0  0  0  0  0  0  0999 V2000
  225.9288  178.2279  246.5380 C   0  0  0  0  0  0  0  0  0  0  0  0
  225.4926  178.3884  245.1889 O   0  0  0  0  0  0  0  0  0  0  0  0
  225.0600  177.2523  244.5843 C   0  0  0  0  0  0  0  0  0  0  0  0
  224.9981  176.1467  245.0957 O   0  0  0  0  0  0  0  0  0  0  0  0
  224.6366  177.5606  243.1914 C   0  0  0  0  0  0  0  0  0  0  0  0
  224.8243  176.6002  242.1780 C   0  0  0  0  0  0  0  0  0  0  0  0
  224.4889  176.8784  240.8519 C   0  0  0  0  0  0  0  0  0  0  0  0
  223.9651  178.1197  240.5138 C   0  0  0  0  0  0  0  0  0  0  0  0
  223.8017  179.0913  241.4982 C   0  0  0  0  0  0  0  0  0  0  0  0
  224.1394  178.8269  242.8406 C   0  0  0  0  0  0  0  0  0  0  0  0
  223.8975  179.8506  243.7837 N   0  0  0  0  0  0  0  0  0  0  0  0
  223.0786  179.6799  244.8585 C   0  0  0  0  0  0  0  0  0  0  0  0
  222.2116  178.8398  245.0536 O   0  0  0  0  0  0  0  0  0  0  0  0
  223.4759  180.6576  245.9053 C   0  0  0  0  0  0  0  0  0  0  0  0
  224.5209  181.3215  245.4074 C   0  0  0  0  0  0  0  0  0  0  0  0
  224.8416  180.7970  244.0675 C   0  0  0  0  0  0  0  0  0  0  0  0
  225.8431  181.0830  243.4284 O   0  0  0  0  0  0  0  0  0  0  0  0
  225.4872  182.4701  246.1968 Cl  0  0  0  0  0  0  0  0  0  0  0  0
  222.8366  180.6577  247.1346 N   0  0  0  0  0  0  0  0  0  0  0  0
  223.2015  179.7505  248.1665 C   0  0  0  0  0  0  0  0  0  0  0  0
  222.7076  178.4375  248.2349 C   0  0  0  0  0  0  0  0  0  0  0  0
  223.1123  177.5741  249.2553 C   0  0  0  0  0  0  0  0  0  0  0  0
  224.0082  178.0302  250.2220 C   0  0  0  0  0  0  0  0  0  0  0  0
  224.4272  179.3615  250.2321 C   0  0  0  0  0  0  0  0  0  0  0  0
  224.0109  180.2192  249.2105 C   0  0  0  0  0  0  0  0  0  0  0  0
  224.6558  176.8963  251.4129 S   0  0  0  0  0  0  0  0  0  0  0  0
  225.2492  177.6329  252.5032 O   0  0  0  0  0  0  0  0  0  0  0  0
  223.7095  175.8247  251.6182 O   0  0  0  0  0  0  0  0  0  0  0  0
  225.9323  176.2320  250.5469 N   0  0  0  0  0  0  0  0  0  0  0  0
  221.8229  180.5709  246.9943 H   0  0  0  0  0  0  0  0  0  0  0  0
  225.5878  175.7166  249.7374 H   0  0  0  0  0  0  0  0  0  0  0  0
  226.6300  176.9435  250.3319 H   0  0  0  0  0  0  0  0  0  0  0  0
  1  2  1  0  0  0  0
  2  3  1  0  0  0  0
  3  4  2  0  0  0  0
  3  5  1  0  0  0  0
  5 10  1  0  0  0  0
  5  6  2  0  0  0  0
  6  7  1  0  0  0  0
  7  8  2  0  0  0  0
  8  9  1  0  0  0  0
  9 10  2  0  0  0  0
 10 11  1  0  0  0  0
 11 16  1  0  0  0  0
 11 12  1  0  0  0  0
 12 13  2  0  0  0  0
 12 14  1  0  0  0  0
 14 15  2  0  0  0  0
 14 19  1  0  0  0  0
 15 16  1  0  0  0  0
 15 18  1  0  0  0  0
 16 17  2  0  0  0  0
 19 20  1  0  0  0  0
 19 30  1  0  0  0  0
 20 25  1  0  0  0  0
 20 21  2  0  0  0  0
 21 22  1  0  0  0  0
 22 23  2  0  0  0  0
 23 24  1  0  0  0  0
 23 26  1  0  0  0  0
 24 25  2  0  0  0  0
 26 27  2  0  0  0  0
 26 28  2  0  0  0  0
 26 29  1  0  0  0  0
 29 31  1  0  0  0  0
 29 32  1  0  0  0  0
M  END
>  <CHROM.1>
1.19030308,146.49010034,-56.21621118,81.91669212,-83.64172751,-164.48071611
-64.24167459,224.39727427,178.76892918,246.50685499,-0.87103059,1.56706703
-2.08476197

>  <Name>


>  <RI>
0

>  <Rbt.Current_Directory>
/data/dnb03/galaxy_db/job_working_directory/014/442/14442338/working

>  <Rbt.Executable>
rbdock ($Id: //depot/dev/client3/rdock/2013.1/src/exe/rbdock.cxx#4 $)

>  <Rbt.Library>
libRbt.so (2013.1, Build901 2013/11/27)

>  <Rbt.Parameter_File>
/usr/local/tools/_conda/envs/__rdock@2013.1-0/share/rdock-2013.1-1/data/scripts/dock.prm

>  <Rbt.Receptor>
receptor.prm

>  <SCORE>
9.49896

>  <SCORE.INTER>
12.4

>  <SCORE.INTER.CONST>
1

>  <SCORE.INTER.POLAR>
0

>  <SCORE.INTER.REPUL>
0

>  <SCORE.INTER.ROT>
7

>  <SCORE.INTER.VDW>
0

>  <SCORE.INTER.norm>
0.427586

>  <SCORE.INTRA>
-2.90104

>  <SCORE.INTRA.DIHEDRAL>
-0.573274

>  <SCORE.INTRA.DIHEDRAL.0>
6.7925

>  <SCORE.INTRA.POLAR>
0

>  <SCORE.INTRA.POLAR.0>
0

>  <SCORE.INTRA.REPUL>
0

>  <SCORE.INTRA.REPUL.0>
0

>  <SCORE.INTRA.VDW>
-2.61441

>  <SCORE.INTRA.VDW.0>
-2.3423

>  <SCORE.INTRA.norm>
-0.100036

>  <SCORE.RESTR>


>  <SCORE.RESTR.norm>
0

>  <SCORE.SYSTEM>
0

>  <SCORE.SYSTEM.CONST>
0

>  <SCORE.SYSTEM.DIHEDRAL>
0

>  <SCORE.SYSTEM.norm>
0

>  <SCORE.heavy>
29

>  <SCORE.norm>
0.32755

>  <TransFSReceptor>
receptor

>  <TransFSScore>
0.000479

$$$$

 OpenBabel01192115203D
libRbt.so/2013.1/901 2013/11/27
 17 17  0  0  0  0  0  0  0  0999 V2000
  226.8993  195.6974  240.1975 C   0  0  0  0  0  0  0  0  0  0  0  0
  226.2718  194.3631  239.7842 C   0  0  0  0  0  0  0  0  0  0  0  0
  225.6257  193.7106  241.0123 C   0  0  0  0  0  0  0  0  0  0  0  0
  225.2493  194.5348  238.6362 C   0  0  1  0  0  0  0  0  0  0  0  0
  225.9021  194.9799  237.3290 C   0  0  0  0  0  0  0  0  0  0  0  0
  224.6152  193.2578  238.3826 O   0  0  0  0  0  0  0  0  0  0  0  0
  223.4765  193.2843  237.6467 C   0  0  0  0  0  0  0  0  0  0  0  0
  222.9158  194.2829  237.2196 O   0  0  0  0  0  0  0  0  0  0  0  0
  222.9346  191.9125  237.4327 C   0  0  0  0  0  0  0  0  0  0  0  0
  221.7317  191.7882  236.7168 C   0  0  0  0  0  0  0  0  0  0  0  0
  221.1401  190.5358  236.5221 C   0  0  0  0  0  0  0  0  0  0  0  0
  221.7581  189.3949  237.0479 C   0  0  0  0  0  0  0  0  0  0  0  0
  222.9694  189.5014  237.7471 C   0  0  0  0  0  0  0  0  0  0  0  0
  223.5555  190.7604  237.9371 C   0  0  0  0  0  0  0  0  0  0  0  0
  221.1233  188.0803  236.8788 N   0  3  0  0  0  0  0  0  0  0  0  0
  220.0477  188.0343  236.2655 O   0  0  0  0  0  0  0  0  0  0  0  0
  221.6991  187.0966  237.3648 O   0  5  0  0  0  0  0  0  0  0  0  0
  1  2  1  0  0  0  0
  2  3  1  0  0  0  0
  2  4  1  0  0  0  0
  4  5  1  6  0  0  0
  4  6  1  0  0  0  0
  6  7  1  0  0  0  0
  7  8  2  0  0  0  0
  7  9  1  0  0  0  0
  9 14  1  0  0  0  0
  9 10  2  0  0  0  0
 10 11  1  0  0  0  0
 11 12  2  0  0  0  0
 12 13  1  0  0  0  0
 12 15  1  0  0  0  0
 13 14  2  0  0  0  0
 15 16  2  0  0  0  0
 15 17  1  0  0  0  0
M  CHG  2  15   1  17  -1
M  END
>  <CHROM.1>
66.43375841,164.45791826,-2.65899778,178.20130016,223.42106883,191.84117561
237.90396917,-0.65475212,0.77238282,2.77246049

>  <Name>


>  <RI>
0

>  <Rbt.Current_Directory>
/data/dnb03/galaxy_db/job_working_directory/014/442/14442339/working

>  <Rbt.Executable>
rbdock ($Id: //depot/dev/client3/rdock/2013.1/src/exe/rbdock.cxx#4 $)

>  <Rbt.Library>
libRbt.so (2013.1, Build901 2013/11/27)

>  <Rbt.Parameter_File>
/usr/local/tools/_conda/envs/__rdock@2013.1-0/share/rdock-2013.1-1/data/scripts/dock.prm

>  <Rbt.Receptor>
receptor.prm

>  <SCORE>
7.30148

>  <SCORE.INTER>
9.4

>  <SCORE.INTER.CONST>
1

>  <SCORE.INTER.POLAR>
0

>  <SCORE.INTER.REPUL>
0

>  <SCORE.INTER.ROT>
4

>  <SCORE.INTER.VDW>
0

>  <SCORE.INTER.norm>
0.552941

>  <SCORE.INTRA>
-2.09852

>  <SCORE.INTRA.DIHEDRAL>
-5.9264

>  <SCORE.INTRA.DIHEDRAL.0>
7.29427

>  <SCORE.INTRA.POLAR>
0

>  <SCORE.INTRA.POLAR.0>
0

>  <SCORE.INTRA.REPUL>
0

>  <SCORE.INTRA.REPUL.0>
0

>  <SCORE.INTRA.VDW>
0.864679

>  <SCORE.INTRA.VDW.0>
1.29173

>  <SCORE.INTRA.norm>
-0.123442

>  <SCORE.RESTR>


>  <SCORE.RESTR.norm>
0

>  <SCORE.SYSTEM>
0

>  <SCORE.SYSTEM.CONST>
0

>  <SCORE.SYSTEM.DIHEDRAL>
0

>  <SCORE.SYSTEM.norm>
0

>  <SCORE.heavy>
17

>  <SCORE.norm>
0.429499

>  <TransFSReceptor>
receptor

>  <TransFSScore>
0.007042

$$$$

 OpenBabel01192115203D
libRbt.so/2013.1/901 2013/11/27
 21 22  0  0  0  0  0  0  0  0999 V2000
  199.0904  223.2796  248.7021 C   0  0  0  0  0  0  0  0  0  0  0  0
  198.4926  223.2665  249.9928 O   0  0  0  0  0  0  0  0  0  0  0  0
  199.2920  223.5886  251.0537 C   0  0  0  0  0  0  0  0  0  0  0  0
  198.8669  223.0893  252.2851 C   0  0  0  0  0  0  0  0  0  0  0  0
  199.5868  223.3602  253.4484 C   0  0  0  0  0  0  0  0  0  0  0  0
  200.7391  224.1425  253.3890 C   0  0  0  0  0  0  0  0  0  0  0  0
  201.1816  224.6498  252.1610 C   0  0  0  0  0  0  0  0  0  0  0  0
  200.4517  224.3631  250.9945 C   0  0  0  0  0  0  0  0  0  0  0  0
  202.3955  225.5371  252.0879 C   0  0  0  0  0  0  0  0  0  0  0  0
  201.9861  226.9782  251.7882 C   0  0  0  0  0  0  0  0  0  0  0  0
  201.1849  227.5266  252.9236 N   0  3  0  0  0  0  0  0  0  0  0  0
  200.8635  226.7676  253.5382 H   0  0  0  0  0  0  0  0  0  0  0  0
  201.7745  228.1376  253.5098 H   0  0  0  0  0  0  0  0  0  0  0  0
  199.9976  228.3272  252.4948 C   0  0  0  0  0  0  0  0  0  0  0  0
  198.9565  227.4841  251.8267 C   0  0  0  0  0  0  0  0  0  0  0  0
  198.7500  227.5372  250.4421 C   0  0  0  0  0  0  0  0  0  0  0  0
  197.7588  226.7484  249.8519 C   0  0  0  0  0  0  0  0  0  0  0  0
  196.9665  225.9067  250.6343 C   0  0  0  0  0  0  0  0  0  0  0  0
  197.1617  225.8494  252.0123 C   0  0  0  0  0  0  0  0  0  0  0  0
  198.1494  226.6365  252.5917 C   0  0  0  0  0  0  0  0  0  0  0  0
  198.3620  226.5636  253.9146 F   0  0  0  0  0  0  0  0  0  0  0  0
  1  2  1  0  0  0  0
  2  3  1  0  0  0  0
  3  8  1  0  0  0  0
  3  4  2  0  0  0  0
  4  5  1  0  0  0  0
  5  6  2  0  0  0  0
  6  7  1  0  0  0  0
  7  8  2  0  0  0  0
  7  9  1  0  0  0  0
  9 10  1  0  0  0  0
 10 11  1  0  0  0  0
 11 12  1  0  0  0  0
 11 13  1  0  0  0  0
 11 14  1  0  0  0  0
 14 15  1  0  0  0  0
 15 20  1  0  0  0  0
 15 16  2  0  0  0  0
 16 17  1  0  0  0  0
 17 18  2  0  0  0  0
 18 19  1  0  0  0  0
 19 20  2  0  0  0  0
 20 21  1  0  0  0  0
M  CHG  1  11   1
M  END
>  <CHROM.1>
-156.47004022,-108.11864755,65.00968112,-15.21497676,67.32767319,-106.41619121
199.44751174,225.53662805,251.74330811,-1.97962046,-0.51183892,0.33831636

>  <Name>


>  <RI>
0

>  <Rbt.Current_Directory>
/data/dnb03/galaxy_db/job_working_directory/014/442/14442340/working

>  <Rbt.Executable>
rbdock ($Id: //depot/dev/client3/rdock/2013.1/src/exe/rbdock.cxx#4 $)

>  <Rbt.Library>
libRbt.so (2013.1, Build901 2013/11/27)

>  <Rbt.Parameter_File>
/usr/local/tools/_conda/envs/__rdock@2013.1-0/share/rdock-2013.1-1/data/scripts/dock.prm

>  <Rbt.Receptor>
receptor.prm

>  <SCORE>
8.75977

>  <SCORE.INTER>
11.4

>  <SCORE.INTER.CONST>
1

>  <SCORE.INTER.POLAR>
0

>  <SCORE.INTER.REPUL>
0

>  <SCORE.INTER.ROT>
6

>  <SCORE.INTER.VDW>
0

>  <SCORE.INTER.norm>
0.6

>  <SCORE.INTRA>
-2.64023

>  <SCORE.INTRA.DIHEDRAL>
3.84993

>  <SCORE.INTRA.DIHEDRAL.0>
1.52601

>  <SCORE.INTRA.POLAR>
0

>  <SCORE.INTRA.POLAR.0>
0

>  <SCORE.INTRA.REPUL>
0

>  <SCORE.INTRA.REPUL.0>
0

>  <SCORE.INTRA.VDW>
-4.56519

>  <SCORE.INTRA.VDW.0>
1.10878

>  <SCORE.INTRA.norm>
-0.138959

>  <SCORE.RESTR>


>  <SCORE.RESTR.norm>
0

>  <SCORE.SYSTEM>
0

>  <SCORE.SYSTEM.CONST>
0

>  <SCORE.SYSTEM.DIHEDRAL>
0

>  <SCORE.SYSTEM.norm>
0

>  <SCORE.heavy>
19

>  <SCORE.norm>
0.461041

>  <TransFSReceptor>
receptor

>  <TransFSScore>
0.000182

$$$$

 OpenBabel01192115203D
libRbt.so/2013.1/901 2013/11/27
 54 55  0  0  0  0  0  0  0  0999 V2000
  230.0498  178.2532  250.1564 C   0  0  0  0  0  0  0  0  0  0  0  0
  229.2500  177.1703  250.8574 C   0  0  0  0  0  0  0  0  0  0  0  0
  227.8568  177.0508  250.2503 C   0  0  0  0  0  0  0  0  0  0  0  0
  227.0700  175.9255  250.9119 C   0  0  0  0  0  0  0  0  0  0  0  0
  225.6379  175.9004  250.3856 C   0  0  0  0  0  0  0  0  0  0  0  0
  224.8498  174.8226  251.0520 C   0  0  0  0  0  0  0  0  0  0  0  0
  223.7314  175.0687  251.7491 C   0  0  0  0  0  0  0  0  0  0  0  0
  222.9490  173.9855  252.4187 C   0  0  0  0  0  0  0  0  0  0  0  0
  221.5535  173.8798  251.8182 C   0  0  0  0  0  0  0  0  0  0  0  0
  220.7990  172.7260  252.4684 C   0  0  0  0  0  0  0  0  0  0  0  0
  219.5050  172.4990  251.7560 C   0  0  0  0  0  0  0  0  0  0  0  0
  218.3251  172.5654  252.3862 C   0  0  0  0  0  0  0  0  0  0  0  0
  217.0407  172.3413  251.6777 C   0  0  0  0  0  0  0  0  0  0  0  0
  216.2134  173.6223  251.6111 C   0  0  0  0  0  0  0  0  0  0  0  0
  214.9207  173.3810  250.8353 C   0  0  0  0  0  0  0  0  0  0  0  0
  214.1193  174.6804  250.6853 C   0  0  0  0  0  0  0  0  0  0  0  0
  212.8935  174.4826  249.8123 C   0  0  0  0  0  0  0  0  0  0  0  0
  212.1802  175.7773  249.5244 C   0  0  0  0  0  0  0  0  0  0  0  0
  212.8563  176.7955  248.8954 O   0  0  0  0  0  0  0  0  0  0  0  0
  213.6378  176.6281  247.4875 P   0  0  1  0  0  0  0  0  0  0  0  0
  212.7174  176.6375  246.2677 O   0  0  0  0  0  0  0  0  0  0  0  0
  214.0321  178.1619  247.8240 O   0  0  0  0  0  0  0  0  0  0  0  0
  215.1259  176.2373  247.1975 O   0  0  0  0  0  0  0  0  0  0  0  0
  215.4512  174.7630  247.1878 C   0  0  0  0  0  0  0  0  0  0  0  0
  216.9601  174.8207  246.8494 C   0  0  0  0  0  0  0  0  0  0  0  0
  217.7042  173.5235  246.9934 C   0  0  0  0  0  0  0  0  0  0  0  0
  218.7323  173.3917  247.8547 C   0  0  0  0  0  0  0  0  0  0  0  0
  219.1177  174.5695  248.7116 C   0  0  0  0  0  0  0  0  0  0  0  0
  220.4118  175.1164  248.6618 C   0  0  0  0  0  0  0  0  0  0  0  0
  220.8440  176.1350  249.5486 C   0  0  0  0  0  0  0  0  0  0  0  0
  219.9124  176.6700  250.4509 C   0  0  0  0  0  0  0  0  0  0  0  0
  218.5862  176.1745  250.4411 C   0  0  0  0  0  0  0  0  0  0  0  0
  218.1976  175.1325  249.5935 C   0  0  0  0  0  0  0  0  0  0  0  0
  217.3667  176.8404  251.4782 Cl  0  0  0  0  0  0  0  0  0  0  0  0
  220.2145  177.6408  251.3724 O   0  0  0  0  0  0  0  0  0  0  0  0
  222.2775  176.5347  249.3756 C   0  0  0  0  0  0  0  0  0  0  0  0
  222.9913  175.9488  248.5714 O   0  0  0  0  0  0  0  0  0  0  0  0
  222.7778  177.5282  250.1392 O   0  0  0  0  0  0  0  0  0  0  0  0
  219.3827  172.0530  247.9954 C   0  0  0  0  0  0  0  0  0  0  0  0
  219.0336  170.9032  247.2574 C   0  0  0  0  0  0  0  0  0  0  0  0
  219.7330  169.6735  247.3780 C   0  0  0  0  0  0  0  0  0  0  0  0
  220.8170  169.6069  248.2633 C   0  0  0  0  0  0  0  0  0  0  0  0
  221.1606  170.7488  249.0121 C   0  0  0  0  0  0  0  0  0  0  0  0
  220.4496  171.9405  248.8876 C   0  0  0  0  0  0  0  0  0  0  0  0
  222.5142  170.7642  250.0895 Cl  0  0  0  0  0  0  0  0  0  0  0  0
  221.5685  168.4785  248.4630 O   0  0  0  0  0  0  0  0  0  0  0  0
  219.2938  168.5910  246.4425 C   0  0  0  0  0  0  0  0  0  0  0  0
  218.4438  168.8246  245.5940 O   0  0  0  0  0  0  0  0  0  0  0  0
  219.8596  167.3687  246.5312 O   0  0  0  0  0  0  0  0  0  0  0  0
  213.2786  178.6582  248.0134 H   0  0  0  0  0  0  0  0  0  0  0  0
  219.6231  177.5979  252.1402 H   0  0  0  0  0  0  0  0  0  0  0  0
  222.2007  177.9691  250.7879 H   0  0  0  0  0  0  0  0  0  0  0  0
  221.2965  167.7658  247.8625 H   0  0  0  0  0  0  0  0  0  0  0  0
  219.5753  166.6598  245.9230 H   0  0  0  0  0  0  0  0  0  0  0  0
  1  2  1  0  0  0  0
  2  3  1  0  0  0  0
  3  4  1  0  0  0  0
  4  5  1  0  0  0  0
  5  6  1  0  0  0  0
  6  7  2  0  0  0  0
  7  8  1  0  0  0  0
  8  9  1  0  0  0  0
  9 10  1  0  0  0  0
 10 11  1  0  0  0  0
 11 12  2  0  0  0  0
 12 13  1  0  0  0  0
 13 14  1  0  0  0  0
 14 15  1  0  0  0  0
 15 16  1  0  0  0  0
 16 17  1  0  0  0  0
 17 18  1  0  0  0  0
 18 19  1  0  0  0  0
 19 20  1  0  0  0  0
 20 21  2  6  0  0  0
 20 22  1  0  0  0  0
 20 23  1  0  0  0  0
 22 50  1  0  0  0  0
 23 24  1  0  0  0  0
 24 25  1  0  0  0  0
 25 26  1  0  0  0  0
 26 27  2  0  0  0  0
 27 28  1  0  0  0  0
 27 39  1  0  0  0  0
 28 33  1  0  0  0  0
 28 29  2  0  0  0  0
 29 30  1  0  0  0  0
 30 31  2  0  0  0  0
 30 36  1  0  0  0  0
 31 32  1  0  0  0  0
 31 35  1  0  0  0  0
 32 33  2  0  0  0  0
 32 34  1  0  0  0  0
 35 51  1  0  0  0  0
 36 37  2  0  0  0  0
 36 38  1  0  0  0  0
 38 52  1  0  0  0  0
 39 44  1  0  0  0  0
 39 40  2  0  0  0  0
 40 41  1  0  0  0  0
 41 42  2  0  0  0  0
 41 47  1  0  0  0  0
 42 43  1  0  0  0  0
 42 46  1  0  0  0  0
 43 44  2  0  0  0  0
 43 45  1  0  0  0  0
 46 53  1  0  0  0  0
 47 48  2  0  0  0  0
 47 49  1  0  0  0  0
 49 54  1  0  0  0  0
M  END
>  <CHROM.1>
177.63410907,174.81279391,-178.62455603,121.35418281,-116.89321328,177.24261715
-172.26012131,-121.69345526,-112.78294536,177.97175752,-176.49839249,174.97044532
-173.49739109,58.78708584,53.86897671,78.49284872,-51.72015088,83.28023048
179.01056208,169.45957974,-119.21363443,-121.49868046,2.21583875,-3.70185212
-153.69254289,-0.06721118,4.29114557,4.61230537,179.96603421,219.44796420
174.21483628,249.42650850,0.03521267,-0.16952323,0.26848091

>  <Name>


>  <RI>
0

>  <Rbt.Current_Directory>
/data/dnb03/galaxy_db/job_working_directory/014/442/14442341/working

>  <Rbt.Executable>
rbdock ($Id: //depot/dev/client3/rdock/2013.1/src/exe/rbdock.cxx#4 $)

>  <Rbt.Library>
libRbt.so (2013.1, Build901 2013/11/27)

>  <Rbt.Parameter_File>
/usr/local/tools/_conda/envs/__rdock@2013.1-0/share/rdock-2013.1-1/data/scripts/dock.prm

>  <Rbt.Receptor>
receptor.prm

>  <SCORE>
-5.93094

>  <SCORE.INTER>
29.4

>  <SCORE.INTER.CONST>
1

>  <SCORE.INTER.POLAR>
0

>  <SCORE.INTER.REPUL>
0

>  <SCORE.INTER.ROT>
24

>  <SCORE.INTER.VDW>
0

>  <SCORE.INTER.norm>
0.6

>  <SCORE.INTRA>
-35.3309

>  <SCORE.INTRA.DIHEDRAL>
-35.7087

>  <SCORE.INTRA.DIHEDRAL.0>
49.5555

>  <SCORE.INTRA.POLAR>
-1.43923

>  <SCORE.INTRA.POLAR.0>
0

>  <SCORE.INTRA.REPUL>
0

>  <SCORE.INTRA.REPUL.0>
0

>  <SCORE.INTRA.VDW>
-12.5832

>  <SCORE.INTRA.VDW.0>
0.0173908

>  <SCORE.INTRA.norm>
-0.72104

>  <SCORE.RESTR>


>  <SCORE.RESTR.norm>
0

>  <SCORE.SYSTEM>
0

>  <SCORE.SYSTEM.CONST>
0

>  <SCORE.SYSTEM.DIHEDRAL>
0

>  <SCORE.SYSTEM.norm>
0

>  <SCORE.heavy>
49

>  <SCORE.norm>
-0.12104

>  <TransFSReceptor>
receptor

>  <TransFSScore>
0.250880

$$$$

 OpenBabel01192115203D
libRbt.so/2013.1/901 2013/11/27
 40 46  0  0  0  0  0  0  0  0999 V2000
  194.1230  213.7315  252.3287 C   0  0  0  0  0  0  0  0  0  0  0  0
  194.3012  212.6968  251.2590 C   0  0  0  0  0  0  0  0  0  0  0  0
  193.3196  211.7202  251.0923 C   0  0  0  0  0  0  0  0  0  0  0  0
  193.6449  210.5302  250.4738 C   0  0  0  0  0  0  0  0  0  0  0  0
  194.9942  210.3171  250.1724 C   0  0  0  0  0  0  0  0  0  0  0  0
  195.8557  211.3953  249.9720 C   0  0  0  0  0  0  0  0  0  0  0  0
  195.5187  212.5924  250.5792 C   0  0  0  0  0  0  0  0  0  0  0  0
  195.5773  209.0786  250.5816 N   0  0  0  0  0  0  0  0  0  0  0  0
  195.0556  208.4795  251.7554 C   0  0  0  0  0  0  0  0  0  0  0  0
  194.3960  208.9978  252.6707 O   0  0  0  0  0  0  0  0  0  0  0  0
  195.3665  207.0531  251.8515 C   0  0  0  0  0  0  0  0  0  0  0  0
  194.2556  206.1864  251.9256 C   0  0  0  0  0  0  0  0  0  0  0  0
  194.3436  204.9812  251.2687 C   0  0  0  0  0  0  0  0  0  0  0  0
  195.5189  204.6321  250.6028 C   0  0  0  0  0  0  0  0  0  0  0  0
  196.6670  205.4538  250.6685 C   0  0  0  0  0  0  0  0  0  0  0  0
  196.6132  206.6808  251.3330 C   0  0  0  0  0  0  0  0  0  0  0  0
  197.5238  207.8008  251.0081 C   0  0  0  0  0  0  0  0  0  0  0  0
  198.6306  208.2708  251.6366 C   0  0  0  0  0  0  0  0  0  0  0  0
  199.3097  209.4865  251.4889 N   0  0  0  0  0  0  0  0  0  0  0  0
  200.4864  209.8297  250.8549 C   0  0  0  0  0  0  0  0  0  0  0  0
  201.2895  209.1960  249.8785 C   0  0  0  0  0  0  0  0  0  0  0  0
  202.8075  209.3702  249.4467 C   0  0  0  0  0  0  0  0  0  0  0  0
  203.7408  210.0785  250.2192 C   0  0  0  0  0  0  0  0  0  0  0  0
  204.7992  210.7727  249.5911 C   0  0  0  0  0  0  0  0  0  0  0  0
  205.0036  210.6959  248.2113 C   0  0  0  0  0  0  0  0  0  0  0  0
  204.1532  209.9197  247.4382 C   0  0  0  0  0  0  0  0  0  0  0  0
  203.0448  209.3054  248.0303 C   0  0  0  0  0  0  0  0  0  0  0  0
  202.0297  208.8684  247.1536 N   0  0  0  0  0  0  0  0  0  0  0  0
  200.8180  209.1512  247.5411 C   0  0  0  0  0  0  0  0  0  0  0  0
  200.5563  209.7844  248.7819 N   0  0  0  0  0  0  0  0  0  0  0  0
  200.8021  211.1810  249.1339 C   0  0  0  0  0  0  0  0  0  0  0  0
  201.3318  212.2708  248.4175 C   0  0  0  0  0  0  0  0  0  0  0  0
  201.9497  213.2849  249.1778 C   0  0  0  0  0  0  0  0  0  0  0  0
  201.9346  213.2826  250.5782 C   0  0  0  0  0  0  0  0  0  0  0  0
  201.2842  212.2678  251.2856 C   0  0  0  0  0  0  0  0  0  0  0  0
  200.7836  211.1787  250.5493 C   0  0  0  0  0  0  0  0  0  0  0  0
  199.6475  208.4916  246.9028 C   0  0  0  0  0  0  0  0  0  0  0  0
  196.8341  208.7209  250.0669 C   0  0  0  0  0  0  0  0  0  0  0  0
  197.3290  209.0204  248.9865 O   0  0  0  0  0  0  0  0  0  0  0  0
  198.8500  210.2476  251.9927 H   0  0  0  0  0  0  0  0  0  0  0  0
  1  2  1  0  0  0  0
  2  7  1  0  0  0  0
  2  3  2  0  0  0  0
  3  4  1  0  0  0  0
  4  5  2  0  0  0  0
  5  6  1  0  0  0  0
  5  8  1  0  0  0  0
  6  7  2  0  0  0  0
  8 38  1  0  0  0  0
  8  9  1  0  0  0  0
  9 10  2  0  0  0  0
  9 11  1  0  0  0  0
 11 16  1  0  0  0  0
 11 12  2  0  0  0  0
 12 13  1  0  0  0  0
 13 14  2  0  0  0  0
 14 15  1  0  0  0  0
 15 16  2  0  0  0  0
 16 17  1  0  0  0  0
 17 18  2  0  0  0  0
 17 38  1  0  0  0  0
 18 19  1  0  0  0  0
 19 20  1  0  0  0  0
 19 40  1  0  0  0  0
 20 36  1  0  0  0  0
 20 21  2  0  0  0  0
 21 30  1  0  0  0  0
 21 22  1  0  0  0  0
 22 27  1  0  0  0  0
 22 23  2  0  0  0  0
 23 24  1  0  0  0  0
 24 25  2  0  0  0  0
 25 26  1  0  0  0  0
 26 27  2  0  0  0  0
 27 28  1  0  0  0  0
 28 29  2  0  0  0  0
 29 30  1  0  0  0  0
 29 37  1  0  0  0  0
 30 31  1  0  0  0  0
 31 36  1  0  0  0  0
 31 32  2  0  0  0  0
 32 33  1  0  0  0  0
 33 34  2  0  0  0  0
 34 35  1  0  0  0  0
 35 36  2  0  0  0  0
 38 39  2  0  0  0  0
M  END
>  <CHROM.1>
-30.62832812,17.11861416,198.56630906,209.67116407,250.12682673,2.95185413
-0.30397076,-3.06581793

>  <Name>


>  <RI>
0

>  <Rbt.Current_Directory>
/data/dnb03/galaxy_db/job_working_directory/014/442/14442342/working

>  <Rbt.Executable>
rbdock ($Id: //depot/dev/client3/rdock/2013.1/src/exe/rbdock.cxx#4 $)

>  <Rbt.Library>
libRbt.so (2013.1, Build901 2013/11/27)

>  <Rbt.Parameter_File>
/usr/local/tools/_conda/envs/__rdock@2013.1-0/share/rdock-2013.1-1/data/scripts/dock.prm

>  <Rbt.Receptor>
receptor.prm

>  <SCORE>
7.30403

>  <SCORE.INTER>
7.4

>  <SCORE.INTER.CONST>
1

>  <SCORE.INTER.POLAR>
0

>  <SCORE.INTER.REPUL>
0

>  <SCORE.INTER.ROT>
2

>  <SCORE.INTER.VDW>
0

>  <SCORE.INTER.norm>
0.189744

>  <SCORE.INTRA>
-0.0959698

>  <SCORE.INTRA.DIHEDRAL>
0.0142785

>  <SCORE.INTRA.DIHEDRAL.0>
12.4753

>  <SCORE.INTRA.POLAR>
0

>  <SCORE.INTRA.POLAR.0>
0

>  <SCORE.INTRA.REPUL>
0.00600069

>  <SCORE.INTRA.REPUL.0>
0

>  <SCORE.INTRA.VDW>
-0.133113

>  <SCORE.INTRA.VDW.0>
-1.17285

>  <SCORE.INTRA.norm>
-0.00246076

>  <SCORE.RESTR>


>  <SCORE.RESTR.norm>
0

>  <SCORE.SYSTEM>
0

>  <SCORE.SYSTEM.CONST>
0

>  <SCORE.SYSTEM.DIHEDRAL>
0

>  <SCORE.SYSTEM.norm>
0

>  <SCORE.heavy>
39

>  <SCORE.norm>
0.187283

>  <TransFSReceptor>
receptor

>  <TransFSScore>
0.000065

$$$$

 OpenBabel01192115203D
libRbt.so/2013.1/901 2013/11/27
 24 27  0  0  0  0  0  0  0  0999 V2000
  188.6931  218.1715  268.3508 C   0  0  0  0  0  0  0  0  0  0  0  0
  187.5685  218.1385  269.1707 C   0  0  0  0  0  0  0  0  0  0  0  0
  186.3242  217.8226  268.6281 C   0  0  0  0  0  0  0  0  0  0  0  0
  186.1908  217.5353  267.2605 C   0  0  0  0  0  0  0  0  0  0  0  0
  184.9399  217.2362  266.7055 C   0  0  0  0  0  0  0  0  0  0  0  0
  184.7989  216.9595  265.3367 C   0  0  0  0  0  0  0  0  0  0  0  0
  185.9208  216.9792  264.5075 C   0  0  0  0  0  0  0  0  0  0  0  0
  187.1773  217.2792  265.0523 C   0  0  0  0  0  0  0  0  0  0  0  0
  187.3281  217.5624  266.4242 C   0  0  0  0  0  0  0  0  0  0  0  0
  188.5750  217.8862  266.9881 C   0  0  0  0  0  0  0  0  0  0  0  0
  183.4168  216.7516  264.8263 C   0  0  0  0  0  0  0  0  0  0  0  0
  182.5141  216.7884  265.6587 O   0  0  0  0  0  0  0  0  0  0  0  0
  183.2863  216.4789  263.4828 N   0  0  0  0  0  0  0  0  0  0  0  0
  182.0915  216.2142  262.8454 C   0  0  0  0  0  0  0  0  0  0  0  0
  180.9354  216.2986  263.4638 N   0  0  0  0  0  0  0  0  0  0  0  0
  179.9051  216.0492  262.5638 C   0  0  0  0  0  0  0  0  0  0  0  0
  180.3130  215.7059  261.2721 C   0  0  0  0  0  0  0  0  0  0  0  0
  182.0256  215.7055  261.2194 S   0  0  0  0  0  0  0  0  0  0  0  0
  179.4007  215.4272  260.2429 C   0  0  0  0  0  0  0  0  0  0  0  0
  178.0451  215.5138  260.5428 C   0  0  0  0  0  0  0  0  0  0  0  0
  177.5987  215.8539  261.8122 C   0  0  0  0  0  0  0  0  0  0  0  0
  178.5202  216.1178  262.8335 C   0  0  0  0  0  0  0  0  0  0  0  0
  177.1486  215.2658  259.5786 F   0  0  0  0  0  0  0  0  0  0  0  0
  184.1016  216.2656  262.9249 H   0  0  0  0  0  0  0  0  0  0  0  0
  1 10  1  0  0  0  0
  1  2  2  0  0  0  0
  2  3  1  0  0  0  0
  3  4  2  0  0  0  0
  4  9  1  0  0  0  0
  4  5  1  0  0  0  0
  5  6  2  0  0  0  0
  6  7  1  0  0  0  0
  6 11  1  0  0  0  0
  7  8  2  0  0  0  0
  8  9  1  0  0  0  0
  9 10  2  0  0  0  0
 11 12  2  0  0  0  0
 11 13  1  0  0  0  0
 13 14  1  0  0  0  0
 13 24  1  0  0  0  0
 14 18  1  0  0  0  0
 14 15  2  0  0  0  0
 15 16  1  0  0  0  0
 16 22  1  0  0  0  0
 16 17  2  0  0  0  0
 17 18  1  0  0  0  0
 17 19  1  0  0  0  0
 19 20  2  0  0  0  0
 20 21  1  0  0  0  0
 20 23  1  0  0  0  0
 21 22  2  0  0  0  0
M  END
>  <CHROM.1>
-2.73640552,5.24615130,182.98353101,216.60181382,264.03868329,-0.67550464
-0.06871192,-1.80276846

>  <Name>


>  <RI>
0

>  <Rbt.Current_Directory>
/data/dnb03/galaxy_db/job_working_directory/014/442/14442343/working

>  <Rbt.Executable>
rbdock ($Id: //depot/dev/client3/rdock/2013.1/src/exe/rbdock.cxx#4 $)

>  <Rbt.Library>
libRbt.so (2013.1, Build901 2013/11/27)

>  <Rbt.Parameter_File>
/usr/local/tools/_conda/envs/__rdock@2013.1-0/share/rdock-2013.1-1/data/scripts/dock.prm

>  <Rbt.Receptor>
receptor.prm

>  <SCORE>
4.90258

>  <SCORE.INTER>
7.4

>  <SCORE.INTER.CONST>
1

>  <SCORE.INTER.POLAR>
0

>  <SCORE.INTER.REPUL>
0

>  <SCORE.INTER.ROT>
2

>  <SCORE.INTER.VDW>
0

>  <SCORE.INTER.norm>
0.321739

>  <SCORE.INTRA>
-2.49742

>  <SCORE.INTRA.DIHEDRAL>
-5.57686

>  <SCORE.INTRA.DIHEDRAL.0>
6.22885

>  <SCORE.INTRA.POLAR>
0

>  <SCORE.INTRA.POLAR.0>
0

>  <SCORE.INTRA.REPUL>
0

>  <SCORE.INTRA.REPUL.0>
0

>  <SCORE.INTRA.VDW>
0.291012

>  <SCORE.INTRA.VDW.0>
-0.264764

>  <SCORE.INTRA.norm>
-0.108583

>  <SCORE.RESTR>


>  <SCORE.RESTR.norm>
0

>  <SCORE.SYSTEM>
0

>  <SCORE.SYSTEM.CONST>
0

>  <SCORE.SYSTEM.DIHEDRAL>
0

>  <SCORE.SYSTEM.norm>
0

>  <SCORE.heavy>
23

>  <SCORE.norm>
0.213156

>  <TransFSReceptor>
receptor

>  <TransFSScore>
0.007771

$$$$

 OpenBabel01192115203D
libRbt.so/2013.1/901 2013/11/27
 46 49  0  0  0  0  0  0  0  0999 V2000
  197.6826  216.3908  251.0829 C   0  0  0  0  0  0  0  0  0  0  0  0
  198.4975  215.4087  251.8337 C   0  0  0  0  0  0  0  0  0  0  0  0
  198.0920  214.4486  252.6679 C   0  0  0  0  0  0  0  0  0  0  0  0
  199.2693  213.6520  253.0416 C   0  0  0  0  0  0  0  0  0  0  0  0
  199.2114  212.7374  253.8477 O   0  0  0  0  0  0  0  0  0  0  0  0
  200.3397  214.1579  252.3596 N   0  0  0  0  0  0  0  0  0  0  0  0
  199.9579  215.2870  251.6859 C   0  0  0  0  0  0  0  0  0  0  0  0
  200.6139  216.0710  251.0215 O   0  0  0  0  0  0  0  0  0  0  0  0
  201.6368  213.5862  252.3546 C   0  0  0  0  0  0  0  0  0  0  0  0
  202.7428  214.2828  251.8490 C   0  0  0  0  0  0  0  0  0  0  0  0
  204.0322  213.7139  251.8354 C   0  0  0  0  0  0  0  0  0  0  0  0
  204.2049  212.4027  252.3000 C   0  0  0  0  0  0  0  0  0  0  0  0
  203.1082  211.6904  252.7931 C   0  0  0  0  0  0  0  0  0  0  0  0
  201.8448  212.2838  252.8318 C   0  0  0  0  0  0  0  0  0  0  0  0
  205.4954  211.7674  252.2902 C   0  0  0  0  0  0  0  0  0  0  0  0
  206.5201  211.2438  252.2821 N   0  0  0  0  0  0  0  0  0  0  0  0
  205.2068  214.5244  251.3430 C   0  0  0  0  0  0  0  0  0  0  0  0
  204.8447  215.6625  250.6899 F   0  0  0  0  0  0  0  0  0  0  0  0
  206.0158  214.9266  252.3593 F   0  0  0  0  0  0  0  0  0  0  0  0
  205.9890  213.8316  250.4747 F   0  0  0  0  0  0  0  0  0  0  0  0
  196.7208  214.0863  253.1052 C   0  0  0  0  0  0  0  0  0  0  0  0
  195.9416  213.3290  252.0279 C   0  0  0  0  0  0  0  0  0  0  0  0
  196.5083  211.9248  251.8785 C   0  0  0  0  0  0  0  0  0  0  0  0
  197.8280  211.8982  251.1065 C   0  0  0  0  0  0  0  0  0  0  0  0
  198.3739  210.4761  251.1694 C   0  0  0  0  0  0  0  0  0  0  0  0
  199.7933  210.2841  250.6491 C   0  0  0  0  0  0  0  0  0  0  0  0
  200.0643  210.6182  249.2427 N   0  0  0  0  0  0  0  0  0  0  0  0
  200.0413  212.0616  248.9101 C   0  0  0  0  0  0  0  0  0  0  0  0
  201.2834  212.9184  249.2986 C   0  0  0  0  0  0  0  0  0  0  0  0
  202.5623  212.2036  249.1311 N   0  0  0  0  0  0  0  0  0  0  0  0
  202.5497  210.8129  249.5693 C   0  0  0  0  0  0  0  0  0  0  0  0
  201.3967  210.0819  248.8625 C   0  0  0  0  0  0  0  0  0  0  0  0
  203.7771  212.7333  248.7265 C   0  0  0  0  0  0  0  0  0  0  0  0
  204.8241  212.0818  248.8068 O   0  0  0  0  0  0  0  0  0  0  0  0
  203.8138  214.1225  248.1099 C   0  0  0  0  0  0  0  0  0  0  0  0
  203.6778  214.0036  246.7051 O   0  0  0  0  0  0  0  0  0  0  0  0
  202.5006  213.4639  246.2734 C   0  0  0  0  0  0  0  0  0  0  0  0
  202.5860  212.1299  245.8989 C   0  0  0  0  0  0  0  0  0  0  0  0
  201.4654  211.4563  245.4117 C   0  0  0  0  0  0  0  0  0  0  0  0
  200.2156  212.0883  245.3057 C   0  0  0  0  0  0  0  0  0  0  0  0
  200.1426  213.4332  245.7164 C   0  0  0  0  0  0  0  0  0  0  0  0
  201.2708  214.1136  246.2005 C   0  0  0  0  0  0  0  0  0  0  0  0
  198.9682  211.3446  244.7962 C   0  0  0  0  0  0  0  0  0  0  0  0
  199.3031  209.9711  244.1694 C   0  0  0  0  0  0  0  0  0  0  0  0
  197.9948  211.0924  245.9668 C   0  0  0  0  0  0  0  0  0  0  0  0
  198.2418  212.1712  243.7143 C   0  0  0  0  0  0  0  0  0  0  0  0
  1  2  1  0  0  0  0
  2  7  1  0  0  0  0
  2  3  2  0  0  0  0
  3  4  1  0  0  0  0
  3 21  1  0  0  0  0
  4  5  2  0  0  0  0
  4  6  1  0  0  0  0
  6  7  1  0  0  0  0
  6  9  1  0  0  0  0
  7  8  2  0  0  0  0
  9 14  1  0  0  0  0
  9 10  2  0  0  0  0
 10 11  1  0  0  0  0
 11 12  2  0  0  0  0
 11 17  1  0  0  0  0
 12 13  1  0  0  0  0
 12 15  1  0  0  0  0
 13 14  2  0  0  0  0
 15 16  3  0  0  0  0
 17 18  1  0  0  0  0
 17 19  1  0  0  0  0
 17 20  1  0  0  0  0
 21 22  1  0  0  0  0
 22 23  1  0  0  0  0
 23 24  1  0  0  0  0
 24 25  1  0  0  0  0
 25 26  1  0  0  0  0
 26 27  1  0  0  0  0
 27 32  1  0  0  0  0
 27 28  1  0  0  0  0
 28 29  1  0  0  0  0
 29 30  1  0  0  0  0
 30 31  1  0  0  0  0
 30 33  1  0  0  0  0
 31 32  1  0  0  0  0
 33 34  2  0  0  0  0
 33 35  1  0  0  0  0
 35 36  1  0  0  0  0
 36 37  1  0  0  0  0
 37 42  1  0  0  0  0
 37 38  2  0  0  0  0
 38 39  1  0  0  0  0
 39 40  2  0  0  0  0
 40 41  1  0  0  0  0
 40 43  1  0  0  0  0
 41 42  2  0  0  0  0
 43 44  1  0  0  0  0
 43 45  1  0  0  0  0
 43 46  1  0  0  0  0
M  END
>  <CHROM.1>
75.70845841,-167.69807522,-13.04450686,71.43940114,-76.31021999,173.30574368
-170.63901851,-60.54908594,70.63446778,-91.06265066,62.63778760,-101.58684917
-11.42396155,201.31118475,212.92247896,249.82300087,2.28921178,-0.07165097
-1.83709505

>  <Name>


>  <RI>
0

>  <Rbt.Current_Directory>
/data/dnb03/galaxy_db/job_working_directory/014/442/14442344/working

>  <Rbt.Executable>
rbdock ($Id: //depot/dev/client3/rdock/2013.1/src/exe/rbdock.cxx#4 $)

>  <Rbt.Library>
libRbt.so (2013.1, Build901 2013/11/27)

>  <Rbt.Parameter_File>
/usr/local/tools/_conda/envs/__rdock@2013.1-0/share/rdock-2013.1-1/data/scripts/dock.prm

>  <Rbt.Receptor>
receptor.prm

>  <SCORE>
11.4367

>  <SCORE.INTER>
18.4

>  <SCORE.INTER.CONST>
1

>  <SCORE.INTER.POLAR>
0

>  <SCORE.INTER.REPUL>
0

>  <SCORE.INTER.ROT>
13

>  <SCORE.INTER.VDW>
0

>  <SCORE.INTER.norm>
0.4

>  <SCORE.INTRA>
-6.96333

>  <SCORE.INTRA.DIHEDRAL>
4.93521

>  <SCORE.INTRA.DIHEDRAL.0>
6.89604

>  <SCORE.INTRA.POLAR>
0

>  <SCORE.INTRA.POLAR.0>
0

>  <SCORE.INTRA.REPUL>
0

>  <SCORE.INTRA.REPUL.0>
0

>  <SCORE.INTRA.VDW>
-9.43094

>  <SCORE.INTRA.VDW.0>
0.216679

>  <SCORE.INTRA.norm>
-0.151377

>  <SCORE.RESTR>


>  <SCORE.RESTR.norm>
0

>  <SCORE.SYSTEM>
0

>  <SCORE.SYSTEM.CONST>
0

>  <SCORE.SYSTEM.DIHEDRAL>
0

>  <SCORE.SYSTEM.norm>
0

>  <SCORE.heavy>
46

>  <SCORE.norm>
0.248623

>  <TransFSReceptor>
receptor

>  <TransFSScore>
0.002732

$$$$

 OpenBabel01192115203D
libRbt.so/2013.1/901 2013/11/27
 12 12  0  0  0  0  0  0  0  0999 V2000
  199.2493  197.1212  240.7439 C   0  0  0  0  0  0  0  0  0  0  0  0
  198.7985  197.1439  242.2086 C   0  0  1  0  0  0  0  0  0  0  0  0
  199.5295  198.2606  242.9293 C   0  0  0  0  0  0  0  0  0  0  0  0
  200.3956  198.1813  244.0056 C   0  0  0  0  0  0  0  0  0  0  0  0
  200.8422  199.4563  244.4516 C   0  0  0  0  0  0  0  0  0  0  0  0
  200.3047  200.4776  243.7031 C   0  0  0  0  0  0  0  0  0  0  0  0
  199.2837  199.8959  242.4607 S   0  0  0  0  0  0  0  0  0  0  0  0
  197.4032  197.4391  242.3391 O   0  0  0  0  0  0  0  0  0  0  0  0
  196.5950  197.4412  243.8057 Si  0  0  0  0  0  0  0  0  0  0  0  0
  196.8927  198.9942  244.8109 C   0  0  0  0  0  0  0  0  0  0  0  0
  194.7304  197.3060  243.5178 C   0  0  0  0  0  0  0  0  0  0  0  0
  197.0656  195.9280  244.8246 C   0  0  0  0  0  0  0  0  0  0  0  0
  2  1  1  6  0  0  0
  2  3  1  0  0  0  0
  2  8  1  0  0  0  0
  3  7  1  0  0  0  0
  3  4  2  0  0  0  0
  4  5  1  0  0  0  0
  5  6  2  0  0  0  0
  6  7  1  0  0  0  0
  8  9  1  0  0  0  0
  9 10  1  0  0  0  0
  9 11  1  0  0  0  0
  9 12  1  0  0  0  0
M  END
>  <CHROM.1>
-118.85696837,176.08196481,78.57895814,198.28965195,198.20872259,243.26590772
-0.16319413,-0.52965470,-2.16768042

>  <Name>


>  <RI>
0

>  <Rbt.Current_Directory>
/data/dnb03/galaxy_db/job_working_directory/014/442/14442345/working

>  <Rbt.Executable>
rbdock ($Id: //depot/dev/client3/rdock/2013.1/src/exe/rbdock.cxx#4 $)

>  <Rbt.Library>
libRbt.so (2013.1, Build901 2013/11/27)

>  <Rbt.Parameter_File>
/usr/local/tools/_conda/envs/__rdock@2013.1-0/share/rdock-2013.1-1/data/scripts/dock.prm

>  <Rbt.Receptor>
receptor.prm

>  <SCORE>
7.05565

>  <SCORE.INTER>
8.4

>  <SCORE.INTER.CONST>
1

>  <SCORE.INTER.POLAR>
0

>  <SCORE.INTER.REPUL>
0

>  <SCORE.INTER.ROT>
3

>  <SCORE.INTER.VDW>
0

>  <SCORE.INTER.norm>
0.7

>  <SCORE.INTRA>
-1.34435

>  <SCORE.INTRA.DIHEDRAL>
-1.10859

>  <SCORE.INTRA.DIHEDRAL.0>
1.67353

>  <SCORE.INTRA.POLAR>
0

>  <SCORE.INTRA.POLAR.0>
0

>  <SCORE.INTRA.REPUL>
0

>  <SCORE.INTRA.REPUL.0>
0

>  <SCORE.INTRA.VDW>
-0.790052

>  <SCORE.INTRA.VDW.0>
-0.75461

>  <SCORE.INTRA.norm>
-0.112029

>  <SCORE.RESTR>


>  <SCORE.RESTR.norm>
0

>  <SCORE.SYSTEM>
0

>  <SCORE.SYSTEM.CONST>
0

>  <SCORE.SYSTEM.DIHEDRAL>
0

>  <SCORE.SYSTEM.norm>
0

>  <SCORE.heavy>
12

>  <SCORE.norm>
0.587971

>  <TransFSReceptor>
receptor

>  <TransFSScore>
0.004079

$$$$

 OpenBabel01192115203D
libRbt.so/2013.1/901 2013/11/27
 33 36  0  0  0  0  0  0  0  0999 V2000
  210.0898  195.5699  254.6041 C   0  0  0  0  0  0  0  0  0  0  0  0
  210.3448  197.0394  254.3788 C   0  0  0  0  0  0  0  0  0  0  0  0
  210.7577  197.5894  253.2058 C   0  0  0  0  0  0  0  0  0  0  0  0
  211.1187  199.0852  253.1291 C   0  0  2  0  0  0  0  0  0  0  0  0
  210.8951  199.7601  254.4029 N   0  0  0  0  0  0  0  0  0  0  0  0
  210.4655  199.1530  255.5408 C   0  0  0  0  0  0  0  0  0  0  0  0
  210.4390  200.0376  256.5063 N   0  0  0  0  0  0  0  0  0  0  0  0
  210.8858  201.2195  255.9395 N   0  0  0  0  0  0  0  0  0  0  0  0
  211.2013  201.0495  254.6605 N   0  0  0  0  0  0  0  0  0  0  0  0
  210.1841  197.8366  255.5115 N   0  0  0  0  0  0  0  0  0  0  0  0
  210.4515  199.8859  252.0173 C   0  0  0  0  0  0  0  0  0  0  0  0
  211.2516  200.8107  251.3141 C   0  0  0  0  0  0  0  0  0  0  0  0
  210.7412  201.6063  250.2887 C   0  0  0  0  0  0  0  0  0  0  0  0
  209.4092  201.4161  249.8915 C   0  0  0  0  0  0  0  0  0  0  0  0
  208.5918  200.5321  250.6105 C   0  0  0  0  0  0  0  0  0  0  0  0
  209.0987  199.7785  251.6739 C   0  0  0  0  0  0  0  0  0  0  0  0
  208.7646  202.0384  248.8523 O   0  0  0  0  0  0  0  0  0  0  0  0
  209.4566  202.0356  247.6031 C   0  0  0  0  0  0  0  0  0  0  0  0
  209.7478  200.6086  247.1990 C   0  0  0  0  0  0  0  0  0  0  0  0
  208.7331  199.8146  246.6427 C   0  0  0  0  0  0  0  0  0  0  0  0
  208.9877  198.4861  246.2846 C   0  0  0  0  0  0  0  0  0  0  0  0
  210.2581  197.9519  246.4885 C   0  0  0  0  0  0  0  0  0  0  0  0
  211.2749  198.7315  247.0402 C   0  0  0  0  0  0  0  0  0  0  0  0
  211.0197  200.0530  247.3996 C   0  0  0  0  0  0  0  0  0  0  0  0
  210.6051  196.1623  246.0055 Br  0  0  0  0  0  0  0  0  0  0  0  0
  211.5203  202.5144  249.6219 O   0  0  0  0  0  0  0  0  0  0  0  0
  212.0614  203.5852  250.3923 C   0  0  0  0  0  0  0  0  0  0  0  0
  211.0481  196.8647  251.9385 C   0  0  0  0  0  0  0  0  0  0  0  0
  210.6110  195.7376  251.7353 O   0  0  0  0  0  0  0  0  0  0  0  0
  211.8763  197.4497  251.0380 N   0  0  0  0  0  0  0  0  0  0  0  0
  209.9554  197.3755  256.3881 H   0  0  0  0  0  0  0  0  0  0  0  0
  212.3496  198.3282  251.1628 H   0  0  0  0  0  0  0  0  0  0  0  0
  212.1100  196.9032  250.2171 H   0  0  0  0  0  0  0  0  0  0  0  0
  1  2  1  0  0  0  0
  2 10  1  0  0  0  0
  2  3  2  0  0  0  0
  3  4  1  0  0  0  0
  3 28  1  0  0  0  0
  4  5  1  0  0  0  0
  4 11  1  6  0  0  0
  5  9  1  0  0  0  0
  5  6  1  0  0  0  0
  6  7  2  0  0  0  0
  6 10  1  0  0  0  0
  7  8  1  0  0  0  0
  8  9  2  0  0  0  0
 10 31  1  0  0  0  0
 11 16  1  0  0  0  0
 11 12  2  0  0  0  0
 12 13  1  0  0  0  0
 13 14  2  0  0  0  0
 13 26  1  0  0  0  0
 14 15  1  0  0  0  0
 14 17  1  0  0  0  0
 15 16  2  0  0  0  0
 17 18  1  0  0  0  0
 18 19  1  0  0  0  0
 19 24  1  0  0  0  0
 19 20  2  0  0  0  0
 20 21  1  0  0  0  0
 21 22  2  0  0  0  0
 22 23  1  0  0  0  0
 22 25  1  0  0  0  0
 23 24  2  0  0  0  0
 26 27  1  0  0  0  0
 28 29  2  0  0  0  0
 28 30  1  0  0  0  0
 30 32  1  0  0  0  0
 30 33  1  0  0  0  0
M  END
>  <CHROM.1>
19.34580139,-137.87002882,-62.86343183,49.12899044,57.34576419,78.18878571
210.44207103,199.02265984,250.38434194,-0.83566397,1.50327517,-2.48573937

>  <Name>


>  <RI>
0

>  <Rbt.Current_Directory>
/data/dnb03/galaxy_db/job_working_directory/014/442/14442346/working

>  <Rbt.Executable>
rbdock ($Id: //depot/dev/client3/rdock/2013.1/src/exe/rbdock.cxx#4 $)

>  <Rbt.Library>
libRbt.so (2013.1, Build901 2013/11/27)

>  <Rbt.Parameter_File>
/usr/local/tools/_conda/envs/__rdock@2013.1-0/share/rdock-2013.1-1/data/scripts/dock.prm

>  <Rbt.Receptor>
receptor.prm

>  <SCORE>
6.8811

>  <SCORE.INTER>
11.4

>  <SCORE.INTER.CONST>
1

>  <SCORE.INTER.POLAR>
0

>  <SCORE.INTER.REPUL>
0

>  <SCORE.INTER.ROT>
6

>  <SCORE.INTER.VDW>
0

>  <SCORE.INTER.norm>
0.38

>  <SCORE.INTRA>
-4.5189

>  <SCORE.INTRA.DIHEDRAL>
-1.18271

>  <SCORE.INTRA.DIHEDRAL.0>
10.2068

>  <SCORE.INTRA.POLAR>
0

>  <SCORE.INTRA.POLAR.0>
0

>  <SCORE.INTRA.REPUL>
0

>  <SCORE.INTRA.REPUL.0>
0

>  <SCORE.INTRA.VDW>
-3.92754

>  <SCORE.INTRA.VDW.0>
1.5586

>  <SCORE.INTRA.norm>
-0.15063

>  <SCORE.RESTR>


>  <SCORE.RESTR.norm>
0

>  <SCORE.SYSTEM>
0

>  <SCORE.SYSTEM.CONST>
0

>  <SCORE.SYSTEM.DIHEDRAL>
0

>  <SCORE.SYSTEM.norm>
0

>  <SCORE.heavy>
30

>  <SCORE.norm>
0.22937

>  <TransFSReceptor>
receptor

>  <TransFSScore>
0.000018

$$$$

 OpenBabel01192115203D
libRbt.so/2013.1/901 2013/11/27
 34 37  0  0  0  0  0  0  0  0999 V2000
  220.9876  200.6943  183.1567 C   0  0  0  0  0  0  0  0  0  0  0  0
  219.8794  201.6727  183.4109 C   0  0  0  0  0  0  0  0  0  0  0  0
  219.5487  202.6429  182.4535 C   0  0  0  0  0  0  0  0  0  0  0  0
  218.5264  203.5908  182.6785 C   0  0  0  0  0  0  0  0  0  0  0  0
  217.8167  203.5454  183.8945 C   0  0  0  0  0  0  0  0  0  0  0  0
  218.1737  202.5794  184.8533 C   0  0  0  0  0  0  0  0  0  0  0  0
  219.1852  201.6518  184.6160 C   0  0  0  0  0  0  0  0  0  0  0  0
  216.7626  204.4357  184.2185 N   0  0  0  0  0  0  0  0  0  0  0  0
  215.6635  204.6568  183.4375 C   0  0  0  0  0  0  0  0  0  0  0  0
  215.4228  204.3083  182.2911 O   0  0  0  0  0  0  0  0  0  0  0  0
  214.6297  205.3403  184.2826 C   0  0  0  0  0  0  0  0  0  0  0  0
  215.1647  205.4402  185.4973 C   0  0  0  0  0  0  0  0  0  0  0  0
  216.5080  204.8521  185.4939 C   0  0  0  0  0  0  0  0  0  0  0  0
  217.2111  204.7642  186.4881 O   0  0  0  0  0  0  0  0  0  0  0  0
  214.4252  205.9261  186.9486 Cl  0  0  0  0  0  0  0  0  0  0  0  0
  213.3725  205.5912  183.7713 N   0  0  0  0  0  0  0  0  0  0  0  0
  212.3459  206.3748  184.3283 C   0  0  0  0  0  0  0  0  0  0  0  0
  210.9938  206.1851  184.0133 C   0  0  0  0  0  0  0  0  0  0  0  0
  210.0028  207.0062  184.5553 C   0  0  0  0  0  0  0  0  0  0  0  0
  210.3520  208.0368  185.4235 C   0  0  0  0  0  0  0  0  0  0  0  0
  211.6962  208.2574  185.7433 C   0  0  0  0  0  0  0  0  0  0  0  0
  212.6862  207.4217  185.2016 C   0  0  0  0  0  0  0  0  0  0  0  0
  212.0150  209.3589  186.6947 C   0  0  0  0  0  0  0  0  0  0  0  0
  211.1120  210.0584  187.1411 O   0  0  0  0  0  0  0  0  0  0  0  0
  213.3463  209.5429  187.0109 N   0  0  0  0  0  0  0  0  0  0  0  0
  213.7748  210.6216  187.8953 C   0  0  0  0  0  0  0  0  0  0  0  0
  215.0125  210.1894  188.6887 C   0  0  0  0  0  0  0  0  0  0  0  0
  215.5172  211.3070  189.5975 C   0  0  0  0  0  0  0  0  0  0  0  0
  215.7950  212.5833  188.8098 C   0  0  0  0  0  0  0  0  0  0  0  0
  214.5705  213.0264  188.0140 C   0  0  0  0  0  0  0  0  0  0  0  0
  214.0479  211.9112  187.1083 C   0  0  0  0  0  0  0  0  0  0  0  0
  218.3157  204.6650  181.6467 C   0  0  0  0  0  0  0  0  0  0  0  0
  213.2914  205.4269  182.7665 H   0  0  0  0  0  0  0  0  0  0  0  0
  214.0475  209.1052  186.4288 H   0  0  0  0  0  0  0  0  0  0  0  0
  1  2  1  0  0  0  0
  2  7  1  0  0  0  0
  2  3  2  0  0  0  0
  3  4  1  0  0  0  0
  4  5  2  0  0  0  0
  4 32  1  0  0  0  0
  5  6  1  0  0  0  0
  5  8  1  0  0  0  0
  6  7  2  0  0  0  0
  8 13  1  0  0  0  0
  8  9  1  0  0  0  0
  9 10  2  0  0  0  0
  9 11  1  0  0  0  0
 11 12  2  0  0  0  0
 11 16  1  0  0  0  0
 12 13  1  0  0  0  0
 12 15  1  0  0  0  0
 13 14  2  0  0  0  0
 16 17  1  0  0  0  0
 16 33  1  0  0  0  0
 17 22  1  0  0  0  0
 17 18  2  0  0  0  0
 18 19  1  0  0  0  0
 19 20  2  0  0  0  0
 20 21  1  0  0  0  0
 21 22  2  0  0  0  0
 21 23  1  0  0  0  0
 23 24  2  0  0  0  0
 23 25  1  0  0  0  0
 25 26  1  0  0  0  0
 25 34  1  0  0  0  0
 26 31  1  0  0  0  0
 26 27  1  0  0  0  0
 27 28  1  0  0  0  0
 28 29  1  0  0  0  0
 29 30  1  0  0  0  0
 30 31  1  0  0  0  0
M  END
>  <CHROM.1>
53.53650195,-170.21820145,-155.90075658,-1.90358927,148.16055675,215.12589294
206.53114197,185.39611353,-0.99015055,-0.21968270,0.61808483

>  <Name>


>  <RI>
0

>  <Rbt.Current_Directory>
/data/dnb03/galaxy_db/job_working_directory/014/442/14442347/working

>  <Rbt.Executable>
rbdock ($Id: //depot/dev/client3/rdock/2013.1/src/exe/rbdock.cxx#4 $)

>  <Rbt.Library>
libRbt.so (2013.1, Build901 2013/11/27)

>  <Rbt.Parameter_File>
/usr/local/tools/_conda/envs/__rdock@2013.1-0/share/rdock-2013.1-1/data/scripts/dock.prm

>  <Rbt.Receptor>
receptor.prm

>  <SCORE>
3.0228

>  <SCORE.INTER>
10.4

>  <SCORE.INTER.CONST>
1

>  <SCORE.INTER.POLAR>
0

>  <SCORE.INTER.REPUL>
0

>  <SCORE.INTER.ROT>
5

>  <SCORE.INTER.VDW>
0

>  <SCORE.INTER.norm>
0.325

>  <SCORE.INTRA>
-7.3772

>  <SCORE.INTRA.DIHEDRAL>
-18.0911

>  <SCORE.INTRA.DIHEDRAL.0>
33.1081

>  <SCORE.INTRA.POLAR>
0

>  <SCORE.INTRA.POLAR.0>
0

>  <SCORE.INTRA.REPUL>
0

>  <SCORE.INTRA.REPUL.0>
0

>  <SCORE.INTRA.VDW>
1.66833

>  <SCORE.INTRA.VDW.0>
-3.07918

>  <SCORE.INTRA.norm>
-0.230538

>  <SCORE.RESTR>


>  <SCORE.RESTR.norm>
0

>  <SCORE.SYSTEM>
0

>  <SCORE.SYSTEM.CONST>
0

>  <SCORE.SYSTEM.DIHEDRAL>
0

>  <SCORE.SYSTEM.norm>
0

>  <SCORE.heavy>
32

>  <SCORE.norm>
0.0944624

>  <TransFSReceptor>
receptor

>  <TransFSScore>
0.000079

$$$$

 OpenBabel01192115203D
libRbt.so/2013.1/901 2013/11/27
  9  8  0  0  0  0  0  0  0  0999 V2000
  220.0144  187.9191  243.7523 C   0  0  0  0  0  0  0  0  0  0  0  0
  218.6001  187.5701  244.2367 C   0  0  0  0  0  0  0  0  0  0  0  0
  218.4969  187.5226  245.7599 C   0  0  1  0  0  0  0  0  0  0  0  0
  218.8014  188.8876  246.3396 N   0  3  0  0  0  0  0  0  0  0  0  0
  218.0431  189.8330  246.0571 O   0  0  0  0  0  0  0  0  0  0  0  0
  219.8157  188.9785  247.0416 O   0  5  0  0  0  0  0  0  0  0  0  0
  216.8643  187.0905  246.3272 Cl  0  0  0  0  0  0  0  0  0  0  0  0
  220.0908  187.9577  242.2364 C   0  0  0  0  0  0  0  0  0  0  0  0
  221.3619  188.2682  241.8714 F   0  0  0  0  0  0  0  0  0  0  0  0
  1  2  1  0  0  0  0
  1  8  1  0  0  0  0
  2  3  1  0  0  0  0
  3  4  1  0  0  0  0
  3  7  1  6  0  0  0
  4  5  2  0  0  0  0
  4  6  1  0  0  0  0
  8  9  1  0  0  0  0
M  CHG  2   4   1   6  -1
M  END
>  <CHROM.1>
179.91043535,-179.90340032,62.56375846,63.38589064,218.88098093,188.10473232
244.99280858,0.72819057,-0.63424598,-2.11159458

>  <Name>


>  <RI>
0

>  <Rbt.Current_Directory>
/data/dnb03/galaxy_db/job_working_directory/014/442/14442348/working

>  <Rbt.Executable>
rbdock ($Id: //depot/dev/client3/rdock/2013.1/src/exe/rbdock.cxx#4 $)

>  <Rbt.Library>
libRbt.so (2013.1, Build901 2013/11/27)

>  <Rbt.Parameter_File>
/usr/local/tools/_conda/envs/__rdock@2013.1-0/share/rdock-2013.1-1/data/scripts/dock.prm

>  <Rbt.Receptor>
receptor.prm

>  <SCORE>
8.954

>  <SCORE.INTER>
9.4

>  <SCORE.INTER.CONST>
1

>  <SCORE.INTER.POLAR>
0

>  <SCORE.INTER.REPUL>
0

>  <SCORE.INTER.ROT>
4

>  <SCORE.INTER.VDW>
0

>  <SCORE.INTER.norm>
1.04444

>  <SCORE.INTRA>
-0.446

>  <SCORE.INTRA.DIHEDRAL>
0.0362586

>  <SCORE.INTRA.DIHEDRAL.0>
2.41631

>  <SCORE.INTRA.POLAR>
0

>  <SCORE.INTRA.POLAR.0>
0

>  <SCORE.INTRA.REPUL>
0

>  <SCORE.INTRA.REPUL.0>
0

>  <SCORE.INTRA.VDW>
-0.46413

>  <SCORE.INTRA.VDW.0>
-0.43174

>  <SCORE.INTRA.norm>
-0.0495556

>  <SCORE.RESTR>


>  <SCORE.RESTR.norm>
0

>  <SCORE.SYSTEM>
0

>  <SCORE.SYSTEM.CONST>
0

>  <SCORE.SYSTEM.DIHEDRAL>
0

>  <SCORE.SYSTEM.norm>
0

>  <SCORE.heavy>
9

>  <SCORE.norm>
0.994889

>  <TransFSReceptor>
receptor

>  <TransFSScore>
0.008565

$$$$

 OpenBabel01192115203D
libRbt.so/2013.1/901 2013/11/27
 12 12  0  0  0  0  0  0  0  0999 V2000
  205.7611  185.9524  241.2584 C   0  0  0  0  0  0  0  0  0  0  0  0
  205.6681  185.7349  239.8815 C   0  0  0  0  0  0  0  0  0  0  0  0
  204.4229  185.5037  239.3054 C   0  0  0  0  0  0  0  0  0  0  0  0
  203.2719  185.4910  240.0835 C   0  0  0  0  0  0  0  0  0  0  0  0
  203.3651  185.7025  241.4582 C   0  0  0  0  0  0  0  0  0  0  0  0
  204.6115  185.9303  242.0608 C   0  0  0  0  0  0  0  0  0  0  0  0
  204.6988  186.1558  243.5530 C   0  0  0  0  0  0  0  0  0  0  0  0
  204.9757  184.8779  244.3442 C   0  0  0  0  0  0  0  0  0  0  0  0
  203.9515  183.9071  244.1508 O   0  0  0  0  0  0  0  0  0  0  0  0
  204.2854  185.2816  237.9689 O   0  0  0  0  0  0  0  0  0  0  0  0
  204.1940  183.1307  244.6867 H   0  0  0  0  0  0  0  0  0  0  0  0
  205.1626  185.3174  237.5566 H   0  0  0  0  0  0  0  0  0  0  0  0
  1  6  1  0  0  0  0
  1  2  2  0  0  0  0
  2  3  1  0  0  0  0
  3  4  2  0  0  0  0
  3 10  1  0  0  0  0
  4  5  1  0  0  0  0
  5  6  2  0  0  0  0
  6  7  1  0  0  0  0
  7  8  1  0  0  0  0
  8  9  1  0  0  0  0
  9 11  1  0  0  0  0
 10 12  1  0  0  0  0
M  END
>  <CHROM.1>
0.04028495,-86.82751216,-60.21431815,-179.64560965,204.49194255,185.39578239
241.43500649,-1.58014660,0.48393947,1.69950373

>  <Name>


>  <RI>
0

>  <Rbt.Current_Directory>
/data/dnb03/galaxy_db/job_working_directory/014/442/14442349/working

>  <Rbt.Executable>
rbdock ($Id: //depot/dev/client3/rdock/2013.1/src/exe/rbdock.cxx#4 $)

>  <Rbt.Library>
libRbt.so (2013.1, Build901 2013/11/27)

>  <Rbt.Parameter_File>
/usr/local/tools/_conda/envs/__rdock@2013.1-0/share/rdock-2013.1-1/data/scripts/dock.prm

>  <Rbt.Receptor>
receptor.prm

>  <SCORE>
7.18214

>  <SCORE.INTER>
7.4

>  <SCORE.INTER.CONST>
1

>  <SCORE.INTER.POLAR>
0

>  <SCORE.INTER.REPUL>
0

>  <SCORE.INTER.ROT>
2

>  <SCORE.INTER.VDW>
0

>  <SCORE.INTER.norm>
0.74

>  <SCORE.INTRA>
-0.217864

>  <SCORE.INTRA.DIHEDRAL>
-0.365574

>  <SCORE.INTRA.DIHEDRAL.0>
1.0792

>  <SCORE.INTRA.POLAR>
0

>  <SCORE.INTRA.POLAR.0>
0

>  <SCORE.INTRA.REPUL>
0

>  <SCORE.INTRA.REPUL.0>
0

>  <SCORE.INTRA.VDW>
-0.0350773

>  <SCORE.INTRA.VDW.0>
-0.290599

>  <SCORE.INTRA.norm>
-0.0217864

>  <SCORE.RESTR>


>  <SCORE.RESTR.norm>
0

>  <SCORE.SYSTEM>
0

>  <SCORE.SYSTEM.CONST>
0

>  <SCORE.SYSTEM.DIHEDRAL>
0

>  <SCORE.SYSTEM.norm>
0

>  <SCORE.heavy>
10

>  <SCORE.norm>
0.718214

>  <TransFSReceptor>
receptor

>  <TransFSScore>
0.002848

$$$$

 OpenBabel01192115203D
libRbt.so/2013.1/901 2013/11/27
 11 11  0  0  0  0  0  0  0  0999 V2000
  183.2735  207.8559  251.1211 C   0  0  0  0  0  0  0  0  0  0  0  0
  183.9563  207.7671  252.3370 C   0  0  0  0  0  0  0  0  0  0  0  0
  184.3505  208.9304  253.0065 C   0  0  0  0  0  0  0  0  0  0  0  0
  184.0650  210.1932  252.4604 C   0  0  0  0  0  0  0  0  0  0  0  0
  183.3770  210.2728  251.2370 C   0  0  0  0  0  0  0  0  0  0  0  0
  182.9840  209.1075  250.5716 C   0  0  0  0  0  0  0  0  0  0  0  0
  184.4827  211.4464  253.1824 C   0  0  0  0  0  0  0  0  0  0  0  0
  184.4170  211.2049  255.1236 Se  0  0  1  0  0  0  0  0  0  0  0  0
  184.3760  212.8295  255.3858 O   0  0  0  0  0  0  0  0  0  0  0  0
  182.5791  211.1472  255.0918 O   0  0  0  0  0  0  0  0  0  0  0  0
  182.3623  210.2382  254.7649 H   0  0  0  0  0  0  0  0  0  0  0  0
  1  6  1  0  0  0  0
  1  2  2  0  0  0  0
  2  3  1  0  0  0  0
  3  4  2  0  0  0  0
  4  5  1  0  0  0  0
  4  7  1  0  0  0  0
  5  6  2  0  0  0  0
  7  8  1  0  0  0  0
  8  9  2  1  0  0  0
  8 10  1  0  0  0  0
 10 11  1  0  0  0  0
M  END
>  <CHROM.1>
-33.11499243,-160.51174717,77.33575422,183.97690692,210.50534533,253.73657389
-2.27221045,-1.33447050,0.22555437

>  <Name>


>  <RI>
0

>  <Rbt.Current_Directory>
/data/dnb03/galaxy_db/job_working_directory/014/442/14442350/working

>  <Rbt.Executable>
rbdock ($Id: //depot/dev/client3/rdock/2013.1/src/exe/rbdock.cxx#4 $)

>  <Rbt.Library>
libRbt.so (2013.1, Build901 2013/11/27)

>  <Rbt.Parameter_File>
/usr/local/tools/_conda/envs/__rdock@2013.1-0/share/rdock-2013.1-1/data/scripts/dock.prm

>  <Rbt.Receptor>
receptor.prm

>  <SCORE>
6.84986

>  <SCORE.INTER>
7.4

>  <SCORE.INTER.CONST>
1

>  <SCORE.INTER.POLAR>
0

>  <SCORE.INTER.REPUL>
0

>  <SCORE.INTER.ROT>
2

>  <SCORE.INTER.VDW>
0

>  <SCORE.INTER.norm>
0.74

>  <SCORE.INTRA>
-0.55014

>  <SCORE.INTRA.DIHEDRAL>
-0.512842

>  <SCORE.INTRA.DIHEDRAL.0>
1.69726

>  <SCORE.INTRA.POLAR>
0

>  <SCORE.INTRA.POLAR.0>
0

>  <SCORE.INTRA.REPUL>
0

>  <SCORE.INTRA.REPUL.0>
0

>  <SCORE.INTRA.VDW>
-0.29372

>  <SCORE.INTRA.VDW.0>
-0.761984

>  <SCORE.INTRA.norm>
-0.055014

>  <SCORE.RESTR>


>  <SCORE.RESTR.norm>
0

>  <SCORE.SYSTEM>
0

>  <SCORE.SYSTEM.CONST>
0

>  <SCORE.SYSTEM.DIHEDRAL>
0

>  <SCORE.SYSTEM.norm>
0

>  <SCORE.heavy>
10

>  <SCORE.norm>
0.684986

>  <TransFSReceptor>
receptor

>  <TransFSScore>
0.095814

$$$$

 OpenBabel01192115203D
libRbt.so/2013.1/901 2013/11/27
 26 29  0  0  0  0  0  0  0  0999 V2000
  197.7259  197.9551  247.3500 C   0  0  0  0  0  0  0  0  0  0  0  0
  197.5148  199.0416  248.4026 C   0  0  0  0  0  0  0  0  0  0  0  0
  197.6069  200.4013  247.8524 N   0  0  0  0  0  0  0  0  0  0  0  0
  197.8251  201.4019  248.9064 C   0  0  0  0  0  0  0  0  0  0  0  0
  196.4353  201.8356  249.3196 C   0  0  0  0  0  0  0  0  0  0  0  0
  195.6969  201.8914  247.9964 C   0  0  0  0  0  0  0  0  0  0  0  0
  196.3717  200.8203  247.1345 C   0  0  1  0  0  0  0  0  0  0  0  0
  196.7949  201.3207  245.7365 C   0  0  0  0  0  0  0  0  0  0  0  0
  197.2016  200.2704  244.8010 N   0  0  0  0  0  0  0  0  0  0  0  0
  197.8994  200.7560  243.5695 C   0  0  2  0  0  0  0  0  0  0  0  0
  199.4275  200.5495  243.7871 C   0  0  0  0  0  0  0  0  0  0  0  0
  199.9526  201.2241  245.0381 C   0  0  0  0  0  0  0  0  0  0  0  0
  200.0668  202.6181  245.0959 C   0  0  0  0  0  0  0  0  0  0  0  0
  200.4606  203.2429  246.2878 C   0  0  0  0  0  0  0  0  0  0  0  0
  200.7403  202.4861  247.4241 C   0  0  0  0  0  0  0  0  0  0  0  0
  200.6483  201.0997  247.3637 C   0  0  0  0  0  0  0  0  0  0  0  0
  200.2617  200.4667  246.1826 C   0  0  0  0  0  0  0  0  0  0  0  0
  201.0055  200.1604  248.7606 Cl  0  0  0  0  0  0  0  0  0  0  0  0
  199.8351  203.6191  243.6570 S   0  0  0  0  0  0  0  0  0  0  0  0
  198.1171  203.3694  243.2422 C   0  0  0  0  0  0  0  0  0  0  0  0
  197.4570  204.5758  242.9107 C   0  0  0  0  0  0  0  0  0  0  0  0
  196.1460  204.5960  242.4461 C   0  0  0  0  0  0  0  0  0  0  0  0
  195.4932  203.4003  242.2212 C   0  0  0  0  0  0  0  0  0  0  0  0
  196.1469  202.2014  242.5028 C   0  0  0  0  0  0  0  0  0  0  0  0
  197.4311  202.1457  243.1075 C   0  0  0  0  0  0  0  0  0  0  0  0
  196.3785  199.7409  244.5213 H   0  0  0  0  0  0  0  0  0  0  0  0
  1  2  1  0  0  0  0
  2  3  1  0  0  0  0
  3  7  1  0  0  0  0
  3  4  1  0  0  0  0
  4  5  1  0  0  0  0
  5  6  1  0  0  0  0
  6  7  1  0  0  0  0
  7  8  1  6  0  0  0
  8  9  1  0  0  0  0
  9 26  1  0  0  0  0
 10  9  1  1  0  0  0
 10 25  1  0  0  0  0
 10 11  1  0  0  0  0
 11 12  1  0  0  0  0
 12 17  1  0  0  0  0
 12 13  2  0  0  0  0
 13 14  1  0  0  0  0
 13 19  1  0  0  0  0
 14 15  2  0  0  0  0
 15 16  1  0  0  0  0
 16 17  2  0  0  0  0
 16 18  1  0  0  0  0
 19 20  1  0  0  0  0
 20 25  1  0  0  0  0
 20 21  2  0  0  0  0
 21 22  1  0  0  0  0
 22 23  2  0  0  0  0
 23 24  1  0  0  0  0
 24 25  2  0  0  0  0
M  END
>  <CHROM.1>
-162.02719909,73.12625807,-166.74935396,100.10982935,198.38580923,201.61941111
245.77930774,1.30759496,0.13068487,2.10973559

>  <Name>


>  <RI>
0

>  <Rbt.Current_Directory>
/data/dnb03/galaxy_db/job_working_directory/014/442/14442351/working

>  <Rbt.Executable>
rbdock ($Id: //depot/dev/client3/rdock/2013.1/src/exe/rbdock.cxx#4 $)

>  <Rbt.Library>
libRbt.so (2013.1, Build901 2013/11/27)

>  <Rbt.Parameter_File>
/usr/local/tools/_conda/envs/__rdock@2013.1-0/share/rdock-2013.1-1/data/scripts/dock.prm

>  <Rbt.Receptor>
receptor.prm

>  <SCORE>
6.81876

>  <SCORE.INTER>
9.4

>  <SCORE.INTER.CONST>
1

>  <SCORE.INTER.POLAR>
0

>  <SCORE.INTER.REPUL>
0

>  <SCORE.INTER.ROT>
4

>  <SCORE.INTER.VDW>
0

>  <SCORE.INTER.norm>
0.376

>  <SCORE.INTRA>
-2.58124

>  <SCORE.INTRA.DIHEDRAL>
2.54768

>  <SCORE.INTRA.DIHEDRAL.0>
0.595435

>  <SCORE.INTRA.POLAR>
0

>  <SCORE.INTRA.POLAR.0>
0

>  <SCORE.INTRA.REPUL>
0

>  <SCORE.INTRA.REPUL.0>
0

>  <SCORE.INTRA.VDW>
-3.85508

>  <SCORE.INTRA.VDW.0>
-0.150056

>  <SCORE.INTRA.norm>
-0.103249

>  <SCORE.RESTR>


>  <SCORE.RESTR.norm>
0

>  <SCORE.SYSTEM>
0

>  <SCORE.SYSTEM.CONST>
0

>  <SCORE.SYSTEM.DIHEDRAL>
0

>  <SCORE.SYSTEM.norm>
0

>  <SCORE.heavy>
25

>  <SCORE.norm>
0.272751

>  <TransFSReceptor>
receptor

>  <TransFSScore>
0.000249

$$$$

 OpenBabel01192115203D
libRbt.so/2013.1/901 2013/11/27
 16 16  0  0  0  0  0  0  0  0999 V2000
  191.4854  210.1135  251.1357 C   0  0  0  0  0  0  0  0  0  0  0  0
  191.4452  210.6421  252.5719 C   0  0  0  0  0  0  0  0  0  0  0  0
  189.9980  210.9732  252.9426 C   0  0  0  0  0  0  0  0  0  0  0  0
  191.9871  209.6149  253.4555 N   0  0  0  0  0  0  0  0  0  0  0  0
  193.3576  209.4096  253.4543 C   0  0  0  0  0  0  0  0  0  0  0  0
  193.8717  208.3221  252.9030 N   0  0  0  0  0  0  0  0  0  0  0  0
  195.1950  208.2665  252.8999 C   0  0  0  0  0  0  0  0  0  0  0  0
  196.0050  209.1864  253.4142 N   0  0  0  0  0  0  0  0  0  0  0  0
  195.3993  210.2318  253.9498 C   0  0  0  0  0  0  0  0  0  0  0  0
  194.0804  210.3739  254.0102 N   0  0  0  0  0  0  0  0  0  0  0  0
  196.2409  211.2351  254.3920 N   0  0  0  0  0  0  0  0  0  0  0  0
  196.5036  212.3615  253.5308 C   0  0  0  0  0  0  0  0  0  0  0  0
  195.9965  206.8644  252.1502 S   0  0  0  0  0  0  0  0  0  0  0  0
  196.1095  207.4261  250.4343 C   0  0  0  0  0  0  0  0  0  0  0  0
  191.5642  208.6963  253.3862 H   0  0  0  0  0  0  0  0  0  0  0  0
  195.9905  211.4586  255.3497 H   0  0  0  0  0  0  0  0  0  0  0  0
  1  2  1  0  0  0  0
  2  3  1  0  0  0  0
  2  4  1  0  0  0  0
  4  5  1  0  0  0  0
  4 15  1  0  0  0  0
  5 10  1  0  0  0  0
  5  6  2  0  0  0  0
  6  7  1  0  0  0  0
  7  8  2  0  0  0  0
  7 13  1  0  0  0  0
  8  9  1  0  0  0  0
  9 10  2  0  0  0  0
  9 11  1  0  0  0  0
 11 12  1  0  0  0  0
 11 16  1  0  0  0  0
 13 14  1  0  0  0  0
M  END
>  <CHROM.1>
74.31038956,-107.75800082,87.53902275,96.21323748,194.26127766,209.42921290
252.86209789,2.69677689,-0.17534363,0.51382170

>  <Name>


>  <RI>
0

>  <Rbt.Current_Directory>
/data/dnb03/galaxy_db/job_working_directory/014/442/14442352/working

>  <Rbt.Executable>
rbdock ($Id: //depot/dev/client3/rdock/2013.1/src/exe/rbdock.cxx#4 $)

>  <Rbt.Library>
libRbt.so (2013.1, Build901 2013/11/27)

>  <Rbt.Parameter_File>
/usr/local/tools/_conda/envs/__rdock@2013.1-0/share/rdock-2013.1-1/data/scripts/dock.prm

>  <Rbt.Receptor>
receptor.prm

>  <SCORE>
6.97012

>  <SCORE.INTER>
9.4

>  <SCORE.INTER.CONST>
1

>  <SCORE.INTER.POLAR>
0

>  <SCORE.INTER.REPUL>
0

>  <SCORE.INTER.ROT>
4

>  <SCORE.INTER.VDW>
0

>  <SCORE.INTER.norm>
0.671429

>  <SCORE.INTRA>
-2.42988

>  <SCORE.INTRA.DIHEDRAL>
-1.15997

>  <SCORE.INTRA.DIHEDRAL.0>
4.34147

>  <SCORE.INTRA.POLAR>
0

>  <SCORE.INTRA.POLAR.0>
0

>  <SCORE.INTRA.REPUL>
0

>  <SCORE.INTRA.REPUL.0>
0

>  <SCORE.INTRA.VDW>
-1.84989

>  <SCORE.INTRA.VDW.0>
0.919542

>  <SCORE.INTRA.norm>
-0.173563

>  <SCORE.RESTR>


>  <SCORE.RESTR.norm>
0

>  <SCORE.SYSTEM>
0

>  <SCORE.SYSTEM.CONST>
0

>  <SCORE.SYSTEM.DIHEDRAL>
0

>  <SCORE.SYSTEM.norm>
0

>  <SCORE.heavy>
14

>  <SCORE.norm>
0.497866

>  <TransFSReceptor>
receptor

>  <TransFSScore>
0.000058

$$$$

 OpenBabel01192115203D
libRbt.so/2013.1/901 2013/11/27
 28 31  0  0  0  0  0  0  0  0999 V2000
  205.3367  199.0720  246.6403 C   0  0  0  0  0  0  0  0  0  0  0  0
  204.2035  198.2882  247.1063 N   0  0  0  0  0  0  0  0  0  0  0  0
  204.0874  197.9408  248.4876 C   0  0  0  0  0  0  0  0  0  0  0  0
  205.0200  198.3841  249.4335 C   0  0  0  0  0  0  0  0  0  0  0  0
  204.8775  198.0598  250.7816 C   0  0  0  0  0  0  0  0  0  0  0  0
  203.8028  197.2829  251.2019 C   0  0  0  0  0  0  0  0  0  0  0  0
  202.8725  196.8210  250.2702 C   0  0  0  0  0  0  0  0  0  0  0  0
  203.0053  197.1409  248.9107 C   0  0  0  0  0  0  0  0  0  0  0  0
  202.0237  196.6906  247.9184 C   0  0  0  0  0  0  0  0  0  0  0  0
  202.1019  197.1218  246.6530 C   0  0  0  0  0  0  0  0  0  0  0  0
  203.2660  197.8951  246.1665 C   0  0  0  0  0  0  0  0  0  0  0  0
  203.3632  198.1391  244.9659 O   0  0  0  0  0  0  0  0  0  0  0  0
  201.0457  196.7745  245.6469 C   0  0  1  0  0  0  0  0  0  0  0  0
  200.2368  195.5880  246.1113 C   0  0  0  0  0  0  0  0  0  0  0  0
  200.2379  195.1664  247.3891 C   0  0  0  0  0  0  0  0  0  0  0  0
  201.0096  195.8355  248.3472 O   0  0  0  0  0  0  0  0  0  0  0  0
  199.5272  194.0953  247.8769 N   0  0  0  0  0  0  0  0  0  0  0  0
  199.5197  194.8365  245.0017 C   0  0  0  0  0  0  0  0  0  0  0  0
  198.9247  194.2131  244.0812 N   0  0  0  0  0  0  0  0  0  0  0  0
  200.1128  197.9550  245.3623 C   0  0  0  0  0  0  0  0  0  0  0  0
  199.3587  198.5090  246.4234 C   0  0  0  0  0  0  0  0  0  0  0  0
  198.4543  199.5470  246.2070 C   0  0  0  0  0  0  0  0  0  0  0  0
  198.2975  200.0699  244.9301 C   0  0  0  0  0  0  0  0  0  0  0  0
  199.0392  199.5497  243.8704 C   0  0  0  0  0  0  0  0  0  0  0  0
  199.9337  198.4933  244.0771 C   0  0  0  0  0  0  0  0  0  0  0  0
  200.7516  197.8802  242.6851 Cl  0  0  0  0  0  0  0  0  0  0  0  0
  199.8005  193.1828  247.5204 H   0  0  0  0  0  0  0  0  0  0  0  0
  198.5236  194.2482  247.8625 H   0  0  0  0  0  0  0  0  0  0  0  0
  1  2  1  0  0  0  0
  2 11  1  0  0  0  0
  2  3  1  0  0  0  0
  3  8  1  0  0  0  0
  3  4  2  0  0  0  0
  4  5  1  0  0  0  0
  5  6  2  0  0  0  0
  6  7  1  0  0  0  0
  7  8  2  0  0  0  0
  8  9  1  0  0  0  0
  9 16  1  0  0  0  0
  9 10  2  0  0  0  0
 10 11  1  0  0  0  0
 10 13  1  0  0  0  0
 11 12  2  0  0  0  0
 13 14  1  0  0  0  0
 13 20  1  1  0  0  0
 14 15  2  0  0  0  0
 14 18  1  0  0  0  0
 15 16  1  0  0  0  0
 15 17  1  0  0  0  0
 17 27  1  0  0  0  0
 17 28  1  0  0  0  0
 18 19  3  0  0  0  0
 20 25  1  0  0  0  0
 20 21  2  0  0  0  0
 21 22  1  0  0  0  0
 22 23  2  0  0  0  0
 23 24  1  0  0  0  0
 24 25  2  0  0  0  0
 25 26  1  0  0  0  0
M  END
>  <CHROM.1>
-60.28304095,65.45224819,201.52016468,197.37322109,246.54055589,-0.62626621
-0.62894317,-0.90154086

>  <Name>


>  <RI>
0

>  <Rbt.Current_Directory>
/data/dnb03/galaxy_db/job_working_directory/014/442/14442353/working

>  <Rbt.Executable>
rbdock ($Id: //depot/dev/client3/rdock/2013.1/src/exe/rbdock.cxx#4 $)

>  <Rbt.Library>
libRbt.so (2013.1, Build901 2013/11/27)

>  <Rbt.Parameter_File>
/usr/local/tools/_conda/envs/__rdock@2013.1-0/share/rdock-2013.1-1/data/scripts/dock.prm

>  <Rbt.Receptor>
receptor.prm

>  <SCORE>
7.27206

>  <SCORE.INTER>
7.4

>  <SCORE.INTER.CONST>
1

>  <SCORE.INTER.POLAR>
0

>  <SCORE.INTER.REPUL>
0

>  <SCORE.INTER.ROT>
2

>  <SCORE.INTER.VDW>
0

>  <SCORE.INTER.norm>
0.284615

>  <SCORE.INTRA>
-0.127937

>  <SCORE.INTRA.DIHEDRAL>
0.00387653

>  <SCORE.INTRA.DIHEDRAL.0>
1.19778

>  <SCORE.INTRA.POLAR>
0

>  <SCORE.INTRA.POLAR.0>
0

>  <SCORE.INTRA.REPUL>
0

>  <SCORE.INTRA.REPUL.0>
0

>  <SCORE.INTRA.VDW>
-0.129875

>  <SCORE.INTRA.VDW.0>
-2.24359

>  <SCORE.INTRA.norm>
-0.00492066

>  <SCORE.RESTR>


>  <SCORE.RESTR.norm>
0

>  <SCORE.SYSTEM>
0

>  <SCORE.SYSTEM.CONST>
0

>  <SCORE.SYSTEM.DIHEDRAL>
0

>  <SCORE.SYSTEM.norm>
0

>  <SCORE.heavy>
26

>  <SCORE.norm>
0.279695

>  <TransFSReceptor>
receptor

>  <TransFSScore>
0.000066

$$$$

 OpenBabel01192115203D
libRbt.so/2013.1/901 2013/11/27
 23 25  0  0  0  0  0  0  0  0999 V2000
  198.7574  211.7319  254.8844 C   0  0  0  0  0  0  0  0  0  0  0  0
  197.9908  210.7066  255.7222 C   0  0  0  0  0  0  0  0  0  0  0  0
  196.8577  210.1558  254.8394 C   0  0  0  0  0  0  0  0  0  0  0  0
  196.1028  210.8335  254.1484 O   0  0  0  0  0  0  0  0  0  0  0  0
  196.8043  208.8120  254.9952 N   0  0  0  0  0  0  0  0  0  0  0  0
  198.0544  208.4023  255.3066 C   0  0  0  0  0  0  0  0  0  0  0  0
  198.5468  207.2968  255.0832 O   0  0  0  0  0  0  0  0  0  0  0  0
  198.7426  209.4612  255.9258 N   0  0  0  0  0  0  0  0  0  0  0  0
  199.5375  208.9700  257.0436 C   0  0  0  0  0  0  0  0  0  0  0  0
  199.0106  208.9186  258.4115 N   0  0  0  0  0  0  0  0  0  0  0  0
  199.9119  208.3470  259.4230 C   0  0  0  0  0  0  0  0  0  0  0  0
  200.3207  206.8927  259.1689 C   0  0  0  0  0  0  0  0  0  0  0  0
  199.1710  206.0351  259.1203 O   0  0  0  0  0  0  0  0  0  0  0  0
  198.2021  206.4905  258.1693 C   0  0  0  0  0  0  0  0  0  0  0  0
  197.8291  207.9787  258.3862 C   0  0  0  0  0  0  0  0  0  0  0  0
  195.7275  208.0174  254.4608 C   0  0  0  0  0  0  0  0  0  0  0  0
  194.4035  208.4223  254.9916 N   0  0  0  0  0  0  0  0  0  0  0  0
  194.3107  208.3940  256.4735 C   0  0  0  0  0  0  0  0  0  0  0  0
  194.5746  206.9971  257.0609 C   0  0  0  0  0  0  0  0  0  0  0  0
  193.6425  206.0362  256.5391 O   0  0  0  0  0  0  0  0  0  0  0  0
  193.5934  206.0373  255.1059 C   0  0  0  0  0  0  0  0  0  0  0  0
  193.3709  207.4514  254.5332 C   0  0  0  0  0  0  0  0  0  0  0  0
  197.2431  211.3022  256.9168 C   0  0  0  0  0  0  0  0  0  0  0  0
  1  2  1  0  0  0  0
  2  8  1  0  0  0  0
  2  3  1  0  0  0  0
  2 23  1  0  0  0  0
  3  4  2  0  0  0  0
  3  5  1  0  0  0  0
  5  6  1  0  0  0  0
  5 16  1  0  0  0  0
  6  7  2  0  0  0  0
  6  8  1  0  0  0  0
  8  9  1  0  0  0  0
  9 10  1  0  0  0  0
 10 15  1  0  0  0  0
 10 11  1  0  0  0  0
 11 12  1  0  0  0  0
 12 13  1  0  0  0  0
 13 14  1  0  0  0  0
 14 15  1  0  0  0  0
 16 17  1  0  0  0  0
 17 22  1  0  0  0  0
 17 18  1  0  0  0  0
 18 19  1  0  0  0  0
 19 20  1  0  0  0  0
 20 21  1  0  0  0  0
 21 22  1  0  0  0  0
M  END
>  <CHROM.1>
-59.20627092,52.56675433,177.57330824,-56.16507337,197.06441980,208.39456758
256.39222494,-0.25618892,-0.47991776,-0.64501606

>  <Name>


>  <RI>
0

>  <Rbt.Current_Directory>
/data/dnb03/galaxy_db/job_working_directory/014/442/14442370/working

>  <Rbt.Executable>
rbdock ($Id: //depot/dev/client3/rdock/2013.1/src/exe/rbdock.cxx#4 $)

>  <Rbt.Library>
libRbt.so (2013.1, Build901 2013/11/27)

>  <Rbt.Parameter_File>
/usr/local/tools/_conda/envs/__rdock@2013.1-0/share/rdock-2013.1-1/data/scripts/dock.prm

>  <Rbt.Receptor>
receptor.prm

>  <SCORE>
7.87729

>  <SCORE.INTER>
9.4

>  <SCORE.INTER.CONST>
1

>  <SCORE.INTER.POLAR>
0

>  <SCORE.INTER.REPUL>
0

>  <SCORE.INTER.ROT>
4

>  <SCORE.INTER.VDW>
0

>  <SCORE.INTER.norm>
0.408696

>  <SCORE.INTRA>
-1.52271

>  <SCORE.INTRA.DIHEDRAL>
-0.72133

>  <SCORE.INTRA.DIHEDRAL.0>
2.2648

>  <SCORE.INTRA.POLAR>
0

>  <SCORE.INTRA.POLAR.0>
0

>  <SCORE.INTRA.REPUL>
0

>  <SCORE.INTRA.REPUL.0>
0

>  <SCORE.INTRA.VDW>
-1.16204

>  <SCORE.INTRA.VDW.0>
-2.60438

>  <SCORE.INTRA.norm>
-0.0662047

>  <SCORE.RESTR>


>  <SCORE.RESTR.norm>
0

>  <SCORE.SYSTEM>
0

>  <SCORE.SYSTEM.CONST>
0

>  <SCORE.SYSTEM.DIHEDRAL>
0

>  <SCORE.SYSTEM.norm>
0

>  <SCORE.heavy>
23

>  <SCORE.norm>
0.342491

>  <TransFSReceptor>
receptor

>  <TransFSScore>
0.142999

$$$$

 OpenBabel01192115203D
libRbt.so/2013.1/901 2013/11/27
 28 31  0  0  0  0  0  0  0  0999 V2000
  202.9230  209.2911  240.6637 C   0  0  0  0  0  0  0  0  0  0  0  0
  201.5395  209.0157  241.0918 N   0  0  0  0  0  0  0  0  0  0  0  0
  201.4113  207.6033  241.5112 C   0  0  0  0  0  0  0  0  0  0  0  0
  199.9828  207.2068  241.7940 C   0  0  0  0  0  0  0  0  0  0  0  0
  199.4852  206.5162  242.8834 C   0  0  0  0  0  0  0  0  0  0  0  0
  198.0808  206.2973  242.7931 C   0  0  0  0  0  0  0  0  0  0  0  0
  197.5516  206.8274  241.6388 C   0  0  0  0  0  0  0  0  0  0  0  0
  198.7415  207.5848  240.6725 S   0  0  0  0  0  0  0  0  0  0  0  0
  201.2288  209.9540  242.2075 C   0  0  0  0  0  0  0  0  0  0  0  0
  199.9198  210.7572  242.0833 C   0  0  0  0  0  0  0  0  0  0  0  0
  199.7582  211.7335  241.3485 O   0  0  0  0  0  0  0  0  0  0  0  0
  198.8671  210.2210  242.8156 N   0  0  0  0  0  0  0  0  0  0  0  0
  197.4798  210.6404  242.6647 C   0  0  2  0  0  0  0  0  0  0  0  0
  196.7491  209.8680  243.7557 C   0  0  0  0  0  0  0  0  0  0  0  0
  197.8964  209.1045  244.3654 C   0  0  0  0  0  0  0  0  0  0  0  0
  199.0577  209.3125  243.8215 N   0  0  0  0  0  0  0  0  0  0  0  0
  197.7095  208.1917  245.5168 C   0  0  0  0  0  0  0  0  0  0  0  0
  198.8284  207.5256  246.0428 C   0  0  0  0  0  0  0  0  0  0  0  0
  198.6842  206.6450  247.1168 C   0  0  0  0  0  0  0  0  0  0  0  0
  197.4215  206.4299  247.6658 C   0  0  0  0  0  0  0  0  0  0  0  0
  196.3058  207.0940  247.1556 C   0  0  0  0  0  0  0  0  0  0  0  0
  196.4472  207.9778  246.0812 C   0  0  0  0  0  0  0  0  0  0  0  0
  197.2363  205.3351  248.9790 Cl  0  0  0  0  0  0  0  0  0  0  0  0
  196.9890  210.2827  241.2992 C   0  0  0  0  0  0  0  0  0  0  0  0
  195.9276  209.5233  240.8492 C   0  0  0  0  0  0  0  0  0  0  0  0
  195.9503  209.6014  239.4359 C   0  0  0  0  0  0  0  0  0  0  0  0
  197.0211  210.3991  239.1121 C   0  0  0  0  0  0  0  0  0  0  0  0
  197.6670  210.8063  240.2336 O   0  0  0  0  0  0  0  0  0  0  0  0
  1  2  1  0  0  0  0
  2  3  1  0  0  0  0
  2  9  1  0  0  0  0
  3  4  1  0  0  0  0
  4  8  1  0  0  0  0
  4  5  2  0  0  0  0
  5  6  1  0  0  0  0
  6  7  2  0  0  0  0
  7  8  1  0  0  0  0
  9 10  1  0  0  0  0
 10 11  2  0  0  0  0
 10 12  1  0  0  0  0
 12 16  1  0  0  0  0
 12 13  1  0  0  0  0
 13 14  1  0  0  0  0
 13 24  1  6  0  0  0
 14 15  1  0  0  0  0
 15 16  2  0  0  0  0
 15 17  1  0  0  0  0
 17 22  1  0  0  0  0
 17 18  2  0  0  0  0
 18 19  1  0  0  0  0
 19 20  2  0  0  0  0
 20 21  1  0  0  0  0
 20 23  1  0  0  0  0
 21 22  2  0  0  0  0
 24 28  1  0  0  0  0
 24 25  2  0  0  0  0
 25 26  1  0  0  0  0
 26 27  2  0  0  0  0
 27 28  1  0  0  0  0
M  END
>  <CHROM.1>
-172.65887010,129.57786365,-132.86020472,-76.21808040,123.18529475,-179.23309921
198.45295439,208.45752131,243.20582402,-1.35278810,-0.22847504,2.07611106

>  <Name>


>  <RI>
0

>  <Rbt.Current_Directory>
/data/dnb03/galaxy_db/job_working_directory/014/442/14442371/working

>  <Rbt.Executable>
rbdock ($Id: //depot/dev/client3/rdock/2013.1/src/exe/rbdock.cxx#4 $)

>  <Rbt.Library>
libRbt.so (2013.1, Build901 2013/11/27)

>  <Rbt.Parameter_File>
/usr/local/tools/_conda/envs/__rdock@2013.1-0/share/rdock-2013.1-1/data/scripts/dock.prm

>  <Rbt.Receptor>
receptor.prm

>  <SCORE>
5.97902

>  <SCORE.INTER>
11.4

>  <SCORE.INTER.CONST>
1

>  <SCORE.INTER.POLAR>
0

>  <SCORE.INTER.REPUL>
0

>  <SCORE.INTER.ROT>
6

>  <SCORE.INTER.VDW>
0

>  <SCORE.INTER.norm>
0.407143

>  <SCORE.INTRA>
-5.42098

>  <SCORE.INTRA.DIHEDRAL>
0.270241

>  <SCORE.INTRA.DIHEDRAL.0>
4.05898

>  <SCORE.INTRA.POLAR>
0

>  <SCORE.INTRA.POLAR.0>
0

>  <SCORE.INTRA.REPUL>
0

>  <SCORE.INTRA.REPUL.0>
0

>  <SCORE.INTRA.VDW>
-5.55611

>  <SCORE.INTRA.VDW.0>
-1.51228

>  <SCORE.INTRA.norm>
-0.193607

>  <SCORE.RESTR>


>  <SCORE.RESTR.norm>
0

>  <SCORE.SYSTEM>
0

>  <SCORE.SYSTEM.CONST>
0

>  <SCORE.SYSTEM.DIHEDRAL>
0

>  <SCORE.SYSTEM.norm>
0

>  <SCORE.heavy>
28

>  <SCORE.norm>
0.213536

>  <TransFSReceptor>
receptor

>  <TransFSScore>
0.000102

$$$$

 OpenBabel01192115203D
libRbt.so/2013.1/901 2013/11/27
 19 21  0  0  0  0  0  0  0  0999 V2000
  205.4847  189.1488  237.6843 C   0  0  0  0  0  0  0  0  0  0  0  0
  206.5028  188.3158  238.4819 C   0  0  0  0  0  0  0  0  0  0  0  0
  206.9753  189.0447  239.6136 O   0  0  0  0  0  0  0  0  0  0  0  0
  208.2057  189.6535  239.1643 C   0  0  0  0  0  0  0  0  0  0  0  0
  208.7693  188.6241  238.2164 C   0  0  1  0  0  0  0  0  0  0  0  0
  207.5934  188.0047  237.6399 O   0  0  0  0  0  0  0  0  0  0  0  0
  209.8386  188.9577  237.1169 C   0  0  1  0  0  0  0  0  0  0  0  0
  211.1150  189.3967  237.8441 C   0  0  1  0  0  0  0  0  0  0  0  0
  211.9360  188.1231  237.7672 C   0  0  2  0  0  0  0  0  0  0  0  0
  211.7317  187.7529  236.3378 C   0  0  2  0  0  0  0  0  0  0  0  0
  210.2732  187.9010  236.1869 O   0  0  0  0  0  0  0  0  0  0  0  0
  212.2492  186.4187  236.3296 O   0  0  0  0  0  0  0  0  0  0  0  0
  211.5903  185.8400  237.4517 C   0  0  0  0  0  0  0  0  0  0  0  0
  211.3422  186.9333  238.3812 O   0  0  0  0  0  0  0  0  0  0  0  0
  210.3676  185.1512  236.8188 C   0  0  0  0  0  0  0  0  0  0  0  0
  212.3797  184.8095  238.2402 C   0  0  0  0  0  0  0  0  0  0  0  0
  211.7868  190.5161  237.0816 N   0  0  0  0  0  0  0  0  0  0  0  0
  211.8789  191.5496  237.7523 O   0  0  0  0  0  0  0  0  0  0  0  0
  205.8330  187.0015  238.8810 C   0  0  0  0  0  0  0  0  0  0  0  0
  1  2  1  0  0  0  0
  2  6  1  0  0  0  0
  2  3  1  0  0  0  0
  2 19  1  0  0  0  0
  3  4  1  0  0  0  0
  5  4  1  6  0  0  0
  5  6  1  0  0  0  0
  5  7  1  0  0  0  0
  7 11  1  1  0  0  0
  7  8  1  0  0  0  0
  8  9  1  0  0  0  0
  8 17  1  6  0  0  0
  9 14  1  1  0  0  0
  9 10  1  0  0  0  0
 10 11  1  1  0  0  0
 10 12  1  0  0  0  0
 12 13  1  0  0  0  0
 13 14  1  0  0  0  0
 13 15  1  0  0  0  0
 13 16  1  0  0  0  0
 17 18  2  0  0  0  0
M  END
>  <CHROM.1>
64.38761080,119.58255736,209.76896032,188.05319740,237.73689912,2.86198865
0.23167685,0.05188971

>  <Name>


>  <RI>
0

>  <Rbt.Current_Directory>
/data/dnb03/galaxy_db/job_working_directory/014/442/14442372/working

>  <Rbt.Executable>
rbdock ($Id: //depot/dev/client3/rdock/2013.1/src/exe/rbdock.cxx#4 $)

>  <Rbt.Library>
libRbt.so (2013.1, Build901 2013/11/27)

>  <Rbt.Parameter_File>
/usr/local/tools/_conda/envs/__rdock@2013.1-0/share/rdock-2013.1-1/data/scripts/dock.prm

>  <Rbt.Receptor>
receptor.prm

>  <SCORE>
6.13803

>  <SCORE.INTER>
7.4

>  <SCORE.INTER.CONST>
1

>  <SCORE.INTER.POLAR>
0

>  <SCORE.INTER.REPUL>
0

>  <SCORE.INTER.ROT>
2

>  <SCORE.INTER.VDW>
0

>  <SCORE.INTER.norm>
0.389474

>  <SCORE.INTRA>
-1.26197

>  <SCORE.INTRA.DIHEDRAL>
-2.896

>  <SCORE.INTRA.DIHEDRAL.0>
3.09998

>  <SCORE.INTRA.POLAR>
0

>  <SCORE.INTRA.POLAR.0>
0

>  <SCORE.INTRA.REPUL>
0

>  <SCORE.INTRA.REPUL.0>
0

>  <SCORE.INTRA.VDW>
0.186029

>  <SCORE.INTRA.VDW.0>
-1.43619

>  <SCORE.INTRA.norm>
-0.0664195

>  <SCORE.RESTR>


>  <SCORE.RESTR.norm>
0

>  <SCORE.SYSTEM>
0

>  <SCORE.SYSTEM.CONST>
0

>  <SCORE.SYSTEM.DIHEDRAL>
0

>  <SCORE.SYSTEM.norm>
0

>  <SCORE.heavy>
19

>  <SCORE.norm>
0.323054

>  <TransFSReceptor>
receptor

>  <TransFSScore>
0.027466

$$$$

 OpenBabel01192115203D
libRbt.so/2013.1/901 2013/11/27
 20 19  0  0  0  0  0  0  0  0999 V2000
  217.4548  181.5004  241.1290 C   0  0  0  0  0  0  0  0  0  0  0  0
  216.4966  182.3551  241.9650 C   0  0  1  0  0  0  0  0  0  0  0  0
  215.2161  181.5744  242.2977 C   0  0  0  0  0  0  0  0  0  0  0  0
  214.2254  181.5541  241.5804 O   0  0  0  0  0  0  0  0  0  0  0  0
  215.2685  180.8977  243.4691 O   0  0  0  0  0  0  0  0  0  0  0  0
  217.1712  182.7404  243.2335 N   0  0  0  0  0  0  0  0  0  0  0  0
  219.1124  182.2562  240.9530 S   0  0  0  0  0  0  0  0  0  0  0  0
  218.6440  184.1345  240.2662 S   0  0  0  0  0  0  0  0  0  0  0  0
  220.0054  185.1957  240.8945 C   0  0  0  0  0  0  0  0  0  0  0  0
  220.0034  185.4806  242.3999 C   0  0  1  0  0  0  0  0  0  0  0  0
  218.7541  186.2739  242.8008 C   0  0  0  0  0  0  0  0  0  0  0  0
  218.7359  187.4912  242.9313 O   0  0  0  0  0  0  0  0  0  0  0  0
  217.6516  185.5124  242.9859 O   0  0  0  0  0  0  0  0  0  0  0  0
  220.0272  184.1914  243.1419 N   0  0  0  0  0  0  0  0  0  0  0  0
  214.4546  180.4016  243.6855 H   0  0  0  0  0  0  0  0  0  0  0  0
  216.6227  182.3502  244.0107 H   0  0  0  0  0  0  0  0  0  0  0  0
  217.0747  183.7501  243.3635 H   0  0  0  0  0  0  0  0  0  0  0  0
  216.8513  186.0189  243.2325 H   0  0  0  0  0  0  0  0  0  0  0  0
  219.0585  183.8630  243.2262 H   0  0  0  0  0  0  0  0  0  0  0  0
  220.2974  184.3812  244.1104 H   0  0  0  0  0  0  0  0  0  0  0  0
  1  7  1  0  0  0  0
  2  1  1  6  0  0  0
  2  3  1  0  0  0  0
  2  6  1  0  0  0  0
  3  4  2  0  0  0  0
  3  5  1  0  0  0  0
  5 15  1  0  0  0  0
  6 16  1  0  0  0  0
  6 17  1  0  0  0  0
  7  8  1  0  0  0  0
  8  9  1  0  0  0  0
 10  9  1  6  0  0  0
 10 11  1  0  0  0  0
 10 14  1  0  0  0  0
 11 12  2  0  0  0  0
 11 13  1  0  0  0  0
 13 18  1  0  0  0  0
 14 19  1  0  0  0  0
 14 20  1  0  0  0  0
M  END
>  <CHROM.1>
-169.73769929,-52.50213737,-88.46690894,-118.89475193,179.84042882,150.60699222
-72.14411971,-63.64609686,-96.88747648,-85.06913604,-179.38422396,217.89238652
183.58058664,241.96469085,-2.45704484,0.55867075,0.55530771

>  <Name>


>  <RI>
0

>  <Rbt.Current_Directory>
/data/dnb03/galaxy_db/job_working_directory/014/442/14442374/working

>  <Rbt.Executable>
rbdock ($Id: //depot/dev/client3/rdock/2013.1/src/exe/rbdock.cxx#4 $)

>  <Rbt.Library>
libRbt.so (2013.1, Build901 2013/11/27)

>  <Rbt.Parameter_File>
/usr/local/tools/_conda/envs/__rdock@2013.1-0/share/rdock-2013.1-1/data/scripts/dock.prm

>  <Rbt.Receptor>
receptor.prm

>  <SCORE>
8.07681

>  <SCORE.INTER>
14.4

>  <SCORE.INTER.CONST>
1

>  <SCORE.INTER.POLAR>
0

>  <SCORE.INTER.REPUL>
0

>  <SCORE.INTER.ROT>
9

>  <SCORE.INTER.VDW>
0

>  <SCORE.INTER.norm>
1.02857

>  <SCORE.INTRA>
-6.32319

>  <SCORE.INTRA.DIHEDRAL>
6.51207

>  <SCORE.INTRA.DIHEDRAL.0>
4.07244

>  <SCORE.INTRA.POLAR>
-2.49459

>  <SCORE.INTRA.POLAR.0>
0

>  <SCORE.INTRA.REPUL>
0

>  <SCORE.INTRA.REPUL.0>
0

>  <SCORE.INTRA.VDW>
-1.09761

>  <SCORE.INTRA.VDW.0>
-2.37715

>  <SCORE.INTRA.norm>
-0.451657

>  <SCORE.RESTR>


>  <SCORE.RESTR.norm>
0

>  <SCORE.SYSTEM>
0

>  <SCORE.SYSTEM.CONST>
0

>  <SCORE.SYSTEM.DIHEDRAL>
0

>  <SCORE.SYSTEM.norm>
0

>  <SCORE.heavy>
14

>  <SCORE.norm>
0.576915

>  <TransFSReceptor>
receptor

>  <TransFSScore>
0.042307

$$$$

 OpenBabel01192115203D
libRbt.so/2013.1/901 2013/11/27
 17 19  0  0  0  0  0  0  0  0999 V2000
  208.2674  196.9838  248.5217 C   0  0  0  0  0  0  0  0  0  0  0  0
  208.3762  196.8336  246.9854 C   0  0  0  0  0  0  0  0  0  0  0  0
  208.2285  198.3961  247.0554 C   0  0  0  0  0  0  0  0  0  0  0  0
  208.1953  199.3400  246.3008 O   0  0  0  0  0  0  0  0  0  0  0  0
  208.1168  198.4184  248.4095 O   0  0  0  0  0  0  0  0  0  0  0  0
  209.7503  196.3575  246.3296 C   0  0  0  0  0  0  0  0  0  0  0  0
  210.3954  197.0749  245.2999 C   0  0  0  0  0  0  0  0  0  0  0  0
  211.4440  196.5243  244.5580 C   0  0  0  0  0  0  0  0  0  0  0  0
  211.8931  195.2389  244.8359 C   0  0  0  0  0  0  0  0  0  0  0  0
  211.3427  194.5339  245.8989 C   0  0  0  0  0  0  0  0  0  0  0  0
  210.3032  195.0957  246.6439 C   0  0  0  0  0  0  0  0  0  0  0  0
  207.1714  196.1206  246.1990 C   0  0  0  0  0  0  0  0  0  0  0  0
  206.7775  194.7969  246.5069 C   0  0  0  0  0  0  0  0  0  0  0  0
  205.7753  194.1275  245.7967 C   0  0  0  0  0  0  0  0  0  0  0  0
  205.1252  194.7645  244.7479 C   0  0  0  0  0  0  0  0  0  0  0  0
  205.4859  196.0621  244.4062 C   0  0  0  0  0  0  0  0  0  0  0  0
  206.4947  196.7216  245.1164 C   0  0  0  0  0  0  0  0  0  0  0  0
  1  5  1  0  0  0  0
  1  2  1  0  0  0  0
  2  3  1  0  0  0  0
  2  6  1  0  0  0  0
  2 12  1  0  0  0  0
  3  4  2  0  0  0  0
  3  5  1  0  0  0  0
  6 11  1  0  0  0  0
  6  7  2  0  0  0  0
  7  8  1  0  0  0  0
  8  9  2  0  0  0  0
  9 10  1  0  0  0  0
 10 11  2  0  0  0  0
 12 17  1  0  0  0  0
 12 13  2  0  0  0  0
 13 14  1  0  0  0  0
 14 15  2  0  0  0  0
 15 16  1  0  0  0  0
 16 17  2  0  0  0  0
M  END
>  <CHROM.1>
-126.89084072,-58.63220848,208.41314938,196.37721602,246.12941046,3.07037667
-0.02441911,-2.57322351

>  <Name>


>  <RI>
0

>  <Rbt.Current_Directory>
/data/dnb03/galaxy_db/job_working_directory/014/442/14442375/working

>  <Rbt.Executable>
rbdock ($Id: //depot/dev/client3/rdock/2013.1/src/exe/rbdock.cxx#4 $)

>  <Rbt.Library>
libRbt.so (2013.1, Build901 2013/11/27)

>  <Rbt.Parameter_File>
/usr/local/tools/_conda/envs/__rdock@2013.1-0/share/rdock-2013.1-1/data/scripts/dock.prm

>  <Rbt.Receptor>
receptor.prm

>  <SCORE>
7.36781

>  <SCORE.INTER>
7.4

>  <SCORE.INTER.CONST>
1

>  <SCORE.INTER.POLAR>
0

>  <SCORE.INTER.REPUL>
0

>  <SCORE.INTER.ROT>
2

>  <SCORE.INTER.VDW>
0

>  <SCORE.INTER.norm>
0.435294

>  <SCORE.INTRA>
-0.0321869

>  <SCORE.INTRA.DIHEDRAL>
-0.00883128

>  <SCORE.INTRA.DIHEDRAL.0>
1.60469

>  <SCORE.INTRA.POLAR>
0

>  <SCORE.INTRA.POLAR.0>
0

>  <SCORE.INTRA.REPUL>
0

>  <SCORE.INTRA.REPUL.0>
0

>  <SCORE.INTRA.VDW>
-0.0277713

>  <SCORE.INTRA.VDW.0>
-2.29867

>  <SCORE.INTRA.norm>
-0.00189335

>  <SCORE.RESTR>


>  <SCORE.RESTR.norm>
0

>  <SCORE.SYSTEM>
0

>  <SCORE.SYSTEM.CONST>
0

>  <SCORE.SYSTEM.DIHEDRAL>
0

>  <SCORE.SYSTEM.norm>
0

>  <SCORE.heavy>
17

>  <SCORE.norm>
0.433401

>  <TransFSReceptor>
receptor

>  <TransFSScore>
0.188349

$$$$

 OpenBabel01192115203D
libRbt.so/2013.1/901 2013/11/27
 15 15  0  0  0  0  0  0  0  0999 V2000
  220.9708  180.5900  242.8545 C   0  0  0  0  0  0  0  0  0  0  0  0
  220.0212  179.5847  242.6833 C   0  0  0  0  0  0  0  0  0  0  0  0
  218.8963  179.5310  243.5113 C   0  0  0  0  0  0  0  0  0  0  0  0
  218.7161  180.4797  244.5274 C   0  0  0  0  0  0  0  0  0  0  0  0
  219.6872  181.4783  244.6964 C   0  0  0  0  0  0  0  0  0  0  0  0
  220.8057  181.5349  243.8633 C   0  0  0  0  0  0  0  0  0  0  0  0
  217.4552  180.5160  245.3630 C   0  0  0  0  0  0  0  0  0  0  0  0
  216.6207  181.8027  245.2642 C   0  0  1  0  0  0  0  0  0  0  0  0
  216.1867  182.0738  243.8161 C   0  0  0  0  0  0  0  0  0  0  0  0
  215.1543  181.5773  243.3510 O   0  0  0  0  0  0  0  0  0  0  0  0
  217.0467  183.0056  242.9977 C   0  0  0  0  0  0  0  0  0  0  0  0
  217.8143  182.0954  241.6810 Cl  0  0  0  0  0  0  0  0  0  0  0  0
  215.4012  181.6538  246.0927 N   0  0  0  0  0  0  0  0  0  0  0  0
  214.8668  182.5262  246.0280 H   0  0  0  0  0  0  0  0  0  0  0  0
  215.6685  181.5791  247.0757 H   0  0  0  0  0  0  0  0  0  0  0  0
  1  6  1  0  0  0  0
  1  2  2  0  0  0  0
  2  3  1  0  0  0  0
  3  4  2  0  0  0  0
  4  5  1  0  0  0  0
  4  7  1  0  0  0  0
  5  6  2  0  0  0  0
  8  7  1  6  0  0  0
  8  9  1  0  0  0  0
  8 13  1  0  0  0  0
  9 10  2  0  0  0  0
  9 11  1  0  0  0  0
 11 12  1  0  0  0  0
 13 14  1  0  0  0  0
 13 15  1  0  0  0  0
M  END
>  <CHROM.1>
-118.10411709,58.41475603,86.64288364,178.98793423,113.50448676,217.94422872
181.34450080,243.67809310,-0.21076876,-0.35345653,1.89911173

>  <Name>


>  <RI>
0

>  <Rbt.Current_Directory>
/data/dnb03/galaxy_db/job_working_directory/014/442/14442377/working

>  <Rbt.Executable>
rbdock ($Id: //depot/dev/client3/rdock/2013.1/src/exe/rbdock.cxx#4 $)

>  <Rbt.Library>
libRbt.so (2013.1, Build901 2013/11/27)

>  <Rbt.Parameter_File>
/usr/local/tools/_conda/envs/__rdock@2013.1-0/share/rdock-2013.1-1/data/scripts/dock.prm

>  <Rbt.Receptor>
receptor.prm

>  <SCORE>
9.01005

>  <SCORE.INTER>
10.4

>  <SCORE.INTER.CONST>
1

>  <SCORE.INTER.POLAR>
0

>  <SCORE.INTER.REPUL>
0

>  <SCORE.INTER.ROT>
5

>  <SCORE.INTER.VDW>
0

>  <SCORE.INTER.norm>
0.8

>  <SCORE.INTRA>
-1.38995

>  <SCORE.INTRA.DIHEDRAL>
-0.745756

>  <SCORE.INTRA.DIHEDRAL.0>
4.6359

>  <SCORE.INTRA.POLAR>
0

>  <SCORE.INTRA.POLAR.0>
0

>  <SCORE.INTRA.REPUL>
0

>  <SCORE.INTRA.REPUL.0>
0

>  <SCORE.INTRA.VDW>
-1.01707

>  <SCORE.INTRA.VDW.0>
-2.04828

>  <SCORE.INTRA.norm>
-0.106919

>  <SCORE.RESTR>


>  <SCORE.RESTR.norm>
0

>  <SCORE.SYSTEM>
0

>  <SCORE.SYSTEM.CONST>
0

>  <SCORE.SYSTEM.DIHEDRAL>
0

>  <SCORE.SYSTEM.norm>
0

>  <SCORE.heavy>
13

>  <SCORE.norm>
0.693081

>  <TransFSReceptor>
receptor

>  <TransFSScore>
0.175805

$$$$

 OpenBabel01192115203D
libRbt.so/2013.1/901 2013/11/27
 27 28  0  0  0  0  0  0  0  0999 V2000
  190.3336  213.9821  252.0564 C   0  0  0  0  0  0  0  0  0  0  0  0
  191.7923  214.3972  251.9723 N   0  3  0  0  0  0  0  0  0  0  0  0
  191.8815  215.2650  252.5110 H   0  0  0  0  0  0  0  0  0  0  0  0
  192.6658  213.3797  252.6460 C   0  0  0  0  0  0  0  0  0  0  0  0
  192.2360  214.6391  250.5528 C   0  0  0  0  0  0  0  0  0  0  0  0
  193.5630  215.3889  250.4839 C   0  0  0  0  0  0  0  0  0  0  0  0
  193.4607  216.9260  250.3905 C   0  0  0  0  0  0  0  0  0  0  0  0
  193.0493  217.6384  251.7086 C   0  0  1  0  0  0  0  0  0  0  0  0
  193.5964  219.0634  251.8696 C   0  0  0  0  0  0  0  0  0  0  0  0
  192.9740  220.1276  251.1803 C   0  0  0  0  0  0  0  0  0  0  0  0
  193.6248  221.3414  250.9934 C   0  0  0  0  0  0  0  0  0  0  0  0
  194.8815  221.5376  251.5457 C   0  0  0  0  0  0  0  0  0  0  0  0
  195.4493  220.5486  252.3509 C   0  0  0  0  0  0  0  0  0  0  0  0
  194.7968  219.3240  252.5702 C   0  0  0  0  0  0  0  0  0  0  0  0
  195.5701  218.1054  253.6302 S   0  0  0  0  0  0  0  0  0  0  0  0
  194.2768  217.3300  254.6021 C   0  0  0  0  0  0  0  0  0  0  0  0
  193.5590  218.1604  255.4822 C   0  0  0  0  0  0  0  0  0  0  0  0
  192.5074  217.6604  256.2619 C   0  0  0  0  0  0  0  0  0  0  0  0
  192.1576  216.3184  256.1672 C   0  0  0  0  0  0  0  0  0  0  0  0
  192.8713  215.4722  255.3227 C   0  0  0  0  0  0  0  0  0  0  0  0
  193.9343  215.9730  254.5575 C   0  0  0  0  0  0  0  0  0  0  0  0
  190.8447  215.7039  257.0923 Cl  0  0  0  0  0  0  0  0  0  0  0  0
  191.5508  217.5100  251.8854 C   0  0  0  0  0  0  0  0  0  0  0  0
  190.7582  217.7820  250.9780 O   0  0  0  0  0  0  0  0  0  0  0  0
  191.0739  217.2059  253.1303 N   0  0  0  0  0  0  0  0  0  0  0  0
  190.2254  216.6786  253.2643 H   0  0  0  0  0  0  0  0  0  0  0  0
  191.3790  217.7999  253.8962 H   0  0  0  0  0  0  0  0  0  0  0  0
  1  2  1  0  0  0  0
  2  3  1  0  0  0  0
  2  4  1  0  0  0  0
  2  5  1  0  0  0  0
  5  6  1  0  0  0  0
  6  7  1  0  0  0  0
  8  7  1  6  0  0  0
  8  9  1  0  0  0  0
  8 23  1  0  0  0  0
  9 14  1  0  0  0  0
  9 10  2  0  0  0  0
 10 11  1  0  0  0  0
 11 12  2  0  0  0  0
 12 13  1  0  0  0  0
 13 14  2  0  0  0  0
 14 15  1  0  0  0  0
 15 16  1  0  0  0  0
 16 21  1  0  0  0  0
 16 17  2  0  0  0  0
 17 18  1  0  0  0  0
 18 19  2  0  0  0  0
 19 20  1  0  0  0  0
 19 22  1  0  0  0  0
 20 21  2  0  0  0  0
 23 24  2  0  0  0  0
 23 25  1  0  0  0  0
 25 26  1  0  0  0  0
 25 27  1  0  0  0  0
M  CHG  1   2   1
M  END
>  <CHROM.1>
165.33035530,-92.29100199,73.85188679,150.68353590,78.44833621,-49.29705102
-43.37330823,-62.78829833,-149.31470440,192.92285709,217.18265092,253.14221095
2.61401771,1.03614789,1.55955176

>  <Name>


>  <RI>
0

>  <Rbt.Current_Directory>
/data/dnb03/galaxy_db/job_working_directory/014/442/14442379/working

>  <Rbt.Executable>
rbdock ($Id: //depot/dev/client3/rdock/2013.1/src/exe/rbdock.cxx#4 $)

>  <Rbt.Library>
libRbt.so (2013.1, Build901 2013/11/27)

>  <Rbt.Parameter_File>
/usr/local/tools/_conda/envs/__rdock@2013.1-0/share/rdock-2013.1-1/data/scripts/dock.prm

>  <Rbt.Receptor>
receptor.prm

>  <SCORE>
8.15209

>  <SCORE.INTER>
14.4

>  <SCORE.INTER.CONST>
1

>  <SCORE.INTER.POLAR>
0

>  <SCORE.INTER.REPUL>
0

>  <SCORE.INTER.ROT>
9

>  <SCORE.INTER.VDW>
0

>  <SCORE.INTER.norm>
0.6

>  <SCORE.INTRA>
-6.24791

>  <SCORE.INTRA.DIHEDRAL>
6.67653

>  <SCORE.INTRA.DIHEDRAL.0>
7.61164

>  <SCORE.INTRA.POLAR>
-1.49956

>  <SCORE.INTRA.POLAR.0>
0

>  <SCORE.INTRA.REPUL>
0

>  <SCORE.INTRA.REPUL.0>
0

>  <SCORE.INTRA.VDW>
-4.48766

>  <SCORE.INTRA.VDW.0>
-1.69731

>  <SCORE.INTRA.norm>
-0.26033

>  <SCORE.RESTR>


>  <SCORE.RESTR.norm>
0

>  <SCORE.SYSTEM>
0

>  <SCORE.SYSTEM.CONST>
0

>  <SCORE.SYSTEM.DIHEDRAL>
0

>  <SCORE.SYSTEM.norm>
0

>  <SCORE.heavy>
24

>  <SCORE.norm>
0.33967

>  <TransFSReceptor>
receptor

>  <TransFSScore>
0.000265

$$$$

 OpenBabel01192115203D
libRbt.so/2013.1/901 2013/11/27
 15 15  0  0  0  0  0  0  0  0999 V2000
  203.0927  205.7204  248.7163 C   0  0  0  0  0  0  0  0  0  0  0  0
  203.7097  206.7528  249.4227 C   0  0  0  0  0  0  0  0  0  0  0  0
  203.1139  207.2527  250.5824 C   0  0  0  0  0  0  0  0  0  0  0  0
  201.8937  206.7485  251.0491 C   0  0  0  0  0  0  0  0  0  0  0  0
  201.2887  205.7046  250.3320 C   0  0  0  0  0  0  0  0  0  0  0  0
  201.8892  205.2023  249.1805 C   0  0  0  0  0  0  0  0  0  0  0  0
  201.2504  204.1941  248.5229 O   0  0  0  0  0  0  0  0  0  0  0  0
  201.2027  207.3257  252.2655 C   0  0  0  0  0  0  0  0  0  0  0  0
  201.7496  206.8807  253.6033 C   0  0  0  0  0  0  0  0  0  0  0  0
  201.1201  206.1781  254.3823 O   0  0  0  0  0  0  0  0  0  0  0  0
  202.9660  207.3800  253.9252 O   0  0  0  0  0  0  0  0  0  0  0  0
  203.7292  208.2447  251.2894 O   0  0  0  0  0  0  0  0  0  0  0  0
  201.7641  203.9545  247.7340 H   0  0  0  0  0  0  0  0  0  0  0  0
  203.3579  207.9257  253.2159 H   0  0  0  0  0  0  0  0  0  0  0  0
  204.5595  208.4866  250.8443 H   0  0  0  0  0  0  0  0  0  0  0  0
  1  6  1  0  0  0  0
  1  2  2  0  0  0  0
  2  3  1  0  0  0  0
  3  4  2  0  0  0  0
  3 12  1  0  0  0  0
  4  5  1  0  0  0  0
  4  8  1  0  0  0  0
  5  6  2  0  0  0  0
  6  7  1  0  0  0  0
  7 13  1  0  0  0  0
  8  9  1  0  0  0  0
  9 10  2  0  0  0  0
  9 11  1  0  0  0  0
 11 14  1  0  0  0  0
 12 15  1  0  0  0  0
M  END
>  <CHROM.1>
0.48495318,-79.18610531,-0.77315853,-112.66525063,-3.57960460,202.26503125
206.47743070,251.16935276,-1.53926513,0.72064638,1.18604190

>  <Name>


>  <RI>
0

>  <Rbt.Current_Directory>
/data/dnb03/galaxy_db/job_working_directory/014/442/14442380/working

>  <Rbt.Executable>
rbdock ($Id: //depot/dev/client3/rdock/2013.1/src/exe/rbdock.cxx#4 $)

>  <Rbt.Library>
libRbt.so (2013.1, Build901 2013/11/27)

>  <Rbt.Parameter_File>
/usr/local/tools/_conda/envs/__rdock@2013.1-0/share/rdock-2013.1-1/data/scripts/dock.prm

>  <Rbt.Receptor>
receptor.prm

>  <SCORE>
3.56552

>  <SCORE.INTER>
7.4

>  <SCORE.INTER.CONST>
1

>  <SCORE.INTER.POLAR>
0

>  <SCORE.INTER.REPUL>
0

>  <SCORE.INTER.ROT>
2

>  <SCORE.INTER.VDW>
0

>  <SCORE.INTER.norm>
0.616667

>  <SCORE.INTRA>
-3.83448

>  <SCORE.INTRA.DIHEDRAL>
0.0705252

>  <SCORE.INTRA.DIHEDRAL.0>
2.04155

>  <SCORE.INTRA.POLAR>
-1

>  <SCORE.INTRA.POLAR.0>
0

>  <SCORE.INTRA.REPUL>
0

>  <SCORE.INTRA.REPUL.0>
0

>  <SCORE.INTRA.VDW>
-0.469741

>  <SCORE.INTRA.VDW.0>
0.584252

>  <SCORE.INTRA.norm>
-0.31954

>  <SCORE.RESTR>


>  <SCORE.RESTR.norm>
0

>  <SCORE.SYSTEM>
0

>  <SCORE.SYSTEM.CONST>
0

>  <SCORE.SYSTEM.DIHEDRAL>
0

>  <SCORE.SYSTEM.norm>
0

>  <SCORE.heavy>
12

>  <SCORE.norm>
0.297127

>  <TransFSReceptor>
receptor

>  <TransFSScore>
0.002959

$$$$

 OpenBabel01192115203D
libRbt.so/2013.1/901 2013/11/27
 27 29  0  0  0  0  0  0  0  0999 V2000
  216.6373  186.1047  250.4527 C   0  0  0  0  0  0  0  0  0  0  0  0
  215.8864  185.9523  251.7181 C   0  0  0  0  0  0  0  0  0  0  0  0
  215.3625  184.8810  252.4194 C   0  0  0  0  0  0  0  0  0  0  0  0
  214.7150  185.4337  253.5501 C   0  0  0  0  0  0  0  0  0  0  0  0
  214.9088  186.7940  253.4865 C   0  0  0  0  0  0  0  0  0  0  0  0
  215.6097  187.1171  252.3739 O   0  0  0  0  0  0  0  0  0  0  0  0
  215.4974  183.4399  252.0293 C   0  0  0  0  0  0  0  0  0  0  0  0
  216.1665  183.0249  250.9651 N   0  0  0  0  0  0  0  0  0  0  0  0
  216.1391  181.6532  250.9326 N   0  0  0  0  0  0  0  0  0  0  0  0
  215.4360  181.2525  251.9671 C   0  0  0  0  0  0  0  0  0  0  0  0
  215.0201  182.3345  252.7329 N   0  0  0  0  0  0  0  0  0  0  0  0
  214.2260  182.3794  253.8610 N   0  0  0  0  0  0  0  0  0  0  0  0
  214.2982  181.3464  254.6375 C   0  0  0  0  0  0  0  0  0  0  0  0
  213.4776  181.2430  255.8604 C   0  0  0  0  0  0  0  0  0  0  0  0
  213.6179  180.1024  256.6547 C   0  0  0  0  0  0  0  0  0  0  0  0
  212.9187  180.0255  257.8542 C   0  0  0  0  0  0  0  0  0  0  0  0
  212.0725  181.0564  258.2493 C   0  0  0  0  0  0  0  0  0  0  0  0
  211.9008  182.1766  257.4411 C   0  0  0  0  0  0  0  0  0  0  0  0
  212.6085  182.2746  256.2399 C   0  0  0  0  0  0  0  0  0  0  0  0
  211.4216  180.9829  259.4178 F   0  0  0  0  0  0  0  0  0  0  0  0
  213.0839  178.9513  258.6378 F   0  0  0  0  0  0  0  0  0  0  0  0
  215.0248  179.5976  252.2900 S   0  0  0  0  0  0  0  0  0  0  0  0
  216.0806  178.7112  251.1184 C   0  0  0  0  0  0  0  0  0  0  0  0
  217.5172  178.6622  251.5806 C   0  0  0  0  0  0  0  0  0  0  0  0
  218.0263  177.6869  252.1169 O   0  0  0  0  0  0  0  0  0  0  0  0
  218.2068  179.8081  251.3792 O   0  0  0  0  0  0  0  0  0  0  0  0
  217.6861  180.5327  250.9622 H   0  0  0  0  0  0  0  0  0  0  0  0
  1  2  1  0  0  0  0
  2  6  1  0  0  0  0
  2  3  2  0  0  0  0
  3  4  1  0  0  0  0
  3  7  1  0  0  0  0
  4  5  2  0  0  0  0
  5  6  1  0  0  0  0
  7 11  1  0  0  0  0
  7  8  2  0  0  0  0
  8  9  1  0  0  0  0
  9 10  2  0  0  0  0
 10 11  1  0  0  0  0
 10 22  1  0  0  0  0
 11 12  1  0  0  0  0
 12 13  2  0  0  0  0
 13 14  1  0  0  0  0
 14 19  1  0  0  0  0
 14 15  2  0  0  0  0
 15 16  1  0  0  0  0
 16 17  2  0  0  0  0
 16 21  1  0  0  0  0
 17 18  1  0  0  0  0
 17 20  1  0  0  0  0
 18 19  2  0  0  0  0
 22 23  1  0  0  0  0
 23 24  1  0  0  0  0
 24 25  2  0  0  0  0
 24 26  1  0  0  0  0
 26 27  1  0  0  0  0
M  END
>  <CHROM.1>
1.36589790,11.72884181,-155.05338454,-179.49557144,76.27588429,100.62516676
0.37715484,214.85357873,181.84952204,253.83233176,0.54843384,0.97858836,-0.23863336

>  <Name>


>  <RI>
0

>  <Rbt.Current_Directory>
/data/dnb03/galaxy_db/job_working_directory/014/442/14442381/working

>  <Rbt.Executable>
rbdock ($Id: //depot/dev/client3/rdock/2013.1/src/exe/rbdock.cxx#4 $)

>  <Rbt.Library>
libRbt.so (2013.1, Build901 2013/11/27)

>  <Rbt.Parameter_File>
/usr/local/tools/_conda/envs/__rdock@2013.1-0/share/rdock-2013.1-1/data/scripts/dock.prm

>  <Rbt.Receptor>
receptor.prm

>  <SCORE>
8.94019

>  <SCORE.INTER>
11.4

>  <SCORE.INTER.CONST>
1

>  <SCORE.INTER.POLAR>
0

>  <SCORE.INTER.REPUL>
0

>  <SCORE.INTER.ROT>
6

>  <SCORE.INTER.VDW>
0

>  <SCORE.INTER.norm>
0.438462

>  <SCORE.INTRA>
-2.45981

>  <SCORE.INTRA.DIHEDRAL>
-4.1605

>  <SCORE.INTRA.DIHEDRAL.0>
7.46378

>  <SCORE.INTRA.POLAR>
-0.369065

>  <SCORE.INTRA.POLAR.0>
-0.630935

>  <SCORE.INTRA.REPUL>
0

>  <SCORE.INTRA.REPUL.0>
0

>  <SCORE.INTRA.VDW>
0.875256

>  <SCORE.INTRA.VDW.0>
-2.0538

>  <SCORE.INTRA.norm>
-0.0946082

>  <SCORE.RESTR>


>  <SCORE.RESTR.norm>
0

>  <SCORE.SYSTEM>
0

>  <SCORE.SYSTEM.CONST>
0

>  <SCORE.SYSTEM.DIHEDRAL>
0

>  <SCORE.SYSTEM.norm>
0

>  <SCORE.heavy>
26

>  <SCORE.norm>
0.343853

>  <TransFSReceptor>
receptor

>  <TransFSScore>
0.000014

$$$$

 OpenBabel01192115203D
libRbt.so/2013.1/901 2013/11/27
 24 26  0  0  0  0  0  0  0  0999 V2000
  207.8244  195.6268  251.2760 C   0  0  0  0  0  0  0  0  0  0  0  0
  206.7220  196.0045  250.4468 O   0  0  0  0  0  0  0  0  0  0  0  0
  207.0529  196.1913  249.1318 C   0  0  0  0  0  0  0  0  0  0  0  0
  208.1849  196.0418  248.6876 O   0  0  0  0  0  0  0  0  0  0  0  0
  205.8140  196.5802  248.3189 C   0  0  1  0  0  0  0  0  0  0  0  0
  204.7740  195.4317  248.3370 C   0  0  1  0  0  0  0  0  0  0  0  0
  204.0807  195.3553  249.6946 C   0  0  0  0  0  0  0  0  0  0  0  0
  203.5910  194.1328  250.1761 C   0  0  0  0  0  0  0  0  0  0  0  0
  202.8747  194.0883  251.3691 C   0  0  0  0  0  0  0  0  0  0  0  0
  202.6264  195.2631  252.0786 C   0  0  0  0  0  0  0  0  0  0  0  0
  203.1098  196.4861  251.6086 C   0  0  0  0  0  0  0  0  0  0  0  0
  203.8540  196.5402  250.4291 C   0  0  0  0  0  0  0  0  0  0  0  0
  204.3282  197.8286  249.8982 C   0  0  0  0  0  0  0  0  0  0  0  0
  205.2361  197.8575  248.9021 C   0  0  0  0  0  0  0  0  0  0  0  0
  205.7076  199.1233  248.2819 C   0  0  0  0  0  0  0  0  0  0  0  0
  206.4980  199.1504  247.3503 O   0  0  0  0  0  0  0  0  0  0  0  0
  205.1105  200.2066  248.8397 O   0  0  0  0  0  0  0  0  0  0  0  0
  205.5137  201.4516  248.2678 C   0  0  0  0  0  0  0  0  0  0  0  0
  203.7771  195.5454  247.1727 C   0  0  0  0  0  0  0  0  0  0  0  0
  202.8262  196.5802  247.1097 C   0  0  0  0  0  0  0  0  0  0  0  0
  201.8915  196.6469  246.0786 C   0  0  0  0  0  0  0  0  0  0  0  0
  201.8972  195.6840  245.0776 C   0  0  0  0  0  0  0  0  0  0  0  0
  202.8534  194.6691  245.0983 C   0  0  0  0  0  0  0  0  0  0  0  0
  203.7925  194.6045  246.1325 C   0  0  0  0  0  0  0  0  0  0  0  0
  1  2  1  0  0  0  0
  2  3  1  0  0  0  0
  3  4  2  0  0  0  0
  5  3  1  1  0  0  0
  5 14  1  0  0  0  0
  5  6  1  0  0  0  0
  6  7  1  0  0  0  0
  6 19  1  6  0  0  0
  7 12  1  0  0  0  0
  7  8  2  0  0  0  0
  8  9  1  0  0  0  0
  9 10  2  0  0  0  0
 10 11  1  0  0  0  0
 11 12  2  0  0  0  0
 12 13  1  0  0  0  0
 13 14  2  0  0  0  0
 14 15  1  0  0  0  0
 15 16  2  0  0  0  0
 15 17  1  0  0  0  0
 17 18  1  0  0  0  0
 19 24  1  0  0  0  0
 19 20  2  0  0  0  0
 20 21  1  0  0  0  0
 21 22  2  0  0  0  0
 22 23  1  0  0  0  0
 23 24  2  0  0  0  0
M  END
>  <CHROM.1>
0.56342974,-63.19033528,-68.60696607,0.84182349,-179.17694403,204.67578553
196.61445786,248.75275416,0.01195712,0.79421248,2.24233804

>  <Name>


>  <RI>
0

>  <Rbt.Current_Directory>
/data/dnb03/galaxy_db/job_working_directory/014/442/14442382/working

>  <Rbt.Executable>
rbdock ($Id: //depot/dev/client3/rdock/2013.1/src/exe/rbdock.cxx#4 $)

>  <Rbt.Library>
libRbt.so (2013.1, Build901 2013/11/27)

>  <Rbt.Parameter_File>
/usr/local/tools/_conda/envs/__rdock@2013.1-0/share/rdock-2013.1-1/data/scripts/dock.prm

>  <Rbt.Receptor>
receptor.prm

>  <SCORE>
9.8412

>  <SCORE.INTER>
10.4

>  <SCORE.INTER.CONST>
1

>  <SCORE.INTER.POLAR>
0

>  <SCORE.INTER.REPUL>
0

>  <SCORE.INTER.ROT>
5

>  <SCORE.INTER.VDW>
0

>  <SCORE.INTER.norm>
0.433333

>  <SCORE.INTRA>
-0.558799

>  <SCORE.INTRA.DIHEDRAL>
-0.123492

>  <SCORE.INTRA.DIHEDRAL.0>
1.68191

>  <SCORE.INTRA.POLAR>
0

>  <SCORE.INTRA.POLAR.0>
0

>  <SCORE.INTRA.REPUL>
0

>  <SCORE.INTRA.REPUL.0>
0

>  <SCORE.INTRA.VDW>
-0.497053

>  <SCORE.INTRA.VDW.0>
1.63607

>  <SCORE.INTRA.norm>
-0.0232833

>  <SCORE.RESTR>


>  <SCORE.RESTR.norm>
0

>  <SCORE.SYSTEM>
0

>  <SCORE.SYSTEM.CONST>
0

>  <SCORE.SYSTEM.DIHEDRAL>
0

>  <SCORE.SYSTEM.norm>
0

>  <SCORE.heavy>
24

>  <SCORE.norm>
0.41005

>  <TransFSReceptor>
receptor

>  <TransFSScore>
0.064938

$$$$

 OpenBabel01192115203D
libRbt.so/2013.1/901 2013/11/27
 30 31  0  0  0  0  0  0  0  0999 V2000
  203.1785  216.7443  249.9774 C   0  0  0  0  0  0  0  0  0  0  0  0
  204.5448  217.3529  250.3668 C   0  0  1  0  0  0  0  0  0  0  0  0
  204.5985  218.9011  250.3937 C   0  0  2  0  0  0  0  0  0  0  0  0
  203.8097  219.4006  251.6289 C   0  0  1  0  0  0  0  0  0  0  0  0
  204.3216  218.7166  252.9114 C   0  0  1  0  0  0  0  0  0  0  0  0
  204.4374  217.1905  252.7765 C   0  0  1  0  0  0  0  0  0  0  0  0
  205.0932  216.8022  251.5732 O   0  0  0  0  0  0  0  0  0  0  0  0
  205.2094  216.6671  253.8572 O   0  0  0  0  0  0  0  0  0  0  0  0
  205.6248  219.2754  253.2321 O   0  0  0  0  0  0  0  0  0  0  0  0
  203.9634  220.8260  251.7696 O   0  0  0  0  0  0  0  0  0  0  0  0
  204.1444  219.5486  249.1841 O   0  0  0  0  0  0  0  0  0  0  0  0
  205.1871  219.8578  248.2435 C   0  0  1  0  0  0  0  0  0  0  0  0
  206.1566  220.9043  248.8300 C   0  0  2  0  0  0  0  0  0  0  0  0
  207.1999  220.1748  249.6579 C   0  0  0  0  0  0  0  0  0  0  0  0
  207.4641  220.4700  250.8242 O   0  0  0  0  0  0  0  0  0  0  0  0
  207.8885  219.0291  248.9366 C   0  0  1  0  0  0  0  0  0  0  0  0
  206.7653  218.0502  248.5889 C   0  0  1  0  0  0  0  0  0  0  0  0
  205.8359  218.7072  247.6967 O   0  0  0  0  0  0  0  0  0  0  0  0
  207.3343  216.8209  247.8567 C   0  0  0  0  0  0  0  0  0  0  0  0
  207.8062  217.1753  246.5587 O   0  0  0  0  0  0  0  0  0  0  0  0
  208.5685  219.4790  247.7648 O   0  0  0  0  0  0  0  0  0  0  0  0
  205.4477  221.9366  249.5002 O   0  0  0  0  0  0  0  0  0  0  0  0
  202.7687  217.0768  248.6531 O   0  0  0  0  0  0  0  0  0  0  0  0
  205.2501  215.7039  253.7190 H   0  0  0  0  0  0  0  0  0  0  0  0
  206.2180  219.0761  252.4831 H   0  0  0  0  0  0  0  0  0  0  0  0
  203.4222  221.0899  252.5399 H   0  0  0  0  0  0  0  0  0  0  0  0
  208.4163  217.9299  246.6585 H   0  0  0  0  0  0  0  0  0  0  0  0
  209.2478  220.1311  248.0283 H   0  0  0  0  0  0  0  0  0  0  0  0
  204.9682  221.5021  250.2334 H   0  0  0  0  0  0  0  0  0  0  0  0
  202.8289  218.0465  248.5747 H   0  0  0  0  0  0  0  0  0  0  0  0
  1 23  1  0  0  0  0
  2  1  1  1  0  0  0
  2  7  1  0  0  0  0
  2  3  1  0  0  0  0
  3  4  1  0  0  0  0
  3 11  1  6  0  0  0
  4  5  1  0  0  0  0
  4 10  1  1  0  0  0
  5  6  1  0  0  0  0
  5  9  1  6  0  0  0
  6  7  1  0  0  0  0
  6  8  1  1  0  0  0
  8 24  1  0  0  0  0
  9 25  1  0  0  0  0
 10 26  1  0  0  0  0
 12 11  1  1  0  0  0
 12 18  1  0  0  0  0
 12 13  1  0  0  0  0
 13 14  1  0  0  0  0
 13 22  1  1  0  0  0
 14 15  2  0  0  0  0
 14 16  1  0  0  0  0
 16 17  1  0  0  0  0
 16 21  1  6  0  0  0
 17 18  1  0  0  0  0
 17 19  1  6  0  0  0
 19 20  1  0  0  0  0
 20 27  1  0  0  0  0
 21 28  1  0  0  0  0
 22 29  1  0  0  0  0
 23 30  1  0  0  0  0
M  END
>  <CHROM.1>
62.98425074,-52.04666193,-93.68468766,177.98901153,-61.11711519,-179.89248867
-65.07382432,61.84008249,60.50946911,-68.63314449,52.25692203,205.54396646
218.75029150,250.03652088,2.77541533,0.96973321,0.59972967

>  <Name>


>  <RI>
0

>  <Rbt.Current_Directory>
/data/dnb03/galaxy_db/job_working_directory/014/442/14442383/working

>  <Rbt.Executable>
rbdock ($Id: //depot/dev/client3/rdock/2013.1/src/exe/rbdock.cxx#4 $)

>  <Rbt.Library>
libRbt.so (2013.1, Build901 2013/11/27)

>  <Rbt.Parameter_File>
/usr/local/tools/_conda/envs/__rdock@2013.1-0/share/rdock-2013.1-1/data/scripts/dock.prm

>  <Rbt.Receptor>
receptor.prm

>  <SCORE>
-9.10589

>  <SCORE.INTER>
9.4

>  <SCORE.INTER.CONST>
1

>  <SCORE.INTER.POLAR>
0

>  <SCORE.INTER.REPUL>
0

>  <SCORE.INTER.ROT>
4

>  <SCORE.INTER.VDW>
0

>  <SCORE.INTER.norm>
0.408696

>  <SCORE.INTRA>
-18.5059

>  <SCORE.INTRA.DIHEDRAL>
-16.3864

>  <SCORE.INTRA.DIHEDRAL.0>
22.3934

>  <SCORE.INTRA.POLAR>
-2.32906

>  <SCORE.INTRA.POLAR.0>
-0.158963

>  <SCORE.INTRA.REPUL>
0

>  <SCORE.INTRA.REPUL.0>
0

>  <SCORE.INTRA.VDW>
-2.39389

>  <SCORE.INTRA.VDW.0>
-0.402908

>  <SCORE.INTRA.norm>
-0.804604

>  <SCORE.RESTR>


>  <SCORE.RESTR.norm>
0

>  <SCORE.SYSTEM>
0

>  <SCORE.SYSTEM.CONST>
0

>  <SCORE.SYSTEM.DIHEDRAL>
0

>  <SCORE.SYSTEM.norm>
0

>  <SCORE.heavy>
23

>  <SCORE.norm>
-0.395908

>  <TransFSReceptor>
receptor

>  <TransFSScore>
0.000383

$$$$

 OpenBabel01192115203D
libRbt.so/2013.1/901 2013/11/27
 20 19  0  0  0  0  0  0  0  0999 V2000
  205.2994  202.2620  257.6916 C   0  0  0  0  0  0  0  0  0  0  0  0
  205.9532  202.8869  256.4753 C   0  0  0  0  0  0  0  0  0  0  0  0
  205.9628  201.8838  255.4428 O   0  0  0  0  0  0  0  0  0  0  0  0
  206.5285  202.2681  254.2590 C   0  0  0  0  0  0  0  0  0  0  0  0
  207.0255  203.3661  254.0492 O   0  0  0  0  0  0  0  0  0  0  0  0
  206.5157  201.1286  253.2994 C   0  0  0  0  0  0  0  0  0  0  0  0
  207.3260  199.9207  253.8060 C   0  0  0  0  0  0  0  0  0  0  0  0
  207.5901  198.7832  252.7993 C   0  0  0  0  0  0  0  0  0  0  0  0
  208.3710  197.6471  253.3966 C   0  0  0  0  0  0  0  0  0  0  0  0
  207.8796  196.6376  253.8766 O   0  0  0  0  0  0  0  0  0  0  0  0
  209.6894  197.9794  253.4550 O   0  0  0  0  0  0  0  0  0  0  0  0
  210.5239  197.0019  254.0918 C   0  0  0  0  0  0  0  0  0  0  0  0
  211.9387  197.5482  254.0780 C   0  0  0  0  0  0  0  0  0  0  0  0
  208.6755  200.3814  254.3882 C   0  0  0  0  0  0  0  0  0  0  0  0
  208.9775  200.3250  255.5750 O   0  0  0  0  0  0  0  0  0  0  0  0
  209.4183  201.0078  253.4297 O   0  0  0  0  0  0  0  0  0  0  0  0
  210.6721  201.5373  253.8695 C   0  0  0  0  0  0  0  0  0  0  0  0
  211.3445  202.1768  252.6676 C   0  0  0  0  0  0  0  0  0  0  0  0
  206.6159  199.3510  254.9339 O   0  0  0  0  0  0  0  0  0  0  0  0
  206.4214  200.0795  255.5571 H   0  0  0  0  0  0  0  0  0  0  0  0
  1  2  1  0  0  0  0
  2  3  1  0  0  0  0
  3  4  1  0  0  0  0
  4  5  2  0  0  0  0
  4  6  1  0  0  0  0
  6  7  1  0  0  0  0
  7  8  1  0  0  0  0
  7 14  1  0  0  0  0
  7 19  1  0  0  0  0
  8  9  1  0  0  0  0
  9 10  2  0  0  0  0
  9 11  1  0  0  0  0
 11 12  1  0  0  0  0
 12 13  1  0  0  0  0
 14 15  2  0  0  0  0
 14 16  1  0  0  0  0
 16 17  1  0  0  0  0
 17 18  1  0  0  0  0
 19 20  1  0  0  0  0
M  END
>  <CHROM.1>
-179.62462547,1.23797115,-61.27075772,-169.57994969,-179.23231874,111.69576801
-51.01732925,94.75374822,176.05459580,-179.32750509,177.20123961,179.54125724
208.23458830,200.21766532,254.31890298,2.33993191,0.41054049,0.05378928

>  <Name>


>  <RI>
0

>  <Rbt.Current_Directory>
/data/dnb03/galaxy_db/job_working_directory/014/442/14442384/working

>  <Rbt.Executable>
rbdock ($Id: //depot/dev/client3/rdock/2013.1/src/exe/rbdock.cxx#4 $)

>  <Rbt.Library>
libRbt.so (2013.1, Build901 2013/11/27)

>  <Rbt.Parameter_File>
/usr/local/tools/_conda/envs/__rdock@2013.1-0/share/rdock-2013.1-1/data/scripts/dock.prm

>  <Rbt.Receptor>
receptor.prm

>  <SCORE>
1.18309

>  <SCORE.INTER>
16.4

>  <SCORE.INTER.CONST>
1

>  <SCORE.INTER.POLAR>
0

>  <SCORE.INTER.REPUL>
0

>  <SCORE.INTER.ROT>
11

>  <SCORE.INTER.VDW>
0

>  <SCORE.INTER.norm>
0.863158

>  <SCORE.INTRA>
-15.2169

>  <SCORE.INTRA.DIHEDRAL>
-19.4798

>  <SCORE.INTRA.DIHEDRAL.0>
23.2624

>  <SCORE.INTRA.POLAR>
-0.73825

>  <SCORE.INTRA.POLAR.0>
0

>  <SCORE.INTRA.REPUL>
0

>  <SCORE.INTRA.REPUL.0>
0

>  <SCORE.INTRA.VDW>
-2.96698

>  <SCORE.INTRA.VDW.0>
1.99855

>  <SCORE.INTRA.norm>
-0.80089

>  <SCORE.RESTR>


>  <SCORE.RESTR.norm>
0

>  <SCORE.SYSTEM>
0

>  <SCORE.SYSTEM.CONST>
0

>  <SCORE.SYSTEM.DIHEDRAL>
0

>  <SCORE.SYSTEM.norm>
0

>  <SCORE.heavy>
19

>  <SCORE.norm>
0.0622678

>  <TransFSReceptor>
receptor

>  <TransFSScore>
0.142575

$$$$

 OpenBabel01192115203D
libRbt.so/2013.1/901 2013/11/27
 15 16  0  0  0  0  0  0  0  0999 V2000
  217.8612  190.6014  254.2629 C   0  0  0  0  0  0  0  0  0  0  0  0
  218.0649  189.9932  252.9693 N   0  0  0  0  0  0  0  0  0  0  0  0
  218.8334  188.7461  252.9880 C   0  0  0  0  0  0  0  0  0  0  0  0
  218.9155  187.9922  251.7526 N   0  0  0  0  0  0  0  0  0  0  0  0
  218.9247  188.7045  250.6289 C   0  0  0  0  0  0  0  0  0  0  0  0
  218.6819  190.0485  250.6560 C   0  0  0  0  0  0  0  0  0  0  0  0
  218.3902  190.8645  251.8482 C   0  0  2  0  0  0  0  0  0  0  0  0
  219.5371  191.6983  252.1324 N   0  0  0  0  0  0  0  0  0  0  0  0
  218.7916  190.4429  249.3541 N   0  0  0  0  0  0  0  0  0  0  0  0
  219.0756  189.3128  248.6244 C   0  0  0  0  0  0  0  0  0  0  0  0
  219.1658  188.2379  249.3847 N   0  0  0  0  0  0  0  0  0  0  0  0
  219.1588  187.0126  251.7705 H   0  0  0  0  0  0  0  0  0  0  0  0
  219.7177  192.2651  251.3061 H   0  0  0  0  0  0  0  0  0  0  0  0
  220.3475  191.1068  252.2644 H   0  0  0  0  0  0  0  0  0  0  0  0
  218.7027  191.3824  249.0001 H   0  0  0  0  0  0  0  0  0  0  0  0
  1  2  1  0  0  0  0
  2  7  1  0  0  0  0
  2  3  1  0  0  0  0
  3  4  1  0  0  0  0
  4  5  1  0  0  0  0
  4 12  1  0  0  0  0
  5 11  1  0  0  0  0
  5  6  2  0  0  0  0
  6  7  1  0  0  0  0
  6  9  1  0  0  0  0
  7  8  1  1  0  0  0
  8 13  1  0  0  0  0
  8 14  1  0  0  0  0
  9 10  1  0  0  0  0
  9 15  1  0  0  0  0
 10 11  2  0  0  0  0
M  END
>  <CHROM.1>
178.97691699,218.76139111,189.72357844,251.37287431,2.80860453,1.40535874
0.04026106

>  <Name>


>  <RI>
0

>  <Rbt.Current_Directory>
/data/dnb03/galaxy_db/job_working_directory/014/442/14442385/working

>  <Rbt.Executable>
rbdock ($Id: //depot/dev/client3/rdock/2013.1/src/exe/rbdock.cxx#4 $)

>  <Rbt.Library>
libRbt.so (2013.1, Build901 2013/11/27)

>  <Rbt.Parameter_File>
/usr/local/tools/_conda/envs/__rdock@2013.1-0/share/rdock-2013.1-1/data/scripts/dock.prm

>  <Rbt.Receptor>
receptor.prm

>  <SCORE>
5.90841

>  <SCORE.INTER>
6.4

>  <SCORE.INTER.CONST>
1

>  <SCORE.INTER.POLAR>
0

>  <SCORE.INTER.REPUL>
0

>  <SCORE.INTER.ROT>
1

>  <SCORE.INTER.VDW>
0

>  <SCORE.INTER.norm>
0.581818

>  <SCORE.INTRA>
-0.491594

>  <SCORE.INTRA.DIHEDRAL>
0.00197978

>  <SCORE.INTRA.DIHEDRAL.0>
0.0106726

>  <SCORE.INTRA.POLAR>
0

>  <SCORE.INTRA.POLAR.0>
0

>  <SCORE.INTRA.REPUL>
0

>  <SCORE.INTRA.REPUL.0>
0

>  <SCORE.INTRA.VDW>
-0.492584

>  <SCORE.INTRA.VDW.0>
0.111471

>  <SCORE.INTRA.norm>
-0.0446904

>  <SCORE.RESTR>


>  <SCORE.RESTR.norm>
0

>  <SCORE.SYSTEM>
0

>  <SCORE.SYSTEM.CONST>
0

>  <SCORE.SYSTEM.DIHEDRAL>
0

>  <SCORE.SYSTEM.norm>
0

>  <SCORE.heavy>
11

>  <SCORE.norm>
0.537128

>  <TransFSReceptor>
receptor

>  <TransFSScore>
0.000601

$$$$

 OpenBabel01192115203D
libRbt.so/2013.1/901 2013/11/27
 19 18  0  0  0  0  0  0  0  0999 V2000
  196.6775  202.2146  250.2458 C   0  0  0  0  0  0  0  0  0  0  0  0
  197.0893  203.1405  251.3995 C   0  0  0  0  0  0  0  0  0  0  0  0
  198.5470  203.0192  251.7595 C   0  0  0  0  0  0  0  0  0  0  0  0
  198.9772  202.6217  252.8320 O   0  0  0  0  0  0  0  0  0  0  0  0
  199.3465  203.4819  250.7911 O   0  0  0  0  0  0  0  0  0  0  0  0
  201.0210  203.5836  251.2135 P   0  0  0  0  0  0  0  0  0  0  0  0
  201.2595  202.1146  250.8719 O   0  0  0  0  0  0  0  0  0  0  0  0
  201.3476  204.4554  249.8715 O   0  0  0  0  0  0  0  0  0  0  0  0
  202.6955  203.6853  251.6360 O   0  0  0  0  0  0  0  0  0  0  0  0
  197.3431  202.4931  248.8883 C   0  0  1  0  0  0  0  0  0  0  0  0
  197.4790  204.0022  248.6395 C   0  0  0  0  0  0  0  0  0  0  0  0
  198.5474  204.5963  248.5830 O   0  0  0  0  0  0  0  0  0  0  0  0
  196.2875  204.6326  248.5153 O   0  0  0  0  0  0  0  0  0  0  0  0
  198.6776  201.8547  248.8613 N   0  0  0  0  0  0  0  0  0  0  0  0
  200.5813  204.5203  249.2755 H   0  0  0  0  0  0  0  0  0  0  0  0
  203.1286  203.2774  250.8552 H   0  0  0  0  0  0  0  0  0  0  0  0
  196.3613  205.5986  248.3626 H   0  0  0  0  0  0  0  0  0  0  0  0
  199.2828  202.3633  249.5135 H   0  0  0  0  0  0  0  0  0  0  0  0
  199.1017  202.0264  247.9473 H   0  0  0  0  0  0  0  0  0  0  0  0
  1  2  1  0  0  0  0
  2  3  1  0  0  0  0
  3  4  2  0  0  0  0
  3  5  1  0  0  0  0
  5  6  1  0  0  0  0
  6  7  2  0  0  0  0
  6  8  1  0  0  0  0
  6  9  1  0  0  0  0
  8 15  1  0  0  0  0
  9 16  1  0  0  0  0
 10  1  1  1  0  0  0
 10 11  1  0  0  0  0
 10 14  1  0  0  0  0
 11 12  2  0  0  0  0
 11 13  1  0  0  0  0
 13 17  1  0  0  0  0
 14 18  1  0  0  0  0
 14 19  1  0  0  0  0
M  END
>  <CHROM.1>
-63.87052171,-38.98344506,-116.23465457,171.82280183,84.03062343,-6.97511123
69.14438854,113.25058136,-69.34022250,179.57455400,199.19499062,203.32965652
250.35474806,2.74204250,-0.19552270,-1.09429316

>  <Name>


>  <RI>
0

>  <Rbt.Current_Directory>
/data/dnb03/galaxy_db/job_working_directory/014/442/14442386/working

>  <Rbt.Executable>
rbdock ($Id: //depot/dev/client3/rdock/2013.1/src/exe/rbdock.cxx#4 $)

>  <Rbt.Library>
libRbt.so (2013.1, Build901 2013/11/27)

>  <Rbt.Parameter_File>
/usr/local/tools/_conda/envs/__rdock@2013.1-0/share/rdock-2013.1-1/data/scripts/dock.prm

>  <Rbt.Receptor>
receptor.prm

>  <SCORE>
-4.20572

>  <SCORE.INTER>
12.4

>  <SCORE.INTER.CONST>
1

>  <SCORE.INTER.POLAR>
0

>  <SCORE.INTER.REPUL>
0

>  <SCORE.INTER.ROT>
7

>  <SCORE.INTER.VDW>
0

>  <SCORE.INTER.norm>
0.885714

>  <SCORE.INTRA>
-16.6057

>  <SCORE.INTRA.DIHEDRAL>
-20.1899

>  <SCORE.INTRA.DIHEDRAL.0>
25.589

>  <SCORE.INTRA.POLAR>
-1.93852

>  <SCORE.INTRA.POLAR.0>
0

>  <SCORE.INTRA.REPUL>
0

>  <SCORE.INTRA.REPUL.0>
0

>  <SCORE.INTRA.VDW>
0.0801853

>  <SCORE.INTRA.VDW.0>
-1.67665

>  <SCORE.INTRA.norm>
-1.18612

>  <SCORE.RESTR>


>  <SCORE.RESTR.norm>
0

>  <SCORE.SYSTEM>
0

>  <SCORE.SYSTEM.CONST>
0

>  <SCORE.SYSTEM.DIHEDRAL>
0

>  <SCORE.SYSTEM.norm>
0

>  <SCORE.heavy>
14

>  <SCORE.norm>
-0.300408

>  <TransFSReceptor>
receptor

>  <TransFSScore>
0.102971

$$$$

 OpenBabel01192115203D
libRbt.so/2013.1/901 2013/11/27
 29 31  0  0  0  0  0  0  0  0999 V2000
  197.1824  192.1272  251.4588 C   0  0  0  0  0  0  0  0  0  0  0  0
  198.4155  192.8037  251.9895 C   0  0  0  0  0  0  0  0  0  0  0  0
  199.1948  192.2114  252.7385 O   0  0  0  0  0  0  0  0  0  0  0  0
  198.7515  194.1695  251.5431 C   0  0  0  0  0  0  0  0  0  0  0  0
  199.8712  194.7648  251.9703 C   0  0  0  0  0  0  0  0  0  0  0  0
  199.9134  196.1129  251.3534 C   0  0  0  0  0  0  0  0  0  0  0  0
  200.8448  196.8956  251.4374 O   0  0  0  0  0  0  0  0  0  0  0  0
  198.6879  196.2884  250.7169 N   0  0  0  0  0  0  0  0  0  0  0  0
  197.9397  195.0441  250.6378 C   0  0  1  0  0  0  0  0  0  0  0  0
  197.8599  194.5096  249.2114 C   0  0  0  0  0  0  0  0  0  0  0  0
  199.0177  194.3375  248.4327 C   0  0  0  0  0  0  0  0  0  0  0  0
  198.9316  193.8853  247.1149 C   0  0  0  0  0  0  0  0  0  0  0  0
  197.6970  193.5608  246.5604 C   0  0  0  0  0  0  0  0  0  0  0  0
  196.5397  193.7120  247.3234 C   0  0  0  0  0  0  0  0  0  0  0  0
  196.6192  194.1895  248.6388 C   0  0  0  0  0  0  0  0  0  0  0  0
  197.7428  193.1595  245.2555 O   0  0  0  0  0  0  0  0  0  0  0  0
  196.9106  192.0573  244.9170 C   0  0  0  0  0  0  0  0  0  0  0  0
  198.3754  197.4198  249.9399 C   0  0  0  0  0  0  0  0  0  0  0  0
  199.3003  198.4589  249.8246 C   0  0  0  0  0  0  0  0  0  0  0  0
  199.0182  199.5523  248.9975 C   0  0  0  0  0  0  0  0  0  0  0  0
  197.7906  199.6381  248.3257 C   0  0  0  0  0  0  0  0  0  0  0  0
  196.8604  198.6005  248.4515 C   0  0  0  0  0  0  0  0  0  0  0  0
  197.1652  197.4874  249.2407 C   0  0  0  0  0  0  0  0  0  0  0  0
  197.5561  200.8099  247.4420 C   0  0  0  0  0  0  0  0  0  0  0  0
  198.3682  201.7109  247.3153 O   0  0  0  0  0  0  0  0  0  0  0  0
  196.3527  200.8153  246.8326 O   0  0  0  0  0  0  0  0  0  0  0  0
  200.8284  194.2780  252.8177 O   0  0  0  0  0  0  0  0  0  0  0  0
  196.1737  201.5860  246.2648 H   0  0  0  0  0  0  0  0  0  0  0  0
  200.5614  193.3676  253.0711 H   0  0  0  0  0  0  0  0  0  0  0  0
  1  2  1  0  0  0  0
  2  3  2  0  0  0  0
  2  4  1  0  0  0  0
  4  9  1  0  0  0  0
  4  5  2  0  0  0  0
  5  6  1  0  0  0  0
  5 27  1  0  0  0  0
  6  7  2  0  0  0  0
  6  8  1  0  0  0  0
  8  9  1  0  0  0  0
  8 18  1  0  0  0  0
  9 10  1  6  0  0  0
 10 15  1  0  0  0  0
 10 11  2  0  0  0  0
 11 12  1  0  0  0  0
 12 13  2  0  0  0  0
 13 14  1  0  0  0  0
 13 16  1  0  0  0  0
 14 15  2  0  0  0  0
 16 17  1  0  0  0  0
 18 23  1  0  0  0  0
 18 19  2  0  0  0  0
 19 20  1  0  0  0  0
 20 21  2  0  0  0  0
 21 22  1  0  0  0  0
 21 24  1  0  0  0  0
 22 23  2  0  0  0  0
 24 25  2  0  0  0  0
 24 26  1  0  0  0  0
 26 28  1  0  0  0  0
 27 29  1  0  0  0  0
M  END
>  <CHROM.1>
-177.59052520,0.79840215,-2.58013278,-60.80499772,138.50591435,-2.37722867
178.70084799,198.29917867,195.87100463,249.26402793,1.26502854,1.16281986
3.04373562

>  <Name>


>  <RI>
0

>  <Rbt.Current_Directory>
/data/dnb03/galaxy_db/job_working_directory/014/442/14442387/working

>  <Rbt.Executable>
rbdock ($Id: //depot/dev/client3/rdock/2013.1/src/exe/rbdock.cxx#4 $)

>  <Rbt.Library>
libRbt.so (2013.1, Build901 2013/11/27)

>  <Rbt.Parameter_File>
/usr/local/tools/_conda/envs/__rdock@2013.1-0/share/rdock-2013.1-1/data/scripts/dock.prm

>  <Rbt.Receptor>
receptor.prm

>  <SCORE>
3.93092

>  <SCORE.INTER>
10.4

>  <SCORE.INTER.CONST>
1

>  <SCORE.INTER.POLAR>
0

>  <SCORE.INTER.REPUL>
0

>  <SCORE.INTER.ROT>
5

>  <SCORE.INTER.VDW>
0

>  <SCORE.INTER.norm>
0.385185

>  <SCORE.INTRA>
-6.46908

>  <SCORE.INTRA.DIHEDRAL>
-14.8793

>  <SCORE.INTRA.DIHEDRAL.0>
18.2642

>  <SCORE.INTRA.POLAR>
-0.0663991

>  <SCORE.INTRA.POLAR.0>
0

>  <SCORE.INTRA.REPUL>
0

>  <SCORE.INTRA.REPUL.0>
0

>  <SCORE.INTRA.VDW>
1.19631

>  <SCORE.INTRA.VDW.0>
-1.06823

>  <SCORE.INTRA.norm>
-0.239596

>  <SCORE.RESTR>


>  <SCORE.RESTR.norm>
0

>  <SCORE.SYSTEM>
0

>  <SCORE.SYSTEM.CONST>
0

>  <SCORE.SYSTEM.DIHEDRAL>
0

>  <SCORE.SYSTEM.norm>
0

>  <SCORE.heavy>
27

>  <SCORE.norm>
0.145589

>  <TransFSReceptor>
receptor

>  <TransFSScore>
0.001408

$$$$

 OpenBabel01192115203D
libRbt.so/2013.1/901 2013/11/27
 25 24  0  0  0  0  0  0  0  0999 V2000
  193.3512  211.2037  252.5998 C   0  0  0  0  0  0  0  0  0  0  0  0
  194.7512  211.4690  252.0759 C   0  0  0  0  0  0  0  0  0  0  0  0
  195.2918  210.2545  251.3247 C   0  0  0  0  0  0  0  0  0  0  0  0
  196.7008  210.5124  250.8008 C   0  0  0  0  0  0  0  0  0  0  0  0
  197.2322  209.2907  250.0580 C   0  0  0  0  0  0  0  0  0  0  0  0
  198.6405  209.5463  249.5327 C   0  0  0  0  0  0  0  0  0  0  0  0
  199.1728  208.3263  248.7872 C   0  0  0  0  0  0  0  0  0  0  0  0
  200.5825  208.5904  248.2661 C   0  0  0  0  0  0  0  0  0  0  0  0
  201.1169  207.3912  247.5449 C   0  0  0  0  0  0  0  0  0  0  0  0
  202.2290  206.7398  247.9161 C   0  0  0  0  0  0  0  0  0  0  0  0
  202.7785  205.5517  247.1875 C   0  0  0  0  0  0  0  0  0  0  0  0
  204.1607  205.8278  246.6752 C   0  0  0  0  0  0  0  0  0  0  0  0
  204.4936  205.7913  245.3779 C   0  0  0  0  0  0  0  0  0  0  0  0
  205.8439  206.0246  244.9278 C   0  0  0  0  0  0  0  0  0  0  0  0
  206.2232  205.9854  243.6398 C   0  0  0  0  0  0  0  0  0  0  0  0
  207.6546  206.1155  243.1921 C   0  0  1  0  0  0  0  0  0  0  0  0
  208.1503  204.9466  242.3322 C   0  0  0  0  0  0  0  0  0  0  0  0
  208.1837  203.6151  243.0993 C   0  0  0  0  0  0  0  0  0  0  0  0
  209.2469  203.5587  244.1920 C   0  0  0  0  0  0  0  0  0  0  0  0
  208.8318  204.4141  245.3625 C   0  0  0  0  0  0  0  0  0  0  0  0
  209.3613  205.4747  245.6533 O   0  0  0  0  0  0  0  0  0  0  0  0
  207.7807  203.9093  246.0452 O   0  0  0  0  0  0  0  0  0  0  0  0
  207.8369  207.3232  242.4579 O   0  0  0  0  0  0  0  0  0  0  0  0
  207.4956  204.4624  246.7978 H   0  0  0  0  0  0  0  0  0  0  0  0
  207.6213  208.0520  243.0684 H   0  0  0  0  0  0  0  0  0  0  0  0
  1  2  1  0  0  0  0
  2  3  1  0  0  0  0
  3  4  1  0  0  0  0
  4  5  1  0  0  0  0
  5  6  1  0  0  0  0
  6  7  1  0  0  0  0
  7  8  1  0  0  0  0
  8  9  1  0  0  0  0
  9 10  2  0  0  0  0
 10 11  1  0  0  0  0
 11 12  1  0  0  0  0
 12 13  2  0  0  0  0
 13 14  1  0  0  0  0
 14 15  2  0  0  0  0
 16 15  1  6  0  0  0
 16 17  1  0  0  0  0
 16 23  1  0  0  0  0
 17 18  1  0  0  0  0
 18 19  1  0  0  0  0
 19 20  1  0  0  0  0
 20 21  2  0  0  0  0
 20 22  1  0  0  0  0
 22 24  1  0  0  0  0
 23 25  1  0  0  0  0
M  END
>  <CHROM.1>
-179.75521467,179.75329504,179.97287757,-179.89792927,-179.95371488,179.41975550
-120.13239996,119.41816765,-119.70480942,179.36221236,124.02670394,-64.61039062
61.41443730,-68.79720359,73.16673222,-108.65239371,-179.16249334,203.05287518
207.05193457,246.91848626,-2.97627810,0.60842419,-0.93217977

>  <Name>


>  <RI>
0

>  <Rbt.Current_Directory>
/data/dnb03/galaxy_db/job_working_directory/014/442/14442388/working

>  <Rbt.Executable>
rbdock ($Id: //depot/dev/client3/rdock/2013.1/src/exe/rbdock.cxx#4 $)

>  <Rbt.Library>
libRbt.so (2013.1, Build901 2013/11/27)

>  <Rbt.Parameter_File>
/usr/local/tools/_conda/envs/__rdock@2013.1-0/share/rdock-2013.1-1/data/scripts/dock.prm

>  <Rbt.Receptor>
receptor.prm

>  <SCORE>
17.3645

>  <SCORE.INTER>
20.4

>  <SCORE.INTER.CONST>
1

>  <SCORE.INTER.POLAR>
0

>  <SCORE.INTER.REPUL>
0

>  <SCORE.INTER.ROT>
15

>  <SCORE.INTER.VDW>
0

>  <SCORE.INTER.norm>
0.886957

>  <SCORE.INTRA>
-3.03553

>  <SCORE.INTRA.DIHEDRAL>
-1.05129

>  <SCORE.INTRA.DIHEDRAL.0>
3.44091

>  <SCORE.INTRA.POLAR>
0

>  <SCORE.INTRA.POLAR.0>
0

>  <SCORE.INTRA.REPUL>
0

>  <SCORE.INTRA.REPUL.0>
0

>  <SCORE.INTRA.VDW>
-2.50989

>  <SCORE.INTRA.VDW.0>
-0.777383

>  <SCORE.INTRA.norm>
-0.13198

>  <SCORE.RESTR>


>  <SCORE.RESTR.norm>
0

>  <SCORE.SYSTEM>
0

>  <SCORE.SYSTEM.CONST>
0

>  <SCORE.SYSTEM.DIHEDRAL>
0

>  <SCORE.SYSTEM.norm>
0

>  <SCORE.heavy>
23

>  <SCORE.norm>
0.754977

>  <TransFSReceptor>
receptor

>  <TransFSScore>
0.004262

$$$$

 OpenBabel01192115203D
libRbt.so/2013.1/901 2013/11/27
 28 29  0  0  0  0  0  0  0  0999 V2000
  210.8001  185.7788  251.2030 C   0  0  0  0  0  0  0  0  0  0  0  0
  211.8225  184.7080  251.5054 C   0  0  0  0  0  0  0  0  0  0  0  0
  211.6656  183.7819  252.4934 C   0  0  0  0  0  0  0  0  0  0  0  0
  212.6062  182.7366  252.6291 N   0  0  0  0  0  0  0  0  0  0  0  0
  213.7563  182.7609  251.8364 C   0  0  0  0  0  0  0  0  0  0  0  0
  214.7259  181.8993  251.9404 N   0  0  0  0  0  0  0  0  0  0  0  0
  215.8543  181.9631  251.1770 C   0  0  0  0  0  0  0  0  0  0  0  0
  216.7305  181.1057  251.2336 O   0  0  0  0  0  0  0  0  0  0  0  0
  216.0344  183.0107  250.3145 N   0  0  0  0  0  0  0  0  0  0  0  0
  215.1024  183.9505  250.0005 C   0  0  0  0  0  0  0  0  0  0  0  0
  215.2795  184.8048  249.1393 O   0  0  0  0  0  0  0  0  0  0  0  0
  213.8585  183.8771  250.8331 C   0  0  0  0  0  0  0  0  0  0  0  0
  212.9173  184.7650  250.6696 N   0  0  0  0  0  0  0  0  0  0  0  0
  212.3693  181.5198  253.4284 C   0  0  0  0  0  0  0  0  0  0  0  0
  211.5421  180.4231  252.7212 C   0  0  1  0  0  0  0  0  0  0  0  0
  212.0110  179.9530  251.3214 C   0  0  1  0  0  0  0  0  0  0  0  0
  211.8945  181.1067  250.2808 C   0  0  1  0  0  0  0  0  0  0  0  0
  212.4145  180.7325  248.8816 C   0  0  0  0  0  0  0  0  0  0  0  0
  213.8292  180.5124  248.9339 O   0  0  0  0  0  0  0  0  0  0  0  0
  210.5171  181.4982  250.1738 O   0  0  0  0  0  0  0  0  0  0  0  0
  213.3413  179.4188  251.3383 O   0  0  0  0  0  0  0  0  0  0  0  0
  211.4728  179.2787  253.5969 O   0  0  0  0  0  0  0  0  0  0  0  0
  210.5430  183.8854  253.4943 C   0  0  0  0  0  0  0  0  0  0  0  0
  216.8888  182.9974  249.7752 H   0  0  0  0  0  0  0  0  0  0  0  0
  213.9885  179.7925  249.5739 H   0  0  0  0  0  0  0  0  0  0  0  0
  210.2492  181.8630  251.0371 H   0  0  0  0  0  0  0  0  0  0  0  0
  213.9364  180.0820  251.7476 H   0  0  0  0  0  0  0  0  0  0  0  0
  212.3870  178.9585  253.7351 H   0  0  0  0  0  0  0  0  0  0  0  0
  1  2  1  0  0  0  0
  2 13  1  0  0  0  0
  2  3  2  0  0  0  0
  3  4  1  0  0  0  0
  3 23  1  0  0  0  0
  4  5  1  0  0  0  0
  4 14  1  0  0  0  0
  5 12  1  0  0  0  0
  5  6  2  0  0  0  0
  6  7  1  0  0  0  0
  7  8  2  0  0  0  0
  7  9  1  0  0  0  0
  9 10  1  0  0  0  0
  9 24  1  0  0  0  0
 10 11  2  0  0  0  0
 10 12  1  0  0  0  0
 12 13  2  0  0  0  0
 15 14  1  1  0  0  0
 15 16  1  0  0  0  0
 15 22  1  0  0  0  0
 16 17  1  0  0  0  0
 16 21  1  1  0  0  0
 17 18  1  6  0  0  0
 17 20  1  0  0  0  0
 18 19  1  0  0  0  0
 19 25  1  0  0  0  0
 20 26  1  0  0  0  0
 21 27  1  0  0  0  0
 22 28  1  0  0  0  0
M  END
>  <CHROM.1>
81.56833774,52.68019079,-65.23723447,-61.97789378,176.92745891,-53.61671277
-66.19660688,64.35182750,59.02393952,213.08776120,182.24445869,251.25004655
2.60493385,-0.45987097,3.02037171

>  <Name>


>  <RI>
0

>  <Rbt.Current_Directory>
/data/dnb03/galaxy_db/job_working_directory/014/442/14442389/working

>  <Rbt.Executable>
rbdock ($Id: //depot/dev/client3/rdock/2013.1/src/exe/rbdock.cxx#4 $)

>  <Rbt.Library>
libRbt.so (2013.1, Build901 2013/11/27)

>  <Rbt.Parameter_File>
/usr/local/tools/_conda/envs/__rdock@2013.1-0/share/rdock-2013.1-1/data/scripts/dock.prm

>  <Rbt.Receptor>
receptor.prm

>  <SCORE>
-1.84164

>  <SCORE.INTER>
10.4

>  <SCORE.INTER.CONST>
1

>  <SCORE.INTER.POLAR>
0

>  <SCORE.INTER.REPUL>
0

>  <SCORE.INTER.ROT>
5

>  <SCORE.INTER.VDW>
0

>  <SCORE.INTER.norm>
0.452174

>  <SCORE.INTRA>
-12.2416

>  <SCORE.INTRA.DIHEDRAL>
-12.1682

>  <SCORE.INTRA.DIHEDRAL.0>
16.447

>  <SCORE.INTRA.POLAR>
-0.933963

>  <SCORE.INTRA.POLAR.0>
-0.487598

>  <SCORE.INTRA.REPUL>
0

>  <SCORE.INTRA.REPUL.0>
0

>  <SCORE.INTRA.VDW>
-2.98206

>  <SCORE.INTRA.VDW.0>
-1.80842

>  <SCORE.INTRA.norm>
-0.532245

>  <SCORE.RESTR>


>  <SCORE.RESTR.norm>
0

>  <SCORE.SYSTEM>
0

>  <SCORE.SYSTEM.CONST>
0

>  <SCORE.SYSTEM.DIHEDRAL>
0

>  <SCORE.SYSTEM.norm>
0

>  <SCORE.heavy>
23

>  <SCORE.norm>
-0.0800714

>  <TransFSReceptor>
receptor

>  <TransFSScore>
0.000697

$$$$

 OpenBabel01192115203D
libRbt.so/2013.1/901 2013/11/27
 31 31  0  0  0  0  0  0  0  0999 V2000
  187.8505  217.7940  271.1288 C   0  0  0  0  0  0  0  0  0  0  0  0
  187.6790  219.0836  270.3270 C   0  0  0  0  0  0  0  0  0  0  0  0
  188.4154  220.2254  271.0450 C   0  0  0  0  0  0  0  0  0  0  0  0
  188.2034  218.9674  268.8832 C   0  0  0  0  0  0  0  0  0  0  0  0
  187.9865  220.1696  267.9311 C   0  0  1  0  0  0  0  0  0  0  0  0
  188.5990  219.9383  266.5359 C   0  0  0  0  0  0  0  0  0  0  0  0
  188.6333  221.2151  265.7117 C   0  0  0  0  0  0  0  0  0  0  0  0
  187.7253  221.5716  264.9658 O   0  0  0  0  0  0  0  0  0  0  0  0
  189.7543  221.9844  265.9150 N   0  0  0  0  0  0  0  0  0  0  0  0
  189.8065  223.2139  265.2220 O   0  0  0  0  0  0  0  0  0  0  0  0
  186.4739  220.4061  267.7774 C   0  0  0  0  0  0  0  0  0  0  0  0
  185.6347  219.5561  268.0637 O   0  0  0  0  0  0  0  0  0  0  0  0
  186.1275  221.6569  267.3392 N   0  0  0  0  0  0  0  0  0  0  0  0
  184.7437  222.0983  267.1281 C   0  0  1  0  0  0  0  0  0  0  0  0
  184.6002  223.6022  266.7910 C   0  0  0  0  0  0  0  0  0  0  0  0
  185.3384  224.0150  265.5381 C   0  0  0  0  0  0  0  0  0  0  0  0
  186.6503  224.4951  265.6141 C   0  0  0  0  0  0  0  0  0  0  0  0
  187.3979  224.6936  264.4530 C   0  0  0  0  0  0  0  0  0  0  0  0
  186.8397  224.4197  263.2059 C   0  0  0  0  0  0  0  0  0  0  0  0
  185.4998  224.0453  263.1180 C   0  0  0  0  0  0  0  0  0  0  0  0
  184.7522  223.8459  264.2788 C   0  0  0  0  0  0  0  0  0  0  0  0
  187.6690  224.5713  262.1281 O   0  0  0  0  0  0  0  0  0  0  0  0
  187.3420  225.6821  261.2954 C   0  0  0  0  0  0  0  0  0  0  0  0
  184.1467  221.1802  266.0294 C   0  0  0  0  0  0  0  0  0  0  0  0
  183.0138  220.7046  266.1291 O   0  0  0  0  0  0  0  0  0  0  0  0
  184.9459  220.9734  264.9238 N   0  0  0  0  0  0  0  0  0  0  0  0
  184.5640  220.0863  263.8499 C   0  0  0  0  0  0  0  0  0  0  0  0
  190.4211  221.8479  266.6656 H   0  0  0  0  0  0  0  0  0  0  0  0
  190.6214  223.6213  265.5904 H   0  0  0  0  0  0  0  0  0  0  0  0
  186.8448  222.3102  267.0328 H   0  0  0  0  0  0  0  0  0  0  0  0
  185.8698  221.3815  264.8898 H   0  0  0  0  0  0  0  0  0  0  0  0
  1  2  1  0  0  0  0
  2  3  1  0  0  0  0
  2  4  1  0  0  0  0
  5  4  1  1  0  0  0
  5  6  1  0  0  0  0
  5 11  1  0  0  0  0
  6  7  1  0  0  0  0
  7  8  2  0  0  0  0
  7  9  1  0  0  0  0
  9 10  1  0  0  0  0
  9 28  1  0  0  0  0
 10 29  1  0  0  0  0
 11 12  2  0  0  0  0
 11 13  1  0  0  0  0
 13 14  1  0  0  0  0
 13 30  1  0  0  0  0
 14 15  1  6  0  0  0
 14 24  1  0  0  0  0
 15 16  1  0  0  0  0
 16 21  1  0  0  0  0
 16 17  2  0  0  0  0
 17 18  1  0  0  0  0
 18 19  2  0  0  0  0
 19 20  1  0  0  0  0
 19 22  1  0  0  0  0
 20 21  2  0  0  0  0
 22 23  1  0  0  0  0
 24 25  2  0  0  0  0
 24 26  1  0  0  0  0
 26 27  1  0  0  0  0
 26 31  1  0  0  0  0
M  END
>  <CHROM.1>
175.24101441,178.11783472,-168.28874415,-18.08204923,-90.33855736,173.96829513
173.16172366,59.52365585,136.17440193,-92.30438679,-110.10869226,186.72196423
221.83100541,266.12114858,-1.45737381,-0.13229435,-0.87939720

>  <Name>


>  <RI>
0

>  <Rbt.Current_Directory>
/data/dnb03/galaxy_db/job_working_directory/014/442/14442390/working

>  <Rbt.Executable>
rbdock ($Id: //depot/dev/client3/rdock/2013.1/src/exe/rbdock.cxx#4 $)

>  <Rbt.Library>
libRbt.so (2013.1, Build901 2013/11/27)

>  <Rbt.Parameter_File>
/usr/local/tools/_conda/envs/__rdock@2013.1-0/share/rdock-2013.1-1/data/scripts/dock.prm

>  <Rbt.Receptor>
receptor.prm

>  <SCORE>
8.01303

>  <SCORE.INTER>
15.4

>  <SCORE.INTER.CONST>
1

>  <SCORE.INTER.POLAR>
0

>  <SCORE.INTER.REPUL>
0

>  <SCORE.INTER.ROT>
10

>  <SCORE.INTER.VDW>
0

>  <SCORE.INTER.norm>
0.57037

>  <SCORE.INTRA>
-7.38697

>  <SCORE.INTRA.DIHEDRAL>
4.05068

>  <SCORE.INTRA.DIHEDRAL.0>
6.92872

>  <SCORE.INTRA.POLAR>
-1

>  <SCORE.INTRA.POLAR.0>
0

>  <SCORE.INTRA.REPUL>
0

>  <SCORE.INTRA.REPUL.0>
0

>  <SCORE.INTRA.VDW>
-6.01231

>  <SCORE.INTRA.VDW.0>
-0.457464

>  <SCORE.INTRA.norm>
-0.273592

>  <SCORE.RESTR>


>  <SCORE.RESTR.norm>
0

>  <SCORE.SYSTEM>
0

>  <SCORE.SYSTEM.CONST>
0

>  <SCORE.SYSTEM.DIHEDRAL>
0

>  <SCORE.SYSTEM.norm>
0

>  <SCORE.heavy>
27

>  <SCORE.norm>
0.296779

>  <TransFSReceptor>
receptor

>  <TransFSScore>
0.016574

$$$$

 OpenBabel01192115203D
libRbt.so/2013.1/901 2013/11/27
 37 41  0  0  0  0  0  0  0  0999 V2000
  219.2924  183.6505  243.5576 C   0  0  0  0  0  0  0  0  0  0  0  0
  220.2387  182.5586  244.0148 C   0  0  0  0  0  0  0  0  0  0  0  0
  221.5792  182.9382  243.7794 C   0  0  0  0  0  0  0  0  0  0  0  0
  222.6212  182.0961  244.1372 C   0  0  0  0  0  0  0  0  0  0  0  0
  222.3152  180.8615  244.7269 C   0  0  0  0  0  0  0  0  0  0  0  0
  220.9727  180.4872  244.9373 C   0  0  0  0  0  0  0  0  0  0  0  0
  219.9186  181.3427  244.5959 C   0  0  0  0  0  0  0  0  0  0  0  0
  220.5971  178.9409  245.7454 S   0  0  0  0  0  0  0  0  0  0  0  0
  221.8058  178.1517  245.7797 O   0  0  0  0  0  0  0  0  0  0  0  0
  219.8584  179.2663  246.9465 O   0  0  0  0  0  0  0  0  0  0  0  0
  219.4980  178.2298  244.6655 N   0  0  0  0  0  0  0  0  0  0  0  0
  220.1176  177.6108  243.4796 C   0  0  0  0  0  0  0  0  0  0  0  0
  220.8362  178.5874  242.5743 C   0  0  0  0  0  0  0  0  0  0  0  0
  222.2293  178.6011  242.4318 C   0  0  0  0  0  0  0  0  0  0  0  0
  222.8551  179.5773  241.6503 C   0  0  0  0  0  0  0  0  0  0  0  0
  222.0947  180.5593  241.0147 C   0  0  0  0  0  0  0  0  0  0  0  0
  220.7127  180.5666  241.1583 C   0  0  0  0  0  0  0  0  0  0  0  0
  220.0861  179.5918  241.9359 C   0  0  0  0  0  0  0  0  0  0  0  0
  221.5868  184.2479  243.1593 C   0  0  0  0  0  0  0  0  0  0  0  0
  220.2523  184.6867  243.0063 C   0  0  0  0  0  0  0  0  0  0  0  0
  219.9487  185.9154  242.4379 C   0  0  0  0  0  0  0  0  0  0  0  0
  221.0130  186.7088  241.9941 C   0  0  0  0  0  0  0  0  0  0  0  0
  222.3470  186.2835  242.1536 C   0  0  0  0  0  0  0  0  0  0  0  0
  222.6386  185.0474  242.7438 C   0  0  0  0  0  0  0  0  0  0  0  0
  220.7036  188.3197  241.2861 S   0  0  0  0  0  0  0  0  0  0  0  0
  219.2787  188.4231  241.0660 O   0  0  0  0  0  0  0  0  0  0  0  0
  221.4293  189.2802  242.0883 O   0  0  0  0  0  0  0  0  0  0  0  0
  221.4932  188.2623  239.7904 N   0  0  0  0  0  0  0  0  0  0  0  0
  220.7766  187.5407  238.7300 C   0  0  0  0  0  0  0  0  0  0  0  0
  220.5507  186.0859  239.0577 C   0  0  0  0  0  0  0  0  0  0  0  0
  219.2563  185.5941  239.2787 C   0  0  0  0  0  0  0  0  0  0  0  0
  219.0630  184.2665  239.6673 C   0  0  0  0  0  0  0  0  0  0  0  0
  220.1579  183.4194  239.8314 C   0  0  0  0  0  0  0  0  0  0  0  0
  221.4468  183.8945  239.5990 C   0  0  0  0  0  0  0  0  0  0  0  0
  221.6426  185.2206  239.2141 C   0  0  0  0  0  0  0  0  0  0  0  0
  218.7506  178.8758  244.4134 H   0  0  0  0  0  0  0  0  0  0  0  0
  222.4738  187.9986  239.8757 H   0  0  0  0  0  0  0  0  0  0  0  0
  1 20  1  0  0  0  0
  1  2  1  0  0  0  0
  2  7  1  0  0  0  0
  2  3  2  0  0  0  0
  3  4  1  0  0  0  0
  3 19  1  0  0  0  0
  4  5  2  0  0  0  0
  5  6  1  0  0  0  0
  6  7  2  0  0  0  0
  6  8  1  0  0  0  0
  8  9  2  0  0  0  0
  8 10  2  0  0  0  0
  8 11  1  0  0  0  0
 11 12  1  0  0  0  0
 11 36  1  0  0  0  0
 12 13  1  0  0  0  0
 13 18  1  0  0  0  0
 13 14  2  0  0  0  0
 14 15  1  0  0  0  0
 15 16  2  0  0  0  0
 16 17  1  0  0  0  0
 17 18  2  0  0  0  0
 19 24  1  0  0  0  0
 19 20  2  0  0  0  0
 20 21  1  0  0  0  0
 21 22  2  0  0  0  0
 22 23  1  0  0  0  0
 22 25  1  0  0  0  0
 23 24  2  0  0  0  0
 25 26  2  0  0  0  0
 25 27  2  0  0  0  0
 25 28  1  0  0  0  0
 28 29  1  0  0  0  0
 28 37  1  0  0  0  0
 29 30  1  0  0  0  0
 30 35  1  0  0  0  0
 30 31  2  0  0  0  0
 31 32  1  0  0  0  0
 32 33  2  0  0  0  0
 33 34  1  0  0  0  0
 34 35  2  0  0  0  0
M  END
>  <CHROM.1>
-13.50402942,78.53708000,-63.69723550,110.95831508,-10.78483372,78.54885743
-61.62654726,113.01950059,220.85912537,183.11054402,242.46458471,1.99770666
1.54009769,-0.86438837

>  <Name>


>  <RI>
0

>  <Rbt.Current_Directory>
/data/dnb03/galaxy_db/job_working_directory/014/442/14442391/working

>  <Rbt.Executable>
rbdock ($Id: //depot/dev/client3/rdock/2013.1/src/exe/rbdock.cxx#4 $)

>  <Rbt.Library>
libRbt.so (2013.1, Build901 2013/11/27)

>  <Rbt.Parameter_File>
/usr/local/tools/_conda/envs/__rdock@2013.1-0/share/rdock-2013.1-1/data/scripts/dock.prm

>  <Rbt.Receptor>
receptor.prm

>  <SCORE>
3.59752

>  <SCORE.INTER>
13.4

>  <SCORE.INTER.CONST>
1

>  <SCORE.INTER.POLAR>
0

>  <SCORE.INTER.REPUL>
0

>  <SCORE.INTER.ROT>
8

>  <SCORE.INTER.VDW>
0

>  <SCORE.INTER.norm>
0.382857

>  <SCORE.INTRA>
-9.80248

>  <SCORE.INTRA.DIHEDRAL>
-1.7733

>  <SCORE.INTRA.DIHEDRAL.0>
6.39493

>  <SCORE.INTRA.POLAR>
0

>  <SCORE.INTRA.POLAR.0>
0

>  <SCORE.INTRA.REPUL>
0

>  <SCORE.INTRA.REPUL.0>
0

>  <SCORE.INTRA.VDW>
-8.91583

>  <SCORE.INTRA.VDW.0>
-2.45826

>  <SCORE.INTRA.norm>
-0.280071

>  <SCORE.RESTR>


>  <SCORE.RESTR.norm>
0

>  <SCORE.SYSTEM>
0

>  <SCORE.SYSTEM.CONST>
0

>  <SCORE.SYSTEM.DIHEDRAL>
0

>  <SCORE.SYSTEM.norm>
0

>  <SCORE.heavy>
35

>  <SCORE.norm>
0.102786

>  <TransFSReceptor>
receptor

>  <TransFSScore>
0.004756

$$$$

 OpenBabel01192115203D
libRbt.so/2013.1/901 2013/11/27
 54 56  0  0  0  0  0  0  0  0999 V2000
  210.1332  193.9201  232.9768 C   0  0  0  0  0  0  0  0  0  0  0  0
  209.8654  192.4101  233.1646 C   0  0  0  0  0  0  0  0  0  0  0  0
  208.3640  192.2552  233.5018 C   0  0  0  0  0  0  0  0  0  0  0  0
  210.1209  191.7119  231.8176 C   0  0  0  0  0  0  0  0  0  0  0  0
  210.1467  190.2799  231.9298 O   0  0  0  0  0  0  0  0  0  0  0  0
  210.2274  189.4215  230.4299 P   0  0  1  0  0  0  0  0  0  0  0  0
  211.6091  189.9792  230.0724 O   0  0  0  0  0  0  0  0  0  0  0  0
  210.5139  188.1054  231.3652 O   0  0  0  0  0  0  0  0  0  0  0  0
  210.3080  188.5631  228.9301 O   0  0  0  0  0  0  0  0  0  0  0  0
  209.7823  189.5958  227.6455 P   0  0  1  0  0  0  0  0  0  0  0  0
  210.2237  188.5426  226.6140 O   0  0  0  0  0  0  0  0  0  0  0  0
  208.2524  189.1868  228.0710 O   0  0  0  0  0  0  0  0  0  0  0  0
  209.2566  190.6285  226.3609 O   0  0  0  0  0  0  0  0  0  0  0  0
  209.2847  192.0364  226.5911 C   0  0  0  0  0  0  0  0  0  0  0  0
  208.4935  192.4193  227.8330 C   0  0  1  0  0  0  0  0  0  0  0  0
  208.3387  193.9171  228.1101 C   0  0  2  0  0  0  0  0  0  0  0  0
  207.1794  193.9011  229.0953 C   0  0  1  0  0  0  0  0  0  0  0  0
  206.2905  192.8057  228.4623 C   0  0  1  0  0  0  0  0  0  0  0  0
  207.1552  191.8910  227.7535 O   0  0  0  0  0  0  0  0  0  0  0  0
  205.4542  192.0506  229.3624 N   0  0  0  0  0  0  0  0  0  0  0  0
  204.0995  192.1885  229.4991 C   0  0  0  0  0  0  0  0  0  0  0  0
  203.6167  191.4130  230.4504 N   0  0  0  0  0  0  0  0  0  0  0  0
  204.7163  190.7289  230.9378 C   0  0  0  0  0  0  0  0  0  0  0  0
  204.8750  189.7965  231.9737 C   0  0  0  0  0  0  0  0  0  0  0  0
  206.1018  189.2625  232.1870 N   0  0  0  0  0  0  0  0  0  0  0  0
  207.1268  189.6963  231.4212 C   0  0  0  0  0  0  0  0  0  0  0  0
  207.1085  190.6180  230.4376 N   0  0  0  0  0  0  0  0  0  0  0  0
  205.8592  191.0804  230.2413 C   0  0  0  0  0  0  0  0  0  0  0  0
  203.8412  189.3900  232.7994 N   0  0  0  0  0  0  0  0  0  0  0  0
  207.7003  193.6304  230.4012 O   0  0  0  0  0  0  0  0  0  0  0  0
  207.9637  194.6866  226.9677 O   0  0  0  0  0  0  0  0  0  0  0  0
  210.7774  191.8314  234.2875 C   0  0  1  0  0  0  0  0  0  0  0  0
  210.3644  190.4102  234.7554 C   0  0  0  0  0  0  0  0  0  0  0  0
  209.4884  190.1897  235.5794 O   0  0  0  0  0  0  0  0  0  0  0  0
  211.0875  189.3799  234.1846 N   0  0  0  0  0  0  0  0  0  0  0  0
  212.2367  188.7880  234.8441 C   0  0  0  0  0  0  0  0  0  0  0  0
  212.9499  187.7245  234.0006 C   0  0  0  0  0  0  0  0  0  0  0  0
  213.6054  188.3567  232.8184 C   0  0  0  0  0  0  0  0  0  0  0  0
  213.1553  188.2437  231.6817 O   0  0  0  0  0  0  0  0  0  0  0  0
  214.7430  189.0900  233.0967 N   0  0  0  0  0  0  0  0  0  0  0  0
  214.6613  190.5383  233.1690 C   0  0  0  0  0  0  0  0  0  0  0  0
  214.3604  191.1046  231.8047 C   0  0  0  0  0  0  0  0  0  0  0  0
  215.6039  190.6912  230.5214 S   0  0  0  0  0  0  0  0  0  0  0  0
  212.1587  191.8385  233.9095 O   0  0  0  0  0  0  0  0  0  0  0  0
  211.4655  187.8579  231.2785 H   0  0  0  0  0  0  0  0  0  0  0  0
  207.7497  189.9317  228.4428 H   0  0  0  0  0  0  0  0  0  0  0  0
  204.1548  188.8953  233.6333 H   0  0  0  0  0  0  0  0  0  0  0  0
  203.1295  190.0985  232.9095 H   0  0  0  0  0  0  0  0  0  0  0  0
  207.8837  192.6729  230.4896 H   0  0  0  0  0  0  0  0  0  0  0  0
  207.9220  195.6288  227.2292 H   0  0  0  0  0  0  0  0  0  0  0  0
  211.0056  189.2965  233.1600 H   0  0  0  0  0  0  0  0  0  0  0  0
  215.6463  188.6649  232.8982 H   0  0  0  0  0  0  0  0  0  0  0  0
  216.6504  191.2749  231.1379 H   0  0  0  0  0  0  0  0  0  0  0  0
  212.4226  192.7731  233.8022 H   0  0  0  0  0  0  0  0  0  0  0  0
  1  2  1  0  0  0  0
  2  3  1  0  0  0  0
  2  4  1  0  0  0  0
  2 32  1  0  0  0  0
  4  5  1  0  0  0  0
  5  6  1  0  0  0  0
  6  7  2  6  0  0  0
  6  8  1  0  0  0  0
  6  9  1  0  0  0  0
  8 45  1  0  0  0  0
  9 10  1  0  0  0  0
 10 11  2  6  0  0  0
 10 12  1  0  0  0  0
 10 13  1  0  0  0  0
 12 46  1  0  0  0  0
 13 14  1  0  0  0  0
 15 14  1  6  0  0  0
 15 19  1  0  0  0  0
 15 16  1  0  0  0  0
 16 17  1  0  0  0  0
 16 31  1  6  0  0  0
 17 18  1  0  0  0  0
 17 30  1  1  0  0  0
 18 19  1  0  0  0  0
 18 20  1  1  0  0  0
 20 28  1  0  0  0  0
 20 21  1  0  0  0  0
 21 22  2  0  0  0  0
 22 23  1  0  0  0  0
 23 28  1  0  0  0  0
 23 24  2  0  0  0  0
 24 25  1  0  0  0  0
 24 29  1  0  0  0  0
 25 26  2  0  0  0  0
 26 27  1  0  0  0  0
 27 28  2  0  0  0  0
 29 47  1  0  0  0  0
 29 48  1  0  0  0  0
 30 49  1  0  0  0  0
 31 50  1  0  0  0  0
 32 33  1  6  0  0  0
 32 44  1  0  0  0  0
 33 34  2  0  0  0  0
 33 35  1  0  0  0  0
 35 36  1  0  0  0  0
 35 51  1  0  0  0  0
 36 37  1  0  0  0  0
 37 38  1  0  0  0  0
 38 39  2  0  0  0  0
 38 40  1  0  0  0  0
 40 41  1  0  0  0  0
 40 52  1  0  0  0  0
 41 42  1  0  0  0  0
 42 43  1  0  0  0  0
 43 53  1  0  0  0  0
 44 54  1  0  0  0  0
M  END
>  <CHROM.1>
169.06931557,167.36212603,172.53368003,64.24423372,-106.85876099,178.64893836
171.92004229,112.58967069,149.31762370,-55.27691315,-174.38262307,-177.87897225
-78.39897425,105.57035472,-165.74878350,-83.10907493,64.21014531,95.77250689
-176.19024075,67.85665176,-105.93627720,-100.82983837,-67.33571729,-59.18391336
-60.09951689,209.56574335,190.69687330,230.81544663,0.47894544,-0.19021314
1.72520936

>  <Name>


>  <RI>
0

>  <Rbt.Current_Directory>
/data/dnb03/galaxy_db/job_working_directory/014/442/14442393/working

>  <Rbt.Executable>
rbdock ($Id: //depot/dev/client3/rdock/2013.1/src/exe/rbdock.cxx#4 $)

>  <Rbt.Library>
libRbt.so (2013.1, Build901 2013/11/27)

>  <Rbt.Parameter_File>
/usr/local/tools/_conda/envs/__rdock@2013.1-0/share/rdock-2013.1-1/data/scripts/dock.prm

>  <Rbt.Receptor>
receptor.prm

>  <SCORE>
-4.50356

>  <SCORE.INTER>
25.4

>  <SCORE.INTER.CONST>
1

>  <SCORE.INTER.POLAR>
0

>  <SCORE.INTER.REPUL>
0

>  <SCORE.INTER.ROT>
20

>  <SCORE.INTER.VDW>
0

>  <SCORE.INTER.norm>
0.577273

>  <SCORE.INTRA>
-29.9036

>  <SCORE.INTRA.DIHEDRAL>
-11.5223

>  <SCORE.INTRA.DIHEDRAL.0>
29.7015

>  <SCORE.INTRA.POLAR>
-1.44419

>  <SCORE.INTRA.POLAR.0>
-2.81932

>  <SCORE.INTRA.REPUL>
0

>  <SCORE.INTRA.REPUL.0>
0

>  <SCORE.INTRA.VDW>
-19.2322

>  <SCORE.INTRA.VDW.0>
5.45127

>  <SCORE.INTRA.norm>
-0.679626

>  <SCORE.RESTR>


>  <SCORE.RESTR.norm>
0

>  <SCORE.SYSTEM>
0

>  <SCORE.SYSTEM.CONST>
0

>  <SCORE.SYSTEM.DIHEDRAL>
0

>  <SCORE.SYSTEM.norm>
0

>  <SCORE.heavy>
44

>  <SCORE.norm>
-0.102354

>  <TransFSReceptor>
receptor

>  <TransFSScore>
0.015957

$$$$

 OpenBabel01192115203D
libRbt.so/2013.1/901 2013/11/27
 19 20  0  0  0  0  0  0  0  0999 V2000
  208.9807  205.3423  251.0125 C   0  0  0  0  0  0  0  0  0  0  0  0
  208.4788  204.8571  252.3702 C   0  0  0  0  0  0  0  0  0  0  0  0
  208.5122  203.3305  252.4826 C   0  0  0  0  0  0  0  0  0  0  0  0
  207.7583  202.6641  251.3228 C   0  0  0  0  0  0  0  0  0  0  0  0
  208.2984  203.1517  249.9744 C   0  0  0  0  0  0  0  0  0  0  0  0
  208.2285  204.6724  249.8675 C   0  0  0  0  0  0  0  0  0  0  0  0
  207.8109  201.2129  251.3965 N   0  0  0  0  0  0  0  0  0  0  0  0
  206.7939  200.4786  251.9789 C   0  0  0  0  0  0  0  0  0  0  0  0
  205.7727  200.9902  252.4490 O   0  0  0  0  0  0  0  0  0  0  0  0
  207.0134  198.9641  251.9759 C   0  0  0  0  0  0  0  0  0  0  0  0
  208.3536  198.6468  251.4620 N   0  0  0  0  0  0  0  0  0  0  0  0
  208.3253  198.4669  250.0005 C   0  0  0  0  0  0  0  0  0  0  0  0
  209.6872  198.7865  249.3601 C   0  0  2  0  0  0  0  0  0  0  0  0
  210.7756  197.8391  249.8401 C   0  0  0  0  0  0  0  0  0  0  0  0
  212.0273  198.6528  249.6347 C   0  0  0  0  0  0  0  0  0  0  0  0
  211.5607  200.0687  249.9070 C   0  0  0  0  0  0  0  0  0  0  0  0
  210.1377  200.1043  249.7290 O   0  0  0  0  0  0  0  0  0  0  0  0
  208.6760  200.7318  251.1738 H   0  0  0  0  0  0  0  0  0  0  0  0
  208.6710  197.7632  251.8768 H   0  0  0  0  0  0  0  0  0  0  0  0
  1  6  1  0  0  0  0
  1  2  1  0  0  0  0
  2  3  1  0  0  0  0
  3  4  1  0  0  0  0
  4  5  1  0  0  0  0
  4  7  1  0  0  0  0
  5  6  1  0  0  0  0
  7  8  1  0  0  0  0
  7 18  1  0  0  0  0
  8  9  2  0  0  0  0
  8 10  1  0  0  0  0
 10 11  1  0  0  0  0
 11 12  1  0  0  0  0
 11 19  1  0  0  0  0
 13 12  1  1  0  0  0
 13 17  1  0  0  0  0
 13 14  1  0  0  0  0
 14 15  1  0  0  0  0
 15 16  1  0  0  0  0
 16 17  1  0  0  0  0
M  END
>  <CHROM.1>
95.50106289,5.86765304,-89.82370496,153.36065514,63.16757340,208.73936472
201.05644367,250.87260351,-1.97492861,-0.51143894,-3.09840936

>  <Name>


>  <RI>
0

>  <Rbt.Current_Directory>
/data/dnb03/galaxy_db/job_working_directory/014/442/14442410/working

>  <Rbt.Executable>
rbdock ($Id: //depot/dev/client3/rdock/2013.1/src/exe/rbdock.cxx#4 $)

>  <Rbt.Library>
libRbt.so (2013.1, Build901 2013/11/27)

>  <Rbt.Parameter_File>
/usr/local/tools/_conda/envs/__rdock@2013.1-0/share/rdock-2013.1-1/data/scripts/dock.prm

>  <Rbt.Receptor>
receptor.prm

>  <SCORE>
6.74999

>  <SCORE.INTER>
10.4

>  <SCORE.INTER.CONST>
1

>  <SCORE.INTER.POLAR>
0

>  <SCORE.INTER.REPUL>
0

>  <SCORE.INTER.ROT>
5

>  <SCORE.INTER.VDW>
0

>  <SCORE.INTER.norm>
0.611765

>  <SCORE.INTRA>
-3.65001

>  <SCORE.INTRA.DIHEDRAL>
2.19247

>  <SCORE.INTRA.DIHEDRAL.0>
2.24835

>  <SCORE.INTRA.POLAR>
-1.15576

>  <SCORE.INTRA.POLAR.0>
0

>  <SCORE.INTRA.REPUL>
0

>  <SCORE.INTRA.REPUL.0>
0

>  <SCORE.INTRA.VDW>
-0.816676

>  <SCORE.INTRA.VDW.0>
-1.60716

>  <SCORE.INTRA.norm>
-0.214707

>  <SCORE.RESTR>


>  <SCORE.RESTR.norm>
0

>  <SCORE.SYSTEM>
0

>  <SCORE.SYSTEM.CONST>
0

>  <SCORE.SYSTEM.DIHEDRAL>
0

>  <SCORE.SYSTEM.norm>
0

>  <SCORE.heavy>
17

>  <SCORE.norm>
0.397058

>  <TransFSReceptor>
receptor

>  <TransFSScore>
0.008115

$$$$

 OpenBabel01192115203D
libRbt.so/2013.1/901 2013/11/27
 39 41  0  0  0  0  0  0  0  0999 V2000
  199.9197  207.4807  244.4513 C   0  0  0  0  0  0  0  0  0  0  0  0
  199.6681  206.8637  245.8182 C   0  0  0  0  0  0  0  0  0  0  0  0
  198.6574  205.7405  245.7592 C   0  0  0  0  0  0  0  0  0  0  0  0
  197.4959  205.8280  246.1320 O   0  0  0  0  0  0  0  0  0  0  0  0
  199.2198  204.6477  245.1630 O   0  0  0  0  0  0  0  0  0  0  0  0
  198.3166  203.5483  244.9286 C   0  0  1  0  0  0  0  0  0  0  0  0
  197.2958  203.9260  243.8248 C   0  0  0  0  0  0  0  0  0  0  0  0
  197.9349  204.1901  242.4622 C   0  0  0  0  0  0  0  0  0  0  0  0
  196.1679  202.9046  243.7105 C   0  0  0  0  0  0  0  0  0  0  0  0
  199.0856  202.3540  244.6197 O   0  0  0  0  0  0  0  0  0  0  0  0
  200.1188  201.9989  245.9611 P   0  0  1  0  0  0  0  0  0  0  0  0
  199.0715  201.0259  246.5238 O   0  0  0  0  0  0  0  0  0  0  0  0
  201.2648  201.0049  244.7952 C   0  0  0  0  0  0  0  0  0  0  0  0
  202.2520  201.7901  243.9233 C   0  0  0  0  0  0  0  0  0  0  0  0
  201.6332  202.7501  242.9045 C   0  0  0  0  0  0  0  0  0  0  0  0
  202.6849  203.5941  242.1873 C   0  0  0  0  0  0  0  0  0  0  0  0
  203.3993  204.5642  243.0900 C   0  0  0  0  0  0  0  0  0  0  0  0
  204.7814  204.4676  243.2822 C   0  0  0  0  0  0  0  0  0  0  0  0
  205.4305  205.3308  244.1633 C   0  0  0  0  0  0  0  0  0  0  0  0
  204.7054  206.2951  244.8605 C   0  0  0  0  0  0  0  0  0  0  0  0
  203.3272  206.4023  244.6735 C   0  0  0  0  0  0  0  0  0  0  0  0
  202.6770  205.5398  243.7921 C   0  0  0  0  0  0  0  0  0  0  0  0
  201.2117  201.6234  247.3800 C   0  0  0  0  0  0  0  0  0  0  0  0
  200.8842  202.4671  248.5829 C   0  0  0  0  0  0  0  0  0  0  0  0
  200.1145  202.0649  249.4561 O   0  0  0  0  0  0  0  0  0  0  0  0
  201.4291  203.7340  248.5820 N   0  0  0  0  0  0  0  0  0  0  0  0
  201.4983  204.5968  249.7459 C   0  0  0  0  0  0  0  0  0  0  0  0
  201.4492  206.0026  249.1435 C   0  0  2  0  0  0  0  0  0  0  0  0
  202.1934  205.8489  247.8018 C   0  0  0  0  0  0  0  0  0  0  0  0
  202.1250  204.3640  247.4439 C   0  0  1  0  0  0  0  0  0  0  0  0
  203.5880  203.9088  247.1568 C   0  0  0  0  0  0  0  0  0  0  0  0
  204.4105  204.0341  248.1063 O   0  0  0  0  0  0  0  0  0  0  0  0
  203.7672  203.4707  245.9818 O   0  5  0  0  0  0  0  0  0  0  0  0
  202.0320  207.1422  250.0101 C   0  0  0  0  0  0  0  0  0  0  0  0
  201.8640  208.4978  249.2893 C   0  0  0  0  0  0  0  0  0  0  0  0
  202.3515  209.6757  250.1241 C   0  0  0  0  0  0  0  0  0  0  0  0
  201.6733  209.7061  251.4854 C   0  0  0  0  0  0  0  0  0  0  0  0
  201.8770  208.3890  252.2256 C   0  0  0  0  0  0  0  0  0  0  0  0
  201.3867  207.1936  251.4059 C   0  0  0  0  0  0  0  0  0  0  0  0
  1  2  1  0  0  0  0
  2  3  1  0  0  0  0
  3  4  2  0  0  0  0
  3  5  1  0  0  0  0
  6  5  1  6  0  0  0
  6  7  1  0  0  0  0
  6 10  1  0  0  0  0
  7  8  1  0  0  0  0
  7  9  1  0  0  0  0
 10 11  1  0  0  0  0
 11 12  2  1  0  0  0
 11 13  1  0  0  0  0
 11 23  1  0  0  0  0
 13 14  1  0  0  0  0
 14 15  1  0  0  0  0
 15 16  1  0  0  0  0
 16 17  1  0  0  0  0
 17 22  1  0  0  0  0
 17 18  2  0  0  0  0
 18 19  1  0  0  0  0
 19 20  2  0  0  0  0
 20 21  1  0  0  0  0
 21 22  2  0  0  0  0
 23 24  1  0  0  0  0
 24 25  2  0  0  0  0
 24 26  1  0  0  0  0
 26 30  1  0  0  0  0
 26 27  1  0  0  0  0
 27 28  1  0  0  0  0
 28 29  1  0  0  0  0
 28 34  1  1  0  0  0
 29 30  1  0  0  0  0
 30 31  1  1  0  0  0
 31 32  2  0  0  0  0
 31 33  1  0  0  0  0
 34 39  1  0  0  0  0
 34 35  1  0  0  0  0
 35 36  1  0  0  0  0
 36 37  1  0  0  0  0
 37 38  1  0  0  0  0
 38 39  1  0  0  0  0
M  CHG  1  33  -1
M  END
>  <CHROM.1>
-104.24796870,-174.25490701,69.36292572,63.32166974,59.87203800,94.82776366
79.73330684,69.39499835,-62.48439760,173.92379176,-66.35526316,118.30033467
93.53984389,-177.99583047,-56.87978437,201.16147826,204.62468562,246.42682282
1.84580623,-0.30492574,-2.13132105

>  <Name>


>  <RI>
0

>  <Rbt.Current_Directory>
/data/dnb03/galaxy_db/job_working_directory/014/442/14442411/working

>  <Rbt.Executable>
rbdock ($Id: //depot/dev/client3/rdock/2013.1/src/exe/rbdock.cxx#4 $)

>  <Rbt.Library>
libRbt.so (2013.1, Build901 2013/11/27)

>  <Rbt.Parameter_File>
/usr/local/tools/_conda/envs/__rdock@2013.1-0/share/rdock-2013.1-1/data/scripts/dock.prm

>  <Rbt.Receptor>
receptor.prm

>  <SCORE>
13.0179

>  <SCORE.INTER>
20.4

>  <SCORE.INTER.CONST>
1

>  <SCORE.INTER.POLAR>
0

>  <SCORE.INTER.REPUL>
0

>  <SCORE.INTER.ROT>
15

>  <SCORE.INTER.VDW>
0

>  <SCORE.INTER.norm>
0.523077

>  <SCORE.INTRA>
-7.38211

>  <SCORE.INTRA.DIHEDRAL>
-1.92471

>  <SCORE.INTRA.DIHEDRAL.0>
12.0041

>  <SCORE.INTRA.POLAR>
0

>  <SCORE.INTRA.POLAR.0>
0

>  <SCORE.INTRA.REPUL>
0

>  <SCORE.INTRA.REPUL.0>
0

>  <SCORE.INTRA.VDW>
-6.41975

>  <SCORE.INTRA.VDW.0>
-2.97684

>  <SCORE.INTRA.norm>
-0.189285

>  <SCORE.RESTR>


>  <SCORE.RESTR.norm>
0

>  <SCORE.SYSTEM>
0

>  <SCORE.SYSTEM.CONST>
0

>  <SCORE.SYSTEM.DIHEDRAL>
0

>  <SCORE.SYSTEM.norm>
0

>  <SCORE.heavy>
39

>  <SCORE.norm>
0.333792

>  <TransFSReceptor>
receptor

>  <TransFSScore>
0.020757

$$$$

 OpenBabel01192115203D
libRbt.so/2013.1/901 2013/11/27
 17 18  0  0  0  0  0  0  0  0999 V2000
  200.5768  219.8896  249.0703 C   0  0  0  0  0  0  0  0  0  0  0  0
  199.1166  220.0394  248.6782 C   0  0  0  0  0  0  0  0  0  0  0  0
  198.8844  219.6119  247.2308 C   0  0  0  0  0  0  0  0  0  0  0  0
  197.5026  219.7519  246.8384 N   0  0  0  0  0  0  0  0  0  0  0  0
  196.5903  218.6382  246.8188 C   0  0  0  0  0  0  0  0  0  0  0  0
  195.3800  219.2837  246.2446 C   0  0  0  0  0  0  0  0  0  0  0  0
  195.5761  220.5563  245.9051 C   0  0  0  0  0  0  0  0  0  0  0  0
  196.9630  220.8869  246.2598 C   0  0  0  0  0  0  0  0  0  0  0  0
  197.5026  221.9597  246.0594 O   0  0  0  0  0  0  0  0  0  0  0  0
  194.6013  221.4607  245.2816 C   0  0  0  0  0  0  0  0  0  0  0  0
  193.2026  220.8445  245.1007 C   0  0  0  0  0  0  0  0  0  0  0  0
  193.0110  219.2967  245.2286 C   0  0  2  0  0  0  0  0  0  0  0  0
  194.1110  218.5542  246.0414 C   0  0  0  0  0  0  0  0  0  0  0  0
  192.6216  218.5754  243.8766 C   0  0  0  0  0  0  0  0  0  0  0  0
  193.7585  218.6720  242.8468 C   0  0  0  0  0  0  0  0  0  0  0  0
  192.2806  217.0814  244.1094 C   0  0  0  0  0  0  0  0  0  0  0  0
  191.3421  219.2054  243.2738 C   0  0  0  0  0  0  0  0  0  0  0  0
  1  2  1  0  0  0  0
  2  3  1  0  0  0  0
  3  4  1  0  0  0  0
  4  8  1  0  0  0  0
  4  5  1  0  0  0  0
  5  6  1  0  0  0  0
  6 13  1  0  0  0  0
  6  7  2  0  0  0  0
  7  8  1  0  0  0  0
  7 10  1  0  0  0  0
  8  9  2  0  0  0  0
 10 11  1  0  0  0  0
 11 12  1  0  0  0  0
 12 13  1  0  0  0  0
 12 14  1  6  0  0  0
 14 15  1  0  0  0  0
 14 16  1  0  0  0  0
 14 17  1  0  0  0  0
M  END
>  <CHROM.1>
-179.79221995,-99.15074574,65.19051727,195.49392173,219.66413711,245.81140822
-0.08760544,0.56424655,2.97694010

>  <Name>


>  <RI>
0

>  <Rbt.Current_Directory>
/data/dnb03/galaxy_db/job_working_directory/014/442/14442412/working

>  <Rbt.Executable>
rbdock ($Id: //depot/dev/client3/rdock/2013.1/src/exe/rbdock.cxx#4 $)

>  <Rbt.Library>
libRbt.so (2013.1, Build901 2013/11/27)

>  <Rbt.Parameter_File>
/usr/local/tools/_conda/envs/__rdock@2013.1-0/share/rdock-2013.1-1/data/scripts/dock.prm

>  <Rbt.Receptor>
receptor.prm

>  <SCORE>
7.59801

>  <SCORE.INTER>
8.4

>  <SCORE.INTER.CONST>
1

>  <SCORE.INTER.POLAR>
0

>  <SCORE.INTER.REPUL>
0

>  <SCORE.INTER.ROT>
3

>  <SCORE.INTER.VDW>
0

>  <SCORE.INTER.norm>
0.494118

>  <SCORE.INTRA>
-0.801989

>  <SCORE.INTRA.DIHEDRAL>
-1.18773

>  <SCORE.INTRA.DIHEDRAL.0>
3.75464

>  <SCORE.INTRA.POLAR>
0

>  <SCORE.INTRA.POLAR.0>
0

>  <SCORE.INTRA.REPUL>
0

>  <SCORE.INTRA.REPUL.0>
0

>  <SCORE.INTRA.VDW>
-0.208124

>  <SCORE.INTRA.VDW.0>
1.8106

>  <SCORE.INTRA.norm>
-0.0471758

>  <SCORE.RESTR>


>  <SCORE.RESTR.norm>
0

>  <SCORE.SYSTEM>
0

>  <SCORE.SYSTEM.CONST>
0

>  <SCORE.SYSTEM.DIHEDRAL>
0

>  <SCORE.SYSTEM.norm>
0

>  <SCORE.heavy>
17

>  <SCORE.norm>
0.446942

>  <TransFSReceptor>
receptor

>  <TransFSScore>
0.009490

$$$$

 OpenBabel01192115203D
libRbt.so/2013.1/901 2013/11/27
 33 36  0  0  0  0  0  0  0  0999 V2000
  221.6051  189.1364  246.1229 C   0  0  0  0  0  0  0  0  0  0  0  0
  220.7094  188.0243  245.5933 C   0  0  0  0  0  0  0  0  0  0  0  0
  219.9934  187.3342  246.7485 C   0  0  0  0  0  0  0  0  0  0  0  0
  219.0603  186.2008  246.3012 C   0  0  0  0  0  0  0  0  0  0  0  0
  217.9982  186.7454  245.4463 N   0  0  0  0  0  0  0  0  0  0  0  0
  218.1254  186.6257  244.0625 C   0  0  0  0  0  0  0  0  0  0  0  0
  218.8317  185.8025  243.5084 O   0  0  0  0  0  0  0  0  0  0  0  0
  217.2614  187.6482  243.3912 C   0  0  0  0  0  0  0  0  0  0  0  0
  217.4775  188.2557  242.2070 C   0  0  0  0  0  0  0  0  0  0  0  0
  216.8526  189.4989  241.6870 C   0  0  0  0  0  0  0  0  0  0  0  0
  215.8679  190.3512  242.1651 C   0  0  0  0  0  0  0  0  0  0  0  0
  215.6006  191.5428  241.4830 C   0  0  0  0  0  0  0  0  0  0  0  0
  216.3195  191.8834  240.3324 C   0  0  0  0  0  0  0  0  0  0  0  0
  217.2968  191.0247  239.8309 C   0  0  0  0  0  0  0  0  0  0  0  0
  217.5356  189.8382  240.5111 C   0  0  0  0  0  0  0  0  0  0  0  0
  218.4549  188.8370  240.1768 N   0  0  0  0  0  0  0  0  0  0  0  0
  218.5349  187.8733  241.1849 C   0  0  0  0  0  0  0  0  0  0  0  0
  219.3031  186.9321  241.2085 O   0  0  0  0  0  0  0  0  0  0  0  0
  219.3297  188.8568  239.0137 C   0  0  0  0  0  0  0  0  0  0  0  0
  219.4310  187.5987  238.1281 C   0  0  0  0  0  0  0  0  0  0  0  0
  219.0235  187.6360  236.9660 O   0  0  0  0  0  0  0  0  0  0  0  0
  219.9890  186.4809  238.7198 N   0  0  0  0  0  0  0  0  0  0  0  0
  220.2158  185.2541  238.0558 C   0  0  0  0  0  0  0  0  0  0  0  0
  220.5479  184.1418  238.8357 C   0  0  0  0  0  0  0  0  0  0  0  0
  220.7580  182.8980  238.2349 C   0  0  0  0  0  0  0  0  0  0  0  0
  220.7175  182.7737  236.8471 C   0  0  0  0  0  0  0  0  0  0  0  0
  220.4515  183.8896  236.0457 C   0  0  0  0  0  0  0  0  0  0  0  0
  220.1711  185.1228  236.6614 C   0  0  0  0  0  0  0  0  0  0  0  0
  220.5137  183.7795  234.5448 C   0  0  0  0  0  0  0  0  0  0  0  0
  216.0207  188.0689  244.5327 S   0  0  0  0  0  0  0  0  0  0  0  0
  216.8698  187.3795  245.8976 C   0  0  0  0  0  0  0  0  0  0  0  0
  216.3127  187.5497  247.4586 S   0  0  0  0  0  0  0  0  0  0  0  0
  219.9913  186.4593  239.7304 H   0  0  0  0  0  0  0  0  0  0  0  0
  1  2  1  0  0  0  0
  2  3  1  0  0  0  0
  3  4  1  0  0  0  0
  4  5  1  0  0  0  0
  5 31  1  0  0  0  0
  5  6  1  0  0  0  0
  6  7  2  0  0  0  0
  6  8  1  0  0  0  0
  8  9  2  0  0  0  0
  8 30  1  0  0  0  0
  9 17  1  0  0  0  0
  9 10  1  0  0  0  0
 10 15  1  0  0  0  0
 10 11  2  0  0  0  0
 11 12  1  0  0  0  0
 12 13  2  0  0  0  0
 13 14  1  0  0  0  0
 14 15  2  0  0  0  0
 15 16  1  0  0  0  0
 16 17  1  0  0  0  0
 16 19  1  0  0  0  0
 17 18  2  0  0  0  0
 19 20  1  0  0  0  0
 20 21  2  0  0  0  0
 20 22  1  0  0  0  0
 22 23  1  0  0  0  0
 22 33  1  0  0  0  0
 23 28  1  0  0  0  0
 23 24  2  0  0  0  0
 24 25  1  0  0  0  0
 25 26  2  0  0  0  0
 26 27  1  0  0  0  0
 27 28  2  0  0  0  0
 27 29  1  0  0  0  0
 30 31  1  0  0  0  0
 31 32  2  0  0  0  0
M  END
>  <CHROM.1>
179.68650826,-62.15907324,99.47632719,-132.61133799,114.44821740,-168.12927719
218.50789567,187.36259238,241.69845038,-2.10803393,1.00937447,-1.43782103

>  <Name>


>  <RI>
0

>  <Rbt.Current_Directory>
/data/dnb03/galaxy_db/job_working_directory/014/442/14442413/working

>  <Rbt.Executable>
rbdock ($Id: //depot/dev/client3/rdock/2013.1/src/exe/rbdock.cxx#4 $)

>  <Rbt.Library>
libRbt.so (2013.1, Build901 2013/11/27)

>  <Rbt.Parameter_File>
/usr/local/tools/_conda/envs/__rdock@2013.1-0/share/rdock-2013.1-1/data/scripts/dock.prm

>  <Rbt.Receptor>
receptor.prm

>  <SCORE>
7.30168

>  <SCORE.INTER>
11.4

>  <SCORE.INTER.CONST>
1

>  <SCORE.INTER.POLAR>
0

>  <SCORE.INTER.REPUL>
0

>  <SCORE.INTER.ROT>
6

>  <SCORE.INTER.VDW>
0

>  <SCORE.INTER.norm>
0.35625

>  <SCORE.INTRA>
-4.09832

>  <SCORE.INTRA.DIHEDRAL>
-2.54344

>  <SCORE.INTRA.DIHEDRAL.0>
9.29346

>  <SCORE.INTRA.POLAR>
-0.898676

>  <SCORE.INTRA.POLAR.0>
0

>  <SCORE.INTRA.REPUL>
0

>  <SCORE.INTRA.REPUL.0>
0

>  <SCORE.INTRA.VDW>
0.228899

>  <SCORE.INTRA.VDW.0>
-2.40265

>  <SCORE.INTRA.norm>
-0.128072

>  <SCORE.RESTR>


>  <SCORE.RESTR.norm>
0

>  <SCORE.SYSTEM>
0

>  <SCORE.SYSTEM.CONST>
0

>  <SCORE.SYSTEM.DIHEDRAL>
0

>  <SCORE.SYSTEM.norm>
0

>  <SCORE.heavy>
32

>  <SCORE.norm>
0.228178

>  <TransFSReceptor>
receptor

>  <TransFSScore>
0.000043

$$$$

 OpenBabel01192115203D
libRbt.so/2013.1/901 2013/11/27
 41 46  0  0  0  0  0  0  0  0999 V2000
  192.2661  205.8458  258.9221 C   0  0  0  0  0  0  0  0  0  0  0  0
  190.9892  205.9383  259.5710 O   0  0  0  0  0  0  0  0  0  0  0  0
  190.8930  206.9277  260.5224 C   0  0  0  0  0  0  0  0  0  0  0  0
  190.8673  206.6179  261.8881 C   0  0  0  0  0  0  0  0  0  0  0  0
  190.9454  207.6222  262.8427 C   0  0  0  0  0  0  0  0  0  0  0  0
  191.1896  208.9265  262.4294 C   0  0  0  0  0  0  0  0  0  0  0  0
  191.1394  209.2582  261.0641 C   0  0  0  0  0  0  0  0  0  0  0  0
  190.8422  208.2825  260.1063 C   0  0  0  0  0  0  0  0  0  0  0  0
  190.3453  208.6940  258.8072 N   0  0  0  0  0  0  0  0  0  0  0  0
  190.8802  209.7054  258.0461 C   0  0  0  0  0  0  0  0  0  0  0  0
  191.8304  210.3840  258.4310 O   0  0  0  0  0  0  0  0  0  0  0  0
  190.4118  209.8873  256.6751 C   0  0  0  0  0  0  0  0  0  0  0  0
  190.6404  208.7016  256.0580 C   0  0  0  0  0  0  0  0  0  0  0  0
  190.9810  208.7355  254.0636 C   0  0  0  0  0  0  0  0  0  0  0  0
  191.7966  207.9258  253.1561 C   0  0  0  0  0  0  0  0  0  0  0  0
  192.0049  208.1831  251.7951 C   0  0  0  0  0  0  0  0  0  0  0  0
  191.4122  209.2698  251.1855 C   0  0  0  0  0  0  0  0  0  0  0  0
  190.5936  210.1108  251.9252 C   0  0  0  0  0  0  0  0  0  0  0  0
  190.3948  209.8761  253.2978 C   0  0  0  0  0  0  0  0  0  0  0  0
  189.6232  210.8481  254.1589 C   0  0  0  0  0  0  0  0  0  0  0  0
  189.9291  210.0113  255.3607 C   0  0  0  0  0  0  0  0  0  0  0  0
  189.0057  208.3051  254.8336 C   0  0  0  0  0  0  0  0  0  0  0  0
  190.1869  206.7622  254.8680 C   0  0  0  0  0  0  0  0  0  0  0  0
  191.9807  207.0175  255.5525 C   0  0  0  0  0  0  0  0  0  0  0  0
  192.8444  208.7106  255.5474 C   0  0  0  0  0  0  0  0  0  0  0  0
  191.8853  210.2996  255.3140 C   0  0  0  0  0  0  0  0  0  0  0  0
  189.9341  207.6814  256.8277 N   0  0  0  0  0  0  0  0  0  0  0  0
  189.6134  207.8735  258.0506 C   0  0  0  0  0  0  0  0  0  0  0  0
  188.0200  207.3363  258.5600 S   0  0  0  0  0  0  0  0  0  0  0  0
  187.2624  208.7653  259.3650 C   0  0  0  0  0  0  0  0  0  0  0  0
  187.9528  209.3533  260.5862 C   0  0  0  0  0  0  0  0  0  0  0  0
  188.1632  208.7390  261.6331 O   0  0  0  0  0  0  0  0  0  0  0  0
  188.3876  210.6534  260.5065 N   0  0  0  0  0  0  0  0  0  0  0  0
  188.1198  211.5720  259.4133 C   0  0  0  0  0  0  0  0  0  0  0  0
  189.2922  212.3305  258.9183 C   0  0  0  0  0  0  0  0  0  0  0  0
  189.4180  212.5790  257.5534 C   0  0  0  0  0  0  0  0  0  0  0  0
  190.5916  213.1395  257.0505 C   0  0  0  0  0  0  0  0  0  0  0  0
  191.6194  213.4676  257.9381 C   0  0  0  0  0  0  0  0  0  0  0  0
  191.4918  213.2553  259.3125 C   0  0  0  0  0  0  0  0  0  0  0  0
  190.3287  212.6797  259.8026 C   0  0  0  0  0  0  0  0  0  0  0  0
  188.7468  211.0484  261.3686 H   0  0  0  0  0  0  0  0  0  0  0  0
  1  2  1  0  0  0  0
  2  3  1  0  0  0  0
  3  8  1  0  0  0  0
  3  4  2  0  0  0  0
  4  5  1  0  0  0  0
  5  6  2  0  0  0  0
  6  7  1  0  0  0  0
  7  8  2  0  0  0  0
  8  9  1  0  0  0  0
  9 28  1  0  0  0  0
  9 10  1  0  0  0  0
 10 11  2  0  0  0  0
 10 12  1  0  0  0  0
 12 21  1  0  0  0  0
 12 13  2  0  0  0  0
 13 14  1  0  0  0  0
 13 27  1  0  0  0  0
 14 19  1  0  0  0  0
 14 15  2  0  0  0  0
 15 16  1  0  0  0  0
 16 17  2  0  0  0  0
 17 18  1  0  0  0  0
 18 19  2  0  0  0  0
 19 20  1  0  0  0  0
 20 21  1  0  0  0  0
 21 26  1  0  0  0  0
 21 22  1  0  0  0  0
 22 23  1  0  0  0  0
 23 24  1  0  0  0  0
 24 25  1  0  0  0  0
 25 26  1  0  0  0  0
 27 28  2  0  0  0  0
 28 29  1  0  0  0  0
 29 30  1  0  0  0  0
 30 31  1  0  0  0  0
 31 32  2  0  0  0  0
 31 33  1  0  0  0  0
 33 34  1  0  0  0  0
 33 41  1  0  0  0  0
 34 35  1  0  0  0  0
 35 40  1  0  0  0  0
 35 36  2  0  0  0  0
 36 37  1  0  0  0  0
 37 38  2  0  0  0  0
 38 39  1  0  0  0  0
 39 40  2  0  0  0  0
M  END
>  <CHROM.1>
-106.86837661,-141.71120496,37.97245937,-60.05425249,-60.65519541,-133.42347928
142.31662038,190.31819777,209.20958905,257.62117819,-2.58011487,1.37600242
-0.52865816

>  <Name>


>  <RI>
0

>  <Rbt.Current_Directory>
/data/dnb03/galaxy_db/job_working_directory/014/442/14442414/working

>  <Rbt.Executable>
rbdock ($Id: //depot/dev/client3/rdock/2013.1/src/exe/rbdock.cxx#4 $)

>  <Rbt.Library>
libRbt.so (2013.1, Build901 2013/11/27)

>  <Rbt.Parameter_File>
/usr/local/tools/_conda/envs/__rdock@2013.1-0/share/rdock-2013.1-1/data/scripts/dock.prm

>  <Rbt.Receptor>
receptor.prm

>  <SCORE>
6.50372

>  <SCORE.INTER>
12.4

>  <SCORE.INTER.CONST>
1

>  <SCORE.INTER.POLAR>
0

>  <SCORE.INTER.REPUL>
0

>  <SCORE.INTER.ROT>
7

>  <SCORE.INTER.VDW>
0

>  <SCORE.INTER.norm>
0.31

>  <SCORE.INTRA>
-5.89628

>  <SCORE.INTRA.DIHEDRAL>
3.27701

>  <SCORE.INTRA.DIHEDRAL.0>
6.56863

>  <SCORE.INTRA.POLAR>
0

>  <SCORE.INTRA.POLAR.0>
0

>  <SCORE.INTRA.REPUL>
0

>  <SCORE.INTRA.REPUL.0>
0

>  <SCORE.INTRA.VDW>
-7.53478

>  <SCORE.INTRA.VDW.0>
-2.6358

>  <SCORE.INTRA.norm>
-0.147407

>  <SCORE.RESTR>


>  <SCORE.RESTR.norm>
0

>  <SCORE.SYSTEM>
0

>  <SCORE.SYSTEM.CONST>
0

>  <SCORE.SYSTEM.DIHEDRAL>
0

>  <SCORE.SYSTEM.norm>
0

>  <SCORE.heavy>
40

>  <SCORE.norm>
0.162593

>  <TransFSReceptor>
receptor

>  <TransFSScore>
0.000062

$$$$

 OpenBabel01192115203D
libRbt.so/2013.1/901 2013/11/27
 44 43  0  0  0  0  0  0  0  0999 V2000
  190.4697  211.3036  260.3325 C   0  0  0  0  0  0  0  0  0  0  0  0
  190.5853  212.4814  259.3821 C   0  0  0  0  0  0  0  0  0  0  0  0
  189.4981  212.4222  258.3160 C   0  0  0  0  0  0  0  0  0  0  0  0
  189.5823  213.6300  257.3912 C   0  0  0  0  0  0  0  0  0  0  0  0
  188.5365  213.5261  256.2896 C   0  0  0  0  0  0  0  0  0  0  0  0
  188.5850  214.7584  255.4008 C   0  0  0  0  0  0  0  0  0  0  0  0
  187.5777  214.6295  254.2708 C   0  0  0  0  0  0  0  0  0  0  0  0
  187.7045  215.8063  253.3182 C   0  0  0  0  0  0  0  0  0  0  0  0
  186.6937  215.6746  252.1915 C   0  0  0  0  0  0  0  0  0  0  0  0
  186.7909  216.8690  251.2575 C   0  0  0  0  0  0  0  0  0  0  0  0
  185.7316  216.7706  250.1700 C   0  0  0  0  0  0  0  0  0  0  0  0
  185.9125  217.8873  249.1560 C   0  0  0  0  0  0  0  0  0  0  0  0
  184.7629  217.8982  248.1564 C   0  0  0  0  0  0  0  0  0  0  0  0
  185.0753  218.8668  247.0279 C   0  0  0  0  0  0  0  0  0  0  0  0
  184.0045  218.8438  245.9523 C   0  0  0  0  0  0  0  0  0  0  0  0
  184.0283  217.4938  245.2910 C   0  0  0  0  0  0  0  0  0  0  0  0
  184.4019  217.3131  244.1465 O   0  0  0  0  0  0  0  0  0  0  0  0
  183.5792  216.5271  246.1305 O   0  0  0  0  0  0  0  0  0  0  0  0
  183.7006  215.1821  245.6345 C   0  0  0  0  0  0  0  0  0  0  0  0
  183.4653  214.1763  246.7694 C   0  0  0  0  0  0  0  0  0  0  0  0
  182.0699  214.5030  247.3404 C   0  0  0  0  0  0  0  0  0  0  0  0
  182.0539  215.6787  248.1485 O   0  0  0  0  0  0  0  0  0  0  0  0
  180.8515  215.9745  248.7107 C   0  0  0  0  0  0  0  0  0  0  0  0
  179.8964  215.2179  248.7816 O   0  0  0  0  0  0  0  0  0  0  0  0
  180.8830  217.3656  249.2578 C   0  0  0  0  0  0  0  0  0  0  0  0
  182.0764  217.5235  250.1839 C   0  0  0  0  0  0  0  0  0  0  0  0
  181.9165  216.6412  251.4103 C   0  0  0  0  0  0  0  0  0  0  0  0
  183.0800  216.8840  252.3611 C   0  0  0  0  0  0  0  0  0  0  0  0
  182.9897  215.9342  253.5410 C   0  0  0  0  0  0  0  0  0  0  0  0
  184.1507  216.1744  254.4888 C   0  0  0  0  0  0  0  0  0  0  0  0
  184.1356  215.1393  255.5985 C   0  0  0  0  0  0  0  0  0  0  0  0
  185.2349  215.4398  256.6021 C   0  0  0  0  0  0  0  0  0  0  0  0
  185.1828  214.4408  257.7444 C   0  0  0  0  0  0  0  0  0  0  0  0
  186.3178  214.7053  258.7183 C   0  0  0  0  0  0  0  0  0  0  0  0
  186.3044  213.6734  259.8400 C   0  0  0  0  0  0  0  0  0  0  0  0
  187.4179  213.9561  260.8344 C   0  0  0  0  0  0  0  0  0  0  0  0
  187.3472  212.9638  261.9915 C   0  0  0  0  0  0  0  0  0  0  0  0
  188.4929  213.1923  262.9688 C   0  0  0  0  0  0  0  0  0  0  0  0
  188.5484  212.0800  263.9979 C   0  0  0  0  0  0  0  0  0  0  0  0
  183.4967  212.8033  246.3135 O   0  0  0  0  0  0  0  0  0  0  0  0
  183.3523  211.5167  247.3962 Si  0  0  0  0  0  0  0  0  0  0  0  0
  181.5488  211.1137  247.7200 C   0  0  0  0  0  0  0  0  0  0  0  0
  184.2441  209.9634  246.7939 C   0  0  0  0  0  0  0  0  0  0  0  0
  184.2014  211.8899  249.0514 C   0  0  0  0  0  0  0  0  0  0  0  0
  1  2  1  0  0  0  0
  2  3  1  0  0  0  0
  3  4  1  0  0  0  0
  4  5  1  0  0  0  0
  5  6  1  0  0  0  0
  6  7  1  0  0  0  0
  7  8  1  0  0  0  0
  8  9  1  0  0  0  0
  9 10  1  0  0  0  0
 10 11  1  0  0  0  0
 11 12  1  0  0  0  0
 12 13  1  0  0  0  0
 13 14  1  0  0  0  0
 14 15  1  0  0  0  0
 15 16  1  0  0  0  0
 16 17  2  0  0  0  0
 16 18  1  0  0  0  0
 18 19  1  0  0  0  0
 19 20  1  0  0  0  0
 20 21  1  0  0  0  0
 20 40  1  0  0  0  0
 21 22  1  0  0  0  0
 22 23  1  0  0  0  0
 23 24  2  0  0  0  0
 23 25  1  0  0  0  0
 25 26  1  0  0  0  0
 26 27  1  0  0  0  0
 27 28  1  0  0  0  0
 28 29  1  0  0  0  0
 29 30  1  0  0  0  0
 30 31  1  0  0  0  0
 31 32  1  0  0  0  0
 32 33  1  0  0  0  0
 33 34  1  0  0  0  0
 34 35  1  0  0  0  0
 35 36  1  0  0  0  0
 36 37  1  0  0  0  0
 37 38  1  0  0  0  0
 38 39  1  0  0  0  0
 40 41  1  0  0  0  0
 41 42  1  0  0  0  0
 41 43  1  0  0  0  0
 41 44  1  0  0  0  0
M  END
>  <CHROM.1>
177.98575656,177.20957792,177.74519333,177.83896302,-175.36921045,-179.89343879
178.43756840,-177.16414975,-174.39625084,-173.31067689,-170.86590137,175.99144035
-65.95196127,-110.60032084,-173.61294977,167.25268504,56.65905340,-75.09384066
176.41772149,-177.73031620,14.10117167,-53.09934598,-65.59785965,-176.44845512
-175.73294645,179.92691763,-174.63341038,-175.87374910,177.54936432,177.64204109
-177.83850369,-178.60307997,176.91590843,177.51503685,-171.29703240,85.92241800
185.09483555,214.82325275,252.27176405,-0.15143334,1.19921846,-2.81289197

>  <Name>


>  <RI>
0

>  <Rbt.Current_Directory>
/data/dnb03/galaxy_db/job_working_directory/014/442/14442415/working

>  <Rbt.Executable>
rbdock ($Id: //depot/dev/client3/rdock/2013.1/src/exe/rbdock.cxx#4 $)

>  <Rbt.Library>
libRbt.so (2013.1, Build901 2013/11/27)

>  <Rbt.Parameter_File>
/usr/local/tools/_conda/envs/__rdock@2013.1-0/share/rdock-2013.1-1/data/scripts/dock.prm

>  <Rbt.Receptor>
receptor.prm

>  <SCORE>
34.4046

>  <SCORE.INTER>
41.4

>  <SCORE.INTER.CONST>
1

>  <SCORE.INTER.POLAR>
0

>  <SCORE.INTER.REPUL>
0

>  <SCORE.INTER.ROT>
36

>  <SCORE.INTER.VDW>
0

>  <SCORE.INTER.norm>
0.940909

>  <SCORE.INTRA>
-6.99538

>  <SCORE.INTRA.DIHEDRAL>
-5.23434

>  <SCORE.INTRA.DIHEDRAL.0>
13.3017

>  <SCORE.INTRA.POLAR>
0

>  <SCORE.INTRA.POLAR.0>
0

>  <SCORE.INTRA.REPUL>
0.0277816

>  <SCORE.INTRA.REPUL.0>
0

>  <SCORE.INTRA.VDW>
-4.51712

>  <SCORE.INTRA.VDW.0>
-3.48201

>  <SCORE.INTRA.norm>
-0.158986

>  <SCORE.RESTR>


>  <SCORE.RESTR.norm>
0

>  <SCORE.SYSTEM>
0

>  <SCORE.SYSTEM.CONST>
0

>  <SCORE.SYSTEM.DIHEDRAL>
0

>  <SCORE.SYSTEM.norm>
0

>  <SCORE.heavy>
44

>  <SCORE.norm>
0.781923

>  <TransFSReceptor>
receptor

>  <TransFSScore>
0.028595

$$$$

 OpenBabel01192115203D
libRbt.so/2013.1/901 2013/11/27
 22 23  0  0  0  0  0  0  0  0999 V2000
  261.4425  191.1257  275.8981 C   0  0  0  0  0  0  0  0  0  0  0  0
  262.2288  191.5921  274.7018 C   0  0  0  0  0  0  0  0  0  0  0  0
  262.1900  192.7714  274.3456 O   0  0  0  0  0  0  0  0  0  0  0  0
  263.1072  190.6061  273.9940 C   0  0  0  0  0  0  0  0  0  0  0  0
  264.5206  191.0602  273.8083 C   0  0  0  0  0  0  0  0  0  0  0  0
  264.8485  192.1124  273.2759 O   0  0  0  0  0  0  0  0  0  0  0  0
  265.3828  190.0714  274.1702 O   0  0  0  0  0  0  0  0  0  0  0  0
  266.7833  190.3910  274.1115 C   0  0  0  0  0  0  0  0  0  0  0  0
  267.2413  191.0831  275.4286 C   0  0  0  0  0  0  0  0  0  0  0  0
  267.2837  190.0838  276.6102 C   0  0  0  0  0  0  0  0  0  0  0  0
  268.7063  191.5408  275.2381 C   0  0  0  0  0  0  0  0  0  0  0  0
  266.3354  192.2296  275.7534 N   0  0  0  0  0  0  0  0  0  0  0  0
  265.1459  192.1102  276.4413 C   0  0  0  0  0  0  0  0  0  0  0  0
  264.6284  191.1399  276.9615 O   0  0  0  0  0  0  0  0  0  0  0  0
  264.5040  193.4203  276.4371 C   0  0  0  0  0  0  0  0  0  0  0  0
  263.3516  193.8600  277.0567 C   0  0  0  0  0  0  0  0  0  0  0  0
  263.0024  195.2039  276.8830 C   0  0  0  0  0  0  0  0  0  0  0  0
  263.8028  196.0606  276.0982 C   0  0  0  0  0  0  0  0  0  0  0  0
  264.9541  195.5828  275.4646 C   0  0  0  0  0  0  0  0  0  0  0  0
  265.2758  194.2526  275.6574 C   0  0  0  0  0  0  0  0  0  0  0  0
  266.3866  193.4597  275.1438 C   0  0  0  0  0  0  0  0  0  0  0  0
  267.1461  193.8853  274.2932 O   0  0  0  0  0  0  0  0  0  0  0  0
  1  2  1  0  0  0  0
  2  3  2  0  0  0  0
  2  4  1  0  0  0  0
  4  5  1  0  0  0  0
  5  6  2  0  0  0  0
  5  7  1  0  0  0  0
  7  8  1  0  0  0  0
  8  9  1  0  0  0  0
  9 10  1  0  0  0  0
  9 11  1  0  0  0  0
  9 12  1  0  0  0  0
 12 21  1  0  0  0  0
 12 13  1  0  0  0  0
 13 14  2  0  0  0  0
 13 15  1  0  0  0  0
 15 20  1  0  0  0  0
 15 16  2  0  0  0  0
 16 17  1  0  0  0  0
 17 18  2  0  0  0  0
 18 19  1  0  0  0  0
 19 20  2  0  0  0  0
 20 21  1  0  0  0  0
 21 22  2  0  0  0  0
M  END
>  <CHROM.1>
-127.65563181,-54.28499010,-176.81744159,85.36873821,71.47884617,85.15963198
264.93690755,192.37297404,275.32012817,2.49799909,-0.01264333,0.29424683

>  <Name>


>  <RI>
0

>  <Rbt.Current_Directory>
/data/dnb03/galaxy_db/job_working_directory/014/442/14442416/working

>  <Rbt.Executable>
rbdock ($Id: //depot/dev/client3/rdock/2013.1/src/exe/rbdock.cxx#4 $)

>  <Rbt.Library>
libRbt.so (2013.1, Build901 2013/11/27)

>  <Rbt.Parameter_File>
/usr/local/tools/_conda/envs/__rdock@2013.1-0/share/rdock-2013.1-1/data/scripts/dock.prm

>  <Rbt.Receptor>
receptor.prm

>  <SCORE>
6.1817

>  <SCORE.INTER>
11.4

>  <SCORE.INTER.CONST>
1

>  <SCORE.INTER.POLAR>
0

>  <SCORE.INTER.REPUL>
0

>  <SCORE.INTER.ROT>
6

>  <SCORE.INTER.VDW>
0

>  <SCORE.INTER.norm>
0.518182

>  <SCORE.INTRA>
-5.2183

>  <SCORE.INTRA.DIHEDRAL>
-3.33697

>  <SCORE.INTRA.DIHEDRAL.0>
12.8041

>  <SCORE.INTRA.POLAR>
0

>  <SCORE.INTRA.POLAR.0>
0

>  <SCORE.INTRA.REPUL>
0

>  <SCORE.INTRA.REPUL.0>
0

>  <SCORE.INTRA.VDW>
-3.54982

>  <SCORE.INTRA.VDW.0>
0.257235

>  <SCORE.INTRA.norm>
-0.237196

>  <SCORE.RESTR>


>  <SCORE.RESTR.norm>
0

>  <SCORE.SYSTEM>
0

>  <SCORE.SYSTEM.CONST>
0

>  <SCORE.SYSTEM.DIHEDRAL>
0

>  <SCORE.SYSTEM.norm>
0

>  <SCORE.heavy>
22

>  <SCORE.norm>
0.280986

>  <TransFSReceptor>
receptor

>  <TransFSScore>
0.058433

$$$$

 OpenBabel01192115203D
libRbt.so/2013.1/901 2013/11/27
 36 39  0  0  0  0  0  0  0  0999 V2000
  191.9966  198.7980  239.2135 C   0  0  0  0  0  0  0  0  0  0  0  0
  192.6004  198.6635  240.6006 C   0  0  0  0  0  0  0  0  0  0  0  0
  191.8000  197.7781  241.3942 O   0  0  0  0  0  0  0  0  0  0  0  0
  192.2253  197.5689  242.6842 C   0  0  0  0  0  0  0  0  0  0  0  0
  191.6467  196.4774  243.3603 C   0  0  0  0  0  0  0  0  0  0  0  0
  192.0765  196.1214  244.6489 C   0  0  0  0  0  0  0  0  0  0  0  0
  193.1138  196.8612  245.2270 C   0  0  0  0  0  0  0  0  0  0  0  0
  193.6267  198.0005  244.6104 C   0  0  0  0  0  0  0  0  0  0  0  0
  193.1726  198.3590  243.3422 C   0  0  0  0  0  0  0  0  0  0  0  0
  193.6983  196.3976  246.4070 N   0  0  0  0  0  0  0  0  0  0  0  0
  193.3248  195.2258  247.0103 C   0  0  0  0  0  0  0  0  0  0  0  0
  194.0431  194.7083  247.8605 O   0  0  0  0  0  0  0  0  0  0  0  0
  191.9810  194.6630  246.6410 C   0  0  0  0  0  0  0  0  0  0  0  0
  191.4379  195.0714  245.4724 C   0  0  0  0  0  0  0  0  0  0  0  0
  191.3107  193.9172  247.7877 C   0  0  0  0  0  0  0  0  0  0  0  0
  191.2357  194.5615  249.1128 N   0  0  0  0  0  0  0  0  0  0  0  0
  189.9935  195.2820  249.4950 C   0  0  0  0  0  0  0  0  0  0  0  0
  189.9426  196.8240  249.4631 C   0  0  0  0  0  0  0  0  0  0  0  0
  190.1942  197.5158  248.1425 C   0  0  0  0  0  0  0  0  0  0  0  0
  191.2448  198.4437  248.0536 C   0  0  0  0  0  0  0  0  0  0  0  0
  191.5086  199.1174  246.8602 C   0  0  0  0  0  0  0  0  0  0  0  0
  190.7129  198.8852  245.7404 C   0  0  0  0  0  0  0  0  0  0  0  0
  189.6487  197.9902  245.8225 C   0  0  0  0  0  0  0  0  0  0  0  0
  189.3831  197.3148  247.0183 C   0  0  0  0  0  0  0  0  0  0  0  0
  192.1399  194.1380  250.0912 C   0  0  0  0  0  0  0  0  0  0  0  0
  192.9875  193.2701  249.9007 O   0  0  0  0  0  0  0  0  0  0  0  0
  191.9938  194.7471  251.3131 N   0  0  0  0  0  0  0  0  0  0  0  0
  192.4741  196.0868  251.5711 C   0  0  0  0  0  0  0  0  0  0  0  0
  193.6928  196.4067  250.7446 C   0  0  0  0  0  0  0  0  0  0  0  0
  194.8749  195.6609  250.8588 C   0  0  0  0  0  0  0  0  0  0  0  0
  196.0080  195.9979  250.1159 C   0  0  0  0  0  0  0  0  0  0  0  0
  195.9731  197.0841  249.2407 C   0  0  0  0  0  0  0  0  0  0  0  0
  194.8044  197.8248  249.0999 C   0  0  0  0  0  0  0  0  0  0  0  0
  193.6677  197.4887  249.8453 C   0  0  0  0  0  0  0  0  0  0  0  0
  194.5590  196.8095  246.7380 H   0  0  0  0  0  0  0  0  0  0  0  0
  191.1996  194.4644  251.8631 H   0  0  0  0  0  0  0  0  0  0  0  0
  1  2  1  0  0  0  0
  2  3  1  0  0  0  0
  3  4  1  0  0  0  0
  4  9  1  0  0  0  0
  4  5  2  0  0  0  0
  5  6  1  0  0  0  0
  6 14  1  0  0  0  0
  6  7  2  0  0  0  0
  7  8  1  0  0  0  0
  7 10  1  0  0  0  0
  8  9  2  0  0  0  0
 10 11  1  0  0  0  0
 10 35  1  0  0  0  0
 11 12  2  0  0  0  0
 11 13  1  0  0  0  0
 13 14  2  0  0  0  0
 13 15  1  0  0  0  0
 15 16  1  0  0  0  0
 16 17  1  0  0  0  0
 16 25  1  0  0  0  0
 17 18  1  0  0  0  0
 18 19  1  0  0  0  0
 19 24  1  0  0  0  0
 19 20  2  0  0  0  0
 20 21  1  0  0  0  0
 21 22  2  0  0  0  0
 22 23  1  0  0  0  0
 23 24  2  0  0  0  0
 25 26  2  0  0  0  0
 25 27  1  0  0  0  0
 27 28  1  0  0  0  0
 27 36  1  0  0  0  0
 28 29  1  0  0  0  0
 29 34  1  0  0  0  0
 29 30  2  0  0  0  0
 30 31  1  0  0  0  0
 31 32  2  0  0  0  0
 32 33  1  0  0  0  0
 33 34  2  0  0  0  0
M  END
>  <CHROM.1>
-179.56630592,-165.41360926,48.94088758,96.67191276,-103.31831788,60.05076675
-122.04083758,-77.57663171,-30.65773727,-60.45129942,192.36841219,196.54188621
247.00818665,-1.68416487,0.05941401,1.88909752

>  <Name>


>  <RI>
0

>  <Rbt.Current_Directory>
/data/dnb03/galaxy_db/job_working_directory/014/442/14442417/working

>  <Rbt.Executable>
rbdock ($Id: //depot/dev/client3/rdock/2013.1/src/exe/rbdock.cxx#4 $)

>  <Rbt.Library>
libRbt.so (2013.1, Build901 2013/11/27)

>  <Rbt.Parameter_File>
/usr/local/tools/_conda/envs/__rdock@2013.1-0/share/rdock-2013.1-1/data/scripts/dock.prm

>  <Rbt.Receptor>
receptor.prm

>  <SCORE>
6.21173

>  <SCORE.INTER>
15.4

>  <SCORE.INTER.CONST>
1

>  <SCORE.INTER.POLAR>
0

>  <SCORE.INTER.REPUL>
0

>  <SCORE.INTER.ROT>
10

>  <SCORE.INTER.VDW>
0

>  <SCORE.INTER.norm>
0.452941

>  <SCORE.INTRA>
-9.18827

>  <SCORE.INTRA.DIHEDRAL>
-0.313999

>  <SCORE.INTRA.DIHEDRAL.0>
7.33421

>  <SCORE.INTRA.POLAR>
0

>  <SCORE.INTRA.POLAR.0>
0

>  <SCORE.INTRA.REPUL>
0

>  <SCORE.INTRA.REPUL.0>
0

>  <SCORE.INTRA.VDW>
-9.03127

>  <SCORE.INTRA.VDW.0>
-0.5971

>  <SCORE.INTRA.norm>
-0.270243

>  <SCORE.RESTR>


>  <SCORE.RESTR.norm>
0

>  <SCORE.SYSTEM>
0

>  <SCORE.SYSTEM.CONST>
0

>  <SCORE.SYSTEM.DIHEDRAL>
0

>  <SCORE.SYSTEM.norm>
0

>  <SCORE.heavy>
34

>  <SCORE.norm>
0.182698

>  <TransFSReceptor>
receptor

>  <TransFSScore>
0.000122

$$$$

 OpenBabel01192115203D
libRbt.so/2013.1/901 2013/11/27
 23 22  0  0  0  0  0  0  0  0999 V2000
  190.1169  222.8261  252.2302 C   0  0  0  0  0  0  0  0  0  0  0  0
  190.6759  221.8052  251.2652 C   0  0  0  0  0  0  0  0  0  0  0  0
  190.0932  220.4169  251.5254 C   0  0  0  0  0  0  0  0  0  0  0  0
  190.6873  219.4636  250.5141 C   0  0  0  0  0  0  0  0  0  0  0  0
  190.2095  218.0187  250.6447 C   0  0  0  0  0  0  0  0  0  0  0  0
  190.9071  217.3257  249.5619 C   0  0  0  0  0  0  0  0  0  0  0  0
  191.2263  216.9353  248.4862 C   0  0  0  0  0  0  0  0  0  0  0  0
  191.5066  216.5217  247.1559 C   0  0  0  0  0  0  0  0  0  0  0  0
  192.7496  216.3969  246.6722 C   0  0  0  0  0  0  0  0  0  0  0  0
  192.9778  216.1873  245.2007 C   0  0  1  0  0  0  0  0  0  0  0  0
  193.8135  217.3225  244.5884 C   0  0  0  0  0  0  0  0  0  0  0  0
  193.0107  218.6326  244.5011 C   0  0  0  0  0  0  0  0  0  0  0  0
  192.8247  219.3464  245.8358 C   0  0  0  0  0  0  0  0  0  0  0  0
  191.9481  220.5751  245.6545 C   0  0  0  0  0  0  0  0  0  0  0  0
  191.6780  221.2742  246.9737 C   0  0  0  0  0  0  0  0  0  0  0  0
  190.7898  222.4907  246.7477 C   0  0  0  0  0  0  0  0  0  0  0  0
  190.5526  223.2438  248.0497 C   0  0  0  0  0  0  0  0  0  0  0  0
  191.8173  223.9178  248.5189 C   0  0  0  0  0  0  0  0  0  0  0  0
  192.0964  225.0961  248.3481 O   0  0  0  0  0  0  0  0  0  0  0  0
  192.6055  223.0126  249.1628 O   0  0  0  0  0  0  0  0  0  0  0  0
  193.8343  223.5676  249.6297 C   0  0  0  0  0  0  0  0  0  0  0  0
  193.6159  214.9344  245.0049 O   0  0  0  0  0  0  0  0  0  0  0  0
  193.7223  214.7991  244.0506 H   0  0  0  0  0  0  0  0  0  0  0  0
  1  2  1  0  0  0  0
  2  3  1  0  0  0  0
  3  4  1  0  0  0  0
  4  5  1  0  0  0  0
  5  6  1  0  0  0  0
  6  7  3  0  0  0  0
  7  8  1  0  0  0  0
  8  9  2  0  0  0  0
 10  9  1  1  0  0  0
 10 11  1  0  0  0  0
 10 22  1  0  0  0  0
 11 12  1  0  0  0  0
 12 13  1  0  0  0  0
 13 14  1  0  0  0  0
 14 15  1  0  0  0  0
 15 16  1  0  0  0  0
 16 17  1  0  0  0  0
 17 18  1  0  0  0  0
 18 19  2  0  0  0  0
 18 20  1  0  0  0  0
 20 21  1  0  0  0  0
 22 23  1  0  0  0  0
M  END
>  <CHROM.1>
179.34836216,179.63717744,179.31300463,-74.95741021,147.29934389,119.32175210
-71.21871639,177.70650432,74.88296740,-176.40596784,177.00245629,-179.58458482
-177.59282930,69.44124425,98.70920974,179.41191750,191.83579518,220.03955108
248.00858158,2.05017078,1.14226885,0.13131877

>  <Name>


>  <RI>
0

>  <Rbt.Current_Directory>
/data/dnb03/galaxy_db/job_working_directory/014/442/14442418/working

>  <Rbt.Executable>
rbdock ($Id: //depot/dev/client3/rdock/2013.1/src/exe/rbdock.cxx#4 $)

>  <Rbt.Library>
libRbt.so (2013.1, Build901 2013/11/27)

>  <Rbt.Parameter_File>
/usr/local/tools/_conda/envs/__rdock@2013.1-0/share/rdock-2013.1-1/data/scripts/dock.prm

>  <Rbt.Receptor>
receptor.prm

>  <SCORE>
18.0687

>  <SCORE.INTER>
20.4

>  <SCORE.INTER.CONST>
1

>  <SCORE.INTER.POLAR>
0

>  <SCORE.INTER.REPUL>
0

>  <SCORE.INTER.ROT>
15

>  <SCORE.INTER.VDW>
0

>  <SCORE.INTER.norm>
0.927273

>  <SCORE.INTRA>
-2.33131

>  <SCORE.INTRA.DIHEDRAL>
1.26669

>  <SCORE.INTRA.DIHEDRAL.0>
2.11699

>  <SCORE.INTRA.POLAR>
0

>  <SCORE.INTRA.POLAR.0>
0

>  <SCORE.INTRA.REPUL>
0

>  <SCORE.INTRA.REPUL.0>
0

>  <SCORE.INTRA.VDW>
-2.96466

>  <SCORE.INTRA.VDW.0>
1.61008

>  <SCORE.INTRA.norm>
-0.105969

>  <SCORE.RESTR>


>  <SCORE.RESTR.norm>
0

>  <SCORE.SYSTEM>
0

>  <SCORE.SYSTEM.CONST>
0

>  <SCORE.SYSTEM.DIHEDRAL>
0

>  <SCORE.SYSTEM.norm>
0

>  <SCORE.heavy>
22

>  <SCORE.norm>
0.821304

>  <TransFSReceptor>
receptor

>  <TransFSScore>
0.005241

$$$$

 OpenBabel01192115203D
libRbt.so/2013.1/901 2013/11/27
 25 26  0  0  0  0  0  0  0  0999 V2000
  194.1960  211.4160  254.2826 C   0  0  0  0  0  0  0  0  0  0  0  0
  195.1231  212.2076  254.9712 C   0  0  0  0  0  0  0  0  0  0  0  0
  196.4239  211.7269  255.1602 C   0  0  0  0  0  0  0  0  0  0  0  0
  197.3678  212.5012  255.8380 C   0  0  0  0  0  0  0  0  0  0  0  0
  197.0352  213.7488  256.3554 C   0  0  0  0  0  0  0  0  0  0  0  0
  195.7391  214.2283  256.1723 C   0  0  0  0  0  0  0  0  0  0  0  0
  194.7466  213.4890  255.4667 C   0  0  0  0  0  0  0  0  0  0  0  0
  193.4053  213.9334  255.2412 C   0  0  0  0  0  0  0  0  0  0  0  0
  192.5081  213.1379  254.5213 C   0  0  0  0  0  0  0  0  0  0  0  0
  192.9011  211.8833  254.0694 C   0  0  0  0  0  0  0  0  0  0  0  0
  191.7645  210.9089  253.1285 S   0  0  0  0  0  0  0  0  0  0  0  0
  190.4457  211.1059  253.6909 O   0  0  0  0  0  0  0  0  0  0  0  0
  192.0544  211.1354  251.7316 O   0  0  0  0  0  0  0  0  0  0  0  0
  192.1514  209.3850  253.4932 O   0  0  0  0  0  0  0  0  0  0  0  0
  193.0133  215.2609  255.5220 N   0  0  0  0  0  0  0  0  0  0  0  0
  195.4128  215.4421  256.7321 O   0  0  0  0  0  0  0  0  0  0  0  0
  198.9894  211.8559  256.1179 S   0  0  0  0  0  0  0  0  0  0  0  0
  199.9249  212.9554  256.0488 O   0  0  0  0  0  0  0  0  0  0  0  0
  198.9127  210.9659  257.2526 O   0  0  0  0  0  0  0  0  0  0  0  0
  199.2886  210.9765  254.7968 O   0  0  0  0  0  0  0  0  0  0  0  0
  192.0435  209.2718  254.4610 H   0  0  0  0  0  0  0  0  0  0  0  0
  192.3553  215.2868  256.3054 H   0  0  0  0  0  0  0  0  0  0  0  0
  192.6857  215.7820  254.7172 H   0  0  0  0  0  0  0  0  0  0  0  0
  194.5110  215.6878  256.4647 H   0  0  0  0  0  0  0  0  0  0  0  0
  199.2666  211.5840  254.0271 H   0  0  0  0  0  0  0  0  0  0  0  0
  1 10  1  0  0  0  0
  1  2  2  0  0  0  0
  2  7  1  0  0  0  0
  2  3  1  0  0  0  0
  3  4  2  0  0  0  0
  4  5  1  0  0  0  0
  4 17  1  0  0  0  0
  5  6  2  0  0  0  0
  6  7  1  0  0  0  0
  6 16  1  0  0  0  0
  7  8  2  0  0  0  0
  8  9  1  0  0  0  0
  8 15  1  0  0  0  0
  9 10  2  0  0  0  0
 10 11  1  0  0  0  0
 11 12  2  0  0  0  0
 11 13  2  0  0  0  0
 11 14  1  0  0  0  0
 14 21  1  0  0  0  0
 15 22  1  0  0  0  0
 15 23  1  0  0  0  0
 16 24  1  0  0  0  0
 17 18  2  0  0  0  0
 17 19  2  0  0  0  0
 17 20  1  0  0  0  0
 20 25  1  0  0  0  0
M  END
>  <CHROM.1>
145.77212429,175.22466393,-112.48769257,145.55718591,59.66128513,61.43150622
195.11503183,212.25872129,254.96667462,-2.86739031,-0.28879220,0.44991831

>  <Name>


>  <RI>
0

>  <Rbt.Current_Directory>
/data/dnb03/galaxy_db/job_working_directory/014/442/14442419/working

>  <Rbt.Executable>
rbdock ($Id: //depot/dev/client3/rdock/2013.1/src/exe/rbdock.cxx#4 $)

>  <Rbt.Library>
libRbt.so (2013.1, Build901 2013/11/27)

>  <Rbt.Parameter_File>
/usr/local/tools/_conda/envs/__rdock@2013.1-0/share/rdock-2013.1-1/data/scripts/dock.prm

>  <Rbt.Receptor>
receptor.prm

>  <SCORE>
5.81492

>  <SCORE.INTER>
8.4

>  <SCORE.INTER.CONST>
1

>  <SCORE.INTER.POLAR>
0

>  <SCORE.INTER.REPUL>
0

>  <SCORE.INTER.ROT>
3

>  <SCORE.INTER.VDW>
0

>  <SCORE.INTER.norm>
0.42

>  <SCORE.INTRA>
-2.58508

>  <SCORE.INTRA.DIHEDRAL>
-2.40495

>  <SCORE.INTRA.DIHEDRAL.0>
5.12513

>  <SCORE.INTRA.POLAR>
-0.24713

>  <SCORE.INTRA.POLAR.0>
-0.709162

>  <SCORE.INTRA.REPUL>
0

>  <SCORE.INTRA.REPUL.0>
0

>  <SCORE.INTRA.VDW>
-0.542369

>  <SCORE.INTRA.VDW.0>
-0.928306

>  <SCORE.INTRA.norm>
-0.129254

>  <SCORE.RESTR>


>  <SCORE.RESTR.norm>
0

>  <SCORE.SYSTEM>
0

>  <SCORE.SYSTEM.CONST>
0

>  <SCORE.SYSTEM.DIHEDRAL>
0

>  <SCORE.SYSTEM.norm>
0

>  <SCORE.heavy>
20

>  <SCORE.norm>
0.290746

>  <TransFSReceptor>
receptor

>  <TransFSScore>
0.001780

$$$$

 OpenBabel01192115203D
libRbt.so/2013.1/901 2013/11/27
 29 32  0  0  0  0  0  0  0  0999 V2000
  209.0734  178.5700  247.3275 C   0  0  0  0  0  0  0  0  0  0  0  0
  209.3417  179.8907  248.0232 C   0  0  0  0  0  0  0  0  0  0  0  0
  208.9994  179.7556  249.4010 O   0  0  0  0  0  0  0  0  0  0  0  0
  209.1768  180.8545  250.1927 C   0  0  0  0  0  0  0  0  0  0  0  0
  209.4457  180.6194  251.5431 C   0  0  0  0  0  0  0  0  0  0  0  0
  209.6883  181.7064  252.3811 C   0  0  0  0  0  0  0  0  0  0  0  0
  209.8276  183.0180  251.8988 C   0  0  0  0  0  0  0  0  0  0  0  0
  209.4062  183.2546  250.5777 C   0  0  0  0  0  0  0  0  0  0  0  0
  209.0924  182.1739  249.7345 C   0  0  0  0  0  0  0  0  0  0  0  0
  209.2888  184.5696  250.1320 C   0  0  0  0  0  0  0  0  0  0  0  0
  209.5292  185.6330  251.0011 C   0  0  0  0  0  0  0  0  0  0  0  0
  210.0066  185.4281  252.3161 C   0  0  0  0  0  0  0  0  0  0  0  0
  210.2975  184.0933  252.7072 C   0  0  0  0  0  0  0  0  0  0  0  0
  211.0544  183.9112  253.8403 N   0  3  0  0  0  0  0  0  0  0  0  0
  211.2355  184.9077  254.7234 C   0  0  0  0  0  0  0  0  0  0  0  0
  210.8081  186.1991  254.4738 C   0  0  0  0  0  0  0  0  0  0  0  0
  211.0251  187.2062  255.4280 C   0  0  0  0  0  0  0  0  0  0  0  0
  210.6863  188.5437  255.1804 C   0  0  0  0  0  0  0  0  0  0  0  0
  210.0596  188.8532  253.9725 C   0  0  0  0  0  0  0  0  0  0  0  0
  209.8398  187.8333  253.0290 C   0  0  0  0  0  0  0  0  0  0  0  0
  210.2153  186.4885  253.2437 C   0  0  0  0  0  0  0  0  0  0  0  0
  209.6390  190.0577  253.4837 O   0  0  0  0  0  0  0  0  0  0  0  0
  209.1826  191.0752  254.3571 C   0  0  0  0  0  0  0  0  0  0  0  0
  210.9527  189.5290  256.0927 O   0  0  0  0  0  0  0  0  0  0  0  0
  212.3326  189.8380  256.3058 C   0  0  0  0  0  0  0  0  0  0  0  0
  211.9009  182.7113  254.0515 C   0  0  0  0  0  0  0  0  0  0  0  0
  209.4929  179.3220  251.9914 O   0  0  0  0  0  0  0  0  0  0  0  0
  210.5900  178.9889  252.8398 C   0  0  0  0  0  0  0  0  0  0  0  0
  210.5203  177.5333  253.2438 C   0  0  0  0  0  0  0  0  0  0  0  0
  1  2  1  0  0  0  0
  2  3  1  0  0  0  0
  3  4  1  0  0  0  0
  4  9  1  0  0  0  0
  4  5  2  0  0  0  0
  5  6  1  0  0  0  0
  5 27  1  0  0  0  0
  6  7  2  0  0  0  0
  7 13  1  0  0  0  0
  7  8  1  0  0  0  0
  8  9  2  0  0  0  0
  8 10  1  0  0  0  0
 10 11  2  0  0  0  0
 11 12  1  0  0  0  0
 12 21  1  0  0  0  0
 12 13  2  0  0  0  0
 13 14  1  0  0  0  0
 14 15  2  0  0  0  0
 14 26  1  0  0  0  0
 15 16  1  0  0  0  0
 16 21  1  0  0  0  0
 16 17  2  0  0  0  0
 17 18  1  0  0  0  0
 18 19  2  0  0  0  0
 18 24  1  0  0  0  0
 19 20  1  0  0  0  0
 19 22  1  0  0  0  0
 20 21  2  0  0  0  0
 22 23  1  0  0  0  0
 24 25  1  0  0  0  0
 27 28  1  0  0  0  0
 28 29  1  0  0  0  0
M  CHG  1  14   1
M  END
>  <CHROM.1>
179.98139549,-151.53919265,134.36852834,68.17358423,-31.77168930,-179.47914496
210.10101128,184.19408375,252.54450925,1.80942847,1.15502522,-2.91922899

>  <Name>


>  <RI>
0

>  <Rbt.Current_Directory>
/data/dnb03/galaxy_db/job_working_directory/014/442/14442420/working

>  <Rbt.Executable>
rbdock ($Id: //depot/dev/client3/rdock/2013.1/src/exe/rbdock.cxx#4 $)

>  <Rbt.Library>
libRbt.so (2013.1, Build901 2013/11/27)

>  <Rbt.Parameter_File>
/usr/local/tools/_conda/envs/__rdock@2013.1-0/share/rdock-2013.1-1/data/scripts/dock.prm

>  <Rbt.Receptor>
receptor.prm

>  <SCORE>
8.95773

>  <SCORE.INTER>
11.4

>  <SCORE.INTER.CONST>
1

>  <SCORE.INTER.POLAR>
0

>  <SCORE.INTER.REPUL>
0

>  <SCORE.INTER.ROT>
6

>  <SCORE.INTER.VDW>
0

>  <SCORE.INTER.norm>
0.393103

>  <SCORE.INTRA>
-2.44227

>  <SCORE.INTRA.DIHEDRAL>
3.95421

>  <SCORE.INTRA.DIHEDRAL.0>
4.90064

>  <SCORE.INTRA.POLAR>
0

>  <SCORE.INTRA.POLAR.0>
0

>  <SCORE.INTRA.REPUL>
0

>  <SCORE.INTRA.REPUL.0>
0

>  <SCORE.INTRA.VDW>
-4.41938

>  <SCORE.INTRA.VDW.0>
6.08017

>  <SCORE.INTRA.norm>
-0.0842163

>  <SCORE.RESTR>


>  <SCORE.RESTR.norm>
0

>  <SCORE.SYSTEM>
0

>  <SCORE.SYSTEM.CONST>
0

>  <SCORE.SYSTEM.DIHEDRAL>
0

>  <SCORE.SYSTEM.norm>
0

>  <SCORE.heavy>
29

>  <SCORE.norm>
0.308887

>  <TransFSReceptor>
receptor

>  <TransFSScore>
0.000847

$$$$

 OpenBabel01192115203D
libRbt.so/2013.1/901 2013/11/27
 26 29  0  0  0  0  0  0  0  0999 V2000
  201.0271  202.5893  258.5009 C   0  0  0  0  0  0  0  0  0  0  0  0
  200.9755  201.4942  257.4532 C   0  0  0  0  0  0  0  0  0  0  0  0
  200.7994  202.0557  256.1491 O   0  0  0  0  0  0  0  0  0  0  0  0
  200.7267  201.1784  255.0933 C   0  0  0  0  0  0  0  0  0  0  0  0
  199.9701  199.9981  255.1881 C   0  0  0  0  0  0  0  0  0  0  0  0
  199.9489  199.0544  254.1614 C   0  0  0  0  0  0  0  0  0  0  0  0
  200.6794  199.2730  253.0090 C   0  0  0  0  0  0  0  0  0  0  0  0
  201.4418  200.4356  252.8826 C   0  0  0  0  0  0  0  0  0  0  0  0
  201.4746  201.4020  253.9106 C   0  0  0  0  0  0  0  0  0  0  0  0
  202.3015  202.5406  253.6821 N   0  0  0  0  0  0  0  0  0  0  0  0
  202.3193  203.7691  254.2843 C   0  0  0  0  0  0  0  0  0  0  0  0
  203.3998  204.4711  253.8501 C   0  0  0  0  0  0  0  0  0  0  0  0
  203.5059  205.7322  254.6035 C   0  0  0  0  0  0  0  0  0  0  0  0
  202.4892  205.4478  255.7792 C   0  0  0  0  0  0  0  0  0  0  0  0
  201.6055  204.3713  255.2702 N   0  0  0  0  0  0  0  0  0  0  0  0
  204.0222  203.6483  252.8983 C   0  0  0  0  0  0  0  0  0  0  0  0
  203.3164  202.5022  252.7372 N   0  0  0  0  0  0  0  0  0  0  0  0
  205.3342  203.8280  252.1976 C   0  0  0  0  0  0  0  0  0  0  0  0
  206.0349  205.0217  252.8078 C   0  0  0  0  0  0  0  0  0  0  0  0
  206.1014  206.2233  252.0732 C   0  0  0  0  0  0  0  0  0  0  0  0
  206.7196  207.3609  252.5992 C   0  0  0  0  0  0  0  0  0  0  0  0
  207.2783  207.3230  253.8727 C   0  0  0  0  0  0  0  0  0  0  0  0
  207.2474  206.1372  254.6046 C   0  0  0  0  0  0  0  0  0  0  0  0
  206.6433  204.9911  254.0732 C   0  0  0  0  0  0  0  0  0  0  0  0
  206.7222  203.5490  255.0221 Cl  0  0  0  0  0  0  0  0  0  0  0  0
  201.1651  203.7647  255.9589 H   0  0  0  0  0  0  0  0  0  0  0  0
  1  2  1  0  0  0  0
  2  3  1  0  0  0  0
  3  4  1  0  0  0  0
  4  9  1  0  0  0  0
  4  5  2  0  0  0  0
  5  6  1  0  0  0  0
  6  7  2  0  0  0  0
  7  8  1  0  0  0  0
  8  9  2  0  0  0  0
  9 10  1  0  0  0  0
 10 17  1  0  0  0  0
 10 11  1  0  0  0  0
 11 15  1  0  0  0  0
 11 12  2  0  0  0  0
 12 13  1  0  0  0  0
 12 16  1  0  0  0  0
 13 14  1  0  0  0  0
 14 15  1  0  0  0  0
 15 26  1  0  0  0  0
 16 17  2  0  0  0  0
 16 18  1  0  0  0  0
 18 19  1  0  0  0  0
 19 24  1  0  0  0  0
 19 20  2  0  0  0  0
 20 21  1  0  0  0  0
 21 22  2  0  0  0  0
 22 23  1  0  0  0  0
 23 24  2  0  0  0  0
 24 25  1  0  0  0  0
M  END
>  <CHROM.1>
-179.65029246,43.01075095,-19.20556579,6.90382595,-106.51448900,203.44722058
203.37649943,254.37446975,2.96286614,-0.70614056,-2.13863373

>  <Name>


>  <RI>
0

>  <Rbt.Current_Directory>
/data/dnb03/galaxy_db/job_working_directory/014/442/14442421/working

>  <Rbt.Executable>
rbdock ($Id: //depot/dev/client3/rdock/2013.1/src/exe/rbdock.cxx#4 $)

>  <Rbt.Library>
libRbt.so (2013.1, Build901 2013/11/27)

>  <Rbt.Parameter_File>
/usr/local/tools/_conda/envs/__rdock@2013.1-0/share/rdock-2013.1-1/data/scripts/dock.prm

>  <Rbt.Receptor>
receptor.prm

>  <SCORE>
9.16367

>  <SCORE.INTER>
10.4

>  <SCORE.INTER.CONST>
1

>  <SCORE.INTER.POLAR>
0

>  <SCORE.INTER.REPUL>
0

>  <SCORE.INTER.ROT>
5

>  <SCORE.INTER.VDW>
0

>  <SCORE.INTER.norm>
0.416

>  <SCORE.INTRA>
-1.23633

>  <SCORE.INTRA.DIHEDRAL>
1.21032

>  <SCORE.INTRA.DIHEDRAL.0>
3.69622

>  <SCORE.INTRA.POLAR>
-0.00692466

>  <SCORE.INTRA.POLAR.0>
-0.75202

>  <SCORE.INTRA.REPUL>
0

>  <SCORE.INTRA.REPUL.0>
0

>  <SCORE.INTRA.VDW>
-1.81795

>  <SCORE.INTRA.VDW.0>
-0.775822

>  <SCORE.INTRA.norm>
-0.0494531

>  <SCORE.RESTR>


>  <SCORE.RESTR.norm>
0

>  <SCORE.SYSTEM>
0

>  <SCORE.SYSTEM.CONST>
0

>  <SCORE.SYSTEM.DIHEDRAL>
0

>  <SCORE.SYSTEM.norm>
0

>  <SCORE.heavy>
25

>  <SCORE.norm>
0.366547

>  <TransFSReceptor>
receptor

>  <TransFSScore>
0.000035

$$$$

 OpenBabel01192115203D
libRbt.so/2013.1/901 2013/11/27
 29 32  0  0  0  0  0  0  0  0999 V2000
  219.4726  193.4425  232.0787 C   0  0  0  0  0  0  0  0  0  0  0  0
  218.4588  192.5439  232.5096 O   0  0  0  0  0  0  0  0  0  0  0  0
  218.7529  191.7274  233.5781 C   0  0  0  0  0  0  0  0  0  0  0  0
  219.8379  190.8306  233.5543 C   0  0  0  0  0  0  0  0  0  0  0  0
  220.1645  190.0664  234.6727 C   0  0  0  0  0  0  0  0  0  0  0  0
  219.3933  190.1666  235.8166 C   0  0  0  0  0  0  0  0  0  0  0  0
  218.2953  191.0294  235.8373 C   0  0  0  0  0  0  0  0  0  0  0  0
  217.9409  191.8411  234.7374 C   0  0  0  0  0  0  0  0  0  0  0  0
  216.8823  192.7289  234.8637 N   0  0  0  0  0  0  0  0  0  0  0  0
  216.3585  193.0984  236.1850 C   0  0  0  0  0  0  0  0  0  0  0  0
  216.2031  194.6338  236.2659 C   0  0  0  0  0  0  0  0  0  0  0  0
  215.3656  195.2427  235.2041 N   0  0  0  0  0  0  0  0  0  0  0  0
  215.9158  194.7987  233.8911 C   0  0  0  0  0  0  0  0  0  0  0  0
  216.1198  193.2686  233.7273 C   0  0  0  0  0  0  0  0  0  0  0  0
  213.9363  194.8989  235.3329 C   0  0  0  0  0  0  0  0  0  0  0  0
  213.1918  195.7788  236.3583 C   0  0  0  0  0  0  0  0  0  0  0  0
  213.7527  195.6793  237.7001 N   0  0  0  0  0  0  0  0  0  0  0  0
  214.5954  196.7147  238.1227 C   0  0  0  0  0  0  0  0  0  0  0  0
  214.8184  197.7351  237.4814 O   0  0  0  0  0  0  0  0  0  0  0  0
  215.2092  196.4871  239.4126 C   0  0  0  0  0  0  0  0  0  0  0  0
  214.8659  195.3740  240.1197 C   0  0  0  0  0  0  0  0  0  0  0  0
  213.9667  194.4428  239.7068 N   0  0  0  0  0  0  0  0  0  0  0  0
  213.3733  194.5776  238.4752 C   0  0  0  0  0  0  0  0  0  0  0  0
  212.5473  193.7391  238.1079 O   0  0  0  0  0  0  0  0  0  0  0  0
  215.6489  195.2014  241.5954 S   0  0  0  0  0  0  0  0  0  0  0  0
  216.5004  196.6500  241.3174 C   0  0  0  0  0  0  0  0  0  0  0  0
  216.1789  197.2556  240.1247 C   0  0  0  0  0  0  0  0  0  0  0  0
  217.6346  197.2076  242.4782 Cl  0  0  0  0  0  0  0  0  0  0  0  0
  213.7341  193.6415  240.2785 H   0  0  0  0  0  0  0  0  0  0  0  0
  1  2  1  0  0  0  0
  2  3  1  0  0  0  0
  3  8  1  0  0  0  0
  3  4  2  0  0  0  0
  4  5  1  0  0  0  0
  5  6  2  0  0  0  0
  6  7  1  0  0  0  0
  7  8  2  0  0  0  0
  8  9  1  0  0  0  0
  9 14  1  0  0  0  0
  9 10  1  0  0  0  0
 10 11  1  0  0  0  0
 11 12  1  0  0  0  0
 12 13  1  0  0  0  0
 12 15  1  0  0  0  0
 13 14  1  0  0  0  0
 15 16  1  0  0  0  0
 16 17  1  0  0  0  0
 17 23  1  0  0  0  0
 17 18  1  0  0  0  0
 18 19  2  0  0  0  0
 18 20  1  0  0  0  0
 20 27  1  0  0  0  0
 20 21  2  0  0  0  0
 21 22  1  0  0  0  0
 21 25  1  0  0  0  0
 22 23  1  0  0  0  0
 22 29  1  0  0  0  0
 23 24  2  0  0  0  0
 25 26  1  0  0  0  0
 26 27  2  0  0  0  0
 26 28  1  0  0  0  0
M  END
>  <CHROM.1>
-58.46625676,-160.72058701,81.73656957,-59.65261552,100.85044599,216.27745018
194.39367364,237.21302297,-1.18214728,-0.48810900,1.19733917

>  <Name>


>  <RI>
0

>  <Rbt.Current_Directory>
/data/dnb03/galaxy_db/job_working_directory/014/442/14442422/working

>  <Rbt.Executable>
rbdock ($Id: //depot/dev/client3/rdock/2013.1/src/exe/rbdock.cxx#4 $)

>  <Rbt.Library>
libRbt.so (2013.1, Build901 2013/11/27)

>  <Rbt.Parameter_File>
/usr/local/tools/_conda/envs/__rdock@2013.1-0/share/rdock-2013.1-1/data/scripts/dock.prm

>  <Rbt.Receptor>
receptor.prm

>  <SCORE>
8.22345

>  <SCORE.INTER>
10.4

>  <SCORE.INTER.CONST>
1

>  <SCORE.INTER.POLAR>
0

>  <SCORE.INTER.REPUL>
0

>  <SCORE.INTER.ROT>
5

>  <SCORE.INTER.VDW>
0

>  <SCORE.INTER.norm>
0.371429

>  <SCORE.INTRA>
-2.17655

>  <SCORE.INTRA.DIHEDRAL>
0.70619

>  <SCORE.INTRA.DIHEDRAL.0>
7.50843

>  <SCORE.INTRA.POLAR>
0

>  <SCORE.INTRA.POLAR.0>
0

>  <SCORE.INTRA.REPUL>
0

>  <SCORE.INTRA.REPUL.0>
0

>  <SCORE.INTRA.VDW>
-2.52964

>  <SCORE.INTRA.VDW.0>
2.34041

>  <SCORE.INTRA.norm>
-0.0777339

>  <SCORE.RESTR>


>  <SCORE.RESTR.norm>
0

>  <SCORE.SYSTEM>
0

>  <SCORE.SYSTEM.CONST>
0

>  <SCORE.SYSTEM.DIHEDRAL>
0

>  <SCORE.SYSTEM.norm>
0

>  <SCORE.heavy>
28

>  <SCORE.norm>
0.293695

>  <TransFSReceptor>
receptor

>  <TransFSScore>
0.000184

$$$$

 OpenBabel01192115203D
libRbt.so/2013.1/901 2013/11/27
 23 23  0  0  0  0  0  0  0  0999 V2000
  186.8579  215.7976  266.9569 C   0  0  0  0  0  0  0  0  0  0  0  0
  187.1734  216.1755  265.5173 C   0  0  0  0  0  0  0  0  0  0  0  0
  188.2236  215.2479  264.9179 C   0  0  0  0  0  0  0  0  0  0  0  0
  188.5539  215.6104  263.4651 C   0  0  0  0  0  0  0  0  0  0  0  0
  189.6078  214.6464  262.9394 C   0  0  0  0  0  0  0  0  0  0  0  0
  189.9719  214.9229  261.5812 O   0  0  0  0  0  0  0  0  0  0  0  0
  190.9270  214.0650  261.0829 C   0  0  0  0  0  0  0  0  0  0  0  0
  190.8970  212.6850  261.2549 C   0  0  0  0  0  0  0  0  0  0  0  0
  191.8848  211.8748  260.7103 C   0  0  0  0  0  0  0  0  0  0  0  0
  192.9367  212.4099  259.9734 C   0  0  0  0  0  0  0  0  0  0  0  0
  192.9877  213.7995  259.8059 C   0  0  0  0  0  0  0  0  0  0  0  0
  191.9851  214.6225  260.3597 C   0  0  0  0  0  0  0  0  0  0  0  0
  193.9239  211.5877  259.3881 N   0  0  0  0  0  0  0  0  0  0  0  0
  193.9557  210.2031  259.4628 C   0  0  0  0  0  0  0  0  0  0  0  0
  193.2019  209.4471  260.0680 O   0  0  0  0  0  0  0  0  0  0  0  0
  195.0774  209.5321  258.6626 C   0  0  0  0  0  0  0  0  0  0  0  0
  195.8670  210.1976  258.0098 O   0  0  0  0  0  0  0  0  0  0  0  0
  195.0293  208.1488  258.7894 N   0  0  0  0  0  0  0  0  0  0  0  0
  195.9747  207.3097  258.1811 N   0  0  0  0  0  0  0  0  0  0  0  0
  194.6597  212.0232  258.8390 H   0  0  0  0  0  0  0  0  0  0  0  0
  194.3264  207.7685  259.4312 H   0  0  0  0  0  0  0  0  0  0  0  0
  195.5498  206.9091  257.3367 H   0  0  0  0  0  0  0  0  0  0  0  0
  196.1427  206.5144  258.8021 H   0  0  0  0  0  0  0  0  0  0  0  0
  1  2  1  0  0  0  0
  2  3  1  0  0  0  0
  3  4  1  0  0  0  0
  4  5  1  0  0  0  0
  5  6  1  0  0  0  0
  6  7  1  0  0  0  0
  7 12  1  0  0  0  0
  7  8  2  0  0  0  0
  8  9  1  0  0  0  0
  9 10  2  0  0  0  0
 10 11  1  0  0  0  0
 10 13  1  0  0  0  0
 11 12  2  0  0  0  0
 13 14  1  0  0  0  0
 13 20  1  0  0  0  0
 14 15  2  0  0  0  0
 14 16  1  0  0  0  0
 16 17  2  0  0  0  0
 16 18  1  0  0  0  0
 18 19  1  0  0  0  0
 18 21  1  0  0  0  0
 19 22  1  0  0  0  0
 19 23  1  0  0  0  0
M  END
>  <CHROM.1>
179.88179490,179.85028947,-179.94135915,179.87765078,45.12416706,0.65024292
-0.36769088,-101.61630158,191.85762597,212.48662578,261.11800461,2.79692813
0.84996617,-0.37231030

>  <Name>


>  <RI>
0

>  <Rbt.Current_Directory>
/data/dnb03/galaxy_db/job_working_directory/014/442/14442423/working

>  <Rbt.Executable>
rbdock ($Id: //depot/dev/client3/rdock/2013.1/src/exe/rbdock.cxx#4 $)

>  <Rbt.Library>
libRbt.so (2013.1, Build901 2013/11/27)

>  <Rbt.Parameter_File>
/usr/local/tools/_conda/envs/__rdock@2013.1-0/share/rdock-2013.1-1/data/scripts/dock.prm

>  <Rbt.Receptor>
receptor.prm

>  <SCORE>
12.7823

>  <SCORE.INTER>
13.4

>  <SCORE.INTER.CONST>
1

>  <SCORE.INTER.POLAR>
0

>  <SCORE.INTER.REPUL>
0

>  <SCORE.INTER.ROT>
8

>  <SCORE.INTER.VDW>
0

>  <SCORE.INTER.norm>
0.705263

>  <SCORE.INTRA>
-0.617699

>  <SCORE.INTRA.DIHEDRAL>
2.33927

>  <SCORE.INTRA.DIHEDRAL.0>
0.474871

>  <SCORE.INTRA.POLAR>
0

>  <SCORE.INTRA.POLAR.0>
0

>  <SCORE.INTRA.REPUL>
0

>  <SCORE.INTRA.REPUL.0>
0

>  <SCORE.INTRA.VDW>
-1.78733

>  <SCORE.INTRA.VDW.0>
1.83765

>  <SCORE.INTRA.norm>
-0.0325105

>  <SCORE.RESTR>


>  <SCORE.RESTR.norm>
0

>  <SCORE.SYSTEM>
0

>  <SCORE.SYSTEM.CONST>
0

>  <SCORE.SYSTEM.DIHEDRAL>
0

>  <SCORE.SYSTEM.norm>
0

>  <SCORE.heavy>
19

>  <SCORE.norm>
0.672753

>  <TransFSReceptor>
receptor

>  <TransFSScore>
0.000091

$$$$

 OpenBabel01192115203D
libRbt.so/2013.1/901 2013/11/27
 70 72  0  0  0  0  0  0  0  0999 V2000
  213.0348  177.2919  250.5792 C   0  0  0  0  0  0  0  0  0  0  0  0
  213.9826  176.3561  251.3288 C   0  0  1  0  0  0  0  0  0  0  0  0
  214.4847  175.2509  250.3789 C   0  0  0  0  0  0  0  0  0  0  0  0
  214.2371  174.0573  250.5231 O   0  0  0  0  0  0  0  0  0  0  0  0
  215.3046  175.7095  249.3759 N   0  0  0  0  0  0  0  0  0  0  0  0
  215.8776  174.8607  248.3270 C   0  0  1  0  0  0  0  0  0  0  0  0
  215.6557  175.5031  246.9455 C   0  0  0  0  0  0  0  0  0  0  0  0
  216.1043  174.6355  245.7760 C   0  0  0  0  0  0  0  0  0  0  0  0
  215.3476  173.3364  245.6740 C   0  0  0  0  0  0  0  0  0  0  0  0
  214.5231  173.1171  244.7996 O   0  0  0  0  0  0  0  0  0  0  0  0
  215.6930  172.4152  246.5932 O   0  0  0  0  0  0  0  0  0  0  0  0
  217.3639  174.7188  248.7008 C   0  0  0  0  0  0  0  0  0  0  0  0
  218.2610  175.2902  248.0897 O   0  0  0  0  0  0  0  0  0  0  0  0
  217.6235  173.9466  249.7753 O   0  0  0  0  0  0  0  0  0  0  0  0
  215.1223  177.0945  251.8938 N   0  0  0  0  0  0  0  0  0  0  0  0
  215.0160  177.7778  253.0892 C   0  0  0  0  0  0  0  0  0  0  0  0
  214.0220  177.6815  253.8054 O   0  0  0  0  0  0  0  0  0  0  0  0
  216.1675  178.7769  253.3776 C   0  0  1  0  0  0  0  0  0  0  0  0
  217.3143  177.8538  253.7718 C   0  0  0  0  0  0  0  0  0  0  0  0
  216.5116  179.4547  252.1779 O   0  0  0  0  0  0  0  0  0  0  0  0
  217.6147  180.3749  252.1354 C   0  0  1  0  0  0  0  0  0  0  0  0
  217.9632  180.8514  250.6888 C   0  0  2  0  0  0  0  0  0  0  0  0
  216.7139  181.5251  250.0506 C   0  0  1  0  0  0  0  0  0  0  0  0
  216.2691  182.6226  250.8707 O   0  0  0  0  0  0  0  0  0  0  0  0
  215.8544  182.1744  252.1843 C   0  0  1  0  0  0  0  0  0  0  0  0
  217.0882  181.6192  252.9233 C   0  0  2  0  0  0  0  0  0  0  0  0
  218.0900  182.6281  253.0829 O   0  0  0  0  0  0  0  0  0  0  0  0
  215.1998  183.3498  252.9162 C   0  0  0  0  0  0  0  0  0  0  0  0
  216.1178  184.4433  252.9913 O   0  0  0  0  0  0  0  0  0  0  0  0
  216.9125  181.9626  248.7040 O   0  0  0  0  0  0  0  0  0  0  0  0
  215.5053  182.6093  247.9328 P   0  0  1  0  0  0  0  0  0  0  0  0
  216.3354  182.8714  246.6719 O   0  0  0  0  0  0  0  0  0  0  0  0
  214.8962  181.0883  247.7856 O   0  0  0  0  0  0  0  0  0  0  0  0
  214.0983  183.2559  247.1616 O   0  0  0  0  0  0  0  0  0  0  0  0
  214.1298  184.9829  247.2588 P   0  0  1  0  0  0  0  0  0  0  0  0
  214.9574  185.1366  245.9796 O   0  0  0  0  0  0  0  0  0  0  0  0
[truncated: 22,971,716 more chars]
